# Supplementary material for: Epithelial hypusination regulates Helicobacter pylori-induced gastric inflammation
Source: Amino Acids. 2026 Feb 2;58(1):28. doi: 10.1007/s00726-026-03496-3 (PMC13194257; doi:10.1007/s00726-026-03496-3)
Supplement: Supplementary file 1 — Supplementary Material 1 [file 726_2026_3496_MOESM1_ESM.xlsx]

## Sheet: Proteins
protein_fdr_confidence_combined	master	accession	description	exp_q_value_combined	sum_pep_score	coverage	_peptides	_psms	_unique_peptides	_protein_groups	_aas	score_sequest_ht_sequest_ht	_peptides_by_search_engine_sequest_ht	_razor_peptides	abundance_ratio_f1_127_f1_126	abundance_ratio_f1_128_f1_126	abundance_ratio_f1_129_f1_127	abundance_ratio_f1_129_f1_128	abundance_ratio_log2_f1_127_f1_126	abundance_ratio_log2_f1_128_f1_126	abundance_ratio_log2_f1_129_f1_127	abundance_ratio_log2_f1_129_f1_128	abundance_ratio_p_value_f1_127_f1_126	abundance_ratio_p_value_f1_128_f1_126	abundance_ratio_p_value_f1_129_f1_127	abundance_ratio_p_value_f1_129_f1_128	abundance_ratio_adj_p_value_f1_127_f1_126	abundance_ratio_adj_p_value_f1_128_f1_126	abundance_ratio_adj_p_value_f1_129_f1_127	abundance_ratio_adj_p_value_f1_129_f1_128	abundance_f1_126_sample	abundance_f1_127_sample	abundance_f1_128_sample	abundance_f1_129_sample	found_in_sample_s1_f1_126_sample	found_in_sample_s2_f1_127_sample	found_in_sample_s3_f1_128_sample	found_in_sample_s4_f1_129_sample	original_row
High	Master Protein	O08580	Steroid hormone receptor ERR1 OS=Mus musculus OX=10090 GN=Esrra PE=1 SV=4	0.002	6.219	5	2	2	2	1	422	4.71	2	0	3.597	0.984	0.218	0.797	1.85	-0.02	-2.2	-0.33	1e-17	0.387818	1e-17	0.140533	1.29244e-15	0.908438	1.11827e-15	0.679129	23302.4	83814.8	22930.3	18278.4	High	High	High	High	1
High	Master Protein	Q9DBF1	Alpha-aminoadipic semialdehyde dehydrogenase OS=Mus musculus OX=10090 GN=Aldh7a1 PE=1 SV=4	0	17.161	15	5	5	5	1	539	4.4	5	0	3.587	2.135	0.613	1.03	1.84	1.09	-0.71	0.04	2.8683e-10	0.00229284	0.000473639	0.776418	2.31695e-08	0.0387784	0.0114283	0.986585	1270.21	4556.15	2711.86	2793.52	High	High	High	High	2
High	Master Protein	P11440	Cyclin-dependent kinase 1 OS=Mus musculus OX=10090 GN=Cdk1 PE=1 SV=3	0	16.417	12	3	5	2	1	297	14.09	3	0	2.479	1.779	0.407	0.567	1.31	0.83	-1.3	-0.82	4.44089e-16	6.07063e-05	1e-17	3.99691e-06	5.38088e-14	0.00168185	1.11827e-15	0.00019375	45238.6	112128	80460.1	45638.2	High	High	High	High	3
High	Master Protein	P70333	Heterogeneous nuclear ribonucleoprotein H2 OS=Mus musculus OX=10090 GN=Hnrnph2 PE=1 SV=1	0	91.023	29	10	25	4	1	449	74.96	10	0	2.47	3.334	0.675	0.5	1.3	1.74	-0.57	-1	1e-17	1e-17	9.29792e-10	3.38742e-11	1.29244e-15	9.09062e-16	6.21464e-08	3.45696e-09	784283	1.937e+06	2.61447e+06	1.30806e+06	High	High	High	High	4
High	Master Protein	Q9CPV7	Palmitoyltransferase ZDHHC6 OS=Mus musculus OX=10090 GN=Zdhhc6 PE=1 SV=1	0	10.731	6	2	2	2	1	413	5.3	2	0	1.893	0.927	0.485	0.99	0.92	-0.11	-1.04	-0.02	2.9885e-10	0.130251	3.22409e-13	0.917323	2.38098e-08	0.648246	3.07345e-11	0.997966	64854.1	122773	60136.8	59507.1	High	High	High	High	5
High	Master Protein	Q9Z130	Heterogeneous nuclear ribonucleoprotein D-like OS=Mus musculus OX=10090 GN=Hnrnpdl PE=1 SV=1	0	26.287	16	6	19	4	1	301	48.86	6	0	1.823	1.172	1.489	2.317	0.87	0.23	0.57	1.21	4.44089e-16	0.479595	0.0117088	5.75529e-11	5.38088e-14	0.938952	0.151979	5.67432e-09	369460	673496	432841	1.00289e+06	High	High	High	High	6
High	Master Protein	Q99020	Heterogeneous nuclear ribonucleoprotein A/B OS=Mus musculus OX=10090 GN=Hnrnpab PE=1 SV=1	0	129.671	54	18	52	17	1	285	136.99	18	1	1.808	1.127	1.197	1.921	0.85	0.17	0.26	0.94	4.16171e-09	0.648368	0.450695	4.02472e-05	2.88149e-07	0.97492	0.955524	0.00142755	4.50003e+06	8.1363e+06	5.07236e+06	9.74288e+06	High	High	High	High	7
Medium	Master Protein	Q8CHT1	Ephexin-1 OS=Mus musculus OX=10090 GN=Ngef PE=1 SV=1	0.011	3.918	3	2	2	2	1	710	2.37	2	0	1.79	1.776	1.249	1.259	0.84	0.83	0.32	0.33	0.000150223	0.0139158	0.902485	0.149943	0.00436849	0.162856	0.991669	0.694443	4572.79	8185.13	8120.5	10224.5	High	High	High	High	8
High	Master Protein	Q8BG05	Heterogeneous nuclear ribonucleoprotein A3 OS=Mus musculus OX=10090 GN=Hnrnpa3 PE=1 SV=1	0	281.929	52	29	125	26	1	379	328.19	29	1	1.72	0.99	1.231	2.14	0.78	-0.01	0.3	1.1	2.96952e-07	0.605954	0.311836	6.12934e-06	1.54203e-05	0.97181	0.900457	0.000274265	1.50985e+07	2.59678e+07	1.49443e+07	3.19735e+07	High	High	High	High	9
High	Master Protein	P27870	Proto-oncogene vav OS=Mus musculus OX=10090 GN=Vav1 PE=1 SV=1	0.005	5.018	3	2	2	2	1	845	2.31	2	0	1.697	2.427	1.135	0.793	0.76	1.28	0.18	-0.33	0.000935919	2.85784e-05	0.679682	0.254465	0.0211802	0.000857058	0.986902	0.827598	3745.14	6356.44	9088.43	7211.63	High	High	High	High	10
High	Master Protein	Q9Z204	Heterogeneous nuclear ribonucleoproteins C1/C2 OS=Mus musculus OX=10090 GN=Hnrnpc PE=1 SV=1	0	172.55	47	20	72	18	1	313	202.58	20	1	1.678	1.093	1.296	1.99	0.75	0.13	0.37	0.99	9.91936e-07	0.702875	0.143902	4.96161e-05	4.84798e-05	0.98508	0.712163	0.00171796	9.32074e+06	1.56407e+07	1.0187e+07	2.02714e+07	High	High	High	High	11
High	Master Protein	Q9ERB0	Synaptosomal-associated protein 29 OS=Mus musculus OX=10090 GN=Snap29 PE=1 SV=1	0	30.39	28	7	10	7	1	260	24.02	7	0	1.648	0.908	0.587	1.065	0.72	-0.14	-0.77	0.09	5.44271e-11	0.101663	4.77396e-13	0.721832	4.86997e-09	0.575924	4.40644e-11	0.974868	363437	598950	329826	351366	High	High	High	High	12
High	Master Protein	Q9D708	Protein S100-A16 OS=Mus musculus OX=10090 GN=S100a16 PE=1 SV=1	0	15.305	22	3	3	3	1	124	7.46	3	0	1.644	0.799	0.528	1.086	0.72	-0.32	-0.92	0.12	5.41471e-07	0.00609779	3.79852e-12	0.464899	2.69162e-05	0.0867406	3.11104e-10	0.938958	113942	187364	91069.1	98861.6	High	High	High	High	13
High	Master Protein	P84104	Serine/arginine-rich splicing factor 3 OS=Mus musculus OX=10090 GN=Srsf3 PE=1 SV=1	0	55.151	43	9	26	8	1	164	59.38	9	1	1.623	1.189	1.537	2.097	0.7	0.25	0.62	1.07	1.10905e-11	0.310084	0.000967221	4.12026e-12	1.09326e-09	0.876061	0.0209865	4.89134e-10	1.03553e+06	1.68094e+06	1.23173e+06	2.58339e+06	High	High	High	High	14
High	Master Protein	Q9JLB0	Protein PALS2 OS=Mus musculus OX=10090 GN=Pals2 PE=1 SV=1	0	26.912	13	6	6	6	1	553	17.91	6	0	1.602	1.089	0.624	0.919	0.68	0.12	-0.68	-0.12	4.19032e-08	0.995855	1.41984e-09	0.414315	2.41296e-06	0.999773	9.17376e-08	0.920105	191446	306723	208485	191547	High	High	High	High	15
High	Master Protein	P09405	Nucleolin OS=Mus musculus OX=10090 GN=Ncl PE=1 SV=2	0	242.767	49	47	115	47	1	707	254.78	47	0	1.577	1.228	1.337	1.716	0.66	0.3	0.42	0.78	1.66982e-05	0.150045	0.082689	0.00187992	0.000578075	0.689986	0.549414	0.0387783	1.39506e+07	2.19936e+07	1.71378e+07	2.9409e+07	High	High	High	High	16
High	Master Protein	Q8VDD9	PH-interacting protein OS=Mus musculus OX=10090 GN=Phip PE=1 SV=2	0.001	8.438	1	2	2	2	1	1821	2.7	2	0	1.564	1.843	1.067	0.906	0.65	0.88	0.09	-0.14	0.010893	0.0147571	0.464851	0.738451	0.149937	0.169677	0.957031	0.977575	2547.49	3984.97	4694.84	4253.36	High	High	High	High	17
High	Master Protein	Q8BTZ4	Anaphase-promoting complex subunit 5 OS=Mus musculus OX=10090 GN=Anapc5 PE=1 SV=1	0.001	8.807	5	2	2	2	1	740	3.41	2	0	1.55	2.008	1.389	1.072	0.63	1.01	0.47	0.1	0.0017124	0.000696661	0.452374	0.595059	0.035068	0.0144756	0.955524	0.96579	5763.09	8931	11573.4	12401.6	High	High	High	High	18
High	Master Protein	Q60668	Heterogeneous nuclear ribonucleoprotein D0 OS=Mus musculus OX=10090 GN=Hnrnpd PE=1 SV=2	0	109.986	42	16	44	14	1	355	108.1	16	1	1.546	1.226	1.259	1.588	0.63	0.29	0.33	0.67	1.9085e-07	0.165279	0.228392	0.00155545	1.01833e-05	0.72214	0.845195	0.0331431	4.04763e+06	6.25744e+06	4.96057e+06	7.87974e+06	High	High	High	High	19
High	Master Protein	P49312	Heterogeneous nuclear ribonucleoprotein A1 OS=Mus musculus OX=10090 GN=Hnrnpa1 PE=1 SV=2	0	163.432	50	17	65	11	1	320	201.28	17	0	1.524	1.078	1.153	1.631	0.61	0.11	0.21	0.71	4.31443e-09	0.874726	0.875344	2.69605e-05	2.88422e-07	0.995494	0.990777	0.000992589	1.92924e+06	2.9394e+06	2.07893e+06	3.39023e+06	High	High	High	High	20
High	Master Protein	Q6PDM2	Serine/arginine-rich splicing factor 1 OS=Mus musculus OX=10090 GN=Srsf1 PE=1 SV=3	0	57.811	45	12	24	11	1	248	54.14	12	1	1.52	0.969	1.61	2.526	0.6	-0.05	0.69	1.34	3.85594e-09	0.149718	0.000330878	6.66134e-16	2.70195e-07	0.689128	0.00851352	1.13968e-13	2.01866e+06	3.06781e+06	1.95607e+06	4.94057e+06	High	High	High	High	21
High	Master Protein	Q8R081	Heterogeneous nuclear ribonucleoprotein L OS=Mus musculus OX=10090 GN=Hnrnpl PE=1 SV=2	0	277.705	54	26	90	26	1	586	317.63	26	0	1.488	1.118	1.331	1.771	0.57	0.16	0.41	0.82	0.000169152	0.55563	0.0897835	0.000925075	0.00483103	0.958912	0.57036	0.0223285	1.01555e+07	1.5113e+07	1.13574e+07	2.01194e+07	High	High	High	High	22
High	Master Protein	O88569	Heterogeneous nuclear ribonucleoproteins A2/B1 OS=Mus musculus OX=10090 GN=Hnrnpa2b1 PE=1 SV=2	0	318.716	75	33	159	28	1	353	545.26	33	5	1.488	1.036	1.243	1.786	0.57	0.05	0.31	0.84	0.000169451	0.918151	0.272435	0.000766458	0.00483103	0.995494	0.867824	0.0193008	2.39967e+07	3.5709e+07	2.48608e+07	4.44011e+07	High	High	High	High	23
High	Master Protein	Q3TWW8	Serine/arginine-rich splicing factor 6 OS=Mus musculus OX=10090 GN=Srsf6 PE=1 SV=1	0	43.961	29	12	15	10	1	339	28.46	12	2	1.477	1.09	1.523	2.063	0.56	0.12	0.61	1.04	4.17554e-08	0.99847	0.00183804	5.45497e-12	2.41296e-06	0.999773	0.0357464	6.34631e-10	1.12398e+06	1.66013e+06	1.22504e+06	2.52757e+06	High	High	High	High	24
High	Master Protein	P97801	Survival motor neuron protein OS=Mus musculus OX=10090 GN=Smn1 PE=1 SV=1	0.001	7.857	13	3	4	3	1	288	2.22	3	0	1.447	2.392	1.489	0.901	0.53	1.26	0.57	-0.15	0.0247556	0.000113502	0.292071	0.696746	0.265643	0.0028963	0.885753	0.970324	2895.76	4189.98	6927.52	6238.83	High	High	High	High	25
High	Master Protein	Q8VE97	Serine/arginine-rich splicing factor 4 OS=Mus musculus OX=10090 GN=Srsf4 PE=2 SV=1	0	19.291	9	5	6	3	1	489	18.12	5	0	1.442	1.169	1.511	1.863	0.53	0.23	0.6	0.9	1.04795e-05	0.48953	0.0117452	1.27164e-07	0.000409053	0.943699	0.152112	8.21901e-06	194559	280471	227428	423656	High	High	High	High	26
High	Master Protein	P31001	Desmin OS=Mus musculus OX=10090 GN=Des PE=1 SV=3	0	74.39	32	16	49	10	1	469	108.05	16	0	1.432	0.832	0.772	1.329	0.52	-0.27	-0.37	0.41	4.20125e-07	0.0119313	1.75829e-05	0.0182299	2.10642e-05	0.145833	0.000612242	0.219097	313571	449056	260837	346660	High	High	High	High	27
High	Master Protein	Q9EQQ9	Protein O-GlcNAcase OS=Mus musculus OX=10090 GN=Oga PE=1 SV=2	0	18.903	6	4	4	4	1	916	11.37	4	0	1.427	1.192	0.803	0.961	0.51	0.25	-0.32	-0.06	0.000538487	0.632894	0.000681379	0.751809	0.013159	0.97492	0.0154172	0.979237	31932.9	45578.1	38051.8	36585.5	High	High	High	High	28
High	Master Protein	Q9JM52	Misshapen-like kinase 1 OS=Mus musculus OX=10090 GN=Mink1 PE=1 SV=3	0	15.552	4	6	7	6	1	1308	13.97	6	0	1.422	1.334	0.789	0.842	0.51	0.42	-0.34	-0.25	1.58977e-06	0.0560864	7.63441e-05	0.0994747	7.45653e-05	0.418347	0.00234889	0.578526	260175	369999	346971	291987	High	High	High	High	29
High	Master Protein	Q64362	AKT-interacting protein OS=Mus musculus OX=10090 GN=Aktip PE=1 SV=1	0	18.623	16	4	4	4	1	292	10.7	4	0	1.421	1.167	0.711	0.866	0.51	0.22	-0.49	-0.21	0.00190372	0.809111	0.000564519	0.443912	0.0381794	0.991263	0.0131834	0.930052	13535.8	19235.1	15795.9	13684.9	High	High	High	High	30
High	Master Protein	Q8BSK8	Ribosomal protein S6 kinase beta-1 OS=Mus musculus OX=10090 GN=Rps6kb1 PE=1 SV=2	0.002	7.155	5	3	3	2	1	525	3.21	3	0	1.409	1.444	0.934	0.912	0.49	0.53	-0.1	-0.13	0.000304333	0.0128286	0.0503185	0.463563	0.00811928	0.152944	0.415039	0.937929	116898	164744	168784	153877	High	High	High	High	31
High	Master Protein	A2APV2	Formin-like protein 2 OS=Mus musculus OX=10090 GN=Fmnl2 PE=1 SV=2	0.002	7.525	3	2	2	2	1	1086	5.17	2	0	1.401	1.968	1.103	0.785	0.49	0.98	0.14	-0.35	0.0125859	0.00105405	0.578817	0.219763	0.164789	0.0200994	0.970956	0.786198	5399.86	7567.48	10629.4	8345.33	High	High	High	High	32
High	Master Protein	Q91Z98	Chitinase-like protein 4 OS=Mus musculus OX=10090 GN=Chil4 PE=1 SV=2	0	37.075	24	8	11	8	1	402	24.94	8	0	1.398	0.807	1.068	1.849	0.48	-0.31	0.09	0.89	1.64901e-05	0.00513707	0.342397	1.47469e-07	0.000574289	0.0756645	0.911286	9.42665e-06	240811	336686	194450	359591	High	High	High	High	33
High	Master Protein	Q64012	RNA-binding protein Raly OS=Mus musculus OX=10090 GN=Raly PE=1 SV=3	0	98.206	59	15	26	15	1	312	74.37	15	0	1.395	1.117	1.321	1.649	0.48	0.16	0.4	0.72	1.49195e-06	0.804909	0.124344	1.16017e-05	7.11246e-05	0.990901	0.6658	0.000485519	2.38859e+06	3.33179e+06	2.66801e+06	4.40002e+06	High	High	High	High	34
High	Master Protein	Q00PI9	Heterogeneous nuclear ribonucleoprotein U-like protein 2 OS=Mus musculus OX=10090 GN=Hnrnpul2 PE=1 SV=2	0	161.664	40	33	68	33	1	745	163.44	33	0	1.389	1.015	1.201	1.642	0.47	0.02	0.26	0.72	0.00140169	0.635219	0.428731	0.00356571	0.0293246	0.97492	0.948412	0.0662675	6.37925e+06	8.85883e+06	6.47719e+06	1.06376e+07	High	High	High	High	35
High	Master Protein	Q8K2H2	Deubiquitinase OTUD6B OS=Mus musculus OX=10090 GN=Otud6b PE=1 SV=1	0.002	6.156	6	2	3	2	1	294	4.85	2	0	1.385	1.018	3.409	4.637	0.47	0.03	1.77	2.21	4.40598e-06	0.514017	1e-17	1e-17	0.000189816	0.949985	1.11827e-15	1.81781e-15	354036	490231	360459	1.6714e+06	High	High	High	High	36
High	Master Protein	Q8CHQ0	F-box only protein 4 OS=Mus musculus OX=10090 GN=Fbxo4 PE=1 SV=2	0.002	7.034	7	2	2	2	1	385	2.24	2	0	1.378	1.438	0.773	0.74	0.46	0.52	-0.37	-0.43	0.00781322	0.121688	0.00773877	0.0887194	0.11742	0.625808	0.112222	0.556721	10580	14575.3	15209.9	11259.5	High	High	High	High	37
High	Master Protein	Q8VEK3	Heterogeneous nuclear ribonucleoprotein U OS=Mus musculus OX=10090 GN=Hnrnpu PE=1 SV=1	0	350.815	47	44	159	44	1	800	472.17	44	0	1.374	1.111	1.222	1.511	0.46	0.15	0.29	0.6	0.00264875	0.597936	0.346073	0.021904	0.0513505	0.969703	0.911286	0.248374	3.38623e+07	4.65119e+07	3.76112e+07	5.68193e+07	High	High	High	High	38
High	Master Protein	A2AR02	Peptidyl-prolyl cis-trans isomerase G OS=Mus musculus OX=10090 GN=Ppig PE=1 SV=1	0	9.151	4	3	5	3	1	752	5.94	3	0	1.371	0.998	1.17	1.606	0.46	0	0.23	0.68	0.0011267	0.401256	0.994877	0.000301584	0.0245426	0.912828	0.999985	0.00890515	70009.9	95983.8	69900.1	112278	High	High	High	High	39
High	Master Protein	Q99PL5	Ribosome-binding protein 1 OS=Mus musculus OX=10090 GN=Rrbp1 PE=1 SV=2	0	709.689	77	105	257	105	1	1605	688.61	105	0	1.366	0.965	0.787	1.114	0.45	-0.05	-0.35	0.16	0.00312831	0.456151	0.00349095	0.735726	0.0583149	0.930214	0.0575068	0.977551	5.16494e+07	7.0561e+07	4.98426e+07	5.55015e+07	High	High	High	High	40
High	Master Protein	Q61735	Leukocyte surface antigen CD47 OS=Mus musculus OX=10090 GN=Cd47 PE=1 SV=2	0	11.26	11	3	6	3	1	303	8.78	3	0	1.362	1.341	1.121	1.139	0.45	0.42	0.16	0.19	0.0020737	0.133453	0.59472	0.304085	0.041268	0.655767	0.970956	0.870663	45040.6	61367	60394.7	68797.9	High	High	High	High	41
High	Master Protein	P09671	Superoxide dismutase [Mn], mitochondrial OS=Mus musculus OX=10090 GN=Sod2 PE=1 SV=3	0	100.928	45	13	65	13	1	222	189.7	13	0	1.351	0.818	0.967	1.596	0.43	-0.29	-0.05	0.67	0.00441548	0.0252619	0.266982	0.00822287	0.0755307	0.247848	0.863956	0.127998	2.65883e+07	3.59099e+07	2.17581e+07	3.47196e+07	High	High	High	High	42
Medium	Master Protein	E9Q8D0	DnaJ homolog subfamily C member 21 OS=Mus musculus OX=10090 GN=Dnajc21 PE=1 SV=1	0.016	3.382	4	2	2	2	1	531	0	2	0	1.349	0.948	0.864	1.231	0.43	-0.08	-0.21	0.3	0.00428945	0.280271	0.0128865	0.189108	0.074028	0.854365	0.164331	0.746296	16032.7	21624.5	15191	18693.4	High	High	High	High	43
High	Master Protein	Q8BH95	Enoyl-CoA hydratase, mitochondrial OS=Mus musculus OX=10090 GN=Echs1 PE=1 SV=1	0	200.489	61	19	115	19	1	290	346.18	19	0	1.349	1.073	1.076	1.353	0.43	0.1	0.11	0.44	0.00453007	0.829223	0.865694	0.112386	0.0772637	0.991263	0.990777	0.607573	3.56645e+07	4.81264e+07	3.8272e+07	5.17979e+07	High	High	High	High	44
High	Master Protein	Q5RJG1	Nucleolar protein 10 OS=Mus musculus OX=10090 GN=Nol10 PE=2 SV=1	0	11.67	7	4	4	4	1	687	6.53	4	0	1.336	1.492	0.872	0.781	0.42	0.58	-0.2	-0.36	0.00664441	0.0344116	0.00783628	0.0722381	0.104726	0.298169	0.113072	0.501277	25220.2	33701.7	37618.9	29397.2	High	High	High	High	45
High	Master Protein	Q9JLJ2	4-trimethylaminobutyraldehyde dehydrogenase OS=Mus musculus OX=10090 GN=Aldh9a1 PE=1 SV=1	0	154.463	47	22	46	21	1	494	133.65	22	1	1.333	1.086	0.967	1.187	0.41	0.12	-0.05	0.25	0.000310102	0.944955	0.130586	0.174391	0.00819796	0.995981	0.677394	0.725386	4.35341e+06	5.80384e+06	4.72904e+06	5.61149e+06	High	High	High	High	46
High	Master Protein	P05202	Aspartate aminotransferase, mitochondrial OS=Mus musculus OX=10090 GN=Got2 PE=1 SV=1	0	290.909	63	33	141	33	1	430	402.73	33	0	1.331	0.859	0.994	1.54	0.41	-0.22	-0.01	0.62	0.00669993	0.0723725	0.383794	0.0158056	0.105316	0.485655	0.920315	0.197724	3.85515e+07	5.13245e+07	3.31219e+07	5.0994e+07	High	High	High	High	47
High	Master Protein	Q62376	U1 small nuclear ribonucleoprotein 70 kDa OS=Mus musculus OX=10090 GN=Snrnp70 PE=1 SV=2	0	48.963	30	13	18	13	1	448	36.67	13	0	1.33	0.99	1.566	2.104	0.41	-0.01	0.65	1.07	5.55434e-05	0.36268	0.0003709	6.82343e-13	0.00175565	0.901325	0.00945958	8.82042e-11	913871	1.21511e+06	904557	1.90289e+06	High	High	High	High	48
High	Master Protein	Q61425	Hydroxyacyl-coenzyme A dehydrogenase, mitochondrial OS=Mus musculus OX=10090 GN=Hadh PE=1 SV=2	0	224.179	72	24	123	24	1	314	308.72	24	0	1.326	0.873	1.013	1.539	0.41	-0.2	0.02	0.62	0.00752082	0.0978691	0.483704	0.0158851	0.115078	0.564945	0.957561	0.198251	2.88913e+07	3.83066e+07	2.52134e+07	3.8807e+07	High	High	High	High	49
High	Master Protein	P28063	Proteasome subunit beta type-8 OS=Mus musculus OX=10090 GN=Psmb8 PE=1 SV=2	0	9.244	10	3	3	3	1	276	4.94	3	0	1.325	1.034	0.7	0.896	0.41	0.05	-0.52	-0.16	5.01839e-05	0.610219	3.92185e-08	0.272254	0.00161254	0.973406	2.07323e-06	0.848177	366724	485753	379144	339813	High	High	High	High	50
High	Master Protein	Q9D0K2	Succinyl-CoA:3-ketoacid coenzyme A transferase 1, mitochondrial OS=Mus musculus OX=10090 GN=Oxct1 PE=1 SV=1	0	347.252	52	23	149	23	1	520	447.15	23	0	1.319	0.817	0.924	1.493	0.4	-0.29	-0.11	0.58	0.00864578	0.0243504	0.132496	0.0267864	0.126341	0.242607	0.681856	0.283753	2.90406e+07	3.83127e+07	2.37277e+07	3.54151e+07	High	High	High	High	51
High	Master Protein	Q8VED5	Keratin, type II cytoskeletal 79 OS=Mus musculus OX=10090 GN=Krt79 PE=1 SV=2	0	61.517	15	12	58	4	1	531	96.45	12	0	1.318	2.068	1.104	0.703	0.4	1.05	0.14	-0.51	0.000226535	1.28009e-12	0.628705	0.000779171	0.00627394	9.42727e-11	0.981698	0.0194548	664811	876413	1.37499e+06	967284	High	High	High	High	52
High	Master Protein	O08638	Myosin-11 OS=Mus musculus OX=10090 GN=Myh11 PE=1 SV=1	0	734.539	51	110	294	87	1	1972	750.65	110	1	1.318	1.161	0.862	0.978	0.4	0.22	-0.21	-0.03	0.00885403	0.352184	0.0340844	0.622361	0.12906	0.897112	0.324388	0.96579	1.02266e+07	1.34801e+07	1.1876e+07	1.16175e+07	High	High	High	High	53
High	Master Protein	P60521	Gamma-aminobutyric acid receptor-associated protein-like 2 OS=Mus musculus OX=10090 GN=Gabarapl2 PE=1 SV=1	0.001	7.757	23	3	4	2	1	117	6.86	3	0	1.314	1.205	0.995	1.085	0.39	0.27	-0.01	0.12	0.00117933	0.342865	0.130267	0.54594	0.0254921	0.896637	0.677394	0.965089	169325	222538	204037	221462	High	High	High	High	54
High	Master Protein	P32067	Lupus La protein homolog OS=Mus musculus OX=10090 GN=Ssb PE=1 SV=1	0	130.611	50	28	46	28	1	415	114.4	28	0	1.308	1.187	1.34	1.477	0.39	0.25	0.42	0.56	0.000308962	0.303308	0.0752615	0.00324707	0.00819796	0.874021	0.517924	0.0607337	3.93116e+06	5.14301e+06	4.66529e+06	6.89249e+06	High	High	High	High	55
High	Master Protein	P54071	Isocitrate dehydrogenase [NADP], mitochondrial OS=Mus musculus OX=10090 GN=Idh2 PE=1 SV=3	0	310.5	61	31	151	30	1	452	478.87	31	1	1.301	0.983	0.991	1.311	0.38	-0.02	-0.01	0.39	0.0126085	0.564486	0.371809	0.165838	0.164789	0.960168	0.91735	0.718972	3.41313e+07	4.44068e+07	3.35582e+07	4.40096e+07	High	High	High	High	56
High	Master Protein	Q8K0E7	Serine incorporator 2 OS=Mus musculus OX=10090 GN=Serinc2 PE=2 SV=1	0.006	4.574	6	2	2	2	1	450	2.05	2	0	1.297	0.859	0.998	1.506	0.37	-0.22	0	0.59	0.00109231	0.0225745	0.121082	0.000541325	0.0238831	0.231229	0.659877	0.014646	194315	251945	166912	251419	High	High	High	High	57
High	Master Protein	Q2YDW2	Protein misato homolog 1 OS=Mus musculus OX=10090 GN=Msto1 PE=1 SV=1	0	12.694	7	3	3	3	1	556	7.74	3	0	1.293	1.173	0.646	0.712	0.37	0.23	-0.63	-0.49	0.0270994	0.82983	0.000431697	0.0785838	0.28195	0.991263	0.0107251	0.523023	8851.72	11447.1	10385.6	7396	High	High	High	High	58
High	Master Protein	Q8QZT1	Acetyl-CoA acetyltransferase, mitochondrial OS=Mus musculus OX=10090 GN=Acat1 PE=1 SV=1	0	392.014	63	30	222	30	1	424	748.9	30	0	1.29	0.902	0.999	1.428	0.37	-0.15	0	0.51	0.0157073	0.176187	0.410281	0.0532895	0.193546	0.730572	0.940644	0.428156	5.42071e+07	6.99379e+07	4.89153e+07	6.9865e+07	High	High	High	High	59
High	Master Protein	Q9D1H9	Microfibril-associated glycoprotein 4 OS=Mus musculus OX=10090 GN=Mfap4 PE=1 SV=1	0	26.681	18	3	4	3	1	257	17.34	3	0	1.289	1.328	0.904	0.878	0.37	0.41	-0.14	-0.19	0.00052156	0.0447244	0.0144631	0.206819	0.0128534	0.362405	0.175947	0.769223	585243	754230	777100	682200	High	High	High	High	60
High	Master Protein	O08601	Microsomal triglyceride transfer protein large subunit OS=Mus musculus OX=10090 GN=Mttp PE=1 SV=2	0.003	5.848	2	2	2	2	1	894	5.07	2	0	1.287	1.032	1.146	1.428	0.36	0.05	0.2	0.51	0.00934722	0.575407	0.633972	0.0106576	0.134897	0.965076	0.981698	0.153454	19125.2	24614	19743.6	28198.5	High	High	High	High	61
High	Master Protein	Q09143	High affinity cationic amino acid transporter 1 OS=Mus musculus OX=10090 GN=Slc7a1 PE=1 SV=1	0	11.895	6	4	4	4	1	622	5.27	4	0	1.285	1.517	0.813	0.689	0.36	0.6	-0.3	-0.54	0.0201624	0.0523351	0.00999776	0.0254149	0.230246	0.399064	0.137116	0.273775	13497.9	17342.1	20478.4	14102.7	High	High	High	High	62
High	Master Protein	P08249	Malate dehydrogenase, mitochondrial OS=Mus musculus OX=10090 GN=Mdh2 PE=1 SV=3	0	321.38	68	23	210	23	1	338	749.29	23	0	1.283	0.818	1.06	1.662	0.36	-0.29	0.08	0.73	0.0180262	0.0253079	0.761481	0.00368773	0.209681	0.247881	0.988083	0.0676704	9.82509e+07	1.26085e+08	8.04084e+07	1.33641e+08	High	High	High	High	63
High	Master Protein	Q60598	Src substrate cortactin OS=Mus musculus OX=10090 GN=Cttn PE=1 SV=2	0	142.023	39	26	70	26	1	546	169	26	0	1.276	1.062	1.1	1.322	0.35	0.09	0.14	0.4	0.0207031	0.928883	0.981112	0.151106	0.235174	0.995494	0.999773	0.694923	8.67798e+06	1.10755e+07	9.21934e+06	1.21852e+07	High	High	High	High	64
High	Master Protein	Q99KI0	Aconitate hydratase, mitochondrial OS=Mus musculus OX=10090 GN=Aco2 PE=1 SV=1	0	697.295	63	54	398	54	1	780	1458.8	54	0	1.273	0.817	0.992	1.547	0.35	-0.29	-0.01	0.63	0.0221938	0.0240683	0.378332	0.0145769	0.247278	0.24143	0.91735	0.190121	9.36519e+07	1.19192e+08	7.64807e+07	1.18289e+08	High	High	High	High	65
High	Master Protein	Q4VAC9	Pleckstrin homology domain-containing family G member 3 OS=Mus musculus OX=10090 GN=Plekhg3 PE=1 SV=2	0.002	6.318	2	3	3	2	1	1341	2.77	3	0	1.269	1.08	1.042	1.225	0.34	0.11	0.06	0.29	0.00731436	0.861759	0.331733	0.096285	0.113441	0.994496	0.910819	0.57072	81994.6	104073	88532.4	108463	High	High	High	High	66
High	Master Protein	Q62241	U1 small nuclear ribonucleoprotein C OS=Mus musculus OX=10090 GN=Snrpc PE=1 SV=1	0.001	8.709	13	2	3	2	1	159	5.58	2	0	1.268	0.944	1.471	1.977	0.34	-0.08	0.56	0.98	0.00599549	0.211631	0.0322303	4.00459e-08	0.0974015	0.780287	0.311327	2.84082e-06	134076	170030	126507	250049	High	High	High	High	67
High	Master Protein	Q60972	Histone-binding protein RBBP4 OS=Mus musculus OX=10090 GN=Rbbp4 PE=1 SV=5	0	54.271	26	10	31	3	1	425	92.97	10	0	1.266	0.896	0.89	1.258	0.34	-0.16	-0.17	0.33	0.000514016	0.0564874	0.008572	0.0605031	0.0127214	0.420261	0.120986	0.464309	820679	1.03859e+06	735346	924738	High	High	High	High	68
High	Master Protein	P70372	ELAV-like protein 1 OS=Mus musculus OX=10090 GN=Elavl1 PE=1 SV=2	0	79.11	40	11	23	11	1	326	60.77	11	0	1.266	1.197	1.252	1.323	0.34	0.26	0.32	0.4	0.000272205	0.273212	0.311334	0.0148597	0.00736347	0.846403	0.900457	0.190815	2.81626e+06	3.56486e+06	3.37165e+06	4.46226e+06	High	High	High	High	69
High	Master Protein	Q9DAK9	14 kDa phosphohistidine phosphatase OS=Mus musculus OX=10090 GN=Phpt1 PE=1 SV=1	0	29.099	44	6	10	6	1	124	24.85	6	0	1.266	0.787	0.839	1.349	0.34	-0.35	-0.25	0.43	0.00799267	0.00670599	0.00409705	0.0194314	0.118967	0.0931798	0.0665484	0.229741	129952	164535	102304	138048	High	High	High	High	70
High	Master Protein	Q8BMF3	NADP-dependent malic enzyme, mitochondrial OS=Mus musculus OX=10090 GN=Me3 PE=1 SV=2	0	52.401	21	11	14	10	1	604	31.71	11	0	1.266	0.936	1.077	1.457	0.34	-0.1	0.11	0.54	0.00103153	0.119266	0.454886	0.00488943	0.0228112	0.621963	0.95666	0.0846483	613472	776811	574285	836714	High	High	High	High	71
High	Master Protein	O35459	Delta(3,5)-Delta(2,4)-dienoyl-CoA isomerase, mitochondrial OS=Mus musculus OX=10090 GN=Ech1 PE=1 SV=1	0	93.243	51	14	28	14	1	327	82.04	14	0	1.265	0.872	0.86	1.248	0.34	-0.2	-0.22	0.32	0.00399441	0.0132794	0.00731261	0.0673457	0.0703984	0.157032	0.107926	0.486135	4.71609e+06	5.96592e+06	4.11126e+06	5.12984e+06	High	High	High	High	72
High	Master Protein	P47934	Carnitine O-acetyltransferase OS=Mus musculus OX=10090 GN=Crat PE=1 SV=3	0	127.396	36	22	44	22	1	626	126.71	22	0	1.26	0.932	1.009	1.364	0.33	-0.1	0.01	0.45	0.00125942	0.0711465	0.255292	0.0079536	0.0266356	0.480198	0.861592	0.125044	3.5469e+06	4.46743e+06	3.30569e+06	4.5077e+06	High	High	High	High	73
High	Master Protein	Q64523	Histone H2A type 2-C OS=Mus musculus OX=10090 GN=H2ac20 PE=1 SV=3	0	81.119	46	10	83	3	1	129	216.57	10	2	1.258	1.099	0.726	0.831	0.33	0.14	-0.46	-0.27	0.0292406	0.663213	0.000294622	0.124675	0.294919	0.97492	0.00764833	0.63961	8.2072e+07	1.03277e+08	9.02373e+07	7.50141e+07	High	High	High	High	74
High	Master Protein	Q9CWI3	BRCA2 and CDKN1A-interacting protein OS=Mus musculus OX=10090 GN=Bccip PE=1 SV=1	0	9.459	9	3	3	3	1	316	5.23	3	0	1.258	1.628	1.118	0.864	0.33	0.7	0.16	-0.21	0.014644	0.00157779	0.545594	0.23045	0.18435	0.0284198	0.964415	0.796481	42285.3	53205.5	68838.2	59491.2	High	High	High	High	75
High	Master Protein	Q9CQ19	Myosin regulatory light polypeptide 9 OS=Mus musculus OX=10090 GN=Myl9 PE=1 SV=3	0	105.761	65	9	63	2	1	172	197.4	9	0	1.256	1.172	0.877	0.94	0.33	0.23	-0.19	-0.09	0.000720214	0.497135	0.00262389	0.501089	0.0170275	0.944906	0.0475324	0.953034	342131	429823	400950	377027	High	High	High	High	76
High	Master Protein	P62960	Y-box-binding protein 1 OS=Mus musculus OX=10090 GN=Ybx1 PE=1 SV=3	0	70.044	51	11	21	8	1	322	45.41	11	2	1.255	1.096	1.446	1.656	0.33	0.13	0.53	0.73	0.00137759	0.896247	0.0239871	8.31297e-06	0.0289877	0.995494	0.254071	0.00036087	654325	820941	716916	1.18714e+06	High	High	High	High	77
High	Master Protein	P97821	Dipeptidyl peptidase 1 OS=Mus musculus OX=10090 GN=Ctsc PE=1 SV=1	0	17.006	9	3	4	3	1	462	10.21	3	0	1.254	1.002	1.136	1.422	0.33	0	0.18	0.51	0.0076586	0.441299	0.766351	0.00753222	0.115395	0.926837	0.988083	0.120371	143313	179664	143575	204188	High	High	High	High	78
High	Master Protein	Q9JHI5	Isovaleryl-CoA dehydrogenase, mitochondrial OS=Mus musculus OX=10090 GN=Ivd PE=1 SV=1	0	229.935	50	24	119	24	1	424	338.25	24	0	1.253	0.91	1.046	1.44	0.33	-0.14	0.06	0.53	0.0324455	0.201215	0.674258	0.0470301	0.319836	0.765009	0.986902	0.396484	1.93768e+07	2.42766e+07	1.76297e+07	2.53913e+07	High	High	High	High	79
High	Master Protein	Q9JJL8	Serine--tRNA ligase, mitochondrial OS=Mus musculus OX=10090 GN=Sars2 PE=1 SV=2	0	22.649	12	5	7	5	1	518	14.24	5	0	1.251	1.112	0.951	1.07	0.32	0.15	-0.07	0.1	0.0112024	0.891714	0.0693036	0.623751	0.151625	0.995494	0.498146	0.96579	120829	151194	134315	143732	High	High	High	High	80
High	Master Protein	A2ALS5	Rap1 GTPase-activating protein 1 OS=Mus musculus OX=10090 GN=Rap1gap PE=1 SV=2	0	9.66	5	3	4	2	1	663	8.38	3	0	1.25	1.303	0.93	0.892	0.32	0.38	-0.11	-0.16	0.103926	0.497338	0.144211	0.682728	0.599634	0.944906	0.712441	0.970324	3587.17	4485.65	4674.64	4169.89	High	High	High	High	81
High	Master Protein	P29758	Ornithine aminotransferase, mitochondrial OS=Mus musculus OX=10090 GN=Oat PE=1 SV=1	0	138.589	53	21	57	21	1	439	171.65	21	0	1.249	0.928	1.019	1.372	0.32	-0.11	0.03	0.46	0.0346195	0.237169	0.489	0.0802158	0.332256	0.81359	0.957561	0.527866	7.14409e+06	8.92585e+06	6.63286e+06	9.09733e+06	High	High	High	High	82
High	Master Protein	P45952	Medium-chain specific acyl-CoA dehydrogenase, mitochondrial OS=Mus musculus OX=10090 GN=Acadm PE=1 SV=1	0	229.121	53	26	91	26	1	421	280.57	26	0	1.248	0.904	1.02	1.408	0.32	-0.15	0.03	0.49	0.0357566	0.182194	0.52283	0.0658699	0.337051	0.739711	0.960627	0.480662	1.59426e+07	1.9891e+07	1.44158e+07	2.02923e+07	High	High	High	High	83
High	Master Protein	Q3TVI8	Pre-B-cell leukemia transcription factor-interacting protein 1 OS=Mus musculus OX=10090 GN=Pbxip1 PE=1 SV=2	0	9.346	5	3	3	3	1	727	3.04	3	0	1.247	2.493	1.293	0.647	0.32	1.32	0.37	-0.63	0.102747	1.1314e-05	0.765754	0.0283473	0.596748	0.00037189	0.988083	0.291851	3722.44	4641.04	9279.32	6003.13	High	High	High	High	84
High	Master Protein	Q9D358	Low molecular weight phosphotyrosine protein phosphatase OS=Mus musculus OX=10090 GN=Acp1 PE=1 SV=3	0.001	8.463	17	3	3	3	1	158	6.11	3	0	1.247	1.028	1.122	1.362	0.32	0.04	0.17	0.45	0.000986167	0.608136	0.75063	0.0154765	0.0222308	0.97181	0.986902	0.194863	404156	503888	415271	565545	High	High	High	High	85
High	Master Protein	Q9DCW4	Electron transfer flavoprotein subunit beta OS=Mus musculus OX=10090 GN=Etfb PE=1 SV=3	0	203.271	80	21	127	21	1	255	423.59	21	0	1.245	0.92	1.018	1.377	0.32	-0.12	0.03	0.46	0.0376733	0.240574	0.512262	0.0892632	0.343968	0.818992	0.959125	0.557727	3.1747e+07	3.95203e+07	2.92201e+07	4.02426e+07	High	High	High	High	86
High	Master Protein	Q9JLZ3	Methylglutaconyl-CoA hydratase, mitochondrial OS=Mus musculus OX=10090 GN=Auh PE=1 SV=1	0	99.393	41	16	46	15	1	314	125.07	16	1	1.243	0.947	1.034	1.357	0.31	-0.08	0.05	0.44	0.038831	0.355126	0.601906	0.108378	0.349166	0.89871	0.970956	0.595914	9.13497e+06	1.13567e+07	8.65138e+06	1.17418e+07	High	High	High	High	87
High	Master Protein	Q8BL97	Serine/arginine-rich splicing factor 7 OS=Mus musculus OX=10090 GN=Srsf7 PE=1 SV=1	0	44.846	27	8	20	7	1	267	48.76	8	0	1.243	1.048	1.602	1.901	0.31	0.07	0.68	0.93	0.00116334	0.752876	0.000471743	2.79999e-09	0.0252462	0.98508	0.0114283	2.26216e-07	817788	1.01691e+06	856941	1.62901e+06	High	High	High	High	88
High	Master Protein	Q9DCL4	12S rRNA N4-methylcytidine methyltransferase OS=Mus musculus OX=10090 GN=Mettl15 PE=1 SV=2	0.002	6.522	7	2	2	2	1	406	3.67	2	0	1.241	1.554	1.063	0.849	0.31	0.64	0.09	-0.24	0.05347	0.0512929	0.437633	0.410632	0.419678	0.394217	0.952581	0.920105	8299.45	10302.7	12898.8	10955.3	High	High	High	High	89
High	Master Protein	Q9CZU6	Citrate synthase, mitochondrial OS=Mus musculus OX=10090 GN=Cs PE=1 SV=1	0	235.6	45	23	155	23	1	464	391.12	23	0	1.241	0.831	1.291	1.929	0.31	-0.27	0.37	0.95	0.0405796	0.035618	0.152681	0.000114276	0.35631	0.306094	0.725953	0.00361274	5.13517e+07	6.37182e+07	4.26597e+07	8.22892e+07	High	High	High	High	90
High	Master Protein	P62897	Cytochrome c, somatic OS=Mus musculus OX=10090 GN=Cycs PE=1 SV=2	0	136.928	66	12	70	12	1	105	237.91	12	0	1.235	0.862	1.217	1.743	0.3	-0.21	0.28	0.8	0.0453706	0.0775827	0.363627	0.00133958	0.379677	0.502786	0.916944	0.0298557	1.79698e+07	2.21873e+07	1.54934e+07	2.70002e+07	High	High	High	High	91
High	Master Protein	P97376	Protein FRG1 OS=Mus musculus OX=10090 GN=Frg1 PE=1 SV=2	0.003	5.714	7	2	2	2	1	258	4.54	2	0	1.233	1.108	0.817	0.909	0.3	0.15	-0.29	-0.14	0.0142332	0.967623	0.00288126	0.506173	0.179997	0.999773	0.0488519	0.954916	87281	107613	96730.5	87936.2	High	High	High	High	92
High	Master Protein	Q80V94	AP-4 complex subunit epsilon-1 OS=Mus musculus OX=10090 GN=Ap4e1 PE=1 SV=3	0.002	6.454	2	2	2	2	1	1122	2.28	2	0	1.232	0.849	0.975	1.414	0.3	-0.24	-0.04	0.5	0.109806	0.124709	0.218137	0.0733418	0.614862	0.63522	0.835713	0.506084	4436.67	5464.54	3768.47	5327.6	High	High	High	High	93
High	Master Protein	Q9DBL1	Short/branched chain specific acyl-CoA dehydrogenase, mitochondrial OS=Mus musculus OX=10090 GN=Acadsb PE=1 SV=1	0	250.124	53	22	104	22	1	432	336.02	22	0	1.231	0.993	1.043	1.292	0.3	-0.01	0.06	0.37	0.0488146	0.628133	0.657348	0.196206	0.398744	0.97492	0.985087	0.756349	2.17607e+07	2.67798e+07	2.16135e+07	2.79352e+07	High	High	High	High	94
High	Master Protein	P07724	Albumin OS=Mus musculus OX=10090 GN=Alb PE=1 SV=3	0	437.969	74	45	246	45	1	608	765.81	45	0	1.231	0.988	1.488	1.854	0.3	-0.02	0.57	0.89	0.0481137	0.594652	0.0075355	0.000311466	0.394126	0.968917	0.110654	0.0091505	3.77188e+07	4.64488e+07	3.72664e+07	6.91078e+07	High	High	High	High	95
High	Master Protein	Q8VCC1	15-hydroxyprostaglandin dehydrogenase [NAD(+)] OS=Mus musculus OX=10090 GN=Hpgd PE=1 SV=1	0	35.867	25	6	9	6	1	269	25.87	6	0	1.225	1.002	0.742	0.908	0.29	0	-0.43	-0.14	0.00188481	0.405641	1.20894e-06	0.350794	0.0379311	0.915547	5.24624e-05	0.888764	481668	590246	482678	438128	High	High	High	High	96
High	Master Protein	P42125	Enoyl-CoA delta isomerase 1, mitochondrial OS=Mus musculus OX=10090 GN=Eci1 PE=1 SV=2	0	143.866	60	14	77	14	1	289	244.75	14	0	1.222	0.946	1.051	1.358	0.29	-0.08	0.07	0.44	0.0568568	0.354708	0.707633	0.107382	0.433962	0.89871	0.986902	0.593199	1.14376e+07	1.39778e+07	1.08198e+07	1.46952e+07	High	High	High	High	97
High	Master Protein	P51174	Long-chain specific acyl-CoA dehydrogenase, mitochondrial OS=Mus musculus OX=10090 GN=Acadl PE=1 SV=2	0	244.911	43	22	113	22	1	430	355.96	22	0	1.221	0.827	1.025	1.513	0.29	-0.27	0.04	0.6	0.0574906	0.032399	0.548475	0.021339	0.437079	0.288664	0.964415	0.24339	2.09159e+07	2.55479e+07	1.73024e+07	2.61792e+07	High	High	High	High	98
High	Master Protein	P83870	PHD finger-like domain-containing protein 5A OS=Mus musculus OX=10090 GN=Phf5a PE=1 SV=1	0	32.592	63	7	11	7	1	110	24.28	7	0	1.22	1.101	1.133	1.256	0.29	0.14	0.18	0.33	0.00363986	0.860697	0.853245	0.0395691	0.0659484	0.994496	0.990777	0.355206	943455	1.15138e+06	1.03882e+06	1.30465e+06	High	High	High	High	99
High	Master Protein	Q3TLP5	Enoyl-CoA hydratase domain-containing protein 2, mitochondrial OS=Mus musculus OX=10090 GN=Echdc2 PE=1 SV=2	0	85.341	45	10	24	10	1	296	88.06	10	0	1.22	1.013	1.062	1.279	0.29	0.02	0.09	0.35	0.00224693	0.379162	0.451728	0.0357336	0.0440005	0.905172	0.955524	0.334184	2.31067e+06	2.8191e+06	2.34003e+06	2.99278e+06	High	High	High	High	100
High	Master Protein	Q99PU8	ATP-dependent RNA helicase DHX30 OS=Mus musculus OX=10090 GN=Dhx30 PE=1 SV=1	0	27.175	6	7	7	7	1	1217	16.67	7	0	1.219	1.229	1.563	1.55	0.29	0.3	0.64	0.63	0.0205979	0.291364	0.00646235	0.000340673	0.234437	0.861992	0.096603	0.00976204	130037	158573	159859	247775	High	High	High	High	101
High	Master Protein	O08749	Dihydrolipoyl dehydrogenase, mitochondrial OS=Mus musculus OX=10090 GN=Dld PE=1 SV=2	0	271.257	48	22	144	22	1	509	489.74	22	0	1.218	0.973	1.089	1.365	0.28	-0.04	0.12	0.45	0.0608119	0.499799	0.950245	0.10084	0.452279	0.944906	0.996515	0.579632	3.58778e+07	4.37086e+07	3.4893e+07	4.76187e+07	High	High	High	High	102
High	Master Protein	Q9CQE1	Protein NipSnap homolog 3B OS=Mus musculus OX=10090 GN=Nipsnap3b PE=1 SV=1	0	70.909	44	9	26	9	1	247	79.51	9	0	1.217	0.899	1.006	1.361	0.28	-0.15	0.01	0.44	0.0038461	0.0198983	0.229145	0.00771401	0.0686164	0.210106	0.845195	0.121728	3.50401e+06	4.2646e+06	3.15166e+06	4.28897e+06	High	High	High	High	103
High	Master Protein	P97807	Fumarate hydratase, mitochondrial OS=Mus musculus OX=10090 GN=Fh PE=1 SV=3	0	494.459	65	28	201	28	1	507	686.93	28	0	1.217	0.831	1.013	1.484	0.28	-0.27	0.02	0.57	0.0617962	0.0357392	0.482268	0.0294531	0.455311	0.306682	0.957561	0.297642	3.2616e+07	3.9705e+07	2.70994e+07	4.02131e+07	High	High	High	High	104
High	Master Protein	Q3UGR5	Haloacid dehalogenase-like hydrolase domain-containing protein 2 OS=Mus musculus OX=10090 GN=Hdhd2 PE=1 SV=2	0	23.086	27	6	7	6	1	259	16.49	6	0	1.216	1.409	0.973	0.84	0.28	0.49	-0.04	-0.25	0.00418996	0.00902711	0.0683525	0.114292	0.0730214	0.118555	0.495598	0.613885	502646	611083	708374	594869	High	High	High	High	105
High	Master Protein	Q921I9	Exosome complex component RRP41 OS=Mus musculus OX=10090 GN=Exosc4 PE=1 SV=3	0	21.489	18	3	3	3	1	245	11.71	3	0	1.215	0.932	0.912	1.189	0.28	-0.1	-0.13	0.25	0.017739	0.174379	0.0279526	0.191472	0.208013	0.728973	0.28065	0.748565	140644	170892	131130	155878	High	High	High	High	106
High	Master Protein	P83887	Tubulin gamma-1 chain OS=Mus musculus OX=10090 GN=Tubg1 PE=1 SV=1	0	12.938	9	2	2	2	1	451	7.94	2	0	1.21	1.435	1.007	0.85	0.28	0.52	0.01	-0.24	0.0381979	0.0625721	0.125331	0.225502	0.345873	0.444499	0.667579	0.7902	29779.2	36046.2	42735.5	36308.5	High	High	High	High	107
High	Master Protein	P55302	Alpha-2-macroglobulin receptor-associated protein OS=Mus musculus OX=10090 GN=Lrpap1 PE=1 SV=1	0	54.225	36	16	19	16	1	360	32.91	16	0	1.207	0.921	1.086	1.423	0.27	-0.12	0.12	0.51	0.00297215	0.0479796	0.49371	0.000793412	0.055582	0.376013	0.957561	0.0196395	1.69826e+06	2.05045e+06	1.56472e+06	2.22641e+06	High	High	High	High	108
High	Master Protein	Q91XA9	Acidic mammalian chitinase OS=Mus musculus OX=10090 GN=Chia PE=1 SV=2	0	93.208	35	12	37	12	1	473	114.6	12	0	1.206	1.752	0.781	0.537	0.27	0.81	-0.36	-0.9	0.00523425	1.51633e-07	0.000109979	3.06873e-07	0.0877303	7.11452e-06	0.00324633	1.85946e-05	3.38261e+06	4.07826e+06	5.92483e+06	3.18459e+06	High	High	High	High	109
High	Master Protein	Q9D023	Mitochondrial pyruvate carrier 2 OS=Mus musculus OX=10090 GN=Mpc2 PE=1 SV=1	0	72.513	50	6	46	6	1	127	90.38	6	0	1.206	1.035	0.954	1.112	0.27	0.05	-0.07	0.15	0.0748896	0.909303	0.21921	0.742604	0.505483	0.995494	0.836421	0.977575	1.08736e+07	1.31158e+07	1.12512e+07	1.25108e+07	High	High	High	High	110
High	Master Protein	Q8K4Z3	NAD(P)H-hydrate epimerase OS=Mus musculus OX=10090 GN=Naxe PE=1 SV=1	0	34.279	30	6	11	6	1	282	40.89	6	0	1.206	1.054	1.08	1.236	0.27	0.08	0.11	0.31	0.00791329	0.810186	0.486182	0.0774453	0.118313	0.991263	0.957561	0.518578	716162	863715	754953	932762	High	High	High	High	111
High	Master Protein	Q9D051	Pyruvate dehydrogenase E1 component subunit beta, mitochondrial OS=Mus musculus OX=10090 GN=Pdhb PE=1 SV=1	0	250.009	47	13	123	13	1	359	365.34	13	0	1.206	0.985	1.052	1.288	0.27	-0.02	0.07	0.37	0.0750956	0.574256	0.712291	0.203195	0.505483	0.965076	0.986902	0.763065	2.42323e+07	2.92253e+07	2.38633e+07	3.07472e+07	High	High	High	High	112
High	Master Protein	P56959	RNA-binding protein FUS OS=Mus musculus OX=10090 GN=Fus PE=1 SV=1	0	43.258	12	6	11	6	1	518	39.1	6	0	1.206	1.091	1.58	1.746	0.27	0.13	0.66	0.8	0.00291865	0.999424	0.00029035	7.52649e-08	0.055582	0.999773	0.00760534	5.03237e-06	1.18394e+06	1.42729e+06	1.29141e+06	2.25453e+06	High	High	High	High	113
High	Master Protein	Q9D824	Pre-mRNA 3'-end-processing factor FIP1 OS=Mus musculus OX=10090 GN=Fip1l1 PE=1 SV=1	0	35.168	16	7	8	7	1	581	15.46	7	0	1.205	1.01	1.129	1.347	0.27	0.02	0.18	0.43	0.00734989	0.432151	0.79105	0.0289517	0.113689	0.924174	0.990777	0.297023	603725	727487	610043	821561	High	High	High	High	114
High	Master Protein	Q91VM5	RNA binding motif protein, X-linked-like-1 OS=Mus musculus OX=10090 GN=Rbmxl1 PE=2 SV=1	0	90.895	44	20	54	5	1	388	123.57	20	15	1.205	1.066	1.223	1.383	0.27	0.09	0.29	0.47	0.0577059	0.992877	0.34699	0.0723004	0.437947	0.999773	0.911286	0.501277	6.65592e+06	8.0215e+06	7.092e+06	9.81068e+06	High	High	High	High	115
High	Master Protein	Q9CYR0	Single-stranded DNA-binding protein, mitochondrial OS=Mus musculus OX=10090 GN=Ssbp1 PE=1 SV=1	0	46.265	43	7	20	7	1	152	47.03	7	0	1.204	1.052	1.04	1.191	0.27	0.07	0.06	0.25	0.00531696	0.652528	0.238737	0.0937953	0.0886058	0.97492	0.853259	0.566883	1.5427e+06	1.85754e+06	1.62261e+06	1.93212e+06	High	High	High	High	116
High	Master Protein	P62305	Small nuclear ribonucleoprotein E OS=Mus musculus OX=10090 GN=Snrpe PE=1 SV=1	0	12.822	25	2	4	2	1	92	12.83	2	0	1.198	1.182	1.278	1.295	0.26	0.24	0.35	0.37	0.0137175	0.415775	0.390552	0.0378751	0.174958	0.918636	0.927341	0.343318	212223	254277	250844	324866	High	High	High	High	117
High	Master Protein	Q61937	Nucleophosmin OS=Mus musculus OX=10090 GN=Npm1 PE=1 SV=1	0	131.249	49	16	61	16	1	292	169.51	16	0	1.197	1.03	1.12	1.302	0.26	0.04	0.16	0.38	0.0871944	0.875494	0.857496	0.180618	0.542958	0.995494	0.990777	0.735753	1.42457e+07	1.70548e+07	1.4671e+07	1.90999e+07	High	High	High	High	118
High	Master Protein	P20108	Thioredoxin-dependent peroxide reductase, mitochondrial OS=Mus musculus OX=10090 GN=Prdx3 PE=1 SV=1	0	109.614	44	11	44	11	1	257	163.02	11	0	1.197	0.965	1.058	1.313	0.26	-0.05	0.08	0.39	0.0871447	0.441369	0.750559	0.162808	0.542958	0.926837	0.986902	0.714217	8.83578e+06	1.05784e+07	8.52235e+06	1.1194e+07	High	High	High	High	119
High	Master Protein	Q505D7	Optic atrophy 3 protein homolog OS=Mus musculus OX=10090 GN=Opa3 PE=1 SV=1	0	13.459	15	3	6	2	1	179	18.53	3	0	1.195	0.957	1.03	1.285	0.26	-0.06	0.04	0.36	0.00922466	0.177902	0.23783	0.0566978	0.133792	0.732527	0.852557	0.446294	587075	701459	562010	722170	High	High	High	High	120
High	Master Protein	Q8R0N6	Hydroxyacid-oxoacid transhydrogenase, mitochondrial OS=Mus musculus OX=10090 GN=Adhfe1 PE=1 SV=2	0	22.69	8	3	6	3	1	465	12.58	3	0	1.195	0.988	1.065	1.29	0.26	-0.02	0.09	0.37	0.0328742	0.378185	0.401163	0.060883	0.322277	0.904836	0.933774	0.465995	133450	159524	131791	169952	High	High	High	High	121
High	Master Protein	P62317	Small nuclear ribonucleoprotein Sm D2 OS=Mus musculus OX=10090 GN=Snrpd2 PE=1 SV=1	0	50.583	54	7	25	7	1	118	62.63	7	0	1.195	1.05	1.373	1.562	0.26	0.07	0.46	0.64	0.00579316	0.645082	0.0593292	7.05137e-05	0.0946433	0.97492	0.456827	0.00233056	1.64631e+06	1.96765e+06	1.72872e+06	2.70112e+06	High	High	High	High	122
Medium	Master Protein	Q80W00	Serine/threonine-protein phosphatase 1 regulatory subunit 10 OS=Mus musculus OX=10090 GN=Ppp1r10 PE=1 SV=1	0.019	3.154	2	2	2	2	1	888	1.86	2	0	1.194	1.734	1.226	0.844	0.26	0.79	0.29	-0.24	0.0887183	0.00767607	0.95984	0.355605	0.551515	0.104018	0.996618	0.889701	8857.64	10573.6	15361.1	12965.2	High	High	High	High	123
High	Master Protein	Q9JJK5	Homocysteine-responsive endoplasmic reticulum-resident ubiquitin-like domain member 1 protein OS=Mus musculus OX=10090 GN=Herpud1 PE=1 SV=1	0.001	8.946	8	2	3	2	1	391	4.46	2	0	1.194	1.26	1.058	1.003	0.26	0.33	0.08	0	0.0837796	0.505885	0.428811	0.879263	0.530227	0.944976	0.948412	0.995594	9288.61	11087.6	11700.1	11732.8	High	High	High	High	124
Medium	Master Protein	Q8BPE4	Transmembrane protein 177 OS=Mus musculus OX=10090 GN=Tmem177 PE=1 SV=1	0.034	2.499	6	2	2	2	1	311	5.03	2	0	1.193	1.11	1.088	1.17	0.25	0.15	0.12	0.23	0.0231164	0.886087	0.486841	0.228305	0.255598	0.995494	0.957561	0.792392	157211	187577	174547	204164	High	High	High	High	125
High	Master Protein	O08583	THO complex subunit 4 OS=Mus musculus OX=10090 GN=Alyref PE=1 SV=3	0	46.931	34	5	12	5	1	255	44.28	5	0	1.193	1.005	1.29	1.531	0.25	0.01	0.37	0.61	0.00414608	0.319061	0.221877	0.000148525	0.0728507	0.885306	0.838892	0.00457128	1.75391e+06	2.0922e+06	1.7631e+06	2.69986e+06	High	High	High	High	126
High	Master Protein	P49935	Pro-cathepsin H OS=Mus musculus OX=10090 GN=Ctsh PE=1 SV=2	0	24.584	18	5	5	5	1	333	13.62	5	0	1.192	1.106	1.075	1.158	0.25	0.15	0.1	0.21	0.0119064	0.865287	0.377861	0.258211	0.159189	0.995494	0.91735	0.831517	262700	313129	290605	336498	High	High	High	High	127
High	Master Protein	Q91VC9	Growth hormone-inducible transmembrane protein OS=Mus musculus OX=10090 GN=Ghitm PE=1 SV=1	0	81.222	21	7	29	7	1	346	67.68	7	0	1.191	0.993	0.972	1.166	0.25	-0.01	-0.04	0.22	0.0125356	0.288694	0.125291	0.177696	0.164789	0.860125	0.667579	0.731751	3.74245e+06	4.45598e+06	3.71482e+06	4.33273e+06	High	High	High	High	128
High	Master Protein	Q8BTI8	Serine/arginine repetitive matrix protein 2 OS=Mus musculus OX=10090 GN=Srrm2 PE=1 SV=3	0	29.524	3	7	7	7	1	2703	15.66	7	0	1.191	0.92	1.305	1.69	0.25	-0.12	0.38	0.76	0.00652503	0.0945181	0.189035	3.1255e-05	0.103124	0.558281	0.78632	0.00112926	378270	450558	348065	588174	High	High	High	High	129
High	Master Protein	Q8BWF0	Succinate-semialdehyde dehydrogenase, mitochondrial OS=Mus musculus OX=10090 GN=Aldh5a1 PE=1 SV=1	0	90.599	35	14	29	14	1	523	88.31	14	0	1.189	0.949	1.032	1.292	0.25	-0.08	0.05	0.37	0.00714189	0.102952	0.295606	0.0316644	0.111659	0.581529	0.887903	0.310611	2.38264e+06	2.83189e+06	2.2611e+06	2.92168e+06	High	High	High	High	130
High	Master Protein	Q8C854	Myelin expression factor 2 OS=Mus musculus OX=10090 GN=Myef2 PE=1 SV=1	0	15.906	8	5	7	5	1	591	5.17	5	0	1.188	1.238	1.265	1.213	0.25	0.31	0.34	0.28	0.0363319	0.32313	0.533336	0.143008	0.338564	0.888987	0.963215	0.682624	104209	123767	129015	156542	High	High	High	High	131
High	Master Protein	Q7TMK9	Heterogeneous nuclear ribonucleoprotein Q OS=Mus musculus OX=10090 GN=Syncrip PE=1 SV=2	0	153.985	37	24	50	24	1	623	127.72	24	0	1.188	1.21	1.415	1.39	0.25	0.27	0.5	0.47	0.00605593	0.219104	0.0254183	0.00378622	0.0978369	0.78259	0.265812	0.069042	2.73277e+06	3.24693e+06	3.30545e+06	4.5933e+06	High	High	High	High	132
High	Master Protein	P43274	Histone H1.4 OS=Mus musculus OX=10090 GN=H1-4 PE=1 SV=2	0	197.882	46	21	130	7	1	219	365.68	21	0	1.186	1.201	0.832	0.821	0.25	0.26	-0.27	-0.28	0.105627	0.217553	0.0151642	0.10694	0.602916	0.78259	0.181985	0.591811	2.14111e+07	2.53836e+07	2.571e+07	2.11185e+07	High	High	High	High	133
High	Master Protein	Q9D898	Actin-related protein 2/3 complex subunit 5-like protein OS=Mus musculus OX=10090 GN=Arpc5l PE=1 SV=1	0	41.484	47	7	18	7	1	153	54.82	7	0	1.186	1.093	1.08	1.171	0.25	0.13	0.11	0.23	0.00607585	0.986201	0.491062	0.161984	0.0978867	0.999773	0.957561	0.712755	1.8903e+06	2.24101e+06	2.06582e+06	2.4201e+06	High	High	High	High	134
High	Master Protein	Q5SWD9	Pre-rRNA-processing protein TSR1 homolog OS=Mus musculus OX=10090 GN=Tsr1 PE=1 SV=1	0	19.009	7	5	8	5	1	803	9.94	5	0	1.185	1.041	1.067	1.216	0.25	0.06	0.09	0.28	0.0249524	0.634648	0.381434	0.127183	0.266281	0.97492	0.91887	0.640541	165422	196077	172156	209262	High	High	High	High	135
High	Master Protein	Q9CXY6	Interleukin enhancer-binding factor 2 OS=Mus musculus OX=10090 GN=Ilf2 PE=1 SV=1	0	68.752	28	10	19	10	1	390	60.1	10	0	1.184	1.183	1.22	1.22	0.24	0.24	0.29	0.29	0.00819481	0.328124	0.51527	0.0715264	0.120661	0.894459	0.959232	0.498884	1.62652e+06	1.92536e+06	1.92404e+06	2.34801e+06	High	High	High	High	136
High	Master Protein	O35887	Calumenin OS=Mus musculus OX=10090 GN=Calu PE=1 SV=1	0	70.461	40	13	26	13	1	315	75.39	13	0	1.184	0.989	1.045	1.25	0.24	-0.02	0.06	0.32	0.0107232	0.254849	0.251003	0.044799	0.149201	0.8319	0.858863	0.387946	1.38521e+06	1.6395e+06	1.37021e+06	1.71323e+06	High	High	High	High	137
High	Master Protein	P62996	Transformer-2 protein homolog beta OS=Mus musculus OX=10090 GN=Tra2b PE=1 SV=1	0	25.676	18	6	13	4	1	288	33.09	6	0	1.184	1.057	1.332	1.492	0.24	0.08	0.41	0.58	0.00650537	0.70148	0.114949	0.000324824	0.103093	0.98508	0.644079	0.0094005	1.67907e+06	1.98866e+06	1.77516e+06	2.64794e+06	High	High	High	High	138
High	Master Protein	Q8K2Z4	Condensin complex subunit 1 OS=Mus musculus OX=10090 GN=Ncapd2 PE=1 SV=2	0	30.889	6	7	9	7	1	1392	17.36	7	0	1.183	1.555	1.262	0.96	0.24	0.64	0.34	-0.06	0.0511413	0.00348741	0.554044	0.80195	0.413108	0.0554365	0.964415	0.986585	74663.5	88299.5	116074	111427	High	High	High	High	139
High	Master Protein	Q8R1Z9	RING finger protein 121 OS=Mus musculus OX=10090 GN=Rnf121 PE=1 SV=1	0	9.878	10	4	5	4	1	327	5.99	4	0	1.182	1.11	0.955	1.017	0.24	0.15	-0.07	0.02	0.00983526	0.909369	0.0449049	0.978093	0.140201	0.995494	0.381711	0.999848	504717	596628	560169	569885	High	High	High	High	140
High	Master Protein	Q8C5Q4	G-rich sequence factor 1 OS=Mus musculus OX=10090 GN=Grsf1 PE=1 SV=2	0	13.29	9	3	3	3	1	479	9.02	3	0	1.18	1.348	0.951	0.833	0.24	0.43	-0.07	-0.26	0.016497	0.0445457	0.0391954	0.0827686	0.198141	0.36146	0.357244	0.534961	263526	311042	355167	295943	High	High	High	High	141
High	Master Protein	Q60714	Long-chain fatty acid transport protein 1 OS=Mus musculus OX=10090 GN=Slc27a1 PE=1 SV=1	0	14.393	9	5	5	4	1	646	12.73	5	0	1.179	1.026	0.926	1.064	0.24	0.04	-0.11	0.09	0.0359345	0.554763	0.0386718	0.671957	0.337089	0.958912	0.355482	0.970324	155017	182691	159056	169219	High	High	High	High	142
High	Master Protein	Q9CQE2	Transmembrane protein 223 OS=Mus musculus OX=10090 GN=Tmem223 PE=2 SV=1	0.009	4.344	9	2	2	2	1	199	4.54	2	0	1.179	1.085	1.042	1.132	0.24	0.12	0.06	0.18	0.0434064	0.88995	0.320335	0.297494	0.369622	0.995494	0.905342	0.866188	81810.6	96424.5	88767.4	100472	High	High	High	High	143
High	Master Protein	Q61070	Etoposide-induced protein 2.4 OS=Mus musculus OX=10090 GN=Ei24 PE=1 SV=3	0	12.623	9	3	4	3	1	340	6.98	3	0	1.178	1.004	0.806	0.945	0.24	0.01	-0.31	-0.08	0.0108259	0.391828	0.000228385	0.461113	0.149913	0.909302	0.0061201	0.935831	1.02533e+06	1.20733e+06	1.02946e+06	972985	High	High	High	High	144
High	Master Protein	Q9Z0J0	NPC intracellular cholesterol transporter 2 OS=Mus musculus OX=10090 GN=Npc2 PE=1 SV=1	0	28.387	30	4	7	4	1	149	24.83	4	0	1.178	1.018	1.019	1.179	0.24	0.03	0.03	0.24	0.00761055	0.464147	0.198903	0.141262	0.115078	0.931163	0.802564	0.679696	1.06637e+06	1.25594e+06	1.08568e+06	1.28034e+06	High	High	High	High	145
High	Master Protein	Q61624	Zinc finger protein 148 OS=Mus musculus OX=10090 GN=Znf148 PE=1 SV=2	0.001	8.815	4	3	4	3	1	794	0	3	0	1.176	1.331	1.102	0.973	0.23	0.41	0.14	-0.04	0.056404	0.215159	0.440129	0.841779	0.433047	0.78259	0.954324	0.993432	20861.9	24525.7	27775.8	27020.2	High	High	High	High	146
High	Master Protein	O35855	Branched-chain-amino-acid aminotransferase, mitochondrial OS=Mus musculus OX=10090 GN=Bcat2 PE=1 SV=2	0	203.05	45	20	93	20	1	393	335.14	20	0	1.176	0.877	0.904	1.212	0.23	-0.19	-0.15	0.28	0.122321	0.108276	0.0886663	0.379774	0.647818	0.597429	0.567867	0.909114	3.22944e+07	3.79906e+07	2.83372e+07	3.43333e+07	High	High	High	High	147
High	Master Protein	Q99L13	3-hydroxyisobutyrate dehydrogenase, mitochondrial OS=Mus musculus OX=10090 GN=Hibadh PE=1 SV=1	0	258.01	61	19	95	19	1	335	318.26	19	0	1.176	0.943	0.985	1.229	0.23	-0.08	-0.02	0.3	0.123401	0.319496	0.344706	0.305103	0.648653	0.885429	0.911286	0.870663	8.2647e+06	9.71785e+06	7.79255e+06	9.57422e+06	High	High	High	High	148
High	Master Protein	Q9D6F9	Tubulin beta-4A chain OS=Mus musculus OX=10090 GN=Tubb4a PE=1 SV=3	0	392.579	65	23	287	2	1	444	849.53	23	0	1.175	1.427	1.014	0.835	0.23	0.51	0.02	-0.26	0.0540984	0.054538	0.133205	0.172169	0.422899	0.408368	0.684264	0.722841	38449.5	45170.3	54850.1	45799.2	High	High	High	High	149
High	Master Protein	Q07417	Short-chain specific acyl-CoA dehydrogenase, mitochondrial OS=Mus musculus OX=10090 GN=Acads PE=1 SV=2	0	260.087	66	22	106	22	1	412	365.79	22	0	1.175	0.895	1.102	1.446	0.23	-0.16	0.14	0.53	0.125656	0.154873	0.969757	0.0444329	0.656029	0.699504	0.998629	0.386551	1.08454e+07	1.27399e+07	9.71131e+06	1.40391e+07	High	High	High	High	150
High	Master Protein	Q80YQ2	Mediator of RNA polymerase II transcription subunit 23 OS=Mus musculus OX=10090 GN=Med23 PE=1 SV=2	0	10.177	3	4	4	4	1	1367	3.47	4	0	1.174	1.257	0.993	0.928	0.23	0.33	-0.01	-0.11	0.0607775	0.301608	0.12727	0.564379	0.452279	0.873013	0.671574	0.96579	69566.9	81698.6	87430.2	81107.4	High	High	High	High	151
High	Master Protein	P00158	Cytochrome b OS=Mus musculus OX=10090 GN=Mt-Cyb PE=1 SV=1	0	9.173	4	2	4	2	1	381	10.77	2	0	1.173	1.088	1.161	1.251	0.23	0.12	0.22	0.32	0.0105181	0.949428	0.79593	0.0517027	0.147761	0.996711	0.990777	0.420048	2.86726e+06	3.36255e+06	3.12049e+06	3.90295e+06	High	High	High	High	152
High	Master Protein	Q9EPR2	Group XIIA secretory phospholipase A2 OS=Mus musculus OX=10090 GN=Pla2g12a PE=1 SV=2	0.003	5.895	13	3	4	3	1	192	7.49	3	0	1.173	1.051	1.123	1.253	0.23	0.07	0.17	0.33	0.0473708	0.737311	0.696288	0.0973163	0.391492	0.98508	0.986902	0.575294	139212	163228	146302	183270	High	High	High	High	153
High	Master Protein	Q8VIK2	Mpv17-like protein 2 OS=Mus musculus OX=10090 GN=Mpv17l2 PE=1 SV=1	0	18.399	18	2	5	2	1	200	13.13	2	0	1.172	1.287	1.017	0.926	0.23	0.36	0.02	-0.11	0.0774505	0.302056	0.151531	0.579993	0.508411	0.873013	0.723441	0.96579	26564.3	31125.1	34184.2	31661.2	High	High	High	High	154
High	Master Protein	O89023	Tripeptidyl-peptidase 1 OS=Mus musculus OX=10090 GN=Tpp1 PE=1 SV=2	0	26.999	9	3	5	3	1	562	19.72	3	0	1.172	0.95	0.971	1.198	0.23	-0.07	-0.04	0.26	0.0181138	0.199129	0.0795247	0.165233	0.21028	0.764204	0.536469	0.717885	747498	875840	710158	850823	High	High	High	High	155
High	Master Protein	P23780	Beta-galactosidase OS=Mus musculus OX=10090 GN=Glb1 PE=1 SV=1	0	37.278	17	10	11	10	1	647	20.31	10	0	1.171	0.947	1.045	1.293	0.23	-0.08	0.06	0.37	0.0171685	0.140438	0.314179	0.04558	0.203179	0.667541	0.901141	0.38991	577039	675987	546264	706129	High	High	High	High	156
High	Master Protein	C0HKD9	Microfibrillar-associated protein 1B OS=Mus musculus OX=10090 GN=Mfap1b PE=1 SV=1	0	22.421	15	6	7	5	1	439	12.35	6	0	1.17	1.169	1.198	1.199	0.23	0.22	0.26	0.26	0.0109417	0.516695	0.774959	0.170679	0.150087	0.95004	0.989883	0.722841	354451	414566	414253	496516	High	High	High	High	157
High	Master Protein	P16675	Lysosomal protective protein OS=Mus musculus OX=10090 GN=Ctsa PE=1 SV=1	0	46.357	15	6	9	6	1	474	31	6	0	1.17	0.967	1.066	1.291	0.23	-0.05	0.09	0.37	0.0183644	0.241167	0.397495	0.0657241	0.212764	0.819496	0.932595	0.480514	644235	753976	622762	803715	High	High	High	High	158
High	Master Protein	Q9D172	Glutamine amidotransferase-like class 1 domain-containing protein 3, mitochondrial OS=Mus musculus OX=10090 GN=Gatd3 PE=1 SV=1	0	213.854	62	15	90	15	1	266	343.95	15	0	1.17	0.914	1.054	1.349	0.23	-0.13	0.08	0.43	0.135121	0.217419	0.725424	0.1172	0.680991	0.78259	0.986902	0.624888	2.14954e+07	2.51506e+07	1.9654e+07	2.65133e+07	High	High	High	High	159
High	Master Protein	O70400	PDZ and LIM domain protein 1 OS=Mus musculus OX=10090 GN=Pdlim1 PE=1 SV=4	0	66.27	43	9	17	9	1	327	54.82	9	0	1.169	1.04	0.914	1.027	0.23	0.06	-0.13	0.04	0.0127018	0.624106	0.0177205	0.908742	0.16546	0.97492	0.203844	0.995678	1.04833e+06	1.22552e+06	1.09072e+06	1.1199e+06	High	High	High	High	160
High	Master Protein	Q8R0F8	Acylpyruvase FAHD1, mitochondrial OS=Mus musculus OX=10090 GN=Fahd1 PE=1 SV=2	0	45.03	59	11	19	11	1	227	37.97	11	0	1.168	0.937	1.075	1.34	0.22	-0.09	0.1	0.42	0.0154237	0.0731493	0.432179	0.00571141	0.190455	0.489176	0.951578	0.0954691	1.31233e+06	1.53335e+06	1.23008e+06	1.64865e+06	High	High	High	High	161
High	Master Protein	P21107	Tropomyosin alpha-3 chain OS=Mus musculus OX=10090 GN=Tpm3 PE=1 SV=3	0	175.103	45	30	108	12	1	285	238.96	30	0	1.167	0.978	1.055	1.26	0.22	-0.03	0.08	0.33	0.0270145	0.214373	0.4926	0.0457688	0.28195	0.78259	0.957561	0.390377	3.8433e+06	4.48605e+06	3.75692e+06	4.73202e+06	High	High	High	High	162
High	Master Protein	O55060	Thiopurine S-methyltransferase OS=Mus musculus OX=10090 GN=Tpmt PE=1 SV=1	0	55.181	46	11	18	11	1	240	46.37	11	0	1.167	1.085	1.188	1.278	0.22	0.12	0.25	0.35	0.0209559	0.989451	0.803125	0.0401673	0.237582	0.999773	0.990777	0.358914	668856	780717	725398	927244	High	High	High	High	163
High	Master Protein	Q9CX86	Heterogeneous nuclear ribonucleoprotein A0 OS=Mus musculus OX=10090 GN=Hnrnpa0 PE=1 SV=1	0	90.227	44	11	28	9	1	305	69.06	11	0	1.167	0.971	1.251	1.502	0.22	-0.04	0.32	0.59	0.0136952	0.17472	0.326825	0.000451141	0.174958	0.728973	0.909322	0.0125564	2.4441e+06	2.85116e+06	2.37441e+06	3.56584e+06	High	High	High	High	164
High	Master Protein	Q8BGF7	PAN2-PAN3 deadenylation complex catalytic subunit Pan2 OS=Mus musculus OX=10090 GN=Pan2 PE=1 SV=1	0.002	6.216	3	2	2	2	1	1200	2.94	2	0	1.166	1.152	1.247	1.262	0.22	0.2	0.32	0.34	0.121251	0.920327	0.882699	0.144808	0.645666	0.995494	0.990777	0.685952	8475.38	9881.88	9766.05	12326.4	High	High	High	High	165
High	Master Protein	Q60865	Caprin-1 OS=Mus musculus OX=10090 GN=Caprin1 PE=1 SV=2	0	39.537	12	8	11	8	1	707	26.96	8	0	1.164	0.969	1.032	1.24	0.22	-0.04	0.05	0.31	0.0125945	0.180847	0.252465	0.0566442	0.164789	0.738365	0.858863	0.446294	1.1618e+06	1.3526e+06	1.12618e+06	1.39606e+06	High	High	High	High	166
High	Master Protein	Q9WVJ3	Carboxypeptidase Q OS=Mus musculus OX=10090 GN=Cpq PE=1 SV=1	0.003	5.917	3	2	2	2	1	470	5.35	2	0	1.164	0.923	1.164	1.469	0.22	-0.12	0.22	0.55	0.0131719	0.139732	0.976113	0.00109125	0.169112	0.667306	0.999773	0.0255867	350221	407798	323302	474770	High	High	High	High	167
High	Master Protein	Q9D0D5	General transcription factor IIE subunit 1 OS=Mus musculus OX=10090 GN=Gtf2e1 PE=1 SV=1	0.002	6.595	7	2	2	2	1	440	0	2	0	1.162	1.315	0.897	0.793	0.22	0.4	-0.16	-0.34	0.0860304	0.302693	0.0442774	0.158717	0.539908	0.873013	0.378081	0.706391	15811.9	18372.8	20798.5	16488.3	High	High	High	High	168
High	Master Protein	P61358	60S ribosomal protein L27 OS=Mus musculus OX=10090 GN=Rpl27 PE=1 SV=2	0	60.672	64	11	34	10	1	136	90.57	11	0	1.162	1.344	1.269	1.097	0.22	0.43	0.34	0.13	0.0283294	0.0181716	0.231733	0.517709	0.288553	0.19542	0.845195	0.958043	4.2204e+06	4.9052e+06	5.67168e+06	6.22247e+06	High	High	High	High	169
High	Master Protein	P70279	Surfeit locus protein 6 OS=Mus musculus OX=10090 GN=Surf6 PE=1 SV=1	0	23.422	16	6	8	6	1	355	11.46	6	0	1.161	1.191	1.108	1.08	0.22	0.25	0.15	0.11	0.0237472	0.33565	0.672189	0.597837	0.260592	0.896637	0.986902	0.96579	680922	790786	811155	876443	High	High	High	High	170
High	Master Protein	P17742	Peptidyl-prolyl cis-trans isomerase A OS=Mus musculus OX=10090 GN=Ppia PE=1 SV=2	0	165.053	76	17	85	15	1	164	242.56	17	1	1.161	0.932	1.215	1.513	0.22	-0.1	0.28	0.6	0.154967	0.290597	0.372301	0.0214154	0.721102	0.861701	0.91735	0.243783	2.69188e+07	3.12565e+07	2.50979e+07	3.79661e+07	High	High	High	High	171
High	Master Protein	Q8C570	mRNA export factor OS=Mus musculus OX=10090 GN=Rae1 PE=1 SV=1	0	36.438	24	7	8	7	1	368	23.28	7	0	1.16	1.211	1.103	1.057	0.21	0.28	0.14	0.08	0.0158947	0.357682	0.608176	0.719031	0.194209	0.900056	0.972699	0.973452	477629	554260	578322	611339	High	High	High	High	172
High	Master Protein	Q9CPQ8	ATP synthase subunit g, mitochondrial OS=Mus musculus OX=10090 GN=Atp5mg PE=1 SV=1	0	76.977	55	7	67	6	1	103	253.03	7	0	1.16	0.976	0.946	1.124	0.21	-0.03	-0.08	0.17	0.157342	0.521007	0.192779	0.690079	0.723286	0.950385	0.792798	0.970324	1.73889e+07	2.01736e+07	1.69734e+07	1.9082e+07	High	High	High	High	173
Medium	Master Protein	Q8K199	COX assembly mitochondrial protein 2 homolog OS=Mus musculus OX=10090 GN=Cmc2 PE=3 SV=1	0.03	2.582	20	2	2	2	1	79	3.91	2	0	1.16	1.096	1.713	1.813	0.21	0.13	0.78	0.86	0.0621235	0.997227	0.000814388	5.38111e-06	0.456776	0.999773	0.0180751	0.000250416	112587	130601	123433	223753	High	High	High	High	174
High	Master Protein	Q8BGP6	Probable mitochondrial glutathione transporter SLC25A40 OS=Mus musculus OX=10090 GN=Slc25a40 PE=1 SV=1	0	12.097	7	2	3	2	1	337	8.37	2	0	1.159	1.078	1.003	1.079	0.21	0.11	0	0.11	0.0298685	0.932758	0.125822	0.596764	0.300026	0.995494	0.667579	0.96579	254805	295425	274571	296185	High	High	High	High	175
High	Master Protein	Q9D3N8	Growth hormone-regulated TBC protein 1 OS=Mus musculus OX=10090 GN=Grtp1 PE=1 SV=1	0	11.848	9	3	4	3	1	359	7.03	3	0	1.158	1.181	0.991	0.971	0.21	0.24	-0.01	-0.04	0.0613782	0.503088	0.132591	0.802723	0.454332	0.944906	0.681856	0.986585	124440	144041	147004	142702	High	High	High	High	176
High	Master Protein	Q91ZA3	Propionyl-CoA carboxylase alpha chain, mitochondrial OS=Mus musculus OX=10090 GN=Pcca PE=1 SV=2	0	470.802	72	50	195	49	1	724	613.22	50	1	1.158	0.91	1.071	1.362	0.21	-0.14	0.1	0.45	0.162401	0.201771	0.828956	0.103142	0.736237	0.765009	0.990777	0.582502	2.82091e+07	3.26675e+07	2.56701e+07	3.49722e+07	High	High	High	High	177
High	Master Protein	A2AKG8	Focadhesin OS=Mus musculus OX=10090 GN=Focad PE=1 SV=1	0.001	7.917	2	2	2	2	1	1798	5.89	2	0	1.157	2.682	0.979	0.423	0.21	1.42	-0.03	-1.24	0.0841467	1.19194e-12	0.0782026	3.40306e-12	0.531376	8.89062e-11	0.531248	4.21182e-10	30757.7	35596.7	82479.5	34861.2	High	High	High	High	178
High	Master Protein	Q922H4	Mannose-1-phosphate guanyltransferase alpha OS=Mus musculus OX=10090 GN=Gmppa PE=1 SV=1	0.002	7.589	6	2	2	2	1	420	2.14	2	0	1.157	1.258	1.01	0.93	0.21	0.33	0.01	-0.1	0.076843	0.264507	0.212327	0.645272	0.506907	0.838638	0.830316	0.970324	78500.5	90864	98715.3	91794.5	High	High	High	High	179
High	Master Protein	Q9WUU7	Cathepsin Z OS=Mus musculus OX=10090 GN=Ctsz PE=1 SV=1	0	10.882	10	3	5	3	1	306	11.37	3	0	1.157	0.997	1.133	1.314	0.21	0	0.18	0.39	0.0330257	0.40698	0.709407	0.0240396	0.322277	0.915596	0.986902	0.262854	252262	291754	251605	330626	High	High	High	High	180
High	Master Protein	Q9D7H3	RNA 3'-terminal phosphate cyclase OS=Mus musculus OX=10090 GN=RtcA PE=1 SV=2	0	13.282	9	3	5	3	1	366	9.39	3	0	1.156	1.166	0.958	0.949	0.21	0.22	-0.06	-0.08	0.0609797	0.560275	0.0812542	0.664443	0.45237	0.959433	0.543721	0.970324	140505	162362	163856	155492	High	High	High	High	181
High	Master Protein	Q8CHT0	Delta-1-pyrroline-5-carboxylate dehydrogenase, mitochondrial OS=Mus musculus OX=10090 GN=Aldh4a1 PE=1 SV=3	0	120.43	34	18	50	18	1	562	139.84	18	0	1.156	0.918	1.06	1.335	0.21	-0.12	0.08	0.42	0.1511	0.202893	0.698521	0.0908714	0.714923	0.765009	0.986902	0.5625	7.17296e+06	8.29402e+06	6.58295e+06	8.79148e+06	High	High	High	High	182
High	Master Protein	Q921F2	TAR DNA-binding protein 43 OS=Mus musculus OX=10090 GN=Tardbp PE=1 SV=1	0	90.636	29	12	28	12	1	414	83.82	12	0	1.156	1.105	1.339	1.401	0.21	0.14	0.42	0.49	0.0190157	0.923107	0.0901996	0.00279435	0.219539	0.995494	0.570375	0.0536461	2.46688e+06	2.85258e+06	2.72625e+06	3.82046e+06	High	High	High	High	183
High	Master Protein	A2A6Q5	Cell division cycle protein 27 homolog OS=Mus musculus OX=10090 GN=Cdc27 PE=1 SV=1	0.002	6.915	2	2	3	2	1	825	2.54	2	0	1.155	1.372	1.206	1.014	0.21	0.46	0.27	0.02	0.100233	0.136878	0.951916	0.934784	0.596066	0.664184	0.996516	0.997966	27463.3	31713.8	37691.5	38234.3	High	High	High	High	184
High	Master Protein	Q9ERF3	SKI8 subunit of superkiller complex protein OS=Mus musculus OX=10090 GN=Skic8 PE=1 SV=1	0	22.394	21	6	8	6	1	305	15.96	6	0	1.155	1.121	1.047	1.079	0.21	0.16	0.07	0.11	0.0299535	0.736437	0.312099	0.677595	0.300361	0.98508	0.900457	0.970324	612662	707620	686677	741152	High	High	High	High	185
High	Master Protein	P35486	Pyruvate dehydrogenase E1 component subunit alpha, somatic form, mitochondrial OS=Mus musculus OX=10090 GN=Pdha1 PE=1 SV=1	0	293.682	71	31	132	30	1	390	385.22	31	1	1.155	0.989	1.129	1.32	0.21	-0.02	0.18	0.4	0.16934	0.59921	0.79996	0.154021	0.746185	0.969703	0.990777	0.697853	2.82385e+07	3.26228e+07	2.79201e+07	3.68436e+07	High	High	High	High	186
High	Master Protein	P63168	Dynein light chain 1, cytoplasmic OS=Mus musculus OX=10090 GN=Dynll1 PE=1 SV=1	0	17.452	39	5	7	3	1	89	16.25	5	0	1.154	0.877	0.867	1.142	0.21	-0.19	-0.21	0.19	0.0639628	0.0574271	0.0104004	0.258075	0.463273	0.422519	0.140999	0.831517	117429	135540	102950	117581	High	High	High	High	187
High	Master Protein	A2AGH6	Mediator of RNA polymerase II transcription subunit 12 OS=Mus musculus OX=10090 GN=Med12 PE=1 SV=1	0.009	4.369	1	2	2	2	1	2190	2.11	2	0	1.154	1.087	1.221	1.297	0.21	0.12	0.29	0.38	0.0793317	0.871044	0.81754	0.0404139	0.516709	0.995494	0.990777	0.360564	55731	64316.3	60570.3	78558.1	High	High	High	High	188
High	Master Protein	Q921H9	Cytochrome c oxidase assembly factor 7 OS=Mus musculus OX=10090 GN=Coa7 PE=1 SV=1	0	54.916	53	12	21	12	1	231	52.74	12	0	1.154	0.948	1.098	1.336	0.21	-0.08	0.13	0.42	0.0177398	0.0795213	0.74793	0.0138508	0.208013	0.508971	0.986902	0.181874	2.7617e+06	3.18703e+06	2.61844e+06	3.49825e+06	High	High	High	High	189
High	Master Protein	Q62189	U1 small nuclear ribonucleoprotein A OS=Mus musculus OX=10090 GN=Snrpa PE=1 SV=3	0	29.257	22	7	12	5	1	287	29.39	7	2	1.154	1.067	1.427	1.543	0.21	0.09	0.51	0.63	0.017951	0.787884	0.021087	0.00026796	0.209224	0.988107	0.231514	0.00795268	2.26942e+06	2.61827e+06	2.42138e+06	3.7359e+06	High	High	High	High	190
High	Master Protein	Q9D2R0	Acetoacetyl-CoA synthetase OS=Mus musculus OX=10090 GN=Aacs PE=1 SV=1	0	77.54	28	18	31	18	1	672	69.39	18	0	1.153	1.01	0.942	1.075	0.21	0.01	-0.09	0.1	0.0165231	0.310442	0.0620833	0.52709	0.198141	0.876061	0.46727	0.95815	2.98787e+06	3.44548e+06	3.01865e+06	3.24487e+06	High	High	High	High	191
High	Master Protein	B7ZMP1	Xaa-Pro aminopeptidase 3 OS=Mus musculus OX=10090 GN=Xpnpep3 PE=1 SV=1	0.001	8.587	6	3	3	3	1	506	6.97	3	0	1.152	1.689	0.987	0.673	0.2	0.76	-0.02	-0.57	0.0466858	4.52751e-05	0.101649	0.000318463	0.387892	0.00130302	0.611258	0.00926251	203351	234218	343506	231198	High	High	High	High	192
High	Master Protein	Q8BVL3	Sorting nexin-17 OS=Mus musculus OX=10090 GN=Snx17 PE=1 SV=2	0	11.005	8	3	3	3	1	470	5.55	3	0	1.152	1.235	1.168	1.089	0.2	0.3	0.22	0.12	0.0784679	0.484063	0.743214	0.534318	0.513453	0.940326	0.986902	0.962252	21142.4	24349.7	26113.1	28440.6	High	High	High	High	193
High	Master Protein	Q64436	Potassium-transporting ATPase alpha chain 1 OS=Mus musculus OX=10090 GN=Atp4a PE=1 SV=4	0	1072.62	58	64	905	57	1	1034	3110.27	64	8	1.152	0.954	0.996	1.204	0.2	-0.07	-0.01	0.27	0.17676	0.394635	0.396671	0.40308	0.754982	0.909302	0.932595	0.920105	5.99741e+08	6.9113e+08	5.72019e+08	6.88509e+08	High	High	High	High	194
High	Master Protein	Q6PFR5	Transformer-2 protein homolog alpha OS=Mus musculus OX=10090 GN=Tra2a PE=1 SV=1	0	18.82	19	7	7	5	1	281	14.88	7	1	1.152	1.011	1.24	1.413	0.2	0.02	0.31	0.5	0.0300341	0.463707	0.494001	0.0056302	0.300651	0.931163	0.957561	0.0943829	624474	719310	631134	891671	High	High	High	High	195
High	Master Protein	Q08652	Retinol-binding protein 2 OS=Mus musculus OX=10090 GN=Rbp2 PE=2 SV=2	0	10.005	14	2	2	2	1	134	6.92	2	0	1.151	0.538	0.781	1.67	0.2	-0.89	-0.36	0.74	0.0261039	1.17478e-10	2.88741e-05	1.45769e-05	0.27654	7.42921e-09	0.000964959	0.000601257	441876	508553	237791	397045	High	High	High	High	196
High	Master Protein	Q9EQQ2	Protein YIPF5 OS=Mus musculus OX=10090 GN=Yipf5 PE=1 SV=1	0	15.441	8	2	3	2	1	257	10.87	2	0	1.15	1.151	0.915	0.914	0.2	0.2	-0.13	-0.13	0.0528447	0.590754	0.0220182	0.383702	0.418734	0.968502	0.237757	0.913628	187933	216135	216313	197817	High	High	High	High	197
High	Master Protein	Q9R0Q6	Actin-related protein 2/3 complex subunit 1A OS=Mus musculus OX=10090 GN=Arpc1a PE=1 SV=1	0	63.98	36	12	18	11	1	370	58.19	12	0	1.15	1.047	1.034	1.136	0.2	0.07	0.05	0.18	0.0406402	0.644633	0.365028	0.264592	0.35631	0.97492	0.91735	0.839221	3.89319e+06	4.47751e+06	4.07486e+06	4.62907e+06	High	High	High	High	198
High	Master Protein	Q8CIW6	Solute carrier family 26 member 6 OS=Mus musculus OX=10090 GN=Slc26a6 PE=1 SV=2	0	19.361	6	3	5	3	1	758	13.23	3	0	1.148	1.117	0.879	0.903	0.2	0.16	-0.19	-0.15	0.0584037	0.823492	0.00599665	0.372414	0.441138	0.991263	0.091284	0.902876	177021	203227	197725	178540	High	High	High	High	199
High	Master Protein	Q9CQA9	Cancer-related nucleoside-triphosphatase homolog OS=Mus musculus OX=10090 GN=Ntpcr PE=1 SV=1	0	15.926	24	3	3	3	1	190	8.84	3	0	1.148	1.305	1.064	0.936	0.2	0.38	0.09	-0.09	0.0745404	0.129099	0.401904	0.591093	0.505483	0.646825	0.934828	0.96579	115576	132727	150879	141274	High	High	High	High	200
High	Master Protein	O08756	3-hydroxyacyl-CoA dehydrogenase type-2 OS=Mus musculus OX=10090 GN=Hsd17b10 PE=1 SV=4	0	199.614	56	13	81	13	1	261	304.72	13	0	1.148	1.044	1.034	1.138	0.2	0.06	0.05	0.19	0.187674	0.925716	0.604212	0.613698	0.762761	0.995494	0.971853	0.96579	8.21034e+06	9.42806e+06	8.56793e+06	9.7514e+06	High	High	High	High	201
High	Master Protein	Q8K310	Matrin-3 OS=Mus musculus OX=10090 GN=Matr3 PE=1 SV=1	0	206.717	35	31	67	31	1	846	167.86	31	0	1.148	0.999	1.189	1.366	0.2	0	0.25	0.45	0.187209	0.60465	0.482483	0.0921411	0.762761	0.97181	0.957561	0.56371	7.79567e+06	8.95321e+06	7.78945e+06	1.06423e+07	High	High	High	High	202
High	Master Protein	P16125	L-lactate dehydrogenase B chain OS=Mus musculus OX=10090 GN=Ldhb PE=1 SV=2	0	157.856	45	16	71	14	1	334	224.58	16	0	1.148	0.87	1.184	1.564	0.2	-0.2	0.24	0.64	0.187337	0.0918297	0.503112	0.0119746	0.762761	0.548527	0.957561	0.165987	1.18543e+07	1.36139e+07	1.03104e+07	1.61221e+07	High	High	High	High	203
High	Master Protein	Q8VE65	Transcription initiation factor TFIID subunit 12 OS=Mus musculus OX=10090 GN=Taf12 PE=1 SV=1	0.002	6.314	10	2	2	2	1	161	5.6	2	0	1.147	1.484	1.152	0.89	0.2	0.57	0.2	-0.17	0.10452	0.0612674	0.682764	0.418643	0.601272	0.438443	0.986902	0.920105	16118.4	18485.5	23927.2	21287.9	High	High	High	High	204
High	Master Protein	O55126	Protein NipSnap homolog 2 OS=Mus musculus OX=10090 GN=Nipsnap2 PE=1 SV=1	0	71.619	33	11	45	11	1	281	131.71	11	0	1.147	0.927	1.005	1.243	0.2	-0.11	0.01	0.31	0.152387	0.210169	0.354044	0.158683	0.717573	0.776851	0.914265	0.706391	6.70742e+06	7.69286e+06	6.21736e+06	7.73054e+06	High	High	High	High	205
High	Master Protein	Q91X72	Hemopexin OS=Mus musculus OX=10090 GN=Hpx PE=1 SV=2	0	31.069	23	9	9	9	1	460	19.38	9	0	1.147	1.008	1.127	1.284	0.2	0.01	0.17	0.36	0.0276383	0.448238	0.787764	0.0596741	0.284111	0.929052	0.990777	0.459971	440475	505320	443840	569693	High	High	High	High	206
High	Master Protein	Q3U2C5	E3 ubiquitin-protein ligase RNF149 OS=Mus musculus OX=10090 GN=Rnf149 PE=1 SV=3	0.001	8.512	10	3	3	3	1	394	5.64	3	0	1.147	1.219	1.65	1.553	0.2	0.29	0.72	0.63	0.14212	0.645577	0.065853	0.00677423	0.699727	0.97492	0.484115	0.110072	9488.62	10882.1	11565.9	17957.9	High	High	High	High	207
High	Master Protein	Q9CR47	Ribosome biogenesis protein NSA2 homolog OS=Mus musculus OX=10090 GN=Nsa2 PE=2 SV=1	0.004	5.197	10	3	3	3	1	260	4.96	3	0	1.146	2.142	1.137	0.608	0.2	1.1	0.19	-0.72	0.0771711	4.80517e-10	0.781455	2.47178e-05	0.508298	2.94719e-08	0.990777	0.000939761	112956	129494	241972	147217	High	High	High	High	208
High	Master Protein	Q8BYP3	Rho-related GTP-binding protein RhoF OS=Mus musculus OX=10090 GN=Rhof PE=1 SV=1	0	52.197	37	8	17	8	1	211	51.16	8	0	1.146	1.168	0.948	0.931	0.2	0.22	-0.08	-0.1	0.0246517	0.435639	0.0339199	0.519302	0.265018	0.925756	0.323431	0.958135	2.04875e+06	2.3487e+06	2.39309e+06	2.22715e+06	High	High	High	High	209
High	Master Protein	O70433	Four and a half LIM domains protein 2 OS=Mus musculus OX=10090 GN=Fhl2 PE=1 SV=1	0	17.916	22	5	8	5	1	279	15.66	5	0	1.146	1.325	1.232	1.066	0.2	0.41	0.3	0.09	0.0674029	0.0637526	0.634828	0.658217	0.479236	0.449591	0.982221	0.970324	157302	180236	208425	222110	High	High	High	High	210
High	Master Protein	P58774	Tropomyosin beta chain OS=Mus musculus OX=10090 GN=Tpm2 PE=1 SV=1	0	126.328	45	25	61	4	1	284	127.48	25	1	1.146	1.01	1.054	1.197	0.2	0.01	0.08	0.26	0.080321	0.493681	0.362079	0.186928	0.520208	0.944906	0.915503	0.742065	134467	154132	135769	162509	High	High	High	High	211
High	Master Protein	P20918	Plasminogen OS=Mus musculus OX=10090 GN=Plg PE=1 SV=3	0	32.661	10	8	9	7	1	812	22.79	8	0	1.146	1.138	1.686	1.696	0.2	0.19	0.75	0.76	0.0380195	0.672761	0.00020748	8.93535e-07	0.345873	0.978969	0.00563783	4.85766e-05	562536	644393	640268	1.08621e+06	High	High	High	High	212
High	Master Protein	Q9CXT8	Mitochondrial-processing peptidase subunit beta OS=Mus musculus OX=10090 GN=Pmpcb PE=1 SV=1	0	72.125	32	12	26	11	1	489	80.82	12	0	1.144	0.979	1.105	1.29	0.19	-0.03	0.14	0.37	0.0272553	0.203284	0.646577	0.016039	0.283066	0.765009	0.983692	0.199357	1.2542e+06	1.43452e+06	1.22806e+06	1.58454e+06	High	High	High	High	213
High	Master Protein	Q8K4G5	Actin-binding LIM protein 1 OS=Mus musculus OX=10090 GN=Ablim1 PE=1 SV=1	0	29.933	15	11	11	11	1	861	20.79	11	0	1.144	1.12	1.319	1.347	0.19	0.16	0.4	0.43	0.0356505	0.798675	0.19278	0.0237917	0.337051	0.990464	0.792798	0.261657	551641	631234	618096	832601	High	High	High	High	214
High	Master Protein	O08784	Treacle protein OS=Mus musculus OX=10090 GN=Tcof1 PE=1 SV=1	0	9.641	3	4	5	4	1	1320	7.36	4	0	1.144	0.814	1.043	1.466	0.19	-0.3	0.06	0.55	0.0282054	0.00690193	0.240866	0.0014147	0.287794	0.0949301	0.855047	0.0307063	315106	360379	256398	375847	High	High	High	High	215
High	Master Protein	Q8R313	Exocyst complex component 6 OS=Mus musculus OX=10090 GN=Exoc6 PE=1 SV=2	0.001	8.012	5	3	3	3	1	802	4.29	3	0	1.143	1.205	0.849	0.806	0.19	0.27	-0.24	-0.31	0.104215	0.588699	0.00694113	0.119176	0.600254	0.968502	0.103229	0.629081	23086.5	26377.5	27809.3	22405.3	High	High	High	High	216
High	Master Protein	O08709	Peroxiredoxin-6 OS=Mus musculus OX=10090 GN=Prdx6 PE=1 SV=3	0	115.791	59	14	35	14	1	224	92.21	14	0	1.143	1.186	1.173	1.13	0.19	0.25	0.23	0.18	0.0232019	0.354115	0.74158	0.277345	0.256057	0.897776	0.986902	0.852279	2.56234e+06	2.92765e+06	3.03836e+06	3.43293e+06	High	High	High	High	217
High	Master Protein	Q91ZE0	Trimethyllysine dioxygenase, mitochondrial OS=Mus musculus OX=10090 GN=Tmlhe PE=1 SV=2	0	89.334	45	18	36	18	1	421	81.01	18	0	1.143	0.95	1.033	1.242	0.19	-0.07	0.05	0.31	0.025052	0.0843811	0.348696	0.0701107	0.266855	0.522587	0.911286	0.495134	2.75047e+06	3.14351e+06	2.6135e+06	3.24687e+06	High	High	High	High	218
High	Master Protein	Q99MN9	Propionyl-CoA carboxylase beta chain, mitochondrial OS=Mus musculus OX=10090 GN=Pccb PE=1 SV=2	0	335.939	63	31	145	31	1	541	441.81	31	0	1.143	0.959	1.063	1.267	0.19	-0.06	0.09	0.34	0.203737	0.420745	0.782223	0.243498	0.784207	0.918636	0.990777	0.814519	1.12461e+07	1.28505e+07	1.07811e+07	1.36628e+07	High	High	High	High	219
High	Master Protein	O35646	Calpain-6 OS=Mus musculus OX=10090 GN=Capn6 PE=1 SV=2	0	20.141	10	7	9	7	1	641	14.72	7	0	1.143	1.065	1.394	1.496	0.19	0.09	0.48	0.58	0.0375548	0.890752	0.0678703	0.000225576	0.343967	0.995494	0.492717	0.0067638	654311	747840	696996	1.04257e+06	High	High	High	High	220
High	Master Protein	Q8BMS1	Trifunctional enzyme subunit alpha, mitochondrial OS=Mus musculus OX=10090 GN=Hadha PE=1 SV=1	0	782.463	67	48	364	48	1	763	1254.63	48	0	1.142	1.065	0.979	1.05	0.19	0.09	-0.03	0.07	0.204274	0.880668	0.315658	0.966588	0.785233	0.995494	0.902435	0.999848	1.47079e+08	1.68035e+08	1.56692e+08	1.64451e+08	High	High	High	High	221
High	Master Protein	Q0VBK2	Keratin, type II cytoskeletal 80 OS=Mus musculus OX=10090 GN=Krt80 PE=1 SV=1	0	22.951	17	8	9	7	1	452	18.32	8	0	1.142	1.128	1.096	1.11	0.19	0.17	0.13	0.15	0.0285376	0.712988	0.509771	0.404754	0.289698	0.98508	0.959125	0.920105	322524	368456	363817	403790	High	High	High	High	222
High	Master Protein	Q8QZS1	3-hydroxyisobutyryl-CoA hydrolase, mitochondrial OS=Mus musculus OX=10090 GN=Hibch PE=1 SV=1	0	188.493	61	22	72	22	1	385	227.65	22	0	1.142	0.966	1.007	1.19	0.19	-0.05	0.01	0.25	0.206302	0.464461	0.45169	0.446304	0.789881	0.931163	0.955524	0.930052	1.20487e+07	1.37571e+07	1.16448e+07	1.38541e+07	High	High	High	High	223
High	Master Protein	P28659	CUGBP Elav-like family member 1 OS=Mus musculus OX=10090 GN=Celf1 PE=1 SV=2	0	40.632	15	9	16	9	1	486	36.39	9	0	1.142	1.166	1.214	1.189	0.19	0.22	0.28	0.25	0.0331371	0.410664	0.551572	0.10038	0.322317	0.916605	0.964415	0.579632	1.38546e+06	1.58279e+06	1.61548e+06	1.92149e+06	High	High	High	High	224
High	Master Protein	Q8BH47	Vesicle-trafficking protein SEC22a OS=Mus musculus OX=10090 GN=Sec22a PE=2 SV=1	0	13.575	12	3	3	3	1	307	10.11	3	0	1.14	1.13	0.775	0.782	0.19	0.18	-0.37	-0.35	0.0852126	0.799609	0.000433431	0.0608396	0.53636	0.990464	0.0107251	0.465995	116829	133219	132043	103266	High	High	High	High	225
High	Master Protein	P52483	Ubiquitin-conjugating enzyme E2 E3 OS=Mus musculus OX=10090 GN=Ube2e3 PE=1 SV=2	0	9.667	13	3	3	3	1	207	5.51	3	0	1.139	1.602	1.14	0.811	0.19	0.68	0.19	-0.3	0.0827398	0.000714754	0.784062	0.096223	0.52707	0.0147462	0.990777	0.57072	118480	134910	189780	153837	High	High	High	High	226
High	Master Protein	P56480	ATP synthase subunit beta, mitochondrial OS=Mus musculus OX=10090 GN=Atp5f1b PE=1 SV=2	0	757.571	80	33	696	33	1	529	2487.98	33	0	1.139	0.984	0.997	1.154	0.19	-0.02	0	0.21	0.214369	0.566537	0.39963	0.569406	0.80528	0.96106	0.932897	0.96579	4.08589e+08	4.65429e+08	4.01862e+08	4.63945e+08	High	High	High	High	227
High	Master Protein	Q9DB96	Neuroguidin OS=Mus musculus OX=10090 GN=Ngdn PE=1 SV=1	0	18.727	11	3	4	3	1	315	9.17	3	0	1.138	1.189	1.127	1.078	0.19	0.25	0.17	0.11	0.0832491	0.507804	0.741857	0.566437	0.528577	0.94521	0.986902	0.96579	108469	123472	129007	139128	High	High	High	High	228
High	Master Protein	O35218	Cleavage and polyadenylation specificity factor subunit 2 OS=Mus musculus OX=10090 GN=Cpsf2 PE=1 SV=1	0	14.367	5	4	5	4	1	782	6.79	4	0	1.138	1.277	1.226	1.093	0.19	0.35	0.29	0.13	0.105828	0.209855	0.712888	0.503805	0.602916	0.776851	0.986902	0.954293	102566	116748	130965	143137	High	High	High	High	229
High	Master Protein	P18242	Cathepsin D OS=Mus musculus OX=10090 GN=Ctsd PE=1 SV=1	0	167.543	41	16	86	16	1	410	265.31	16	0	1.138	0.976	1.068	1.245	0.19	-0.03	0.09	0.32	0.217733	0.523183	0.811721	0.293679	0.809677	0.951102	0.990777	0.862782	1.47991e+07	1.68416e+07	1.44508e+07	1.79843e+07	High	High	High	High	230
High	Master Protein	P68040	Receptor of activated protein C kinase 1 OS=Mus musculus OX=10090 GN=Rack1 PE=1 SV=3	0	151.826	74	20	50	20	1	317	169.94	20	0	1.137	0.852	0.899	1.199	0.18	-0.23	-0.15	0.26	0.149023	0.0184938	0.0247047	0.168143	0.70836	0.198518	0.259779	0.721912	5.87044e+06	6.67181e+06	5.00294e+06	5.99645e+06	High	High	High	High	231
High	Master Protein	Q9JK53	Prolargin OS=Mus musculus OX=10090 GN=Prelp PE=1 SV=2	0	9.467	8	3	4	3	1	378	6.98	3	0	1.136	1.307	1.093	0.949	0.18	0.39	0.13	-0.08	0.111652	0.243218	0.381997	0.681435	0.620809	0.820315	0.91895	0.970324	30756.1	34936.1	40212.4	38174.3	High	High	High	High	232
High	Master Protein	Q91V12	Cytosolic acyl coenzyme A thioester hydrolase OS=Mus musculus OX=10090 GN=Acot7 PE=1 SV=2	0	34.571	19	5	9	5	1	381	25.84	5	0	1.136	0.994	0.984	1.126	0.18	-0.01	-0.02	0.17	0.0329161	0.364147	0.0810506	0.408463	0.322277	0.90151	0.542983	0.920105	487311	553797	484330	545149	High	High	High	High	233
High	Master Protein	O70133	ATP-dependent RNA helicase A OS=Mus musculus OX=10090 GN=Dhx9 PE=1 SV=2	0	395.813	45	55	144	55	1	1380	443.27	55	0	1.136	1.051	1.112	1.202	0.18	0.07	0.15	0.27	0.224359	0.978774	0.904507	0.40719	0.819642	0.999773	0.991669	0.920105	1.8218e+07	2.06938e+07	1.91457e+07	2.30185e+07	High	High	High	High	234
High	Master Protein	Q9JKA5	Cell surface A33 antigen OS=Mus musculus OX=10090 GN=Gpa33 PE=2 SV=2	0	35.515	19	5	8	5	1	319	26.34	5	0	1.135	1.604	1.048	0.741	0.18	0.68	0.07	-0.43	0.0373581	4.58106e-06	0.324392	0.00327763	0.343246	0.000163513	0.906945	0.0611089	1.15678e+06	1.31241e+06	1.85514e+06	1.37503e+06	High	High	High	High	235
High	Master Protein	Q91W92	Cdc42 effector protein 1 OS=Mus musculus OX=10090 GN=Cdc42ep1 PE=1 SV=1	0	10.36	11	4	4	4	1	409	9	4	0	1.135	1.184	1.076	1.032	0.18	0.24	0.11	0.05	0.104841	0.555109	0.466683	0.774066	0.602524	0.958912	0.957326	0.986585	76357.3	86686.1	90372.8	93256.3	High	High	High	High	236
High	Master Protein	Q9JKF7	39S ribosomal protein L39, mitochondrial OS=Mus musculus OX=10090 GN=Mrpl39 PE=1 SV=4	0	28.007	23	7	11	7	1	336	28.43	7	0	1.135	1.006	1.038	1.171	0.18	0.01	0.05	0.23	0.0395381	0.360558	0.221548	0.126024	0.352404	0.901085	0.838892	0.63961	1.48216e+06	1.68199e+06	1.49096e+06	1.74584e+06	High	High	High	High	237
High	Master Protein	P67984	60S ribosomal protein L22 OS=Mus musculus OX=10090 GN=Rpl22 PE=1 SV=2	0	34.265	25	4	14	4	1	128	45.38	4	0	1.135	1.136	1.196	1.195	0.18	0.18	0.26	0.26	0.0318624	0.678085	0.591496	0.122092	0.316772	0.98088	0.970956	0.632757	2.57878e+06	2.92643e+06	2.92847e+06	3.49983e+06	High	High	High	High	238
High	Master Protein	Q9D0I8	mRNA turnover protein 4 homolog OS=Mus musculus OX=10090 GN=Mrto4 PE=1 SV=1	0	41.398	39	11	12	11	1	239	33.41	11	0	1.134	1.409	1.136	0.914	0.18	0.49	0.18	-0.13	0.0468014	0.00333965	0.859262	0.284414	0.388298	0.0536743	0.990777	0.857667	699385	792993	985485	900853	High	High	High	High	239
High	Master Protein	Q99N96	39S ribosomal protein L1, mitochondrial OS=Mus musculus OX=10090 GN=Mrpl1 PE=1 SV=2	0	66.137	45	13	17	12	1	336	40.51	13	1	1.134	1.142	1.023	1.016	0.18	0.19	0.03	0.02	0.0393793	0.591527	0.174339	0.875318	0.352354	0.968502	0.765696	0.995594	1.64917e+06	1.87024e+06	1.88322e+06	1.91383e+06	High	High	High	High	240
High	Master Protein	Q8VEM8	Phosphate carrier protein, mitochondrial OS=Mus musculus OX=10090 GN=Slc25a3 PE=1 SV=1	0	288.689	56	20	236	20	1	357	654.89	20	0	1.134	1.002	0.986	1.115	0.18	0	-0.02	0.16	0.231086	0.68628	0.346959	0.728276	0.831224	0.982308	0.911286	0.975648	2.89829e+08	3.28608e+08	2.90438e+08	3.23914e+08	High	High	High	High	241
High	Master Protein	Q9DB77	Cytochrome b-c1 complex subunit 2, mitochondrial OS=Mus musculus OX=10090 GN=Uqcrc2 PE=1 SV=1	0	355.394	57	28	209	27	1	453	729.56	28	1	1.134	1.029	1.023	1.127	0.18	0.04	0.03	0.17	0.231959	0.868685	0.537281	0.679415	0.831224	0.995494	0.964415	0.970324	1.07412e+08	1.21755e+08	1.10513e+08	1.24523e+08	High	High	High	High	242
High	Master Protein	Q9ERG0	LIM domain and actin-binding protein 1 OS=Mus musculus OX=10090 GN=Lima1 PE=1 SV=3	0	322.262	65	50	169	48	1	753	449.19	50	2	1.134	1.149	1.188	1.172	0.18	0.2	0.25	0.23	0.230596	0.402752	0.486979	0.506514	0.830432	0.913448	0.957561	0.954916	2.14263e+07	2.42964e+07	2.46259e+07	2.88565e+07	High	High	High	High	243
High	Master Protein	P60710	Actin, cytoplasmic 1 OS=Mus musculus OX=10090 GN=Actb PE=1 SV=1	0	619.754	73	28	706	10	1	375	2476.09	28	23	1.134	1.023	1.112	1.233	0.18	0.03	0.15	0.3	0.229542	0.828352	0.908209	0.322854	0.828074	0.991263	0.991669	0.880835	4.68901e+08	5.31863e+08	4.79701e+08	5.91296e+08	High	High	High	High	244
High	Master Protein	Q569Z6	Thyroid hormone receptor-associated protein 3 OS=Mus musculus OX=10090 GN=Thrap3 PE=1 SV=1	0	147.946	28	32	52	31	1	951	110.07	32	0	1.134	1.038	1.25	1.365	0.18	0.05	0.32	0.45	0.0553004	0.632195	0.293864	0.0137492	0.428265	0.97492	0.886318	0.181359	4.37043e+06	4.9553e+06	4.53783e+06	6.19304e+06	High	High	High	High	245
High	Master Protein	Q8R3G9	Tetraspanin-8 OS=Mus musculus OX=10090 GN=Tspan8 PE=1 SV=1	0	112.838	35	7	54	7	1	235	216.3	7	0	1.133	1.121	1.031	1.043	0.18	0.16	0.04	0.06	0.233534	0.542071	0.58665	0.932509	0.831526	0.957519	0.970956	0.997966	2.39328e+07	2.7117e+07	2.68253e+07	2.79661e+07	High	High	High	High	246
High	Master Protein	Q3TTY5	Keratin, type II cytoskeletal 2 epidermal OS=Mus musculus OX=10090 GN=Krt2 PE=1 SV=1	0	73.163	12	14	61	6	1	707	138.22	14	0	1.133	1.788	1.663	1.054	0.18	0.84	0.73	0.08	0.0351495	4.33935e-09	7.23588e-05	0.681121	0.335986	2.4511e-07	0.00223812	0.970324	2.70368e+06	3.06323e+06	4.834e+06	5.09476e+06	High	High	High	High	247
High	Master Protein	Q9DCJ5	NADH dehydrogenase [ubiquinone] 1 alpha subcomplex subunit 8 OS=Mus musculus OX=10090 GN=Ndufa8 PE=1 SV=3	0	101.578	67	11	62	11	1	172	182.74	11	0	1.133	1.04	1.012	1.103	0.18	0.06	0.02	0.14	0.233104	0.945584	0.480245	0.781339	0.831227	0.995981	0.957561	0.986585	4.15823e+07	4.71202e+07	4.32442e+07	4.77055e+07	High	High	High	High	248
High	Master Protein	Q9D1B9	39S ribosomal protein L28, mitochondrial OS=Mus musculus OX=10090 GN=Mrpl28 PE=1 SV=3	0	36.637	32	9	15	9	1	257	28.73	9	0	1.133	0.992	1.085	1.239	0.18	-0.01	0.12	0.31	0.0358669	0.396101	0.468646	0.0978613	0.337089	0.911237	0.957326	0.576583	412201	467172	408972	506905	High	High	High	High	249
High	Master Protein	Q64524	Histone H2B type 2-E OS=Mus musculus OX=10090 GN=H2bc21 PE=1 SV=3	0	105.481	59	10	208	2	1	126	677.57	10	2	1.132	1.157	0.903	0.884	0.18	0.21	-0.15	-0.18	0.0445872	0.50073	0.0109063	0.200206	0.376371	0.944906	0.146806	0.759538	1.01583e+06	1.15035e+06	1.17517e+06	1.03859e+06	High	High	High	High	250
High	Master Protein	Q9DCS9	NADH dehydrogenase [ubiquinone] 1 beta subcomplex subunit 10 OS=Mus musculus OX=10090 GN=Ndufb10 PE=1 SV=3	0	136.412	61	13	99	13	1	176	291.86	13	0	1.132	1.006	0.968	1.09	0.18	0.01	-0.05	0.12	0.235428	0.71255	0.272344	0.841475	0.832876	0.98508	0.867824	0.993296	2.18764e+07	2.47744e+07	2.20085e+07	2.39869e+07	High	High	High	High	251
High	Master Protein	Q9D0M3	Cytochrome c1, heme protein, mitochondrial OS=Mus musculus OX=10090 GN=Cyc1 PE=1 SV=1	0	171.098	60	13	124	13	1	325	418.89	13	0	1.132	1.026	0.995	1.098	0.18	0.04	-0.01	0.14	0.237716	0.845615	0.391854	0.80307	0.834877	0.993287	0.929296	0.986585	4.61642e+07	5.22474e+07	4.73429e+07	5.19978e+07	High	High	High	High	252
High	Master Protein	Q924D0	Reticulon-4-interacting protein 1, mitochondrial OS=Mus musculus OX=10090 GN=Rtn4ip1 PE=1 SV=2	0	67.136	36	10	23	10	1	396	71.45	10	0	1.132	1.055	1.042	1.117	0.18	0.08	0.06	0.16	0.0364859	0.713889	0.281579	0.306985	0.338564	0.98508	0.873913	0.870663	1.20909e+06	1.3685e+06	1.27611e+06	1.42538e+06	High	High	High	High	253
High	Master Protein	Q8VDM6	Heterogeneous nuclear ribonucleoprotein U-like protein 1 OS=Mus musculus OX=10090 GN=Hnrnpul1 PE=1 SV=1	0	56.686	18	13	17	13	1	859	42	13	0	1.132	0.986	1.412	1.621	0.18	-0.02	0.5	0.7	0.0512157	0.32744	0.0417915	2.59569e-05	0.413136	0.894388	0.369327	0.000967893	749910	848795	739286	1.1981e+06	High	High	High	High	254
High	Master Protein	Q9CZU4	GTPase Era, mitochondrial OS=Mus musculus OX=10090 GN=Eral1 PE=2 SV=1	0.002	6.89	7	2	2	2	1	437	4.79	2	0	1.131	1.4	1.139	0.921	0.18	0.49	0.19	-0.12	0.114748	0.0904307	0.600883	0.517972	0.631269	0.544238	0.970956	0.958043	33351.5	37736.1	46690.4	42985.7	High	High	High	High	255
High	Master Protein	Q03265	ATP synthase subunit alpha, mitochondrial OS=Mus musculus OX=10090 GN=Atp5f1a PE=1 SV=1	0	552.524	70	47	575	47	1	553	1688.34	47	0	1.131	1.012	1.013	1.133	0.18	0.02	0.02	0.18	0.239177	0.750108	0.482517	0.654899	0.836977	0.98508	0.957561	0.970324	5.21591e+08	5.90093e+08	5.27643e+08	5.97672e+08	High	High	High	High	256
High	Master Protein	P14142	Solute carrier family 2, facilitated glucose transporter member 4 OS=Mus musculus OX=10090 GN=Slc2a4 PE=1 SV=3	0	20.648	6	3	7	3	1	509	15.77	3	0	1.13	1.252	1.027	0.926	0.18	0.32	0.04	-0.11	0.120536	0.321256	0.21405	0.554355	0.644931	0.886236	0.831465	0.965089	69609.8	78642.2	87153.2	80734	High	High	High	High	257
High	Master Protein	P50136	2-oxoisovalerate dehydrogenase subunit alpha, mitochondrial OS=Mus musculus OX=10090 GN=Bckdha PE=1 SV=1	0	274.59	61	23	108	23	1	442	382.67	23	0	1.13	1.014	0.956	1.065	0.18	0.02	-0.07	0.09	0.245331	0.765886	0.226197	0.959332	0.842749	0.987135	0.845195	0.999848	1.38716e+07	1.5668e+07	1.40648e+07	1.49767e+07	High	High	High	High	258
High	Master Protein	Q8VE80	THO complex subunit 3 OS=Mus musculus OX=10090 GN=Thoc3 PE=2 SV=1	0.005	4.962	5	2	2	2	1	351	4.04	2	0	1.13	1.122	1.251	1.26	0.18	0.17	0.32	0.33	0.0945552	0.828284	0.589061	0.0830217	0.578268	0.991263	0.970956	0.535407	124988	141298	140267	176769	High	High	High	High	259
High	Master Protein	P35831	Tyrosine-protein phosphatase non-receptor type 12 OS=Mus musculus OX=10090 GN=Ptpn12 PE=1 SV=3	0.002	7.282	3	2	2	2	1	775	2.57	2	0	1.129	1.347	1.016	0.852	0.18	0.43	0.02	-0.23	0.162232	0.251382	0.288091	0.391791	0.736237	0.829954	0.881503	0.920105	11132.6	12571.8	14992.6	12777.4	High	High	High	High	260
High	Master Protein	Q8BTH8	Casein kinase I isoform gamma-1 OS=Mus musculus OX=10090 GN=Csnk1g1 PE=1 SV=2	0.001	7.733	4	2	2	2	1	459	4.74	2	0	1.129	1.16	1.016	0.989	0.18	0.21	0.02	-0.02	0.126688	0.780303	0.145975	0.925416	0.658462	0.987748	0.716724	0.997966	30723.1	34695.9	35649.5	35267.6	High	High	High	High	261
High	Master Protein	Q9CWJ9	Bifunctional purine biosynthesis protein ATIC OS=Mus musculus OX=10090 GN=Atic PE=1 SV=2	0	54.652	27	12	14	12	1	592	36.85	12	0	1.129	1.017	0.916	1.016	0.17	0.02	-0.13	0.02	0.0563604	0.546618	0.0190723	0.952962	0.433047	0.958738	0.214517	0.999848	652189	736154	663452	673993	High	High	High	High	262
High	Master Protein	Q8CH25	SAFB-like transcription modulator OS=Mus musculus OX=10090 GN=Sltm PE=1 SV=1	0	83.929	15	18	24	18	1	1031	42.77	18	0	1.129	1.002	1.107	1.247	0.17	0	0.15	0.32	0.0393625	0.307077	0.649726	0.0371411	0.352354	0.875771	0.984305	0.341851	1.74953e+06	1.97461e+06	1.75328e+06	2.18561e+06	High	High	High	High	263
High	Master Protein	Q9DCT2	NADH dehydrogenase [ubiquinone] iron-sulfur protein 3, mitochondrial OS=Mus musculus OX=10090 GN=Ndufs3 PE=1 SV=2	0	195.042	60	23	129	23	1	263	401.78	23	0	1.128	1.032	0.985	1.076	0.17	0.04	-0.02	0.11	0.251869	0.887848	0.343116	0.903978	0.84674	0.995494	0.911286	0.995594	3.18271e+07	3.58879e+07	3.28339e+07	3.53449e+07	High	High	High	High	264
High	Master Protein	Q9DCU0	Membrane progestin receptor gamma OS=Mus musculus OX=10090 GN=Paqr5 PE=2 SV=1	0	17.431	14	4	4	4	1	330	9.69	4	0	1.128	1.011	0.989	1.104	0.17	0.02	-0.02	0.14	0.0690582	0.48338	0.0999798	0.488453	0.485662	0.940087	0.604348	0.949643	236894	267107	239462	264291	High	High	High	High	265
High	Master Protein	Q9R0U0	Serine/arginine-rich splicing factor 10 OS=Mus musculus OX=10090 GN=Srsf10 PE=1 SV=2	0	30.136	24	9	11	9	1	262	15.7	9	0	1.128	1.068	1.16	1.224	0.17	0.1	0.21	0.29	0.0560862	0.863734	0.951238	0.0722603	0.432049	0.995494	0.996516	0.501277	984245	1.1099e+06	1.05164e+06	1.28721e+06	High	High	High	High	266
High	Master Protein	Q8BVI4	Dihydropteridine reductase OS=Mus musculus OX=10090 GN=Qdpr PE=1 SV=2	0	35.53	27	5	6	5	1	241	21.29	5	0	1.128	1.093	1.265	1.306	0.17	0.13	0.34	0.39	0.0673773	0.95902	0.45387	0.0303998	0.479236	0.998445	0.95636	0.3028	218723	246779	238961	312062	High	High	High	High	267
High	Master Protein	O35604	NPC intracellular cholesterol transporter 1 OS=Mus musculus OX=10090 GN=Npc1 PE=1 SV=2	0.005	5.009	2	2	2	2	1	1277	2.02	2	0	1.127	1.406	1.097	0.88	0.17	0.49	0.13	-0.18	0.142889	0.135041	0.467705	0.41865	0.700815	0.658564	0.957326	0.920105	15392.5	17344.7	21637.7	19035.7	High	High	High	High	268
High	Master Protein	P97770	tRNA (guanine(6)-N2)-methyltransferase THUMP3 OS=Mus musculus OX=10090 GN=Thumpd3 PE=1 SV=1	0	17.293	8	5	6	5	1	505	13.48	5	0	1.126	1.434	1.298	1.02	0.17	0.52	0.38	0.03	0.0510158	0.00110454	0.159303	0.863595	0.412667	0.0207969	0.734831	0.995594	1.29e+06	1.45292e+06	1.84934e+06	1.88661e+06	High	High	High	High	269
High	Master Protein	Q99N85	28S ribosomal protein S18a, mitochondrial OS=Mus musculus OX=10090 GN=Mrps18a PE=2 SV=1	0.002	6.542	11	3	3	3	1	196	7.4	3	0	1.126	1.012	0.986	1.098	0.17	0.02	-0.02	0.13	0.0551325	0.466872	0.0911477	0.517882	0.428265	0.93185	0.571762	0.958043	530462	597514	536878	589303	High	High	High	High	270
High	Master Protein	Q9D1P0	39S ribosomal protein L13, mitochondrial OS=Mus musculus OX=10090 GN=Mrpl13 PE=1 SV=1	0	40.386	52	9	15	9	1	178	34.58	9	0	1.126	1.056	1.059	1.13	0.17	0.08	0.08	0.18	0.0566251	0.773644	0.380828	0.303045	0.433618	0.987205	0.91887	0.870663	952551	1.0727e+06	1.00551e+06	1.13633e+06	High	High	High	High	271
High	Master Protein	E9Q3E1	Aldehyde dehydrogenase family 3 member B2 OS=Mus musculus OX=10090 GN=Aldh3b2 PE=1 SV=1	0	30.183	14	6	7	6	1	479	18.88	6	0	1.126	0.879	0.936	1.2	0.17	-0.19	-0.1	0.26	0.0637369	0.0412492	0.0320976	0.137313	0.463224	0.344315	0.311079	0.668967	230028	259076	202096	242431	High	High	High	High	272
High	Master Protein	P50992	Potassium-transporting ATPase subunit beta OS=Mus musculus OX=10090 GN=Atp4b PE=1 SV=1	0	122.742	29	8	116	8	1	294	391.05	8	0	1.126	0.859	0.962	1.26	0.17	-0.22	-0.06	0.33	0.258241	0.0725443	0.247109	0.258965	0.853291	0.486247	0.858863	0.831822	9.06465e+07	1.02047e+08	7.78891e+07	9.81332e+07	High	High	High	High	273
Medium	Master Protein	E9Q414	Apolipoprotein B-100 OS=Mus musculus OX=10090 GN=Apob PE=1 SV=1	0.012	3.635	1	2	2	2	1	4505	2.31	2	0	1.126	0.913	1.292	1.592	0.17	-0.13	0.37	0.67	0.169628	0.190555	0.718558	0.00494389	0.746185	0.753568	0.986902	0.0853371	13192.8	14849	12050.4	19178.5	High	High	High	High	274
High	Master Protein	Q99NF1	Carotenoid-cleaving dioxygenase, mitochondrial OS=Mus musculus OX=10090 GN=Bco2 PE=1 SV=1	0.003	5.551	6	2	2	2	1	532	3.11	2	0	1.125	1.095	0.967	0.994	0.17	0.13	-0.05	-0.01	0.116801	0.92988	0.0626486	0.938828	0.636609	0.995494	0.468857	0.998852	36410.6	40972.8	39876	39634.6	High	High	High	High	275
High	Master Protein	Q9CQE3	28S ribosomal protein S17, mitochondrial OS=Mus musculus OX=10090 GN=Mrps17 PE=1 SV=1	0	28.265	52	4	6	4	1	120	21.31	4	0	1.125	1.058	1.009	1.073	0.17	0.08	0.01	0.1	0.0587794	0.838385	0.165023	0.712657	0.442842	0.991263	0.747941	0.970754	656281	738345	694336	744808	High	High	High	High	276
High	Master Protein	Q9CQC7	NADH dehydrogenase [ubiquinone] 1 beta subcomplex subunit 4 OS=Mus musculus OX=10090 GN=Ndufb4 PE=1 SV=3	0	82.085	55	9	63	9	1	129	228.58	9	0	1.125	1.005	1.004	1.124	0.17	0.01	0.01	0.17	0.260627	0.704416	0.435034	0.691064	0.853291	0.98508	0.951745	0.970324	1.13903e+07	1.28152e+07	1.14453e+07	1.28644e+07	High	High	High	High	277
High	Master Protein	Q9CQA3	Succinate dehydrogenase [ubiquinone] iron-sulfur subunit, mitochondrial OS=Mus musculus OX=10090 GN=Sdhb PE=1 SV=1	0	239.133	68	25	192	25	1	282	530.65	25	0	1.125	0.965	0.987	1.15	0.17	-0.05	-0.02	0.2	0.260691	0.458286	0.35075	0.587517	0.853291	0.930214	0.911286	0.96579	9.63579e+07	1.0841e+08	9.30232e+07	1.06951e+08	High	High	High	High	278
High	Master Protein	Q9D2G2	Dihydrolipoyllysine-residue succinyltransferase component of 2-oxoglutarate dehydrogenase complex, mitochondrial OS=Mus musculus OX=10090 GN=Dlst PE=1 SV=1	0	149.678	33	15	83	15	1	454	228.6	15	0	1.125	1.051	1.096	1.174	0.17	0.07	0.13	0.23	0.260384	0.979943	0.994446	0.498826	0.853291	0.999773	0.999985	0.953034	2.20341e+07	2.47919e+07	2.31523e+07	2.71809e+07	High	High	High	High	279
High	Master Protein	P00405	Cytochrome c oxidase subunit 2 OS=Mus musculus OX=10090 GN=Mtco2 PE=1 SV=1	0	123.513	31	6	158	6	1	227	449.59	6	0	1.125	0.98	1.029	1.182	0.17	-0.03	0.04	0.24	0.261625	0.543549	0.574467	0.473189	0.85388	0.958003	0.969841	0.944206	5.27314e+07	5.93129e+07	5.1667e+07	6.10463e+07	High	High	High	High	280
High	Master Protein	O88531	Palmitoyl-protein thioesterase 1 OS=Mus musculus OX=10090 GN=Ppt1 PE=1 SV=2	0	70.402	36	11	20	11	1	306	62.73	11	0	1.125	0.908	0.974	1.207	0.17	-0.14	-0.04	0.27	0.0429173	0.0282152	0.0741937	0.0907426	0.366971	0.265196	0.514309	0.5625	2.24763e+06	2.52853e+06	2.04183e+06	2.46405e+06	High	High	High	High	281
High	Master Protein	Q9QZA0	Carbonic anhydrase 5B, mitochondrial OS=Mus musculus OX=10090 GN=Ca5b PE=1 SV=2	0	59.472	28	10	17	10	1	317	57.01	10	0	1.125	0.964	1.047	1.221	0.17	-0.05	0.07	0.29	0.0384483	0.137654	0.278299	0.0613239	0.347229	0.665727	0.871933	0.466912	1.81889e+06	2.0456e+06	1.75391e+06	2.14109e+06	High	High	High	High	282
High	Master Protein	P56135	ATP synthase subunit f, mitochondrial OS=Mus musculus OX=10090 GN=Atp5mf PE=1 SV=3	0	35.336	33	3	31	3	1	88	70.29	3	0	1.124	0.987	1.028	1.171	0.17	-0.02	0.04	0.23	0.264997	0.589038	0.568768	0.5104	0.856234	0.968502	0.969841	0.954916	2.86297e+07	3.21761e+07	2.8261e+07	3.30848e+07	High	High	High	High	283
High	Master Protein	Q60597	2-oxoglutarate dehydrogenase complex component E1 OS=Mus musculus OX=10090 GN=Ogdh PE=1 SV=3	0	859.497	60	69	394	69	1	1023	1320.76	69	0	1.124	0.968	1.079	1.252	0.17	-0.05	0.11	0.32	0.264815	0.475804	0.880106	0.277105	0.856123	0.93855	0.990777	0.852279	5.97534e+07	6.71581e+07	5.78681e+07	7.24323e+07	High	High	High	High	284
High	Master Protein	P26443	Glutamate dehydrogenase 1, mitochondrial OS=Mus musculus OX=10090 GN=Glud1 PE=1 SV=1	0	272.273	52	29	124	29	1	558	404.86	29	0	1.124	0.818	1.031	1.418	0.17	-0.29	0.04	0.5	0.262889	0.0248469	0.585379	0.0593761	0.854774	0.245016	0.970956	0.458686	1.56743e+07	1.76251e+07	1.28178e+07	1.81732e+07	High	High	High	High	285
High	Master Protein	O08715	A-kinase anchor protein 1, mitochondrial OS=Mus musculus OX=10090 GN=Akap1 PE=1 SV=4	0	87.822	25	17	24	17	1	857	54.54	17	0	1.123	1.15	1.058	1.034	0.17	0.2	0.08	0.05	0.0536059	0.52878	0.332274	0.763804	0.420107	0.95201	0.910819	0.983332	1.60167e+06	1.79893e+06	1.84129e+06	1.90381e+06	High	High	High	High	286
High	Master Protein	P16332	Methylmalonyl-CoA mutase, mitochondrial OS=Mus musculus OX=10090 GN=Mmut PE=1 SV=2	0	263.823	50	32	105	32	1	748	292.35	32	0	1.123	1.014	1.051	1.165	0.17	0.02	0.07	0.22	0.267309	0.765155	0.707033	0.531807	0.858935	0.987135	0.986902	0.960721	9.69119e+06	1.08854e+07	9.82509e+06	1.14431e+07	High	High	High	High	287
High	Master Protein	Q99LX0	Parkinson disease protein 7 homolog OS=Mus musculus OX=10090 GN=Park7 PE=1 SV=1	0	79.523	60	11	25	11	1	189	60.75	11	0	1.123	1.018	1.191	1.314	0.17	0.03	0.25	0.39	0.0443671	0.384363	0.606148	0.0148337	0.376107	0.906777	0.971853	0.190815	2.78425e+06	3.12675e+06	2.8338e+06	3.72423e+06	High	High	High	High	288
High	Master Protein	Q60809	CCR4-NOT transcription complex subunit 7 OS=Mus musculus OX=10090 GN=Cnot7 PE=1 SV=1	0.007	4.548	8	2	3	2	1	285	2.61	2	0	1.123	1.384	1.616	1.311	0.17	0.47	0.69	0.39	0.169555	0.185295	0.0423281	0.0657537	0.746185	0.741169	0.370795	0.480514	13799.1	15492.6	19096.6	25034.5	High	High	High	High	289
High	Master Protein	P43277	Histone H1.3 OS=Mus musculus OX=10090 GN=H1-3 PE=1 SV=2	0	199.992	49	22	145	3	1	221	383.53	22	19	1.122	1.212	0.884	0.819	0.17	0.28	-0.18	-0.29	0.271684	0.188071	0.0580503	0.102148	0.860694	0.747915	0.454784	0.58041	3.67594e+08	4.12451e+08	4.45478e+08	3.64643e+08	High	High	High	High	290
High	Master Protein	Q9CR62	Mitochondrial 2-oxoglutarate/malate carrier protein OS=Mus musculus OX=10090 GN=Slc25a11 PE=1 SV=3	0	172.034	64	19	80	19	1	314	243.71	19	0	1.122	1.072	1.081	1.132	0.17	0.1	0.11	0.18	0.270812	0.837341	0.898683	0.65676	0.860694	0.991263	0.991662	0.970324	2.82652e+07	3.17211e+07	3.02969e+07	3.43041e+07	High	High	High	High	291
High	Master Protein	Q9Z2I8	Succinate--CoA ligase [GDP-forming] subunit beta, mitochondrial OS=Mus musculus OX=10090 GN=Suclg2 PE=1 SV=3	0	310.023	57	29	123	29	1	433	404.19	29	0	1.122	0.983	1.055	1.205	0.17	-0.03	0.08	0.27	0.271204	0.561192	0.729296	0.400467	0.860694	0.959868	0.986902	0.920105	2.16847e+07	2.43336e+07	2.1309e+07	2.56672e+07	High	High	High	High	292
High	Master Protein	P49722	Proteasome subunit alpha type-2 OS=Mus musculus OX=10090 GN=Psma2 PE=1 SV=3	0	64.203	44	8	13	8	1	234	41.71	8	0	1.122	1.084	1.202	1.244	0.17	0.12	0.27	0.32	0.0634727	0.990586	0.709274	0.0909238	0.462024	0.999773	0.986902	0.5625	608368	682423	659418	820383	High	High	High	High	293
High	Master Protein	Q01768	Nucleoside diphosphate kinase B OS=Mus musculus OX=10090 GN=Nme2 PE=1 SV=1	0	90.388	84	12	45	7	1	152	137.83	12	6	1.122	1	1.199	1.346	0.17	0	0.26	0.43	0.272385	0.669625	0.435952	0.120857	0.860803	0.97834	0.951745	0.632443	1.00373e+07	1.12603e+07	1.00332e+07	1.35022e+07	High	High	High	High	294
High	Master Protein	Q8K019	Bcl-2-associated transcription factor 1 OS=Mus musculus OX=10090 GN=Bclaf1 PE=1 SV=2	0	42.088	13	13	16	12	1	919	29.02	13	0	1.122	1.007	1.255	1.399	0.17	0.01	0.33	0.48	0.047685	0.372402	0.344193	0.00279287	0.391828	0.903142	0.911286	0.0536461	1.09238e+06	1.22555e+06	1.09973e+06	1.53814e+06	High	High	High	High	295
High	Master Protein	P70704	Phospholipid-transporting ATPase IA OS=Mus musculus OX=10090 GN=Atp8a1 PE=1 SV=2	0	18.579	5	5	9	4	1	1164	12.49	5	0	1.121	1.117	0.922	0.925	0.16	0.16	-0.12	-0.11	0.136127	0.938839	0.0329954	0.51103	0.684872	0.995494	0.316093	0.954916	59913.6	67168.5	66919.5	61917.3	High	High	High	High	296
High	Master Protein	Q61205	Platelet-activating factor acetylhydrolase IB subunit alpha1 OS=Mus musculus OX=10090 GN=Pafah1b3 PE=1 SV=1	0	34.995	30	7	17	7	1	232	47.94	7	0	1.121	1.245	1.063	0.957	0.16	0.32	0.09	-0.06	0.0616637	0.118143	0.361565	0.659161	0.455122	0.621477	0.915503	0.970324	1.43313e+06	1.6061e+06	1.78486e+06	1.70785e+06	High	High	High	High	297
High	Master Protein	Q6P3A8	2-oxoisovalerate dehydrogenase subunit beta, mitochondrial OS=Mus musculus OX=10090 GN=Bckdhb PE=1 SV=2	0	158.746	48	14	60	14	1	390	164.23	14	0	1.121	0.987	0.88	1	0.16	-0.02	-0.18	0	0.211549	0.416818	0.0135752	0.969971	0.800392	0.918636	0.170192	0.999848	6.05093e+06	6.78386e+06	5.97249e+06	5.97171e+06	High	High	High	High	298
High	Master Protein	P24452	Macrophage-capping protein OS=Mus musculus OX=10090 GN=Capg PE=1 SV=2	0	60.165	30	8	19	8	1	352	54.63	8	0	1.121	1.241	1.193	1.077	0.16	0.31	0.25	0.11	0.0616035	0.117258	0.757105	0.620859	0.455122	0.620637	0.986902	0.96579	768864	861856	954328	1.02781e+06	High	High	High	High	299
High	Master Protein	Q91YT0	NADH dehydrogenase [ubiquinone] flavoprotein 1, mitochondrial OS=Mus musculus OX=10090 GN=Ndufv1 PE=1 SV=1	0	327.555	72	31	164	31	1	464	555.48	31	0	1.121	1.013	0.985	1.091	0.17	0.02	-0.02	0.13	0.273811	0.760274	0.345123	0.837819	0.860803	0.986474	0.911286	0.993296	6.14522e+07	6.89155e+07	6.22573e+07	6.79033e+07	High	High	High	High	300
High	Master Protein	Q8BR63	Protein FAM177A1 OS=Mus musculus OX=10090 GN=Fam177a1 PE=1 SV=1	0	27.073	31	5	5	5	1	207	18.36	5	0	1.121	1.104	1.143	1.16	0.16	0.14	0.19	0.21	0.123407	0.933408	0.831375	0.277654	0.648653	0.995494	0.990777	0.852279	129311	144896	142728	165558	High	High	High	High	301
High	Master Protein	Q60I26	ALS2 C-terminal-like protein OS=Mus musculus OX=10090 GN=Als2cl PE=1 SV=1	0.001	7.801	2	2	2	2	1	952	4.3	2	0	1.12	1.158	1.023	0.989	0.16	0.21	0.03	-0.02	0.25355	0.936896	0.328561	0.927982	0.848961	0.995494	0.910807	0.997966	5338.83	5978.2	6181.61	6116.56	High	High	High	High	302
High	Master Protein	P03888	NADH-ubiquinone oxidoreductase chain 1 OS=Mus musculus OX=10090 GN=Mtnd1 PE=1 SV=3	0	80.586	15	6	28	6	1	318	104.95	6	0	1.12	1.061	1.035	1.093	0.16	0.08	0.05	0.13	0.04502	0.725556	0.351402	0.429915	0.379021	0.98508	0.911286	0.923833	3.17441e+06	3.55533e+06	3.36692e+06	3.67925e+06	High	High	High	High	303
High	Master Protein	Q924M7	Mannose-6-phosphate isomerase OS=Mus musculus OX=10090 GN=Mpi PE=1 SV=1	0	16.917	11	4	5	4	1	423	12.46	4	0	1.12	1.081	1.08	1.119	0.16	0.11	0.11	0.16	0.122508	0.907556	0.493543	0.393857	0.647818	0.995494	0.957561	0.920105	115807	129696	125204	140048	High	High	High	High	304
High	Master Protein	Q9D6R2	Isocitrate dehydrogenase [NAD] subunit alpha, mitochondrial OS=Mus musculus OX=10090 GN=Idh3a PE=1 SV=1	0	194.602	55	23	134	23	1	366	333.54	23	0	1.12	0.942	1	1.189	0.16	-0.09	0	0.25	0.279234	0.335015	0.416364	0.447998	0.866147	0.896637	0.941215	0.930052	3.8276e+07	4.28687e+07	3.60545e+07	4.2876e+07	High	High	High	High	305
High	Master Protein	O35400	Sulfotransferase 2B1 OS=Mus musculus OX=10090 GN=Sult2b1 PE=1 SV=2	0	12.982	15	5	6	4	1	338	14.24	5	0	1.119	1.365	1.145	0.939	0.16	0.45	0.2	-0.09	0.122052	0.041507	0.835808	0.600598	0.647818	0.345476	0.990777	0.96579	127490	142678	174014	163349	High	High	High	High	306
High	Master Protein	Q9EQ20	Methylmalonate-semialdehyde dehydrogenase [acylating], mitochondrial OS=Mus musculus OX=10090 GN=Aldh6a1 PE=1 SV=1	0	568.775	69	38	262	38	1	535	989.73	38	0	1.119	1.017	1.101	1.21	0.16	0.02	0.14	0.28	0.284655	0.78821	0.978658	0.38366	0.873166	0.988107	0.999773	0.913628	8.72589e+07	9.76033e+07	8.8759e+07	1.07421e+08	High	High	High	High	307
High	Master Protein	Q99LC5	Electron transfer flavoprotein subunit alpha, mitochondrial OS=Mus musculus OX=10090 GN=Etfa PE=1 SV=2	0	282.216	66	22	129	22	1	333	435.74	22	0	1.119	0.889	1.033	1.299	0.16	-0.17	0.05	0.38	0.283515	0.137833	0.594111	0.185293	0.872928	0.665741	0.970956	0.741712	3.38797e+07	3.79062e+07	3.01319e+07	3.91414e+07	High	High	High	High	308
High	Master Protein	P17710	Hexokinase-1 OS=Mus musculus OX=10090 GN=Hk1 PE=1 SV=3	0	414.006	49	48	181	45	1	974	572.97	48	6	1.119	1.072	1.324	1.382	0.16	0.1	0.41	0.47	0.284378	0.834891	0.0987127	0.0854404	0.873099	0.991263	0.601062	0.545562	3.28763e+07	3.67762e+07	3.52516e+07	4.87062e+07	High	High	High	High	309
High	Master Protein	Q9CQ69	Cytochrome b-c1 complex subunit 8 OS=Mus musculus OX=10090 GN=Uqcrq PE=1 SV=3	0	54.804	48	6	47	6	1	82	117.59	6	0	1.118	1.04	1.085	1.167	0.16	0.06	0.12	0.22	0.286753	0.946905	0.924031	0.524901	0.875812	0.995981	0.992522	0.958135	2.6389e+07	2.95029e+07	2.74487e+07	3.20217e+07	High	High	High	High	310
High	Master Protein	Q8R164	Valacyclovir hydrolase OS=Mus musculus OX=10090 GN=Bphl PE=1 SV=1	0	109.734	60	15	44	15	1	291	113.12	15	0	1.118	0.988	1.059	1.198	0.16	-0.02	0.08	0.26	0.0526595	0.225332	0.440334	0.120208	0.418734	0.790496	0.954324	0.630521	2.61369e+06	2.92175e+06	2.58351e+06	3.09434e+06	High	High	High	High	311
High	Master Protein	Q9CRT8	Exportin-T OS=Mus musculus OX=10090 GN=Xpot PE=1 SV=3	0	25.798	8	6	9	6	1	963	19.79	6	0	1.117	1.145	0.808	0.787	0.16	0.2	-0.31	-0.34	0.105135	0.669939	0.000989829	0.0625365	0.602916	0.97834	0.021318	0.467577	162847	181848	186526	146867	High	High	High	High	312
High	Master Protein	Q9D8B4	NADH dehydrogenase [ubiquinone] 1 alpha subcomplex subunit 11 OS=Mus musculus OX=10090 GN=Ndufa11 PE=1 SV=2	0	102.047	54	6	35	6	1	141	144.27	6	0	1.117	1.08	0.943	0.976	0.16	0.11	-0.08	-0.04	0.0837464	0.996577	0.0743557	0.842371	0.530227	0.999773	0.514464	0.993612	4.35682e+06	4.86639e+06	4.70402e+06	4.59117e+06	High	High	High	High	313
High	Master Protein	P51881	ADP/ATP translocase 2 OS=Mus musculus OX=10090 GN=Slc25a5 PE=1 SV=3	0	330.743	76	29	300	17	1	298	824.45	29	16	1.117	0.991	0.955	1.077	0.16	-0.01	-0.07	0.11	0.28883	0.610907	0.221846	0.901836	0.875812	0.973406	0.838892	0.995594	7.43247e+08	8.30545e+08	7.36229e+08	7.92867e+08	High	High	High	High	314
High	Master Protein	Q9CPR5	39S ribosomal protein L15, mitochondrial OS=Mus musculus OX=10090 GN=Mrpl15 PE=1 SV=1	0	42.91	42	10	14	10	1	295	31.59	10	0	1.117	1.058	1.044	1.102	0.16	0.08	0.06	0.14	0.0542666	0.717171	0.290236	0.356237	0.423223	0.98508	0.884554	0.890202	1.22552e+06	1.36939e+06	1.29648e+06	1.42922e+06	High	High	High	High	315
High	Master Protein	Q9DC69	NADH dehydrogenase [ubiquinone] 1 alpha subcomplex subunit 9, mitochondrial OS=Mus musculus OX=10090 GN=Ndufa9 PE=1 SV=2	0	239.27	72	27	134	27	1	377	392.4	27	0	1.117	1.005	1.007	1.118	0.16	0.01	0.01	0.16	0.29154	0.707956	0.449736	0.715543	0.876704	0.98508	0.955524	0.971015	4.62488e+07	5.16484e+07	4.64964e+07	5.19932e+07	High	High	High	High	316
High	Master Protein	P46735	Unconventional myosin-Ib OS=Mus musculus OX=10090 GN=Myo1b PE=1 SV=3	0	286.017	46	51	107	46	1	1107	289.21	51	0	1.117	1.017	1.041	1.144	0.16	0.02	0.06	0.19	0.292229	0.785197	0.64711	0.610889	0.876704	0.988107	0.984034	0.96579	1.05712e+07	1.18035e+07	1.07483e+07	1.22929e+07	High	High	High	High	317
High	Master Protein	Q9DCA2	28S ribosomal protein S11, mitochondrial OS=Mus musculus OX=10090 GN=Mrps11 PE=1 SV=2	0	35.043	29	5	6	5	1	191	22.27	5	0	1.116	1.115	1.023	1.025	0.16	0.16	0.03	0.04	0.0688192	0.809386	0.224782	0.872317	0.485662	0.991263	0.844385	0.995594	1.04491e+06	1.16643e+06	1.16461e+06	1.19356e+06	High	High	High	High	318
High	Master Protein	Q9ERS2	NADH dehydrogenase [ubiquinone] 1 alpha subcomplex subunit 13 OS=Mus musculus OX=10090 GN=Ndufa13 PE=1 SV=3	0	165.906	67	12	105	12	1	144	371.91	12	0	1.116	0.992	1.001	1.126	0.16	-0.01	0	0.17	0.295183	0.619721	0.418482	0.684519	0.876704	0.97492	0.942111	0.970324	1.35156e+07	1.50809e+07	1.34066e+07	1.50898e+07	High	High	High	High	319
High	Master Protein	Q99KR8	Plasma alpha-L-fucosidase OS=Mus musculus OX=10090 GN=Fuca2 PE=1 SV=1	0	25.935	18	7	7	7	1	461	20.24	7	0	1.116	1.039	1.11	1.192	0.16	0.06	0.15	0.25	0.0752771	0.671415	0.668422	0.227315	0.505483	0.978969	0.986778	0.790897	626465	699285	651012	776312	High	High	High	High	320
High	Master Protein	Q78IQ7	Zinc transporter ZIP4 OS=Mus musculus OX=10090 GN=Slc39a4 PE=1 SV=1	0	16.879	6	3	4	3	1	660	13.41	3	0	1.115	0.752	0.698	1.035	0.16	-0.41	-0.52	0.05	0.125258	0.00144622	1.58171e-05	0.794904	0.654536	0.0263765	0.000554076	0.986585	93580.9	104303	70337.4	72789.7	High	High	High	High	321
High	Master Protein	Q60931	Voltage-dependent anion-selective channel protein 3 OS=Mus musculus OX=10090 GN=Vdac3 PE=1 SV=1	0	224.788	66	18	97	17	1	283	311.88	18	0	1.115	1	0.943	1.051	0.16	0	-0.08	0.07	0.300249	0.669429	0.183184	0.97501	0.877483	0.97834	0.778135	0.999848	3.43934e+07	3.8332e+07	3.43781e+07	3.61398e+07	High	High	High	High	322
High	Master Protein	Q8C1E7	Ion channel TACAN OS=Mus musculus OX=10090 GN=Tmem120a PE=1 SV=1	0	37.401	13	5	8	5	1	343	22	5	0	1.115	1.076	1.432	1.485	0.16	0.11	0.52	0.57	0.100204	0.926929	0.0505968	0.00140268	0.596066	0.995494	0.416358	0.0305594	194538	216933	209229	310709	High	High	High	High	323
High	Master Protein	P14148	60S ribosomal protein L7 OS=Mus musculus OX=10090 GN=Rpl7 PE=1 SV=2	0	150.551	59	26	73	25	1	270	215.27	26	0	1.114	1.289	1.077	0.931	0.16	0.37	0.11	-0.1	0.301613	0.0605324	0.87213	0.417947	0.877483	0.435864	0.990777	0.920105	2.07134e+07	2.30784e+07	2.67061e+07	2.48621e+07	High	High	High	High	324
High	Master Protein	A2ADY9	Protein DDI1 homolog 2 OS=Mus musculus OX=10090 GN=Ddi2 PE=1 SV=1	0	22.243	21	8	10	8	1	399	17.18	8	0	1.114	1.005	0.878	0.973	0.16	0.01	-0.19	-0.04	0.0773423	0.468785	0.00722248	0.70293	0.508411	0.933246	0.106867	0.970324	656663	731806	660178	642411	High	High	High	High	325
High	Master Protein	Q921M3	Splicing factor 3B subunit 3 OS=Mus musculus OX=10090 GN=Sf3b3 PE=1 SV=1	0	160.718	32	35	52	35	1	1217	131.22	35	0	1.114	1.081	1.241	1.28	0.16	0.11	0.31	0.36	0.102737	0.992723	0.314872	0.0685598	0.596748	0.999773	0.901141	0.489653	4.60776e+06	5.13514e+06	4.98099e+06	6.37461e+06	High	High	High	High	326
High	Master Protein	P63163	Small nuclear ribonucleoprotein-associated protein N OS=Mus musculus OX=10090 GN=Snrpn PE=1 SV=1	0	34.247	25	7	14	7	1	240	31.48	7	0	1.114	1.124	1.298	1.286	0.16	0.17	0.38	0.36	0.0659555	0.720344	0.179784	0.0238454	0.472411	0.98508	0.77383	0.261657	1.16355e+06	1.29628e+06	1.30832e+06	1.68197e+06	High	High	High	High	327
High	Master Protein	Q99JY0	Trifunctional enzyme subunit beta, mitochondrial OS=Mus musculus OX=10090 GN=Hadhb PE=1 SV=1	0	435.272	63	28	239	27	1	475	753.49	28	1	1.113	1.053	1.012	1.07	0.15	0.08	0.02	0.1	0.305134	0.961582	0.480106	0.935025	0.877483	0.998445	0.957561	0.997966	6.85184e+07	7.62807e+07	7.21792e+07	7.72263e+07	High	High	High	High	328
High	Master Protein	Q9DBR7	Protein phosphatase 1 regulatory subunit 12A OS=Mus musculus OX=10090 GN=Ppp1r12a PE=1 SV=2	0	18.891	7	7	7	7	1	1029	12.06	7	0	1.113	1.15	1.154	1.116	0.15	0.2	0.21	0.16	0.0923129	0.587919	0.891625	0.400587	0.567539	0.968502	0.991522	0.920105	223028	248188	256450	286296	High	High	High	High	329
High	Master Protein	Q9JII5	DAZ-associated protein 1 OS=Mus musculus OX=10090 GN=Dazap1 PE=1 SV=2	0	18.842	12	3	4	3	1	406	13.77	3	0	1.113	1.004	1.155	1.28	0.15	0.01	0.21	0.36	0.114907	0.4416	0.891677	0.0597006	0.631269	0.926837	0.991522	0.459971	156349	174067	157048	201095	High	High	High	High	330
High	Master Protein	Q9QUR6	Prolyl endopeptidase OS=Mus musculus OX=10090 GN=Prep PE=1 SV=1	0	55.702	21	12	17	12	1	710	52.76	12	0	1.113	0.837	1.034	1.377	0.16	-0.26	0.05	0.46	0.0708111	0.00447373	0.264323	0.00478877	0.493388	0.0675918	0.863956	0.083402	941397	1.04822e+06	787617	1.08438e+06	High	High	High	High	331
High	Master Protein	Q8BGS0	Protein MAK16 homolog OS=Mus musculus OX=10090 GN=Mak16 PE=1 SV=1	0	14.836	13	3	4	3	1	296	10.89	3	0	1.112	1.162	0.998	0.955	0.15	0.22	0	-0.07	0.0920705	0.527246	0.128741	0.580542	0.566648	0.95201	0.675049	0.96579	223797	248930	260163	248498	High	High	High	High	332
High	Master Protein	Q99LQ7	Plasmanylethanolamine desaturase OS=Mus musculus OX=10090 GN=PEDS1 PE=1 SV=1	0	36.008	26	6	10	6	1	271	22.31	6	0	1.112	1.08	0.964	0.992	0.15	0.11	-0.05	-0.01	0.082288	0.982502	0.0649288	0.817182	0.52707	0.999773	0.479747	0.990603	681004	757464	735624	730069	High	High	High	High	333
High	Master Protein	Q9CZB0	Succinate dehydrogenase cytochrome b560 subunit, mitochondrial OS=Mus musculus OX=10090 GN=Sdhc PE=1 SV=1	0	32.845	20	3	10	3	1	169	38.8	3	0	1.112	1.058	1.022	1.073	0.15	0.08	0.03	0.1	0.0520633	0.700483	0.28281	0.526407	0.415934	0.98508	0.874289	0.958135	3.23251e+06	3.59307e+06	3.42106e+06	3.6704e+06	High	High	High	High	334
High	Master Protein	O08811	General transcription and DNA repair factor IIH helicase subunit XPD OS=Mus musculus OX=10090 GN=Ercc2 PE=1 SV=2	0	11.623	6	3	3	3	1	760	2.83	3	0	1.112	1.346	1.318	1.088	0.15	0.43	0.4	0.12	0.199641	0.239397	0.636702	0.573423	0.778747	0.817287	0.982252	0.96579	11434.5	12714	15396.4	16751.4	High	High	High	High	335
High	Master Protein	P70158	Acid sphingomyelinase-like phosphodiesterase 3a OS=Mus musculus OX=10090 GN=Smpdl3a PE=1 SV=2	0	19.413	11	7	7	7	1	445	15.61	7	0	1.112	1.12	1.246	1.236	0.15	0.16	0.32	0.31	0.0740029	0.641912	0.434292	0.0587478	0.505483	0.97492	0.951745	0.457478	874531	972059	979855	1.21073e+06	High	High	High	High	336
High	Master Protein	Q920A5	Retinoid-inducible serine carboxypeptidase OS=Mus musculus OX=10090 GN=Scpep1 PE=1 SV=2	0	23.546	15	6	7	6	1	452	12.8	6	0	1.11	1.242	1.079	0.964	0.15	0.31	0.11	-0.05	0.131606	0.231767	0.467643	0.729108	0.673192	0.800251	0.957326	0.975648	148774	165109	184790	178082	High	High	High	High	337
High	Master Protein	P15626	Glutathione S-transferase Mu 2 OS=Mus musculus OX=10090 GN=Gstm2 PE=1 SV=2	0	121.193	77	18	59	12	1	218	176.06	18	5	1.11	0.922	0.916	1.103	0.15	-0.12	-0.13	0.14	0.317864	0.242641	0.113292	0.766495	0.892559	0.819536	0.639605	0.983771	9.35594e+06	1.03865e+07	8.62257e+06	9.51465e+06	High	High	High	High	338
High	Master Protein	Q5U4D9	THO complex subunit 6 homolog OS=Mus musculus OX=10090 GN=Thoc6 PE=1 SV=1	0	10.546	12	3	3	3	1	341	6.99	3	0	1.11	1.178	1.196	1.127	0.15	0.24	0.26	0.17	0.134939	0.713263	0.883308	0.382345	0.680991	0.98508	0.990777	0.911517	20837.1	23138.2	24556.2	27681.3	High	High	High	High	339
High	Master Protein	P63028	Translationally-controlled tumor protein OS=Mus musculus OX=10090 GN=Tpt1 PE=1 SV=1	0	48.42	35	6	21	6	1	172	50.75	6	0	1.11	0.968	0.989	1.134	0.15	-0.05	-0.02	0.18	0.0705504	0.154648	0.105812	0.288338	0.492593	0.6991	0.621964	0.85925	2.39008e+06	2.6528e+06	2.31338e+06	2.62372e+06	High	High	High	High	340
High	Master Protein	P32261	Antithrombin-III OS=Mus musculus OX=10090 GN=Serpinc1 PE=1 SV=1	0	26.323	21	9	9	9	1	465	19.02	9	0	1.11	0.965	1	1.151	0.15	-0.05	0	0.2	0.0889863	0.2605	0.140546	0.35505	0.551753	0.838125	0.700921	0.889701	679784	754755	655871	755067	High	High	High	High	341
High	Master Protein	Q2KHK6	Gasdermin-C2 OS=Mus musculus OX=10090 GN=Gsdmc2 PE=2 SV=2	0	26.248	15	7	10	7	1	480	22.31	7	0	1.11	1.488	1.734	1.293	0.15	0.57	0.79	0.37	0.0766241	0.000219738	7.19899e-06	0.0302307	0.506907	0.00526106	0.000270078	0.302151	1.49479e+06	1.65877e+06	2.22439e+06	2.87683e+06	High	High	High	High	342
High	Master Protein	A2TJV2	Paralemmin-3 OS=Mus musculus OX=10090 GN=Palm3 PE=1 SV=1	0	12.781	5	3	3	3	1	734	6.21	3	0	1.109	1.168	1.081	1.027	0.15	0.22	0.11	0.04	0.0618459	0.499043	0.405796	0.967028	0.455311	0.944906	0.938626	0.999848	293801	325920	343295	352467	High	High	High	High	343
High	Master Protein	Q9CQ75	NADH dehydrogenase [ubiquinone] 1 alpha subcomplex subunit 2 OS=Mus musculus OX=10090 GN=Ndufa2 PE=1 SV=3	0	62.471	70	10	55	9	1	99	133.79	10	1	1.109	0.975	0.977	1.111	0.15	-0.04	-0.03	0.15	0.321113	0.51579	0.307208	0.746641	0.894948	0.95004	0.894895	0.978301	2.56628e+07	2.84693e+07	2.50273e+07	2.78061e+07	High	High	High	High	344
High	Master Protein	Q9CPW4	Actin-related protein 2/3 complex subunit 5 OS=Mus musculus OX=10090 GN=Arpc5 PE=1 SV=3	0	68.562	57	10	25	10	1	151	84.16	10	0	1.109	1.097	1.183	1.196	0.15	0.13	0.24	0.26	0.118894	0.851696	0.615579	0.189884	0.641537	0.993839	0.975632	0.747234	4.73469e+06	5.2493e+06	5.19513e+06	6.21098e+06	High	High	High	High	345
High	Master Protein	O08786	Cholecystokinin receptor type A OS=Mus musculus OX=10090 GN=Cckar PE=1 SV=1	0.001	8.359	5	2	2	2	1	436	2.22	2	0	1.108	1.555	0.909	0.648	0.15	0.64	-0.14	-0.63	0.173663	0.0160698	0.0279206	0.00109525	0.749276	0.180752	0.28065	0.0255867	27056.9	29989.9	42076.6	27256.7	High	High	High	High	346
High	Master Protein	Q9D7J4	Cytochrome c oxidase assembly protein COX20, mitochondrial OS=Mus musculus OX=10090 GN=Cox20 PE=1 SV=1	0	19.411	23	2	9	2	1	117	34.27	2	0	1.108	0.991	0.937	1.047	0.15	-0.01	-0.09	0.07	0.0690267	0.360232	0.0202429	0.777916	0.485662	0.900656	0.225071	0.986585	373735	414037	370355	387840	High	High	High	High	347
High	Master Protein	Q8BMS4	Ubiquinone biosynthesis O-methyltransferase, mitochondrial OS=Mus musculus OX=10090 GN=Coq3 PE=1 SV=1	0	39.221	26	7	9	7	1	370	25.2	7	0	1.108	1.054	1.025	1.077	0.15	0.08	0.04	0.11	0.0866005	0.736323	0.213749	0.560615	0.541317	0.98508	0.831326	0.96579	1.01657e+06	1.12655e+06	1.07166e+06	1.1545e+06	High	High	High	High	348
High	Master Protein	Q8R4N0	Citramalyl-CoA lyase, mitochondrial OS=Mus musculus OX=10090 GN=Clybl PE=1 SV=2	0	205.698	59	24	72	24	1	338	236.35	24	0	1.108	1.041	1.097	1.166	0.15	0.06	0.13	0.22	0.327179	0.909553	0.977949	0.510186	0.895831	0.995494	0.999773	0.954916	8.03184e+06	8.89853e+06	8.36513e+06	9.75775e+06	High	High	High	High	349
High	Master Protein	Q80YV3	Transformation/transcription domain-associated protein OS=Mus musculus OX=10090 GN=Trrap PE=1 SV=2	0	11.121	2	5	5	4	1	2565	7.38	5	0	1.108	1.023	1.378	1.493	0.15	0.03	0.46	0.58	0.158888	0.518041	0.231832	0.00107022	0.728781	0.95004	0.845195	0.0252042	47742.1	52919.8	48840.7	72926.9	High	High	High	High	350
High	Master Protein	Q3UHC7	Disabled homolog 2-interacting protein OS=Mus musculus OX=10090 GN=Dab2ip PE=1 SV=1	0	10.317	3	3	3	3	1	1189	5.05	3	0	1.107	1.756	1.375	0.867	0.15	0.81	0.46	-0.21	0.242711	0.00784367	0.514207	0.484866	0.842749	0.10588	0.959125	0.948693	6821.62	7552.73	11980.2	10383.5	High	High	High	High	351
High	Master Protein	Q8VD04	GRIP1-associated protein 1 OS=Mus musculus OX=10090 GN=Gripap1 PE=1 SV=1	0.002	7.532	4	3	3	3	1	806	2.22	3	0	1.107	0.932	1.165	1.384	0.15	-0.1	0.22	0.47	0.136349	0.150671	0.958862	0.0148208	0.685008	0.689986	0.996516	0.190815	148616	164488	138485	191664	High	High	High	High	352
High	Master Protein	Q8BVY0	Ribosomal L1 domain-containing protein 1 OS=Mus musculus OX=10090 GN=Rsl1d1 PE=1 SV=1	0	70.657	40	16	23	16	1	452	62.12	16	0	1.106	1.313	1.129	0.951	0.15	0.39	0.17	-0.07	0.0744625	0.034481	0.833938	0.678231	0.505483	0.298169	0.990777	0.970324	2.08669e+06	2.30828e+06	2.7404e+06	2.60559e+06	High	High	High	High	353
High	Master Protein	Q8JZK9	Hydroxymethylglutaryl-CoA synthase, cytoplasmic OS=Mus musculus OX=10090 GN=Hmgcs1 PE=1 SV=1	0	111.436	31	15	32	14	1	520	91.69	15	1	1.106	1.118	1.076	1.064	0.15	0.16	0.11	0.09	0.0609555	0.74011	0.57262	0.564193	0.45237	0.98508	0.969841	0.96579	3.21379e+06	3.5541e+06	3.59148e+06	3.82279e+06	High	High	High	High	354
High	Master Protein	Q8K2B3	Succinate dehydrogenase [ubiquinone] flavoprotein subunit, mitochondrial OS=Mus musculus OX=10090 GN=Sdha PE=1 SV=1	0	489.402	66	36	307	36	1	664	1167.7	36	0	1.106	0.981	0.98	1.106	0.15	-0.03	-0.03	0.14	0.333608	0.549405	0.321813	0.770442	0.899426	0.958738	0.905342	0.985882	9.074e+07	1.00394e+08	8.8995e+07	9.83945e+07	High	High	High	High	355
High	Master Protein	Q9D281	Protein Noxp20 OS=Mus musculus OX=10090 GN=Fam114a1 PE=1 SV=1	0	33.132	11	5	8	5	1	569	21.19	5	0	1.105	1.357	1.11	0.904	0.14	0.44	0.15	-0.15	0.153097	0.0633473	0.637181	0.415084	0.718505	0.447275	0.982252	0.920105	114845	126910	155821	140838	High	High	High	High	356
High	Master Protein	Q9JMC8	Band 4.1-like protein 4B OS=Mus musculus OX=10090 GN=Epb41l4b PE=1 SV=2	0	21.222	14	7	9	5	1	527	16.16	7	0	1.105	1.131	0.973	0.95	0.14	0.18	-0.04	-0.07	0.143302	0.8037	0.11263	0.695039	0.70104	0.990901	0.637104	0.970324	108429	119852	122675	116589	High	High	High	High	357
High	Master Protein	Q9D882	Protein FAM241B OS=Mus musculus OX=10090 GN=Fam241b PE=1 SV=1	0.008	4.519	18	2	4	2	1	120	8.37	2	0	1.105	1.027	0.903	0.973	0.14	0.04	-0.15	-0.04	0.0929461	0.60192	0.0136845	0.675404	0.569228	0.97169	0.170396	0.970324	663194	732894	680811	662123	High	High	High	High	358
High	Master Protein	A2RST1	Microsomal glutathione S-transferase 2 OS=Mus musculus OX=10090 GN=Mgst2 PE=2 SV=1	0	14.003	18	2	3	2	1	147	9.85	2	0	1.105	1.196	1.124	1.038	0.14	0.26	0.17	0.05	0.151196	0.58311	0.513434	0.78641	0.714923	0.967538	0.959125	0.986585	41188	45493.2	49241.4	51136.7	High	High	High	High	359
High	Master Protein	Q9DB10	Essential MCU regulator, mitochondrial OS=Mus musculus OX=10090 GN=Smdt1 PE=1 SV=1	0	9.677	36	3	7	3	1	107	17.13	3	0	1.105	0.975	0.921	1.044	0.14	-0.04	-0.12	0.06	0.0685074	0.166848	0.0176033	0.677265	0.485309	0.723787	0.203505	0.970324	2.33397e+06	2.57977e+06	2.27449e+06	2.3753e+06	High	High	High	High	360
High	Master Protein	Q99M28	RNA-binding protein with serine-rich domain 1 OS=Mus musculus OX=10090 GN=Rnps1 PE=1 SV=1	0	31.742	23	5	11	5	1	305	38.17	5	0	1.105	1.13	1.077	1.053	0.14	0.18	0.11	0.07	0.0965281	0.652217	0.446978	0.802571	0.583894	0.97492	0.955524	0.986585	689777	762058	779503	820460	High	High	High	High	361
High	Master Protein	P48962	ADP/ATP translocase 1 OS=Mus musculus OX=10090 GN=Slc25a4 PE=1 SV=4	0	314.545	66	23	226	11	1	298	642.39	23	0	1.105	0.986	0.981	1.1	0.14	-0.02	-0.03	0.14	0.339354	0.580354	0.325932	0.796603	0.908549	0.966108	0.907787	0.986585	5.6316e+07	6.22318e+07	5.55132e+07	6.10511e+07	High	High	High	High	362
High	Master Protein	Q9Z2K1	Keratin, type I cytoskeletal 16 OS=Mus musculus OX=10090 GN=Krt16 PE=1 SV=3	0	47.972	14	8	47	3	1	469	99.4	8	0	1.105	0.945	1.483	1.734	0.14	-0.08	0.57	0.79	0.103777	0.179422	0.0222374	2.09548e-06	0.59961	0.735643	0.23899	0.00010685	226557	250307	214085	371172	High	High	High	High	363
High	Master Protein	Q9DC48	Pre-mRNA-processing factor 17 OS=Mus musculus OX=10090 GN=Cdc40 PE=1 SV=1	0.009	4.297	3	2	2	2	1	579	3.59	2	0	1.104	1.24	1.085	0.966	0.14	0.31	0.12	-0.05	0.147075	0.477137	0.378192	0.799437	0.706754	0.938653	0.91735	0.986585	20585.6	22722	25534.4	24662.1	High	High	High	High	364
High	Master Protein	Q8K3J1	NADH dehydrogenase [ubiquinone] iron-sulfur protein 8, mitochondrial OS=Mus musculus OX=10090 GN=Ndufs8 PE=1 SV=1	0	98.08	40	11	80	11	1	212	199.83	11	0	1.104	0.976	0.974	1.101	0.14	-0.03	-0.04	0.14	0.344536	0.522924	0.294629	0.791994	0.914521	0.951102	0.887903	0.986585	2.52696e+07	2.78939e+07	2.46738e+07	2.71606e+07	High	High	High	High	365
High	Master Protein	Q99LJ1	Tissue alpha-L-fucosidase OS=Mus musculus OX=10090 GN=Fuca1 PE=1 SV=1	0	28.207	15	6	8	6	1	452	20.39	6	0	1.104	1.218	1.242	1.127	0.14	0.28	0.31	0.17	0.0973219	0.182797	0.479157	0.372103	0.58534	0.740027	0.957561	0.902866	757966	837122	922929	1.03995e+06	High	High	High	High	366
High	Master Protein	Q8BP48	Methionine aminopeptidase 1 OS=Mus musculus OX=10090 GN=Metap1 PE=1 SV=1	0	30.782	21	7	8	7	1	386	18.62	7	0	1.104	1.051	1.118	1.174	0.14	0.07	0.16	0.23	0.0747841	0.753474	0.625152	0.217874	0.505483	0.98508	0.981049	0.783404	277789	306557	291972	342777	High	High	High	High	367
High	Master Protein	P15864	Histone H1.2 OS=Mus musculus OX=10090 GN=H1-2 PE=1 SV=2	0	201.78	48	20	133	6	1	212	378.73	20	0	1.103	1.161	0.856	0.813	0.14	0.22	-0.22	-0.3	0.34609	0.353977	0.0291073	0.0939508	0.914521	0.897776	0.288838	0.566883	4.79953e+07	5.29626e+07	5.57149e+07	4.53184e+07	High	High	High	High	368
High	Master Protein	Q9CR63	Cytochrome c oxidase assembly protein COX16 homolog, mitochondrial OS=Mus musculus OX=10090 GN=Cox16 PE=3 SV=1	0	14.187	22	2	4	2	1	106	13.63	2	0	1.103	1.25	1.016	0.897	0.14	0.32	0.02	-0.16	0.0759397	0.196489	0.155427	0.278562	0.505483	0.762552	0.730053	0.852279	335990	370654	419990	376574	High	High	High	High	369
High	Master Protein	Q9D8T7	SRA stem-loop-interacting RNA-binding protein, mitochondrial OS=Mus musculus OX=10090 GN=Slirp PE=1 SV=2	0	19.748	42	4	4	4	1	112	13.36	4	0	1.103	1.154	1.027	0.981	0.14	0.21	0.04	-0.03	0.0773693	0.607372	0.189014	0.790559	0.508411	0.97181	0.78632	0.986585	335091	369702	386722	379514	High	High	High	High	370
High	Master Protein	Q3TCH7	Cullin-4A OS=Mus musculus OX=10090 GN=Cul4a PE=1 SV=1	0	81.653	29	22	28	9	1	759	63.53	22	0	1.102	1.261	1.015	0.887	0.14	0.33	0.02	-0.17	0.107609	0.172393	0.154785	0.232659	0.607036	0.728973	0.72978	0.798963	247945	273126	312542	277293	High	High	High	High	371
High	Master Protein	P60603	Reactive oxygen species modulator 1 OS=Mus musculus OX=10090 GN=Romo1 PE=2 SV=1	0	9.81	13	2	5	2	1	79	10.87	2	0	1.102	1.025	0.952	1.023	0.14	0.04	-0.07	0.03	0.0969289	0.463765	0.0365661	0.850854	0.584185	0.931163	0.341739	0.995158	1.31186e+06	1.44508e+06	1.34515e+06	1.37608e+06	High	High	High	High	372
High	Master Protein	Q99KB8	Hydroxyacylglutathione hydrolase, mitochondrial OS=Mus musculus OX=10090 GN=Hagh PE=1 SV=2	0	28.32	26	8	9	8	1	309	25.58	8	0	1.102	1.005	1.098	1.204	0.14	0.01	0.13	0.27	0.0792026	0.419944	0.532049	0.160781	0.516709	0.918636	0.963215	0.708655	424444	467690	426377	513377	High	High	High	High	373
High	Master Protein	Q8CGF7	Transcription elongation regulator 1 OS=Mus musculus OX=10090 GN=Tcerg1 PE=1 SV=2	0	19.397	3	4	4	4	1	1100	7.92	4	0	1.102	1.122	1.259	1.236	0.14	0.17	0.33	0.31	0.157417	0.874802	0.54629	0.0991308	0.723286	0.995494	0.964415	0.578024	84217.3	92808.8	94483	116819	High	High	High	High	374
High	Master Protein	Q9D8Y0	EF-hand domain-containing protein D2 OS=Mus musculus OX=10090 GN=Efhd2 PE=1 SV=1	0	92.493	43	13	39	13	1	240	100.82	13	0	1.102	1.096	1.335	1.344	0.14	0.13	0.42	0.43	0.121451	0.919382	0.0840325	0.0199117	0.645666	0.995494	0.551478	0.233521	3.98076e+06	4.3885e+06	4.36137e+06	5.85967e+06	High	High	High	High	375
High	Master Protein	Q99LY9	NADH dehydrogenase [ubiquinone] iron-sulfur protein 5 OS=Mus musculus OX=10090 GN=Ndufs5 PE=1 SV=3	0	89.777	52	9	44	9	1	106	146.13	9	0	1.101	1.029	1.021	1.092	0.14	0.04	0.03	0.13	0.35565	0.871535	0.527069	0.830009	0.918483	0.995494	0.961903	0.992256	1.10768e+07	1.21992e+07	1.14011e+07	1.24545e+07	High	High	High	High	376
Medium	Master Protein	P15261	Interferon gamma receptor 1 OS=Mus musculus OX=10090 GN=Ifngr1 PE=1 SV=3	0.017	3.297	4	2	2	2	1	477	2.09	2	0	1.101	1.004	1.016	1.114	0.14	0.01	0.02	0.16	0.107566	0.384221	0.172959	0.421098	0.607036	0.906777	0.763166	0.920953	551205	606709	553431	616472	High	High	High	High	377
High	Master Protein	Q8BUV8	Protein GPR107 OS=Mus musculus OX=10090 GN=Gpr107 PE=1 SV=2	0	10.1	6	3	3	3	1	551	9.1	3	0	1.101	1.166	1.215	1.147	0.14	0.22	0.28	0.2	0.143594	0.560447	0.73385	0.306509	0.70104	0.959433	0.986902	0.870663	157479	173410	183665	210613	High	High	High	High	378
High	Master Protein	A2AF47	Dedicator of cytokinesis protein 11 OS=Mus musculus OX=10090 GN=Dock11 PE=1 SV=1	0	11.153	1	3	3	2	1	2073	7.26	3	1	1.1	1.334	1.198	0.988	0.14	0.42	0.26	-0.02	0.116395	0.058523	0.826941	0.824176	0.635636	0.427211	0.990777	0.990603	226883	249543	302609	299064	High	High	High	High	379
High	Master Protein	O88291	DBIRD complex subunit ZNF326 OS=Mus musculus OX=10090 GN=Znf326 PE=1 SV=1	0	21.469	9	4	6	4	1	580	18.27	4	0	1.1	1.029	1.211	1.294	0.14	0.04	0.28	0.37	0.108949	0.620108	0.757027	0.0375709	0.613404	0.97492	0.986902	0.343318	268131	294851	276006	357134	High	High	High	High	380
High	Master Protein	P23492	Purine nucleoside phosphorylase OS=Mus musculus OX=10090 GN=Pnp PE=1 SV=2	0	27.053	19	5	8	5	1	289	18.01	5	0	1.1	0.972	1.164	1.318	0.14	-0.04	0.22	0.4	0.109245	0.289295	0.921676	0.0192629	0.614475	0.860997	0.992004	0.228212	264997	291540	257492	339481	High	High	High	High	381
High	Master Protein	P52927	High mobility group protein HMGI-C OS=Mus musculus OX=10090 GN=Hmga2 PE=1 SV=1	0	57.352	49	6	15	6	1	108	52.07	6	0	1.099	1.114	0.892	0.881	0.14	0.16	-0.16	-0.18	0.0968944	0.802314	0.00826564	0.20396	0.584185	0.990901	0.117518	0.764455	1.16193e+06	1.27749e+06	1.29408e+06	1.1396e+06	High	High	High	High	382
High	Master Protein	Q80X50	Ubiquitin-associated protein 2-like OS=Mus musculus OX=10090 GN=Ubap2l PE=1 SV=1	0	9.265	2	2	2	2	1	1107	5.39	2	0	1.099	1.211	1.319	1.197	0.14	0.28	0.4	0.26	0.169001	0.529022	0.491222	0.185502	0.746185	0.95201	0.957561	0.741712	35670.8	39193	43201.7	51707.7	High	High	High	High	383
High	Master Protein	Q6IRU2	Tropomyosin alpha-4 chain OS=Mus musculus OX=10090 GN=Tpm4 PE=1 SV=3	0	56.705	51	19	29	12	1	248	38.77	19	0	1.099	0.968	1.077	1.223	0.14	-0.05	0.11	0.29	0.0887583	0.173136	0.467572	0.0728143	0.551515	0.728973	0.957326	0.504239	1.23773e+06	1.35986e+06	1.19779e+06	1.46439e+06	High	High	High	High	384
High	Master Protein	Q9CY16	28S ribosomal protein S28, mitochondrial OS=Mus musculus OX=10090 GN=Mrps28 PE=1 SV=1	0	18.232	27	5	8	5	1	186	10.36	5	0	1.098	1.193	1.051	0.968	0.14	0.25	0.07	-0.05	0.0995376	0.257057	0.339524	0.605512	0.593754	0.832441	0.911286	0.96579	874196	960176	1.04261e+06	1.00899e+06	High	High	High	High	385
High	Master Protein	Q9DC70	NADH dehydrogenase [ubiquinone] iron-sulfur protein 7, mitochondrial OS=Mus musculus OX=10090 GN=Ndufs7 PE=1 SV=1	0	82.295	35	8	54	8	1	224	142.76	8	0	1.098	1.125	1.036	1.011	0.13	0.17	0.05	0.02	0.372321	0.521386	0.614973	0.778982	0.922781	0.950385	0.975632	0.986585	2.04506e+07	2.24476e+07	2.30021e+07	2.32581e+07	High	High	High	High	386
High	Master Protein	Q08288	Cell growth-regulating nucleolar protein OS=Mus musculus OX=10090 GN=Lyar PE=1 SV=2	0	16.84	12	6	8	5	1	388	13.08	6	0	1.098	1.08	1.151	1.17	0.14	0.11	0.2	0.23	0.177519	0.832048	0.862592	0.184352	0.754982	0.991263	0.990777	0.740838	98690.6	108399	106622	124735	High	High	High	High	387
High	Master Protein	Q71RI9	Kynurenine--oxoglutarate transaminase 3 OS=Mus musculus OX=10090 GN=Kyat3 PE=1 SV=1	0	153.504	45	20	43	20	1	455	108.6	20	0	1.098	0.829	1.034	1.369	0.14	-0.27	0.05	0.45	0.263652	0.00764903	0.428602	0.0197763	0.854774	0.104018	0.948412	0.232872	5.81629e+06	6.38811e+06	4.82323e+06	6.60533e+06	High	High	High	High	388
High	Master Protein	P10605	Cathepsin B OS=Mus musculus OX=10090 GN=Ctsb PE=1 SV=2	0	145.518	42	14	57	14	1	339	180.41	14	0	1.098	0.853	1.143	1.473	0.14	-0.23	0.19	0.56	0.234407	0.0139676	0.833529	0.00435901	0.831526	0.162856	0.990777	0.077071	5.65786e+06	6.21321e+06	4.82431e+06	7.10445e+06	High	High	High	High	389
High	Master Protein	Q9DBL9	1-acylglycerol-3-phosphate O-acyltransferase ABHD5 OS=Mus musculus OX=10090 GN=Abhd5 PE=1 SV=1	0.008	4.524	9	2	2	2	1	351	2.85	2	0	1.097	1.155	0.938	0.892	0.13	0.21	-0.09	-0.17	0.188195	0.837546	0.0714608	0.492379	0.763279	0.991263	0.50701	0.951866	17418.6	19115.5	20114.6	17932.2	High	High	High	High	390
High	Master Protein	Q9WVM3	Anaphase-promoting complex subunit 7 OS=Mus musculus OX=10090 GN=Anapc7 PE=1 SV=3	0	10.544	6	3	3	3	1	565	6.11	3	0	1.097	1.342	1.147	0.938	0.13	0.42	0.2	-0.09	0.183298	0.0994314	0.752076	0.597967	0.761574	0.568152	0.986902	0.96579	54569	59853	73249.2	68678.7	High	High	High	High	391
High	Master Protein	Q99LC3	NADH dehydrogenase [ubiquinone] 1 alpha subcomplex subunit 10, mitochondrial OS=Mus musculus OX=10090 GN=Ndufa10 PE=1 SV=1	0	235.177	59	25	121	25	1	355	343.75	25	0	1.097	1.001	0.933	1.023	0.13	0	-0.1	0.03	0.374866	0.679493	0.155788	0.836361	0.923823	0.981182	0.730203	0.993296	2.8114e+07	3.08438e+07	2.81443e+07	2.87885e+07	High	High	High	High	392
High	Master Protein	Q9CR59	Growth arrest and DNA damage-inducible proteins-interacting protein 1 OS=Mus musculus OX=10090 GN=Gadd45gip1 PE=1 SV=1	0	24.798	20	6	9	6	1	222	20.34	6	0	1.097	0.961	1.126	1.285	0.13	-0.06	0.17	0.36	0.0992449	0.217219	0.768099	0.0610525	0.593217	0.78259	0.988083	0.466678	459262	503928	441534	567499	High	High	High	High	393
High	Master Protein	Q640M1	U3 small nucleolar RNA-associated protein 14 homolog A OS=Mus musculus OX=10090 GN=Utp14a PE=1 SV=1	0	36.471	12	8	11	8	1	767	24.7	8	0	1.096	1.245	1.141	1.005	0.13	0.32	0.19	0.01	0.113847	0.168977	0.87785	0.872854	0.628805	0.726613	0.990777	0.995594	556748	609962	693033	696205	High	High	High	High	394
High	Master Protein	Q9DCC8	Mitochondrial import receptor subunit TOM20 homolog OS=Mus musculus OX=10090 GN=Tomm20 PE=1 SV=1	0	23.131	36	5	13	5	1	145	24.62	5	0	1.096	1.014	0.975	1.053	0.13	0.02	-0.04	0.07	0.109871	0.383624	0.0661092	0.656991	0.614862	0.906777	0.485385	0.970324	1.38375e+06	1.51613e+06	1.40381e+06	1.47814e+06	High	High	High	High	395
High	Master Protein	P20152	Vimentin OS=Mus musculus OX=10090 GN=Vim PE=1 SV=3	0	251.684	60	34	120	28	1	466	301.23	34	3	1.096	0.993	1.243	1.372	0.13	-0.01	0.31	0.46	0.182884	0.377347	0.30268	0.0202617	0.761574	0.904431	0.891086	0.236197	5.07615e+06	5.56493e+06	5.03948e+06	6.91513e+06	High	High	High	High	396
High	Master Protein	Q99JY9	Actin-related protein 3 OS=Mus musculus OX=10090 GN=Actr3 PE=1 SV=3	0	258.302	63	25	121	25	1	418	390.7	25	0	1.095	1.045	1.078	1.13	0.13	0.06	0.11	0.18	0.385243	0.979701	0.878383	0.666714	0.924161	0.999773	0.990777	0.970324	1.53956e+07	1.68563e+07	1.60868e+07	1.81756e+07	High	High	High	High	397
High	Master Protein	P40142	Transketolase OS=Mus musculus OX=10090 GN=Tkt PE=1 SV=1	0	329.293	54	33	134	33	1	623	489.72	33	0	1.095	0.78	0.822	1.154	0.13	-0.36	-0.28	0.21	0.38605	0.00767588	0.0114254	0.57284	0.924738	0.104018	0.150616	0.96579	2.50161e+07	2.73852e+07	1.95246e+07	2.25231e+07	High	High	High	High	398
High	Master Protein	P28474	Alcohol dehydrogenase class-3 OS=Mus musculus OX=10090 GN=Adh5 PE=1 SV=3	0	69.606	40	12	24	10	1	374	60.67	12	0	1.095	0.902	1.117	1.357	0.13	-0.15	0.16	0.44	0.100699	0.0243639	0.730489	0.00366543	0.596707	0.242607	0.986902	0.0674741	1.77318e+06	1.94154e+06	1.59858e+06	2.16854e+06	High	High	High	High	399
High	Master Protein	Q91WD5	NADH dehydrogenase [ubiquinone] iron-sulfur protein 2, mitochondrial OS=Mus musculus OX=10090 GN=Ndufs2 PE=1 SV=1	0	337.765	72	29	247	29	1	463	686.45	29	0	1.093	1.016	1.017	1.094	0.13	0.02	0.02	0.13	0.393353	0.780425	0.502874	0.823911	0.928275	0.987748	0.957561	0.990603	5.02642e+07	5.49471e+07	5.10712e+07	5.5858e+07	High	High	High	High	400
High	Master Protein	Q9JIF0	Protein arginine N-methyltransferase 1 OS=Mus musculus OX=10090 GN=Prmt1 PE=1 SV=1	0	28.758	19	6	9	6	1	371	25.62	6	0	1.093	1.131	1.214	1.174	0.13	0.18	0.28	0.23	0.0929792	0.691931	0.737111	0.219176	0.569228	0.983544	0.986902	0.785551	302029	330253	341541	400985	High	High	High	High	401
High	Master Protein	Q80X82	Symplekin OS=Mus musculus OX=10090 GN=Sympk PE=1 SV=2	0	66.459	14	15	16	15	1	1288	39.59	15	0	1.093	1.177	1.312	1.219	0.13	0.23	0.39	0.29	0.131536	0.38618	0.170335	0.0866956	0.673192	0.907063	0.757262	0.550555	998275	1.09156e+06	1.17477e+06	1.43228e+06	High	High	High	High	402
High	Master Protein	Q9WUR9	Adenylate kinase 4, mitochondrial OS=Mus musculus OX=10090 GN=Ak4 PE=1 SV=1	0	38.497	35	8	20	8	1	223	55.31	8	0	1.092	1.142	1.032	0.987	0.13	0.19	0.04	-0.02	0.10281	0.630087	0.297447	0.911762	0.596748	0.97492	0.887903	0.997054	2.62251e+06	2.86486e+06	2.99401e+06	2.95557e+06	High	High	High	High	403
High	Master Protein	Q501J2	Adenine nucleotide translocase lysine N-methyltransferase OS=Mus musculus OX=10090 GN=Antkmt PE=1 SV=1	0	10.156	17	3	3	3	1	229	7.86	3	0	1.092	1.076	0.979	0.993	0.13	0.11	-0.03	-0.01	0.131296	0.919415	0.073874	0.853618	0.672793	0.995494	0.514309	0.995594	254972	278333	274253	272445	High	High	High	High	404
High	Master Protein	O35680	28S ribosomal protein S12, mitochondrial OS=Mus musculus OX=10090 GN=Mrps12 PE=1 SV=1	0	15.098	39	4	7	4	1	139	14.53	4	0	1.092	0.981	0.938	1.044	0.13	-0.03	-0.09	0.06	0.100756	0.343044	0.0258995	0.836313	0.596707	0.896637	0.26942	0.993296	346206	377933	339607	354584	High	High	High	High	405
High	Master Protein	Q9CQZ5	NADH dehydrogenase [ubiquinone] 1 alpha subcomplex subunit 6 OS=Mus musculus OX=10090 GN=Ndufa6 PE=1 SV=1	0	78.524	59	8	57	8	1	131	156.97	8	0	1.092	0.999	0.963	1.053	0.13	0	-0.06	0.07	0.398252	0.662588	0.250369	0.982429	0.931026	0.97492	0.858863	0.999848	2.28628e+07	2.49695e+07	2.28289e+07	2.40336e+07	High	High	High	High	406
High	Master Protein	Q99N95	39S ribosomal protein L3, mitochondrial OS=Mus musculus OX=10090 GN=Mrpl3 PE=1 SV=1	0	46.222	28	9	11	9	1	348	35.24	9	0	1.092	1.091	1.149	1.15	0.13	0.13	0.2	0.2	0.117985	0.998572	0.979803	0.181597	0.638324	0.999773	0.999773	0.736644	1.57915e+06	1.72464e+06	1.72271e+06	1.98164e+06	High	High	High	High	407
High	Master Protein	Q9JKP5	Muscleblind-like protein 1 OS=Mus musculus OX=10090 GN=Mbnl1 PE=1 SV=1	0	21.015	15	6	8	2	1	341	20.25	6	0	1.091	1.25	1.192	1.04	0.13	0.32	0.25	0.06	0.215304	0.290738	0.909418	0.685584	0.80528	0.861701	0.991669	0.970324	76759.8	83718.5	95930.3	99803.4	High	High	High	High	408
High	Master Protein	Q8BSE0	Regulator of microtubule dynamics protein 2 OS=Mus musculus OX=10090 GN=Rmdn2 PE=1 SV=1	0	42.097	29	12	17	12	1	410	39.23	12	0	1.091	0.926	1.048	1.235	0.13	-0.11	0.07	0.3	0.129391	0.0472552	0.280103	0.062499	0.665372	0.373031	0.873913	0.467577	1.45153e+06	1.58319e+06	1.34348e+06	1.65891e+06	High	High	High	High	409
High	Master Protein	Q9EPC1	Alpha-parvin OS=Mus musculus OX=10090 GN=Parva PE=1 SV=1	0	118.444	36	17	41	16	1	372	96.22	17	1	1.09	1.216	1.049	0.94	0.12	0.28	0.07	-0.09	0.102632	0.17731	0.417545	0.600052	0.596748	0.732527	0.941952	0.96579	3.03522e+06	3.30813e+06	3.69215e+06	3.4697e+06	High	High	High	High	410
High	Master Protein	Q01237	3-hydroxy-3-methylglutaryl-coenzyme A reductase OS=Mus musculus OX=10090 GN=Hmgcr PE=1 SV=3	0	19.496	7	5	6	5	1	887	12.68	5	0	1.09	1.224	1.073	0.956	0.12	0.29	0.1	-0.07	0.183151	0.333992	0.450876	0.713297	0.761574	0.896637	0.955524	0.970754	119819	130618	146680	140166	High	High	High	High	411
High	Master Protein	Q8R127	Saccharopine dehydrogenase-like oxidoreductase OS=Mus musculus OX=10090 GN=Sccpdh PE=1 SV=1	0	32.66	17	6	6	6	1	429	19.17	6	0	1.09	0.988	0.99	1.091	0.12	-0.02	-0.02	0.13	0.12439	0.341975	0.115737	0.556832	0.650588	0.896637	0.646504	0.965089	952506	1.03819e+06	941538	1.02734e+06	High	High	High	High	412
High	Master Protein	Q9DB20	ATP synthase subunit O, mitochondrial OS=Mus musculus OX=10090 GN=Atp5po PE=1 SV=1	0	235.753	73	18	142	18	1	213	377.56	18	0	1.09	0.998	1.039	1.134	0.12	0	0.06	0.18	0.410798	0.660329	0.631488	0.649716	0.93275	0.97492	0.981698	0.970324	1.25562e+08	1.36808e+08	1.25332e+08	1.42126e+08	High	High	High	High	413
High	Master Protein	Q9Z1X4	Interleukin enhancer-binding factor 3 OS=Mus musculus OX=10090 GN=Ilf3 PE=1 SV=2	0	75.426	18	16	25	13	1	898	62.77	16	3	1.09	1.151	1.266	1.199	0.12	0.2	0.34	0.26	0.116545	0.515277	0.279609	0.10684	0.635857	0.95004	0.873683	0.591811	1.22011e+06	1.33049e+06	1.40485e+06	1.68389e+06	High	High	High	High	414
High	Master Protein	P58771	Tropomyosin alpha-1 chain OS=Mus musculus OX=10090 GN=Tpm1 PE=1 SV=1	0	215.641	59	36	120	13	1	284	253.15	36	21	1.09	0.995	1.116	1.223	0.12	-0.01	0.16	0.29	0.409084	0.637179	0.883867	0.349333	0.932494	0.97492	0.990777	0.888764	1.24651e+07	1.35859e+07	1.23981e+07	1.51571e+07	High	High	High	High	415
High	Master Protein	Q9JMH6	Thioredoxin reductase 1, cytoplasmic OS=Mus musculus OX=10090 GN=Txnrd1 PE=1 SV=3	0	70.128	30	15	20	14	1	613	53.53	15	1	1.09	0.87	0.986	1.235	0.12	-0.2	-0.02	0.3	0.12414	0.0108657	0.102116	0.0547117	0.649862	0.137955	0.612932	0.436568	1.18267e+06	1.28921e+06	1.02882e+06	1.27058e+06	High	High	High	High	416
High	Master Protein	Q921I1	Serotransferrin OS=Mus musculus OX=10090 GN=Tf PE=1 SV=1	0	200.277	56	37	73	37	1	697	203.31	37	0	1.09	1.025	1.249	1.327	0.12	0.04	0.32	0.41	0.338686	0.734439	0.261113	0.124647	0.908549	0.98508	0.863956	0.63961	6.75643e+06	7.36142e+06	6.92809e+06	9.19622e+06	High	High	High	High	417
High	Master Protein	Q9D2C7	Bax inhibitor 1 OS=Mus musculus OX=10090 GN=Tmbim6 PE=1 SV=1	0	12.733	4	2	3	2	1	237	9.42	2	0	1.089	1.101	0.924	0.914	0.12	0.14	-0.11	-0.13	0.126286	0.925037	0.013885	0.376378	0.657218	0.995494	0.171703	0.906581	1.68289e+06	1.83196e+06	1.85221e+06	1.69275e+06	High	High	High	High	418
High	Master Protein	P35980	60S ribosomal protein L18 OS=Mus musculus OX=10090 GN=Rpl18 PE=1 SV=3	0	68.54	37	8	27	8	1	188	85.54	8	0	1.089	1.283	1.084	0.92	0.12	0.36	0.12	-0.12	0.103301	0.0469902	0.6484	0.487019	0.597811	0.373031	0.984069	0.949643	3.07358e+06	3.34819e+06	3.9423e+06	3.62793e+06	High	High	High	High	419
High	Master Protein	Q9DCZ4	MICOS complex subunit Mic26 OS=Mus musculus OX=10090 GN=Apoo PE=1 SV=2	0	63.922	40	7	39	7	1	198	123.58	7	0	1.089	1.031	1.004	1.061	0.12	0.04	0.01	0.09	0.373968	0.789136	0.346549	0.832724	0.922781	0.988596	0.911286	0.992873	7.08971e+06	7.72162e+06	7.30726e+06	7.75147e+06	High	High	High	High	420
High	Master Protein	O35405	5'-3' exonuclease PLD3 OS=Mus musculus OX=10090 GN=Pld3 PE=1 SV=1	0	24.87	13	5	9	5	1	488	25.03	5	0	1.089	1.025	1.228	1.304	0.12	0.04	0.3	0.38	0.115404	0.478951	0.474642	0.0121153	0.633002	0.938653	0.957561	0.167002	1.20757e+06	1.31471e+06	1.23806e+06	1.61423e+06	High	High	High	High	421
High	Master Protein	Q3TCJ1	BRISC complex subunit Abraxas 2 OS=Mus musculus OX=10090 GN=Abraxas2 PE=1 SV=1	0	14.178	11	4	6	4	1	415	14.44	4	0	1.089	0.951	1.204	1.379	0.12	-0.07	0.27	0.46	0.139199	0.161651	0.701558	0.01743	0.692074	0.716287	0.986902	0.212113	628016	684098	597081	823538	High	High	High	High	422
High	Master Protein	Q9JHW2	Omega-amidase NIT2 OS=Mus musculus OX=10090 GN=Nit2 PE=1 SV=1	0	22.501	22	5	5	5	1	276	9.44	5	0	1.089	1.003	1.45	1.574	0.12	0	0.54	0.65	0.199068	0.42677	0.0791108	0.000337989	0.777557	0.921315	0.534296	0.00973307	84050.5	91496.9	84309.3	132683	High	High	High	High	423
High	Master Protein	Q04447	Creatine kinase B-type OS=Mus musculus OX=10090 GN=Ckb PE=1 SV=1	0	308.407	61	19	182	17	1	381	673.89	19	1	1.089	0.706	1.076	1.659	0.12	-0.5	0.11	0.73	0.413438	0.000358427	0.863893	0.003832	0.934856	0.00820994	0.990777	0.0694415	2.34754e+07	2.55655e+07	1.65824e+07	2.75087e+07	High	High	High	High	424
High	Master Protein	Q9D8B1	Androgen-induced gene 1 protein OS=Mus musculus OX=10090 GN=Aig1 PE=2 SV=2	0.003	5.675	9	2	2	2	1	238	2.05	2	0	1.088	1.083	0.973	0.977	0.12	0.12	-0.04	-0.03	0.120936	0.920248	0.0585157	0.750134	0.645666	0.995494	0.455722	0.979205	466252	507291	505147	493604	High	High	High	High	425
High	Master Protein	Q9Z1P6	NADH dehydrogenase [ubiquinone] 1 alpha subcomplex subunit 7 OS=Mus musculus OX=10090 GN=Ndufa7 PE=1 SV=3	0	142.433	79	18	87	18	1	113	220.18	18	0	1.088	1.048	1.037	1.077	0.12	0.07	0.05	0.11	0.419685	0.997799	0.620658	0.901893	0.935565	0.999773	0.979676	0.995594	1.8712e+07	2.03545e+07	1.96011e+07	2.11088e+07	High	High	High	High	426
High	Master Protein	Q91YL7	PGAP2-interacting protein OS=Mus musculus OX=10090 GN=Cwh43 PE=1 SV=1	0	152.872	28	21	67	21	1	699	208.88	21	0	1.088	0.967	1.024	1.152	0.12	-0.05	0.03	0.2	0.416101	0.426329	0.46282	0.49964	0.935565	0.921315	0.957031	0.953034	7.51962e+06	8.18147e+06	7.27377e+06	8.38078e+06	High	High	High	High	427
High	Master Protein	Q91WC7	NIPA-like protein 2 OS=Mus musculus OX=10090 GN=Nipal2 PE=2 SV=1	0	12.417	13	4	4	4	1	383	9.39	4	0	1.088	1.119	1.183	1.15	0.12	0.16	0.24	0.2	0.102167	0.786357	0.946557	0.286652	0.596748	0.988107	0.996515	0.858746	291100	316668	325719	374617	High	High	High	High	428
High	Master Protein	Q62418	Drebrin-like protein OS=Mus musculus OX=10090 GN=Dbnl PE=1 SV=2	0	65.045	41	13	18	13	1	436	47.7	13	0	1.088	1.18	1.296	1.194	0.12	0.24	0.37	0.26	0.138004	0.393735	0.26055	0.185309	0.690733	0.909302	0.863956	0.741712	596446	648748	704017	840575	High	High	High	High	429
High	Master Protein	Q9DBR3	Armadillo repeat-containing protein 8 OS=Mus musculus OX=10090 GN=Armc8 PE=1 SV=2	0	14.314	5	3	4	3	1	673	11.4	3	0	1.087	1.227	1.048	0.928	0.12	0.29	0.07	-0.11	0.196095	0.351454	0.325034	0.570545	0.769744	0.89685	0.906945	0.96579	100296	109026	123019	114221	High	High	High	High	430
High	Master Protein	Q80U95	Ubiquitin-protein ligase E3C OS=Mus musculus OX=10090 GN=Ube3c PE=1 SV=2	0	25.595	8	8	8	8	1	1083	22.4	8	0	1.087	1.23	1.166	1.03	0.12	0.3	0.22	0.04	0.154674	0.235496	0.960629	0.896885	0.721029	0.809761	0.996709	0.995594	219400	238385	269967	278008	High	High	High	High	431
High	Master Protein	Q9Z2B9	Ribosomal protein S6 kinase alpha-4 OS=Mus musculus OX=10090 GN=Rps6ka4 PE=1 SV=2	0	13.37	5	4	4	4	1	773	11.8	4	0	1.086	1.531	1.202	0.853	0.12	0.61	0.27	-0.23	0.140969	0.00160547	0.825059	0.129876	0.695397	0.0288291	0.990777	0.650725	262622	285247	401997	342974	High	High	High	High	432
High	Master Protein	O88343	Electrogenic sodium bicarbonate cotransporter 1 OS=Mus musculus OX=10090 GN=Slc4a4 PE=1 SV=2	0	31.781	9	6	8	6	1	1079	24.87	6	0	1.086	1.145	1.038	0.985	0.12	0.19	0.05	-0.02	0.148164	0.517353	0.27357	0.763291	0.707844	0.95004	0.868015	0.983332	763481	829092	873864	860857	High	High	High	High	433
High	Master Protein	Q91VR2	ATP synthase subunit gamma, mitochondrial OS=Mus musculus OX=10090 GN=Atp5f1c PE=1 SV=1	0	192.818	58	18	162	17	1	298	412.85	18	0	1.086	1.006	1.017	1.099	0.12	0.01	0.02	0.14	0.426293	0.712384	0.506198	0.802176	0.937159	0.98508	0.957561	0.986585	9.31387e+07	1.01191e+08	9.36987e+07	1.0293e+08	High	High	High	High	434
High	Master Protein	P03921	NADH-ubiquinone oxidoreductase chain 5 OS=Mus musculus OX=10090 GN=Mtnd5 PE=1 SV=3	0	81.787	15	8	26	8	1	607	62.32	8	0	1.086	0.973	0.994	1.109	0.12	-0.04	-0.01	0.15	0.408588	0.452949	0.302495	0.609742	0.932494	0.930214	0.891086	0.96579	7.28332e+06	7.90784e+06	7.08845e+06	7.85771e+06	High	High	High	High	435
High	Master Protein	Q99LB2	Dehydrogenase/reductase SDR family member 4 OS=Mus musculus OX=10090 GN=Dhrs4 PE=1 SV=3	0	89.012	49	13	22	13	1	279	74.2	13	0	1.086	0.957	1.022	1.16	0.12	-0.06	0.03	0.21	0.168216	0.126015	0.307103	0.194786	0.745853	0.636418	0.894895	0.754487	4.06257e+06	4.41269e+06	3.88674e+06	4.50836e+06	High	High	High	High	436
High	Master Protein	O88532	Zinc finger RNA-binding protein OS=Mus musculus OX=10090 GN=Zfr PE=1 SV=2	0	26.053	7	5	5	5	1	1074	17.29	5	0	1.086	1.112	1.313	1.282	0.12	0.15	0.39	0.36	0.187037	0.87278	0.293012	0.0502446	0.762761	0.995494	0.885895	0.413399	149072	161962	165841	212660	High	High	High	High	437
High	Master Protein	O35566	CD151 antigen OS=Mus musculus OX=10090 GN=Cd151 PE=1 SV=2	0	13.837	13	4	9	4	1	253	23.42	4	0	1.085	1.14	1.033	0.984	0.12	0.19	0.05	-0.02	0.147159	0.611014	0.20953	0.858714	0.706754	0.973406	0.823812	0.995594	1.57023e+06	1.7043e+06	1.78934e+06	1.75988e+06	High	High	High	High	438
High	Master Protein	Q60930	Voltage-dependent anion-selective channel protein 2 OS=Mus musculus OX=10090 GN=Vdac2 PE=1 SV=2	0	240.963	66	17	113	17	1	295	472.15	17	0	1.085	1.02	0.981	1.044	0.12	0.03	-0.03	0.06	0.434467	0.805426	0.326715	0.939177	0.939353	0.990901	0.909322	0.998852	9.55572e+07	1.03665e+08	9.74399e+07	1.01717e+08	High	High	High	High	439
High	Master Protein	Q99J99	3-mercaptopyruvate sulfurtransferase OS=Mus musculus OX=10090 GN=Mpst PE=1 SV=4	0	71.074	41	10	31	10	1	297	100.42	10	0	1.085	0.902	0.871	1.047	0.12	-0.15	-0.2	0.07	0.122693	0.0298134	0.00309942	0.691852	0.647818	0.274888	0.0515026	0.970324	2.61455e+06	2.83734e+06	2.35913e+06	2.47024e+06	High	High	High	High	440
High	Master Protein	Q9JKJ9	24-hydroxycholesterol 7-alpha-hydroxylase OS=Mus musculus OX=10090 GN=Cyp39a1 PE=1 SV=1	0	9.636	5	2	3	2	1	470	3.82	2	0	1.085	1.27	1.27	1.085	0.12	0.34	0.35	0.12	0.172002	0.147923	0.43651	0.551422	0.748696	0.687364	0.951745	0.965089	176058	191005	223597	242631	High	High	High	High	441
High	Master Protein	Q921H8	3-ketoacyl-CoA thiolase A, peroxisomal OS=Mus musculus OX=10090 GN=Acaa1a PE=1 SV=1	0	362.848	66	22	116	9	1	424	408.42	22	15	1.085	1.064	1.121	1.142	0.12	0.09	0.16	0.19	0.433485	0.886717	0.853655	0.616785	0.939353	0.995494	0.990777	0.96579	1.45133e+07	1.57475e+07	1.54488e+07	1.76457e+07	High	High	High	High	442
High	Master Protein	P06801	NADP-dependent malic enzyme OS=Mus musculus OX=10090 GN=Me1 PE=1 SV=2	0	188.501	51	24	53	24	1	572	159.13	24	0	1.085	0.79	0.837	1.149	0.12	-0.34	-0.26	0.2	0.127519	5.50442e-05	0.0016391	0.238686	0.661595	0.00154709	0.0326417	0.808586	3.45463e+06	3.74721e+06	2.72973e+06	3.13564e+06	High	High	High	High	443
High	Master Protein	Q3TC72	Fumarylacetoacetate hydrolase domain-containing protein 2A OS=Mus musculus OX=10090 GN=Fahd2 PE=1 SV=1	0	52.686	37	7	10	7	1	313	34.87	7	0	1.085	1.01	1.095	1.176	0.12	0.01	0.13	0.23	0.139827	0.516438	0.474448	0.184675	0.692074	0.95004	0.957561	0.740867	273855	297005	276627	325178	High	High	High	High	444
High	Master Protein	Q9CY57	Chromatin target of PRMT1 protein OS=Mus musculus OX=10090 GN=Chtop PE=1 SV=2	0	33.65	18	4	9	4	1	249	22.2	4	0	1.085	1.038	1.284	1.342	0.12	0.05	0.36	0.42	0.126336	0.621868	0.273914	0.0208877	0.657218	0.97492	0.868015	0.240126	462666	502205	480335	644812	High	High	High	High	445
High	Master Protein	Q91VY9	Cytoplasmic 60S subunit biogenesis factor ZNF622 OS=Mus musculus OX=10090 GN=Znf622 PE=1 SV=1	0.001	8.177	5	2	2	2	1	476	3.22	2	0	1.084	1.234	1.13	0.992	0.12	0.3	0.18	-0.01	0.228898	0.472398	0.551631	0.961624	0.828074	0.935608	0.964415	0.999848	26904.2	29158.1	33210.3	32957.3	High	High	High	High	446
High	Master Protein	Q9Z0T9	Integrin beta-6 OS=Mus musculus OX=10090 GN=Itgb6 PE=1 SV=1	0	37.584	14	10	11	10	1	787	28.53	10	0	1.084	1.125	1.052	1.014	0.12	0.17	0.07	0.02	0.117852	0.806755	0.297166	0.996754	0.638198	0.991263	0.887903	0.999848	502736	545028	565657	573300	High	High	High	High	447
High	Master Protein	Q8C460	ERI1 exoribonuclease 3 OS=Mus musculus OX=10090 GN=Eri3 PE=1 SV=1	0.007	4.628	6	2	2	2	1	337	3.12	2	0	1.084	1.174	1.096	1.011	0.12	0.23	0.13	0.02	0.23187	0.605269	0.537731	0.924787	0.831224	0.97181	0.964415	0.997966	75509.7	81847.1	88657.9	89666.7	High	High	High	High	448
High	Master Protein	P23198	Chromobox protein homolog 3 OS=Mus musculus OX=10090 GN=Cbx3 PE=1 SV=2	0	63.023	40	7	16	6	1	183	50.09	7	3	1.084	1.209	1.173	1.051	0.12	0.27	0.23	0.07	0.146303	0.21346	0.819079	0.590953	0.706724	0.782061	0.990777	0.96579	1.3252e+06	1.43609e+06	1.6025e+06	1.68494e+06	High	High	High	High	449
High	Master Protein	P56382	ATP synthase subunit epsilon, mitochondrial OS=Mus musculus OX=10090 GN=Atp5f1e PE=1 SV=2	0	21	58	4	27	4	1	52	56	4	0	1.084	1.008	1.053	1.132	0.12	0.01	0.07	0.18	0.439826	0.727756	0.718748	0.657942	0.942339	0.98508	0.986902	0.970324	3.72803e+07	4.04046e+07	3.75897e+07	4.25507e+07	High	High	High	High	450
High	Master Protein	Q99NB1	Acetyl-coenzyme A synthetase 2-like, mitochondrial OS=Mus musculus OX=10090 GN=Acss1 PE=1 SV=1	0	190.978	52	27	74	27	1	682	202.21	27	0	1.084	1.018	1.068	1.137	0.12	0.03	0.09	0.19	0.356136	0.634648	0.674221	0.441837	0.918483	0.97492	0.986902	0.930052	6.33071e+06	6.86155e+06	6.44186e+06	7.32558e+06	High	High	High	High	451
High	Master Protein	Q8BMF4	Dihydrolipoyllysine-residue acetyltransferase component of pyruvate dehydrogenase complex, mitochondrial OS=Mus musculus OX=10090 GN=Dlat PE=1 SV=2	0	346.213	41	24	129	24	1	642	434.02	24	0	1.084	1.058	1.115	1.142	0.12	0.08	0.16	0.19	0.440137	0.932857	0.890863	0.617457	0.942339	0.995494	0.991522	0.96579	2.73909e+07	2.96847e+07	2.89696e+07	3.30844e+07	High	High	High	High	452
High	Master Protein	P63005	Platelet-activating factor acetylhydrolase IB subunit beta OS=Mus musculus OX=10090 GN=Pafah1b1 PE=1 SV=2	0	69.19	36	12	19	11	1	410	45.74	12	0	1.084	0.821	0.915	1.208	0.12	-0.28	-0.13	0.27	0.139712	0.00488623	0.0196375	0.15542	0.692074	0.0728925	0.220024	0.698877	811188	878928	665919	804213	High	High	High	High	453
High	Master Protein	P47738	Aldehyde dehydrogenase, mitochondrial OS=Mus musculus OX=10090 GN=Aldh2 PE=1 SV=1	0	369.657	56	31	176	27	1	519	581.87	31	2	1.084	0.883	1.116	1.37	0.12	-0.18	0.16	0.45	0.437672	0.121291	0.882756	0.0956419	0.940688	0.62502	0.990777	0.57072	2.95767e+07	3.20678e+07	2.61153e+07	3.57822e+07	High	High	High	High	454
High	Master Protein	P10922	Histone H1.0 OS=Mus musculus OX=10090 GN=H1-0 PE=2 SV=4	0	74.006	33	10	55	10	1	194	170.3	10	0	1.083	1.034	0.818	0.856	0.12	0.05	-0.29	-0.22	0.443774	0.907346	0.00984292	0.177749	0.943405	0.995494	0.135632	0.731751	3.13793e+07	3.3985e+07	3.24602e+07	2.77864e+07	High	High	High	High	455
High	Master Protein	Q60932	Voltage-dependent anion-selective channel protein 1 OS=Mus musculus OX=10090 GN=Vdac1 PE=1 SV=3	0	301.762	79	21	151	20	1	296	602.95	21	1	1.083	0.987	0.968	1.062	0.11	-0.02	-0.05	0.09	0.444896	0.585549	0.269524	0.973461	0.943405	0.967694	0.867057	0.999848	9.83446e+07	1.0649e+08	9.70237e+07	1.03029e+08	High	High	High	High	456
High	Master Protein	O88329	Unconventional myosin-Ia OS=Mus musculus OX=10090 GN=Myo1a PE=2 SV=2	0	344.38	56	59	114	52	1	1043	333.15	59	6	1.083	1.013	0.995	1.064	0.11	0.02	-0.01	0.09	0.444712	0.756762	0.388865	0.965091	0.943405	0.986474	0.925937	0.999848	1.39639e+07	1.5121e+07	1.41396e+07	1.50394e+07	High	High	High	High	457
High	Master Protein	O54931	A-kinase anchor protein 2 OS=Mus musculus OX=10090 GN=Akap2 PE=1 SV=3	0	44.983	13	11	13	11	1	893	28.57	11	0	1.083	1.025	1.059	1.119	0.11	0.04	0.08	0.16	0.163128	0.558444	0.383618	0.414739	0.738223	0.959433	0.920315	0.920105	750052	812170	768534	860348	High	High	High	High	458
High	Master Protein	Q9D0G0	28S ribosomal protein S30, mitochondrial OS=Mus musculus OX=10090 GN=Mrps30 PE=1 SV=1	0	83.114	42	14	24	14	1	442	59.08	14	0	1.083	1.042	1.077	1.12	0.12	0.06	0.11	0.16	0.156225	0.708396	0.481104	0.360538	0.723286	0.98508	0.957561	0.893908	933920	1.01151e+06	973080	1.08959e+06	High	High	High	High	459
High	Master Protein	Q8CFJ7	Solute carrier family 25 member 45 OS=Mus musculus OX=10090 GN=Slc25a45 PE=1 SV=1	0	23.897	23	6	9	6	1	288	20.63	6	0	1.083	0.927	0.975	1.139	0.11	-0.11	-0.04	0.19	0.153152	0.0858029	0.0843348	0.279749	0.718505	0.526584	0.551478	0.852279	1.03972e+06	1.12552e+06	963648	1.0975e+06	High	High	High	High	460
High	Master Protein	Q9CPU4	Microsomal glutathione S-transferase 3 OS=Mus musculus OX=10090 GN=Mgst3 PE=1 SV=1	0	163.005	50	6	86	6	1	153	347.4	6	0	1.083	0.995	1.051	1.143	0.11	-0.01	0.07	0.19	0.445147	0.641029	0.705162	0.612152	0.943405	0.97492	0.986902	0.96579	2.2725e+07	2.46061e+07	2.26165e+07	2.58593e+07	High	High	High	High	461
High	Master Protein	Q8BGH2	Sorting and assembly machinery component 50 homolog OS=Mus musculus OX=10090 GN=Samm50 PE=1 SV=1	0	236.217	64	27	107	27	1	469	337.53	27	0	1.082	1.034	0.99	1.036	0.11	0.05	-0.01	0.05	0.449209	0.904687	0.365954	0.899081	0.945225	0.995494	0.91735	0.995594	2.08062e+07	2.25122e+07	2.1515e+07	2.22829e+07	High	High	High	High	462
High	Master Protein	Q6PB66	Leucine-rich PPR motif-containing protein, mitochondrial OS=Mus musculus OX=10090 GN=Lrpprc PE=1 SV=2	0	719.13	63	88	295	88	1	1392	866.24	88	0	1.082	1.081	1.048	1.049	0.11	0.11	0.07	0.07	0.451184	0.776831	0.689172	0.962977	0.946262	0.987205	0.986902	0.999848	3.32096e+07	3.592e+07	3.59053e+07	3.76565e+07	High	High	High	High	463
High	Master Protein	Q91VD9	NADH-ubiquinone oxidoreductase 75 kDa subunit, mitochondrial OS=Mus musculus OX=10090 GN=Ndufs1 PE=1 SV=2	0	650.735	68	48	366	48	1	727	1245.38	48	0	1.082	0.981	0.984	1.085	0.11	-0.03	-0.02	0.12	0.451088	0.551103	0.340381	0.863217	0.946262	0.958738	0.911286	0.995594	8.60098e+07	9.30313e+07	8.43795e+07	9.15675e+07	High	High	High	High	464
High	Master Protein	P08556	GTPase NRas OS=Mus musculus OX=10090 GN=Nras PE=1 SV=1	0	69.02	57	8	20	3	1	189	67.29	8	2	1.082	1.076	1.086	1.091	0.11	0.11	0.12	0.13	0.161765	0.954649	0.523617	0.560472	0.73617	0.998445	0.960627	0.96579	662604	716674	713268	778457	High	High	High	High	465
High	Master Protein	Q8BFQ4	WD repeat-containing protein 82 OS=Mus musculus OX=10090 GN=Wdr82 PE=1 SV=1	0.002	7.059	10	4	6	4	1	313	10.81	4	0	1.082	1.107	1.127	1.101	0.11	0.15	0.17	0.14	0.153989	0.827553	0.777502	0.509116	0.719934	0.991263	0.990777	0.954916	701258	758845	776616	855318	High	High	High	High	466
High	Master Protein	Q9JIX8	Apoptotic chromatin condensation inducer in the nucleus OS=Mus musculus OX=10090 GN=Acin1 PE=1 SV=3	0	150.202	24	28	42	28	1	1338	115.27	28	0	1.082	1.084	1.147	1.145	0.11	0.12	0.2	0.19	0.176048	0.965058	0.852731	0.27969	0.754982	0.999773	0.990777	0.852279	4.4602e+06	4.82532e+06	4.83693e+06	5.53617e+06	High	High	High	High	467
High	Master Protein	Q9CPT4	Myeloid-derived growth factor OS=Mus musculus OX=10090 GN=Mydgf PE=1 SV=1	0	25.499	25	4	11	4	1	166	32.87	4	0	1.082	0.995	1.14	1.24	0.11	-0.01	0.19	0.31	0.160466	0.362424	0.90736	0.05155	0.732552	0.901325	0.991669	0.419394	967683	1.04697e+06	962402	1.19382e+06	High	High	High	High	468
High	Master Protein	O70435	Proteasome subunit alpha type-3 OS=Mus musculus OX=10090 GN=Psma3 PE=1 SV=3	0	56.374	41	12	21	12	1	255	46.39	12	0	1.082	1.047	1.216	1.256	0.11	0.07	0.28	0.33	0.121401	0.628601	0.543489	0.0518903	0.645666	0.97492	0.964415	0.420985	2.3709e+06	2.5646e+06	2.48181e+06	3.11742e+06	High	High	High	High	469
High	Master Protein	P62320	Small nuclear ribonucleoprotein Sm D3 OS=Mus musculus OX=10090 GN=Snrpd3 PE=1 SV=1	0	38.536	32	3	12	3	1	126	47	3	0	1.082	1.136	1.356	1.293	0.11	0.18	0.44	0.37	0.103818	0.654621	0.130208	0.035933	0.59961	0.97492	0.677394	0.334917	315661	341700	358493	463510	High	High	High	High	470
High	Master Protein	P05201	Aspartate aminotransferase, cytoplasmic OS=Mus musculus OX=10090 GN=Got1 PE=1 SV=3	0	108.722	47	20	45	20	1	413	129.97	20	0	1.082	0.985	1.298	1.427	0.11	-0.02	0.38	0.51	0.19799	0.311358	0.141797	0.00820952	0.774385	0.876061	0.704807	0.127998	4.71531e+06	5.10129e+06	4.6431e+06	6.62395e+06	High	High	High	High	471
High	Master Protein	Q921G6	Leucine-rich repeat and calponin homology domain-containing protein 4 OS=Mus musculus OX=10090 GN=Lrch4 PE=1 SV=1	0	12.628	7	3	3	3	1	680	3.85	3	0	1.082	1.18	1.62	1.485	0.11	0.24	0.7	0.57	0.213926	0.735492	0.0319542	0.0041483	0.804261	0.98508	0.310206	0.0740204	17734	19184.4	20931.8	31080.7	High	High	High	High	472
High	Master Protein	Q3U821	WD repeat-containing protein 75 OS=Mus musculus OX=10090 GN=Wdr75 PE=1 SV=1	0	41.536	12	8	10	8	1	830	19.51	8	0	1.081	1.401	1.026	0.791	0.11	0.49	0.04	-0.34	0.122894	0.0177531	0.175639	0.0280024	0.647818	0.192701	0.767193	0.289325	305960	330690	428709	339284	High	High	High	High	473
High	Master Protein	Q8C3X8	Lipase maturation factor 2 OS=Mus musculus OX=10090 GN=Lmf2 PE=1 SV=1	0	22.769	9	4	4	4	1	702	14.6	4	0	1.081	1.184	1.076	0.982	0.11	0.24	0.11	-0.03	0.214701	0.470353	0.472675	0.856681	0.80528	0.933634	0.957561	0.995594	139251	150542	164879	161939	High	High	High	High	474
High	Master Protein	Q9ER88	28S ribosomal protein S29, mitochondrial OS=Mus musculus OX=10090 GN=Dap3 PE=1 SV=1	0	92.243	45	15	30	15	1	391	85.48	15	0	1.081	1.062	1.021	1.039	0.11	0.09	0.03	0.06	0.155647	0.74576	0.169162	0.72231	0.722459	0.98508	0.756675	0.974868	1.65697e+06	1.79169e+06	1.76052e+06	1.82951e+06	High	High	High	High	475
High	Master Protein	P40237	CD82 antigen OS=Mus musculus OX=10090 GN=Cd82 PE=1 SV=1	0	31.843	16	4	13	4	1	266	37.64	4	0	1.081	1.067	1.112	1.127	0.11	0.09	0.15	0.17	0.157441	0.817953	0.695715	0.305452	0.723286	0.991263	0.986902	0.870663	1.35772e+06	1.46753e+06	1.44809e+06	1.63157e+06	High	High	High	High	476
High	Master Protein	P24527	Leukotriene A-4 hydrolase OS=Mus musculus OX=10090 GN=Lta4h PE=1 SV=4	0	122.462	44	22	37	22	1	611	107.09	22	0	1.081	0.866	0.924	1.153	0.11	-0.21	-0.11	0.21	0.135394	0.00560133	0.0319252	0.232671	0.681775	0.0810659	0.310206	0.798963	2.81253e+06	3.03933e+06	2.43571e+06	2.80788e+06	High	High	High	High	477
High	Master Protein	P27773	Protein disulfide-isomerase A3 OS=Mus musculus OX=10090 GN=Pdia3 PE=1 SV=2	0	412.453	66	41	210	41	1	505	678.75	41	0	1.081	1.095	1.259	1.243	0.11	0.13	0.33	0.31	0.456449	0.691367	0.227525	0.29811	0.950422	0.983544	0.845195	0.866188	4.01664e+07	4.34044e+07	4.39751e+07	5.4646e+07	High	High	High	High	478
High	Master Protein	Q60759	Glutaryl-CoA dehydrogenase, mitochondrial OS=Mus musculus OX=10090 GN=Gcdh PE=1 SV=2	0	96.552	36	12	28	11	1	438	95.32	12	0	1.081	0.998	1.178	1.276	0.11	0	0.24	0.35	0.124038	0.281519	0.796717	0.0269207	0.649862	0.855246	0.990777	0.283753	1.87765e+06	2.02911e+06	1.87461e+06	2.3913e+06	High	High	High	High	479
High	Master Protein	Q8R3Q6	Protein MIX23 OS=Mus musculus OX=10090 GN=Mix23 PE=1 SV=1	0	27.158	31	4	6	4	1	144	13.45	4	0	1.081	1.014	1.208	1.288	0.11	0.02	0.27	0.37	0.163231	0.440961	0.684707	0.0676877	0.738223	0.926837	0.986902	0.487905	596362	644788	604635	778754	High	High	High	High	480
High	Master Protein	Q3UL36	Arginine and glutamate-rich protein 1 OS=Mus musculus OX=10090 GN=Arglu1 PE=1 SV=2	0	25.273	26	9	13	9	1	271	23.01	9	0	1.081	0.944	1.302	1.492	0.11	-0.08	0.38	0.58	0.154436	0.150519	0.24049	0.00031658	0.720877	0.689986	0.855047	0.00925399	783509	846959	739263	1.10294e+06	High	High	High	High	481
High	Master Protein	P30275	Creatine kinase U-type, mitochondrial OS=Mus musculus OX=10090 GN=Ckmt1 PE=1 SV=1	0	370.55	64	27	322	25	1	418	1224.07	27	1	1.081	0.863	1.251	1.567	0.11	-0.21	0.32	0.65	0.456628	0.0785294	0.249093	0.0114939	0.950422	0.506523	0.858863	0.161199	1.10311e+08	1.192e+08	9.51678e+07	1.49148e+08	High	High	High	High	482
High	Master Protein	P02301	Histone H3.3C OS=Mus musculus OX=10090 GN=H3-5 PE=3 SV=3	0	54.613	60	9	65	3	1	136	154.35	9	6	1.08	1.254	0.839	0.723	0.11	0.33	-0.25	-0.47	0.461696	0.104009	0.0187904	0.0150077	0.950422	0.585034	0.212995	0.191447	4.54644e+08	4.90845e+08	5.70134e+08	4.12053e+08	High	High	High	High	483
High	Master Protein	Q8BHF7	CDP-diacylglycerol--glycerol-3-phosphate 3-phosphatidyltransferase, mitochondrial OS=Mus musculus OX=10090 GN=Pgs1 PE=1 SV=1	0	12.273	6	3	3	3	1	553	8.33	3	0	1.08	1.189	1.056	0.959	0.11	0.25	0.08	-0.06	0.190135	0.415677	0.323353	0.649656	0.76486	0.918636	0.906945	0.970324	168411	181966	200262	192109	High	High	High	High	484
High	Master Protein	Q9CQ85	Mitochondrial import inner membrane translocase subunit Tim22 OS=Mus musculus OX=10090 GN=Timm22 PE=1 SV=1	0.002	7.686	26	3	4	3	1	194	5.75	3	0	1.08	1.075	1.058	1.063	0.11	0.1	0.08	0.09	0.132362	0.907379	0.29498	0.717423	0.674182	0.995494	0.887903	0.972106	381139	411638	409783	435510	High	High	High	High	485
High	Master Protein	P70404	Isocitrate dehydrogenase [NAD] subunit gamma 1, mitochondrial OS=Mus musculus OX=10090 GN=Idh3g PE=1 SV=1	0	224.507	52	16	91	16	1	393	273.26	16	0	1.08	0.977	1.016	1.122	0.11	-0.03	0.02	0.17	0.460986	0.528971	0.499833	0.697779	0.950422	0.95201	0.957561	0.970324	1.447e+07	1.56241e+07	1.41433e+07	1.58745e+07	High	High	High	High	486
High	Master Protein	P00848	ATP synthase subunit a OS=Mus musculus OX=10090 GN=Mtatp6 PE=1 SV=1	0	14.011	8	2	17	2	1	226	26.6	2	0	1.08	1.135	1.21	1.151	0.11	0.18	0.27	0.2	0.132228	0.651104	0.499572	0.214038	0.674182	0.97492	0.957561	0.780436	2.91798e+06	3.15071e+06	3.31213e+06	3.81091e+06	High	High	High	High	487
High	Master Protein	Q91YP2	Neurolysin, mitochondrial OS=Mus musculus OX=10090 GN=Nln PE=1 SV=1	0	66.333	23	15	19	15	1	704	50.21	15	0	1.08	0.983	1.101	1.21	0.11	-0.02	0.14	0.27	0.147358	0.20217	0.629989	0.0939463	0.707061	0.765009	0.981698	0.566883	2.05317e+06	2.21687e+06	2.018e+06	2.44148e+06	High	High	High	High	488
High	Master Protein	Q9ER41	Torsin-1B OS=Mus musculus OX=10090 GN=Tor1b PE=1 SV=2	0	20.711	17	5	8	5	1	336	14.73	5	0	1.079	1.316	1.07	0.877	0.11	0.4	0.1	-0.19	0.243071	0.137249	0.375786	0.315477	0.842749	0.665232	0.91735	0.876376	71668.9	77311.6	94296.2	82743.1	High	High	High	High	489
High	Master Protein	P13864	DNA (cytosine-5)-methyltransferase 1 OS=Mus musculus OX=10090 GN=Dnmt1 PE=1 SV=5	0	48.923	10	13	13	13	1	1620	30.56	13	0	1.079	1.142	0.99	0.936	0.11	0.19	-0.01	-0.1	0.166074	0.63663	0.114314	0.484478	0.742416	0.97492	0.642258	0.948573	582265	628456	664915	622068	High	High	High	High	490
High	Master Protein	P53798	Squalene synthase OS=Mus musculus OX=10090 GN=Fdft1 PE=1 SV=2	0	48.663	20	8	13	8	1	416	44.17	8	0	1.079	1.131	1.006	0.96	0.11	0.18	0.01	-0.06	0.173119	0.662292	0.161096	0.607489	0.749276	0.97492	0.738782	0.96579	659666	711738	746339	716253	High	High	High	High	491
High	Master Protein	Q9QZB9	Dynactin subunit 5 OS=Mus musculus OX=10090 GN=Dctn5 PE=1 SV=1	0	13.413	18	3	6	3	1	182	15.2	3	0	1.079	1.069	1.015	1.025	0.11	0.1	0.02	0.04	0.153547	0.820913	0.18081	0.902074	0.719606	0.991263	0.775114	0.995594	1.11278e+06	1.20114e+06	1.19004e+06	1.21939e+06	High	High	High	High	492
High	Master Protein	Q9QXK7	Cleavage and polyadenylation specificity factor subunit 3 OS=Mus musculus OX=10090 GN=Cpsf3 PE=1 SV=2	0	30.634	15	10	11	10	1	684	26.28	10	0	1.079	1.135	1.12	1.065	0.11	0.18	0.16	0.09	0.156364	0.652471	0.770539	0.549611	0.723286	0.97492	0.989551	0.965089	1.17171e+06	1.2646e+06	1.32966e+06	1.41628e+06	High	High	High	High	493
High	Master Protein	Q9DC29	ATP-binding cassette sub-family B member 6 OS=Mus musculus OX=10090 GN=Abcb6 PE=1 SV=1	0	35.23	10	7	7	6	1	842	21.11	7	0	1.079	1.003	1.002	1.077	0.11	0	0	0.11	0.158136	0.388759	0.129656	0.621125	0.725903	0.908438	0.677394	0.96579	537543	579890	539256	580983	High	High	High	High	494
High	Master Protein	Q91V61	Sideroflexin-3 OS=Mus musculus OX=10090 GN=Sfxn3 PE=1 SV=1	0	178.196	61	15	98	13	1	321	332.26	15	3	1.079	0.952	0.983	1.114	0.11	-0.07	-0.02	0.16	0.466249	0.385746	0.334644	0.734607	0.950422	0.906777	0.911286	0.976869	1.29886e+07	1.40117e+07	1.23661e+07	1.37733e+07	High	High	High	High	495
High	Master Protein	Q9CQJ8	NADH dehydrogenase [ubiquinone] 1 beta subcomplex subunit 9 OS=Mus musculus OX=10090 GN=Ndufb9 PE=1 SV=3	0	122.141	72	13	71	13	1	179	264.38	13	0	1.079	0.942	0.98	1.121	0.11	-0.09	-0.03	0.17	0.465838	0.330284	0.320113	0.682425	0.950422	0.89616	0.905342	0.970324	9.27114e+06	1.00021e+07	8.73775e+06	9.79909e+06	High	High	High	High	496
High	Master Protein	Q91WM1	Spermatid perinuclear RNA-binding protein OS=Mus musculus OX=10090 GN=Strbp PE=1 SV=1	0	19.922	9	6	8	3	1	672	16.55	6	0	1.079	1.089	1.211	1.2	0.11	0.12	0.28	0.26	0.191916	0.990525	0.724248	0.137502	0.766702	0.999773	0.986902	0.669329	184965	199629	201418	241717	High	High	High	High	497
High	Master Protein	Q91Z53	Glyoxylate reductase/hydroxypyruvate reductase OS=Mus musculus OX=10090 GN=Grhpr PE=1 SV=1	0	55.56	28	9	17	9	1	328	35.51	9	0	1.079	0.97	1.174	1.306	0.11	-0.04	0.23	0.39	0.169088	0.255232	0.852733	0.016498	0.746185	0.8319	0.990777	0.203755	938274	1.01275e+06	910005	1.1885e+06	High	High	High	High	498
High	Master Protein	O54692	Centromere/kinetochore protein zw10 homolog OS=Mus musculus OX=10090 GN=Zw10 PE=1 SV=3	0	81.526	28	16	23	16	1	779	60.05	16	0	1.078	1.155	1.056	0.985	0.11	0.21	0.08	-0.02	0.140277	0.594767	0.291607	0.806685	0.693161	0.968917	0.885753	0.986585	357479	385188	413060	406778	High	High	High	High	499
High	Master Protein	Q8BU03	Periodic tryptophan protein 2 homolog OS=Mus musculus OX=10090 GN=Pwp2 PE=1 SV=1	0	25.609	7	7	8	7	1	919	16.11	7	0	1.078	1.317	1.204	0.985	0.11	0.4	0.27	-0.02	0.175992	0.0738387	0.793816	0.799744	0.754982	0.492089	0.990777	0.986585	229212	247026	301863	297326	High	High	High	High	500
High	Master Protein	Q921N7	Transmembrane protein 70, mitochondrial OS=Mus musculus OX=10090 GN=Tmem70 PE=1 SV=2	0	9.256	13	4	4	4	1	253	10.95	4	0	1.078	1.096	1.029	1.012	0.11	0.13	0.04	0.02	0.171132	0.907197	0.234626	0.921129	0.74784	0.995494	0.847434	0.997966	650831	701400	713095	721614	High	High	High	High	501
High	Master Protein	Q8VE22	28S ribosomal protein S23, mitochondrial OS=Mus musculus OX=10090 GN=Mrps23 PE=1 SV=1	0	66.057	72	12	17	12	1	177	53.26	12	0	1.078	1.107	1.041	1.013	0.11	0.15	0.06	0.02	0.146073	0.861434	0.28248	0.931118	0.70662	0.994496	0.873913	0.997966	2.21887e+06	2.39105e+06	2.45716e+06	2.48893e+06	High	High	High	High	502
High	Master Protein	Q3UI43	BRISC and BRCA1-A complex member 1 OS=Mus musculus OX=10090 GN=Babam1 PE=1 SV=1	0	25.827	20	4	5	4	1	333	15.27	4	0	1.078	1.283	1.263	1.061	0.11	0.36	0.34	0.08	0.151638	0.148147	0.343042	0.711351	0.71585	0.687364	0.911286	0.970754	453902	489238	582520	617805	High	High	High	High	503
High	Master Protein	Q9D8W7	OCIA domain-containing protein 2 OS=Mus musculus OX=10090 GN=Ociad2 PE=1 SV=1	0	63.171	45	8	42	8	1	154	119.86	8	0	1.078	0.958	1.072	1.205	0.11	-0.06	0.1	0.27	0.472367	0.409267	0.836633	0.378148	0.950422	0.915976	0.990777	0.907828	8.80683e+06	9.49051e+06	8.44043e+06	1.01715e+07	High	High	High	High	504
High	Master Protein	P84228	Histone H3.2 OS=Mus musculus OX=10090 GN=H3c15 PE=1 SV=2	0	49.662	60	9	72	3	1	136	176.89	9	0	1.077	1.434	0.92	0.691	0.11	0.52	-0.12	-0.53	0.473616	0.00448706	0.123207	0.00660439	0.950422	0.0675918	0.663069	0.10776	1.15851e+07	1.24818e+07	1.66172e+07	1.14891e+07	High	High	High	High	505
High	Master Protein	Q3U319	E3 ubiquitin-protein ligase BRE1B OS=Mus musculus OX=10090 GN=Rnf40 PE=1 SV=2	0	17.476	6	7	9	3	1	1001	14.25	7	0	1.077	1.347	1.099	0.878	0.11	0.43	0.14	-0.19	0.284478	0.276409	0.555655	0.528418	0.873099	0.850084	0.964415	0.959216	9410.03	10130.6	12676.4	11134.5	High	High	High	High	506
High	Master Protein	Q9D8P4	39S ribosomal protein L17, mitochondrial OS=Mus musculus OX=10090 GN=Mrpl17 PE=1 SV=1	0	9.09	21	4	4	4	1	176	7.08	4	0	1.077	1.194	1.082	0.976	0.11	0.26	0.11	-0.04	0.177106	0.262035	0.497052	0.661103	0.754982	0.838125	0.957561	0.970324	766619	825731	915719	893764	High	High	High	High	507
High	Master Protein	Q8C163	Nuclease EXOG, mitochondrial OS=Mus musculus OX=10090 GN=Exog PE=1 SV=1	0	34.828	24	9	12	7	1	368	28.11	9	1	1.077	1.115	1.029	0.994	0.11	0.16	0.04	-0.01	0.138635	0.814549	0.190234	0.848353	0.692074	0.991263	0.788861	0.994434	280286	301814	312495	310472	High	High	High	High	508
High	Master Protein	Q64321	Zinc finger and BTB domain-containing protein 7B OS=Mus musculus OX=10090 GN=Zbtb7b PE=1 SV=2	0	15.499	10	5	5	5	1	544	11.63	5	0	1.077	1.159	1.126	1.046	0.11	0.21	0.17	0.07	0.128373	0.547746	0.695398	0.818195	0.663659	0.958738	0.986902	0.990603	365927	394135	424159	443865	High	High	High	High	509
High	Master Protein	P24369	Peptidyl-prolyl cis-trans isomerase B OS=Mus musculus OX=10090 GN=Ppib PE=1 SV=2	0	130.837	60	18	74	17	1	216	201.75	18	1	1.077	1.084	1.207	1.199	0.11	0.12	0.27	0.26	0.474217	0.758585	0.404484	0.41693	0.950422	0.986474	0.93783	0.920105	2.04958e+07	2.20798e+07	2.2218e+07	2.66412e+07	High	High	High	High	510
High	Master Protein	P52480	Pyruvate kinase PKM OS=Mus musculus OX=10090 GN=Pkm PE=1 SV=4	0	516.28	72	39	259	38	1	531	876.21	39	1	1.077	1.072	1.302	1.308	0.11	0.1	0.38	0.39	0.477587	0.836154	0.132619	0.171119	0.950422	0.991263	0.681856	0.722841	5.56938e+07	5.99636e+07	5.97069e+07	7.80937e+07	High	High	High	High	511
High	Master Protein	Q61411	GTPase HRas OS=Mus musculus OX=10090 GN=Hras PE=1 SV=2	0	71.531	57	8	21	3	1	189	68.2	8	0	1.076	1.169	0.964	0.888	0.11	0.22	-0.05	-0.17	0.201174	0.509842	0.0749117	0.301364	0.780497	0.945766	0.516127	0.869991	171150	184232	199999	177568	High	High	High	High	512
High	Master Protein	Q91YJ2	Sorting nexin-4 OS=Mus musculus OX=10090 GN=Snx4 PE=1 SV=1	0	12.821	10	5	5	5	1	450	8.89	5	0	1.076	1.145	1.114	1.047	0.11	0.19	0.16	0.07	0.225779	0.716825	0.65883	0.727189	0.823615	0.98508	0.985087	0.975648	114294	123015	130823	137000	High	High	High	High	513
High	Master Protein	Q8R1S0	Ubiquinone biosynthesis monooxygenase COQ6, mitochondrial OS=Mus musculus OX=10090 GN=Coq6 PE=1 SV=3	0	72.719	25	12	20	12	1	476	51.91	12	0	1.076	1.103	1.089	1.063	0.11	0.14	0.12	0.09	0.150218	0.914121	0.552203	0.615279	0.712037	0.995494	0.964415	0.96579	2.25903e+06	2.43137e+06	2.49194e+06	2.64789e+06	High	High	High	High	514
High	Master Protein	P68033	Actin, alpha cardiac muscle 1 OS=Mus musculus OX=10090 GN=Actc1 PE=1 SV=1	0	391.015	64	24	549	9	1	377	1515.99	24	0	1.076	1.091	1.083	1.068	0.11	0.13	0.11	0.1	0.479831	0.715408	0.907026	0.943355	0.950422	0.98508	0.991669	0.999167	9.06325e+07	9.75435e+07	9.88721e+07	1.05613e+08	High	High	High	High	515
High	Master Protein	Q9R0Q1	Synaptotagmin-like protein 4 OS=Mus musculus OX=10090 GN=Sytl4 PE=1 SV=1	0	154.011	36	25	55	24	1	673	156.48	25	1	1.076	1.025	1.053	1.104	0.11	0.04	0.07	0.14	0.238737	0.580095	0.51567	0.433709	0.83594	0.966108	0.959252	0.926949	4.92803e+06	5.30049e+06	5.05334e+06	5.58051e+06	High	High	High	High	516
High	Master Protein	P50431	Serine hydroxymethyltransferase, cytosolic OS=Mus musculus OX=10090 GN=Shmt1 PE=1 SV=3	0	24.837	12	5	9	4	1	478	21.55	5	0	1.076	0.92	0.967	1.131	0.11	-0.12	-0.05	0.18	0.187418	0.121359	0.0711692	0.337062	0.762761	0.62502	0.506547	0.883606	222433	239306	204597	231309	High	High	High	High	517
High	Master Protein	Q9QWR8	Alpha-N-acetylgalactosaminidase OS=Mus musculus OX=10090 GN=Naga PE=1 SV=2	0	45.043	20	9	18	9	1	415	33.83	9	0	1.076	0.973	1.153	1.277	0.11	-0.04	0.21	0.35	0.177585	0.192115	0.992578	0.0161855	0.754982	0.755218	0.999985	0.200322	1.46795e+06	1.58012e+06	1.4278e+06	1.82266e+06	High	High	High	High	518
High	Master Protein	Q9WV02	RNA-binding motif protein, X chromosome OS=Mus musculus OX=10090 GN=Rbmx PE=1 SV=1	0	86.917	42	19	49	4	1	391	115.98	19	0	1.076	1.006	1.208	1.293	0.11	0.01	0.27	0.37	0.163798	0.434083	0.640441	0.0258569	0.739472	0.925756	0.982798	0.277509	861699	927392	866769	1.12066e+06	High	High	High	High	519
High	Master Protein	Q9WV85	Nucleoside diphosphate kinase 3 OS=Mus musculus OX=10090 GN=Nme3 PE=1 SV=3	0	23.326	33	5	10	5	1	169	23.71	5	0	1.075	1.058	1.095	1.112	0.1	0.08	0.13	0.15	0.174999	0.802491	0.499508	0.410732	0.753365	0.990901	0.957561	0.920105	262230	281830	277453	308515	High	High	High	High	520
High	Master Protein	Q91VC3	Eukaryotic initiation factor 4A-III OS=Mus musculus OX=10090 GN=Eif4a3 PE=1 SV=3	0	142.062	41	20	63	16	1	411	163.82	20	0	1.075	1.101	1.188	1.16	0.1	0.14	0.25	0.21	0.171925	0.877988	0.644792	0.194135	0.748696	0.995494	0.983219	0.75386	3.66846e+06	3.9425e+06	4.03941e+06	4.68514e+06	High	High	High	High	521
High	Master Protein	Q91VM9	Inorganic pyrophosphatase 2, mitochondrial OS=Mus musculus OX=10090 GN=Ppa2 PE=1 SV=1	0	113.696	52	18	45	18	1	330	137.1	18	0	1.075	1.006	1.136	1.214	0.1	0.01	0.18	0.28	0.153867	0.309707	0.995906	0.0975929	0.719934	0.876061	0.999985	0.576343	2.7678e+06	2.97618e+06	2.78378e+06	3.38078e+06	High	High	High	High	522
High	Master Protein	Q9DCM2	Glutathione S-transferase kappa 1 OS=Mus musculus OX=10090 GN=Gstk1 PE=1 SV=3	0	185.727	79	18	100	17	1	226	297.32	18	0	1.075	0.919	1.079	1.261	0.1	-0.12	0.11	0.33	0.488754	0.236762	0.884134	0.255971	0.950422	0.813291	0.990777	0.829027	1.86696e+07	2.00628e+07	1.71655e+07	2.1651e+07	High	High	High	High	523
High	Master Protein	Q62093	Serine/arginine-rich splicing factor 2 OS=Mus musculus OX=10090 GN=Srsf2 PE=1 SV=4	0	12.026	21	5	5	5	1	221	6.95	5	0	1.075	1.361	1.597	1.262	0.1	0.44	0.68	0.34	0.162539	0.0300586	0.00101167	0.100649	0.736237	0.27577	0.021708	0.579632	457530	491796	622667	785602	High	High	High	High	524
High	Master Protein	P70269	Cathepsin E OS=Mus musculus OX=10090 GN=Ctse PE=1 SV=2	0	29.88	10	4	37	4	1	397	97.15	4	0	1.075	0.901	1.093	1.303	0.1	-0.15	0.13	0.38	0.48931	0.173037	0.972661	0.179027	0.950422	0.728973	0.998629	0.734416	1.92419e+07	2.06758e+07	1.73444e+07	2.25978e+07	High	High	High	High	525
High	Master Protein	P14211	Calreticulin OS=Mus musculus OX=10090 GN=Calr PE=1 SV=1	0	264.412	63	28	184	28	1	416	585.5	28	0	1.075	0.975	1.248	1.376	0.1	-0.04	0.32	0.46	0.485311	0.514771	0.25988	0.0905726	0.950422	0.95004	0.863956	0.562411	5.28137e+07	5.6788e+07	5.14969e+07	7.08463e+07	High	High	High	High	526
High	Master Protein	P35550	rRNA 2'-O-methyltransferase fibrillarin OS=Mus musculus OX=10090 GN=Fbl PE=1 SV=2	0	186.527	52	20	75	20	1	327	212.95	20	0	1.074	1.21	1.161	1.031	0.1	0.27	0.22	0.04	0.492174	0.193247	0.618787	0.875469	0.950422	0.757621	0.978315	0.995594	9.91766e+06	1.06516e+07	1.19987e+07	1.23692e+07	High	High	High	High	527
High	Master Protein	P53994	Ras-related protein Rab-2A OS=Mus musculus OX=10090 GN=Rab2a PE=1 SV=1	0	172.058	73	16	78	16	1	212	245.5	16	0	1.074	1.085	1.055	1.044	0.1	0.12	0.08	0.06	0.494772	0.751955	0.730916	0.938922	0.950422	0.98508	0.986902	0.998852	1.36199e+07	1.46214e+07	1.47786e+07	1.54265e+07	High	High	High	High	528
High	Master Protein	Q80V03	Uncharacterized aarF domain-containing protein kinase 5 OS=Mus musculus OX=10090 GN=Adck5 PE=2 SV=2	0	25.453	11	5	7	5	1	582	14.26	5	0	1.074	1.048	1.073	1.099	0.1	0.07	0.1	0.14	0.239801	0.671862	0.310219	0.50333	0.838156	0.978969	0.899264	0.954014	34935.7	37526.8	36614.6	40253.8	High	High	High	High	529
High	Master Protein	Q9JHL1	Na(+)/H(+) exchange regulatory cofactor NHE-RF2 OS=Mus musculus OX=10090 GN=Slc9a3r2 PE=1 SV=2	0	19.542	19	5	5	5	1	337	13.28	5	0	1.074	1.058	1.126	1.143	0.1	0.08	0.17	0.19	0.229296	0.748413	0.695702	0.312555	0.828074	0.98508	0.986902	0.874528	164145	176317	173673	198487	High	High	High	High	530
High	Master Protein	Q8VIJ6	Splicing factor, proline- and glutamine-rich OS=Mus musculus OX=10090 GN=Sfpq PE=1 SV=1	0	226.096	44	31	106	30	1	699	279.95	31	1	1.074	1.015	1.215	1.286	0.1	0.02	0.28	0.36	0.492959	0.774302	0.369705	0.208305	0.950422	0.987205	0.91735	0.773269	1.1771e+07	1.26405e+07	1.19495e+07	1.53624e+07	High	High	High	High	531
High	Master Protein	Q99LH2	Phosphatidylserine synthase 1 OS=Mus musculus OX=10090 GN=Ptdss1 PE=1 SV=1	0	38.634	16	7	13	7	1	473	28.27	7	0	1.073	1.011	0.912	0.969	0.1	0.02	-0.13	-0.05	0.186979	0.425058	0.0166632	0.640484	0.762761	0.921315	0.195356	0.970324	1.05521e+06	1.1324e+06	1.06641e+06	1.03324e+06	High	High	High	High	532
High	Master Protein	Q9CXZ1	NADH dehydrogenase [ubiquinone] iron-sulfur protein 4, mitochondrial OS=Mus musculus OX=10090 GN=Ndufs4 PE=1 SV=3	0	117.137	43	11	72	11	1	175	232.44	11	0	1.073	1.003	1	1.07	0.1	0	0	0.1	0.497622	0.691022	0.414586	0.935548	0.950422	0.983544	0.941175	0.997966	2.25159e+07	2.416e+07	2.25792e+07	2.41556e+07	High	High	High	High	533
High	Master Protein	Q9CPW7	Zinc finger matrin-type protein 2 OS=Mus musculus OX=10090 GN=Zmat2 PE=2 SV=1	0.002	7.42	11	3	4	3	1	199	4.21	3	0	1.073	1.117	1.124	1.08	0.1	0.16	0.17	0.11	0.236809	0.919455	0.715181	0.547026	0.834572	0.995494	0.986902	0.965089	103216	110758	115250	124455	High	High	High	High	534
High	Master Protein	Q8BU33	2-hydroxyacyl-CoA lyase 2 OS=Mus musculus OX=10090 GN=Ilvbl PE=1 SV=1	0	116.201	31	13	20	13	1	632	79.88	13	0	1.073	1.053	1.07	1.091	0.1	0.07	0.1	0.13	0.161682	0.636788	0.435424	0.414102	0.73617	0.97492	0.951745	0.920105	2.14154e+06	2.29877e+06	2.25523e+06	2.45971e+06	High	High	High	High	535
High	Master Protein	Q9D773	39S ribosomal protein L2, mitochondrial OS=Mus musculus OX=10090 GN=Mrpl2 PE=1 SV=1	0	20.294	16	5	6	5	1	306	11.66	5	0	1.073	1.018	1.081	1.139	0.1	0.03	0.11	0.19	0.194295	0.55069	0.485282	0.319256	0.767154	0.958738	0.957561	0.880835	766804	822612	780593	888891	High	High	High	High	536
High	Master Protein	Q99MJ9	ATP-dependent RNA helicase DDX50 OS=Mus musculus OX=10090 GN=Ddx50 PE=2 SV=1	0	20.493	8	6	8	5	1	734	18.73	6	0	1.073	1.057	1.166	1.184	0.1	0.08	0.22	0.24	0.19499	0.778523	0.98247	0.19459	0.767551	0.98744	0.999985	0.754487	214565	230329	226800	268520	High	High	High	High	537
High	Master Protein	P97858	Solute carrier family 35 member B1 OS=Mus musculus OX=10090 GN=Slc35b1 PE=1 SV=1	0	11.738	8	2	2	2	1	322	6.58	2	0	1.072	1.34	1.096	0.876	0.1	0.42	0.13	-0.19	0.249484	0.119397	0.445695	0.288485	0.84314	0.621963	0.955524	0.85925	50914.8	54590.9	68243.5	59807.5	High	High	High	High	538
High	Master Protein	Q8C4X2	Casein kinase I isoform gamma-3 OS=Mus musculus OX=10090 GN=Csnk1g3 PE=1 SV=2	0	10.673	9	3	3	3	1	424	8.37	3	0	1.072	1.209	1.077	0.955	0.1	0.27	0.11	-0.07	0.256938	0.369287	0.469697	0.694954	0.853291	0.902677	0.957326	0.970324	135502	145193	163841	156393	High	High	High	High	539
High	Master Protein	Q3U0P5	Ectonucleoside triphosphate diphosphohydrolase 6 OS=Mus musculus OX=10090 GN=Entpd6 PE=1 SV=1	0	9.765	6	2	2	2	1	455	6.4	2	0	1.072	1.283	1.156	0.967	0.1	0.36	0.21	-0.05	0.249143	0.221388	0.780871	0.785837	0.842942	0.787052	0.990777	0.986585	57894.2	62088.4	74253	71801.8	High	High	High	High	540
High	Master Protein	Q8CHK3	Lysophospholipid acyltransferase 7 OS=Mus musculus OX=10090 GN=Mboat7 PE=1 SV=1	0	44.618	13	6	8	6	1	473	30.6	6	0	1.072	1.101	0.998	0.971	0.1	0.14	0	-0.04	0.15721	0.882852	0.0909367	0.686725	0.723286	0.995494	0.571426	0.970324	385927	413648	425047	412630	High	High	High	High	541
High	Master Protein	Q80Y81	Zinc phosphodiesterase ELAC protein 2 OS=Mus musculus OX=10090 GN=Elac2 PE=1 SV=1	0	13.745	5	3	3	3	1	831	6.91	3	0	1.072	1.096	1.036	1.013	0.1	0.13	0.05	0.02	0.253131	0.88461	0.255984	0.893523	0.848535	0.995494	0.862211	0.995594	17229.8	18469.2	18889.5	19140.3	High	High	High	High	542
High	Master Protein	Q91VE0	Long-chain fatty acid transport protein 4 OS=Mus musculus OX=10090 GN=Slc27a4 PE=1 SV=1	0	115.507	43	22	29	21	1	643	94.97	22	1	1.072	1.094	1.038	1.018	0.1	0.13	0.05	0.03	0.159828	0.989792	0.38006	0.861614	0.731937	0.999773	0.917795	0.995594	3.06091e+06	3.28045e+06	3.34713e+06	3.40645e+06	High	High	High	High	543
High	Master Protein	Q8K2C6	NAD-dependent protein deacylase sirtuin-5, mitochondrial OS=Mus musculus OX=10090 GN=Sirt5 PE=1 SV=1	0	51.408	41	10	13	10	1	310	42.15	10	0	1.072	1.121	1.067	1.02	0.1	0.17	0.09	0.03	0.194186	0.707798	0.432764	0.972604	0.767154	0.98508	0.951745	0.999848	929558	996307	1.04248e+06	1.06338e+06	High	High	High	High	544
High	Master Protein	Q922K7	Probable 28S rRNA (cytosine-C(5))-methyltransferase OS=Mus musculus OX=10090 GN=Nop2 PE=1 SV=1	0	58.809	19	13	17	13	1	793	32.26	13	0	1.072	1.166	1.122	1.032	0.1	0.22	0.17	0.05	0.186683	0.42391	0.779774	0.865896	0.762761	0.920952	0.990777	0.995594	1.09e+06	1.1688e+06	1.27076e+06	1.31163e+06	High	High	High	High	545
High	Master Protein	A2AIL4	NADH dehydrogenase (ubiquinone) complex I, assembly factor 6 OS=Mus musculus OX=10090 GN=Ndufaf6 PE=1 SV=1	0.001	8.549	11	2	2	2	1	333	3.02	2	0	1.072	1.081	1.142	1.132	0.1	0.11	0.19	0.18	0.255068	0.819895	0.618362	0.35802	0.850129	0.991263	0.977909	0.891525	25532.3	27358.5	27594.9	31248.8	High	High	High	High	546
High	Master Protein	Q8BVD5	MAGUK p55 subfamily member 7 OS=Mus musculus OX=10090 GN=Mpp7 PE=1 SV=2	0	26.843	15	6	6	6	1	576	11.66	6	0	1.072	1.003	1.076	1.15	0.1	0	0.11	0.2	0.143679	0.41362	0.377179	0.268776	0.70104	0.918566	0.91735	0.844663	368747	395270	369771	425173	High	High	High	High	547
High	Master Protein	P57784	U2 small nuclear ribonucleoprotein A' OS=Mus musculus OX=10090 GN=Snrpa1 PE=1 SV=2	0	63.399	35	10	17	10	1	255	42.94	10	0	1.072	1.042	1.21	1.245	0.1	0.06	0.28	0.32	0.191139	0.583977	0.574008	0.0359847	0.765611	0.967538	0.969841	0.334917	1.36561e+06	1.46413e+06	1.42273e+06	1.77168e+06	High	High	High	High	548
High	Master Protein	P10639	Thioredoxin OS=Mus musculus OX=10090 GN=Txn PE=1 SV=3	0	37.689	51	7	19	7	1	105	46.6	7	0	1.072	1.013	1.31	1.386	0.1	0.02	0.39	0.47	0.228695	0.441911	0.120106	0.0091183	0.828074	0.926837	0.655791	0.137769	4.34942e+06	4.66143e+06	4.40699e+06	6.1071e+06	High	High	High	High	549
High	Master Protein	P11404	Fatty acid-binding protein, heart OS=Mus musculus OX=10090 GN=Fabp3 PE=1 SV=5	0	55.978	52	8	37	8	1	133	93.53	8	0	1.072	1.032	1.384	1.438	0.1	0.04	0.47	0.52	0.50505	0.887401	0.0415561	0.0481981	0.951532	0.995494	0.368367	0.403842	1.63525e+07	1.75248e+07	1.68687e+07	2.42558e+07	High	High	High	High	550
High	Master Protein	Q9D832	DnaJ homolog subfamily B member 4 OS=Mus musculus OX=10090 GN=Dnajb4 PE=1 SV=1	0	21.187	18	6	8	5	1	337	13.79	6	0	1.071	1.527	1.285	0.901	0.1	0.61	0.36	-0.15	0.273433	0.0212571	0.648009	0.436757	0.860803	0.220453	0.984069	0.928587	28613.9	30636.1	43698.4	39358.6	High	High	High	High	551
High	Master Protein	Q9D892	Inosine triphosphate pyrophosphatase OS=Mus musculus OX=10090 GN=Itpa PE=1 SV=2	0	47.908	57	7	11	7	1	198	42.26	7	0	1.071	1.248	1.101	0.945	0.1	0.32	0.14	-0.08	0.192252	0.123775	0.628335	0.521735	0.766789	0.633356	0.981698	0.958135	954922	1.02302e+06	1.19203e+06	1.12673e+06	High	High	High	High	552
High	Master Protein	P62911	60S ribosomal protein L32 OS=Mus musculus OX=10090 GN=Rpl32 PE=1 SV=2	0	72.719	52	10	30	10	1	135	80.87	10	0	1.071	1.239	1.156	0.999	0.1	0.31	0.21	0	0.419961	0.197259	0.739294	0.806944	0.93565	0.763188	0.986902	0.986585	6.37376e+06	6.82533e+06	7.89393e+06	7.88837e+06	High	High	High	High	553
High	Master Protein	Q06335	Amyloid beta precursor like protein 2 OS=Mus musculus OX=10090 GN=Aplp2 PE=1 SV=4	0	9.977	5	3	3	3	1	707	4.98	3	0	1.071	1.074	1.014	1.011	0.1	0.1	0.02	0.02	0.172904	0.908536	0.15184	0.986389	0.749276	0.995494	0.72373	0.999848	279678	299481	300302	303630	High	High	High	High	554
High	Master Protein	Q9CQF8	Ribosomal protein 63, mitochondrial OS=Mus musculus OX=10090 GN=Mrpl57 PE=1 SV=1	0	15.776	28	4	5	4	1	102	17.46	4	0	1.071	1	1.109	1.188	0.1	0	0.15	0.25	0.180784	0.408446	0.678184	0.156739	0.758616	0.915901	0.986902	0.701885	859788	920938	859587	1.02095e+06	High	High	High	High	555
High	Master Protein	D3YXK2	Scaffold attachment factor B1 OS=Mus musculus OX=10090 GN=Safb PE=1 SV=2	0	149.136	32	31	53	24	1	937	109.22	31	7	1.071	1.054	1.223	1.242	0.1	0.08	0.29	0.31	0.170868	0.719534	0.443235	0.0587216	0.74784	0.98508	0.954745	0.457478	3.36021e+06	3.59722e+06	3.54198e+06	4.4004e+06	High	High	High	High	556
High	Master Protein	Q91YN9	BAG family molecular chaperone regulator 2 OS=Mus musculus OX=10090 GN=Bag2 PE=1 SV=1	0.004	5.208	7	2	2	2	1	210	4.44	2	0	1.07	1.307	1.042	0.853	0.1	0.39	0.06	-0.23	0.260174	0.165676	0.255465	0.224846	0.853291	0.72214	0.861675	0.7902	66414.7	71088.7	86823	74086.8	High	High	High	High	557
High	Master Protein	Q5MPP0	Fatty acid 2-hydroxylase OS=Mus musculus OX=10090 GN=Fa2h PE=1 SV=1	0	68.167	40	12	23	12	1	372	61.56	12	0	1.07	1.135	1.001	0.943	0.1	0.18	0	-0.08	0.172902	0.68569	0.162896	0.623527	0.749276	0.982308	0.74491	0.96579	2.62257e+06	2.80491e+06	2.97535e+06	2.80675e+06	High	High	High	High	558
High	Master Protein	Q9CS42	Ribose-phosphate pyrophosphokinase 2 OS=Mus musculus OX=10090 GN=Prps2 PE=1 SV=4	0	125.299	53	17	37	7	1	318	105.58	17	9	1.07	1.145	1.115	1.042	0.1	0.2	0.16	0.06	0.223724	0.526509	0.900907	0.748946	0.819642	0.95201	0.991669	0.979016	4.38569e+06	4.69421e+06	5.02342e+06	5.23224e+06	High	High	High	High	559
High	Master Protein	P27808	Alpha-1,3-mannosyl-glycoprotein 2-beta-N-acetylglucosaminyltransferase OS=Mus musculus OX=10090 GN=Mgat1 PE=1 SV=1	0.001	9.01	7	3	3	3	1	447	8.12	3	0	1.07	1.235	1.23	1.066	0.1	0.3	0.3	0.09	0.213693	0.213831	0.622004	0.663438	0.803906	0.78259	0.980736	0.970324	211033	225898	260633	277751	High	High	High	High	560
High	Master Protein	Q8R016	Bleomycin hydrolase OS=Mus musculus OX=10090 GN=Blmh PE=1 SV=1	0.002	7.278	7	3	3	3	1	455	8.01	3	0	1.07	1.064	1.067	1.073	0.1	0.09	0.09	0.1	0.245091	0.74021	0.435788	0.546833	0.842749	0.98508	0.951745	0.965089	96414.7	103201	102611	110089	High	High	High	High	561
High	Master Protein	Q91VD1	Galectin-12 OS=Mus musculus OX=10090 GN=Lgals12 PE=1 SV=2	0.003	5.908	11	3	3	3	1	314	6.41	3	0	1.069	1.47	0.692	0.503	0.1	0.56	-0.53	-0.99	0.29119	0.0833862	0.00110123	6.00836e-05	0.876704	0.518313	0.0232498	0.0020439	13731.7	14675.5	20186.1	10150.2	High	High	High	High	562
High	Master Protein	Q99MP8	BRCA1-associated protein OS=Mus musculus OX=10090 GN=Brap PE=1 SV=1	0	11.678	9	5	5	4	1	591	4.04	5	0	1.069	1.438	1.128	0.838	0.1	0.52	0.17	-0.25	0.248645	0.0501799	0.5325	0.182068	0.842749	0.387197	0.963215	0.738043	36153.5	38653.1	51987.5	43588	High	High	High	High	563
High	Master Protein	Q9D110	5-formyltetrahydrofolate cyclo-ligase OS=Mus musculus OX=10090 GN=Mthfs PE=2 SV=2	0	30.713	40	8	10	8	1	203	27.87	8	0	1.069	1.18	1.045	0.948	0.1	0.24	0.06	-0.08	0.200637	0.353397	0.267396	0.608384	0.778974	0.897776	0.863956	0.96579	1.65762e+06	1.77271e+06	1.95556e+06	1.85306e+06	High	High	High	High	564
High	Master Protein	Q9D8E6	60S ribosomal protein L4 OS=Mus musculus OX=10090 GN=Rpl4 PE=1 SV=3	0	247.679	55	30	97	30	1	419	274.4	30	0	1.069	1.241	1.104	0.951	0.1	0.31	0.14	-0.07	0.520107	0.125286	0.954914	0.501174	0.954894	0.63522	0.996516	0.953034	2.03037e+07	2.17054e+07	2.52017e+07	2.39699e+07	High	High	High	High	565
High	Master Protein	Q9Z2I9	Succinate--CoA ligase [ADP-forming] subunit beta, mitochondrial OS=Mus musculus OX=10090 GN=Sucla2 PE=1 SV=2	0	310.64	65	31	185	31	1	463	571.85	31	0	1.069	1.112	1.069	1.027	0.1	0.15	0.1	0.04	0.522522	0.588992	0.817751	0.85563	0.955056	0.968502	0.990777	0.995594	4.40493e+07	4.70719e+07	4.89959e+07	5.03102e+07	High	High	High	High	566
High	Master Protein	P61255	60S ribosomal protein L26 OS=Mus musculus OX=10090 GN=Rpl26 PE=1 SV=1	0	46.302	44	11	29	11	1	145	62.08	11	0	1.069	1.255	1.282	1.093	0.1	0.33	0.36	0.13	0.322444	0.150905	0.173504	0.624652	0.895547	0.689986	0.763182	0.96579	5.40793e+06	5.78301e+06	6.78497e+06	7.41631e+06	High	High	High	High	567
High	Master Protein	Q9WUM5	Succinate--CoA ligase [ADP/GDP-forming] subunit alpha, mitochondrial OS=Mus musculus OX=10090 GN=Suclg1 PE=1 SV=4	0	166.272	42	15	71	15	1	346	237.31	15	0	1.069	1.022	1.071	1.12	0.1	0.03	0.1	0.16	0.518271	0.824665	0.832193	0.707343	0.954894	0.991263	0.990777	0.970754	2.36819e+07	2.53245e+07	2.42147e+07	2.7124e+07	High	High	High	High	568
High	Master Protein	P50544	Very long-chain specific acyl-CoA dehydrogenase, mitochondrial OS=Mus musculus OX=10090 GN=Acadvl PE=1 SV=3	0	526.833	75	47	193	47	1	656	644.65	47	0	1.069	1.024	1.11	1.158	0.1	0.03	0.15	0.21	0.521422	0.83658	0.919906	0.555557	0.954894	0.991263	0.991669	0.965089	3.94344e+07	4.21479e+07	4.03898e+07	4.67791e+07	High	High	High	High	569
High	Master Protein	Q9D273	Corrinoid adenosyltransferase MMAB OS=Mus musculus OX=10090 GN=Mmab PE=1 SV=1	0	41.154	35	8	11	8	1	237	36.61	8	0	1.069	1.042	1.129	1.159	0.1	0.06	0.18	0.21	0.216443	0.65568	0.821713	0.191954	0.80746	0.97492	0.990777	0.748565	1.00958e+06	1.07958e+06	1.05195e+06	1.21934e+06	High	High	High	High	570
High	Master Protein	P48036	Annexin A5 OS=Mus musculus OX=10090 GN=Anxa5 PE=1 SV=1	0	138.524	60	24	72	23	1	319	189.11	24	0	1.069	0.972	1.11	1.221	0.1	-0.04	0.15	0.29	0.521058	0.496989	0.917775	0.354111	0.954894	0.944906	0.991669	0.888764	9.76939e+06	1.04422e+07	9.49659e+06	1.15932e+07	High	High	High	High	571
High	Master Protein	P14152	Malate dehydrogenase, cytoplasmic OS=Mus musculus OX=10090 GN=Mdh1 PE=1 SV=3	0	135.22	50	20	81	19	1	334	235.68	20	1	1.069	0.95	1.308	1.471	0.1	-0.07	0.39	0.56	0.522006	0.377332	0.122822	0.0339109	0.954894	0.904431	0.662533	0.321794	2.67007e+07	2.85353e+07	2.53778e+07	3.73293e+07	High	High	High	High	572
High	Master Protein	Q9CZ69	CKLF-like MARVEL transmembrane domain-containing protein 6 OS=Mus musculus OX=10090 GN=Cmtm6 PE=1 SV=1	0.002	6.606	9	2	4	2	1	183	7.46	2	0	1.068	1.169	0.99	0.905	0.1	0.23	-0.01	-0.14	0.201302	0.416123	0.0817769	0.334452	0.780497	0.918636	0.545011	0.882423	1.47986e+06	1.58105e+06	1.72976e+06	1.56588e+06	High	High	High	High	573
High	Master Protein	Q9CZ13	Cytochrome b-c1 complex subunit 1, mitochondrial OS=Mus musculus OX=10090 GN=Uqcrc1 PE=1 SV=2	0	315.42	55	23	208	22	1	480	803.11	23	1	1.068	1.056	0.979	0.989	0.09	0.08	-0.03	-0.02	0.527862	0.941133	0.315051	0.672571	0.95879	0.995909	0.901141	0.970324	9.01958e+07	9.63012e+07	9.52849e+07	9.42338e+07	High	High	High	High	574
High	Master Protein	Q61550	Double-strand-break repair protein rad21 homolog OS=Mus musculus OX=10090 GN=Rad21 PE=1 SV=3	0	42.447	25	13	15	13	1	635	23.35	13	0	1.068	1.122	1.036	0.986	0.09	0.17	0.05	-0.02	0.178613	0.753305	0.233225	0.872799	0.755414	0.98508	0.846041	0.995594	1.81473e+06	1.93732e+06	2.03583e+06	2.0071e+06	High	High	High	High	575
High	Master Protein	Q9ERU3	Zinc finger protein 22 OS=Mus musculus OX=10090 GN=Znf22 PE=1 SV=2	0	19.783	22	5	8	4	1	237	13.17	5	0	1.068	1.093	1.036	1.012	0.09	0.13	0.05	0.02	0.209163	0.928579	0.267536	0.942645	0.795203	0.995494	0.863956	0.999167	687526	734186	751395	760515	High	High	High	High	576
High	Master Protein	Q91V27	Melanophilin OS=Mus musculus OX=10090 GN=Mlph PE=1 SV=1	0	64.541	25	13	20	13	1	590	48.83	13	0	1.068	1.224	1.213	1.058	0.09	0.29	0.28	0.08	0.204132	0.171867	0.539509	0.607691	0.785208	0.728973	0.964415	0.96579	1.61665e+06	1.7263e+06	1.97891e+06	2.09447e+06	High	High	High	High	577
High	Master Protein	Q9D338	39S ribosomal protein L19, mitochondrial OS=Mus musculus OX=10090 GN=Mrpl19 PE=1 SV=1	0	43.851	24	8	13	8	1	292	30.6	8	0	1.068	1.053	1.103	1.119	0.1	0.08	0.14	0.16	0.208772	0.797977	0.632043	0.439135	0.795203	0.990464	0.981698	0.92861	658371	703240	693537	775970	High	High	High	High	578
High	Master Protein	Q9QXA5	U6 snRNA-associated Sm-like protein LSm4 OS=Mus musculus OX=10090 GN=Lsm4 PE=1 SV=1	0	11.869	27	4	4	4	1	137	11.19	4	0	1.068	1.098	1.177	1.145	0.09	0.13	0.23	0.19	0.169639	0.924825	0.933832	0.323726	0.746185	0.995494	0.993922	0.880835	381924	407878	419291	479934	High	High	High	High	579
High	Master Protein	Q8K2I4	Beta-mannosidase OS=Mus musculus OX=10090 GN=Manba PE=1 SV=1	0	17.523	7	6	6	6	1	879	12.69	6	0	1.068	0.909	1.067	1.253	0.09	-0.14	0.09	0.33	0.245472	0.092238	0.385247	0.0922558	0.842749	0.549943	0.92114	0.56371	165215	176448	150257	188231	High	High	High	High	580
High	Master Protein	Q8CCS6	Polyadenylate-binding protein 2 OS=Mus musculus OX=10090 GN=Pabpn1 PE=1 SV=3	0	16.124	12	4	5	4	1	302	8.83	4	0	1.068	1.006	1.391	1.477	0.1	0.01	0.48	0.56	0.177383	0.435737	0.0535928	0.00228343	0.754982	0.925756	0.432001	0.0450261	443362	473704	446236	658900	High	High	High	High	581
High	Master Protein	Q9CRB9	MICOS complex subunit Mic19 OS=Mus musculus OX=10090 GN=Chchd3 PE=1 SV=1	0	205.541	67	20	113	19	1	227	348.18	20	1	1.067	1.001	1.001	1.068	0.09	0	0	0.09	0.531615	0.67923	0.423012	0.946501	0.960244	0.981182	0.946084	0.999848	3.22975e+07	3.44627e+07	3.2331e+07	3.4514e+07	High	High	High	High	582
High	Master Protein	P62918	60S ribosomal protein L8 OS=Mus musculus OX=10090 GN=Rpl8 PE=1 SV=2	0	116.305	61	19	49	19	1	257	142.83	19	0	1.067	1.283	1.281	1.066	0.09	0.36	0.36	0.09	0.52966	0.0667569	0.174198	0.955585	0.958824	0.461146	0.765654	0.999848	1.14164e+07	1.21857e+07	1.46487e+07	1.56099e+07	High	High	High	High	583
High	Master Protein	Q9D5T0	Outer mitochondrial transmembrane helix translocase OS=Mus musculus OX=10090 GN=Atad1 PE=1 SV=1	0	113.483	49	20	34	20	1	361	85.1	20	0	1.067	1.078	1.093	1.081	0.09	0.11	0.13	0.11	0.187035	0.930241	0.701157	0.485259	0.762761	0.995494	0.986902	0.948824	3.39396e+06	3.62041e+06	3.65986e+06	3.95789e+06	High	High	High	High	584
High	Master Protein	Q80YR5	Scaffold attachment factor B2 OS=Mus musculus OX=10090 GN=Safb2 PE=1 SV=2	0	120.381	25	21	32	14	1	991	77.77	21	0	1.067	1.113	1.192	1.142	0.09	0.15	0.25	0.19	0.210412	0.72581	0.770483	0.312444	0.797235	0.98508	0.989551	0.874528	796727	849853	886984	1.01338e+06	High	High	High	High	585
High	Master Protein	P99026	Proteasome subunit beta type-4 OS=Mus musculus OX=10090 GN=Psmb4 PE=1 SV=1	0	29.001	23	5	8	5	1	264	19.64	5	0	1.067	1.154	1.354	1.252	0.09	0.21	0.44	0.32	0.154998	0.575189	0.156774	0.0549776	0.721102	0.965076	0.732125	0.438089	295202	314964	340659	426473	High	High	High	High	586
High	Master Protein	P13020	Gelsolin OS=Mus musculus OX=10090 GN=Gsn PE=1 SV=3	0	235.812	39	30	121	30	1	780	364.07	30	0	1.067	0.954	1.15	1.287	0.09	-0.07	0.2	0.36	0.52962	0.395333	0.679247	0.205816	0.958824	0.910188	0.986902	0.767948	3.42874e+07	3.65978e+07	3.2707e+07	4.20939e+07	High	High	High	High	587
High	Master Protein	Q3TLS3	GDP-D-glucose phosphorylase 1 OS=Mus musculus OX=10090 GN=Gdpgp1 PE=1 SV=2	0.006	4.773	7	2	2	2	1	386	2.14	2	0	1.066	1.416	1.08	0.813	0.09	0.5	0.11	-0.3	0.260713	0.0341583	0.478246	0.122157	0.853291	0.297504	0.957561	0.632757	98961.3	105536	140123	113983	High	High	High	High	588
High	Master Protein	Q8R5K4	Nucleolar protein 6 OS=Mus musculus OX=10090 GN=Nol6 PE=2 SV=2	0	22.704	7	8	8	8	1	1152	16.57	8	0	1.066	1.341	1.037	0.825	0.09	0.42	0.05	-0.28	0.203114	0.0277633	0.272203	0.0637572	0.782325	0.263506	0.867824	0.471253	650551	693579	872072	719123	High	High	High	High	589
High	Master Protein	P0C605	cGMP-dependent protein kinase 1 OS=Mus musculus OX=10090 GN=Prkg1 PE=1 SV=1	0.002	7.535	7	4	4	3	1	671	0	4	0	1.066	1.538	1.278	0.886	0.09	0.62	0.35	-0.17	0.253326	0.0108962	0.658447	0.32759	0.848701	0.137955	0.985087	0.880835	40740.9	43422.4	62653.4	55513.2	High	High	High	High	590
High	Master Protein	Q8R5A6	TBC1 domain family member 22A OS=Mus musculus OX=10090 GN=Tbc1d22a PE=1 SV=3	0	10.108	7	4	4	4	1	516	7.36	4	0	1.066	1.358	1.146	0.899	0.09	0.44	0.2	-0.15	0.235795	0.0376733	0.841618	0.296569	0.833667	0.319976	0.990777	0.865482	170352	181563	231398	208023	High	High	High	High	591
High	Master Protein	P22366	Myeloid differentiation primary response protein MyD88 OS=Mus musculus OX=10090 GN=Myd88 PE=1 SV=3	0.002	6.148	7	2	2	2	1	296	4.11	2	0	1.066	1.378	1.253	0.97	0.09	0.46	0.33	-0.04	0.271205	0.0599646	0.586489	0.813822	0.860694	0.432846	0.970956	0.989968	88820.9	94672.6	122353	118657	High	High	High	High	592
High	Master Protein	Q8BJ03	Cytochrome c oxidase assembly protein COX15 homolog OS=Mus musculus OX=10090 GN=Cox15 PE=1 SV=1	0	81.939	26	8	30	8	1	413	85.02	8	0	1.066	1.026	1.044	1.085	0.09	0.04	0.06	0.12	0.246372	0.484733	0.406313	0.474107	0.842749	0.940372	0.939121	0.944206	4.00068e+06	4.26511e+06	4.10313e+06	4.45214e+06	High	High	High	High	593
High	Master Protein	Q505D1	Serine/threonine-protein phosphatase 6 regulatory ankyrin repeat subunit A OS=Mus musculus OX=10090 GN=Ankrd28 PE=1 SV=1	0	9.529	4	3	3	2	1	1053	3	3	0	1.066	1.048	1.077	1.097	0.09	0.07	0.11	0.13	0.268669	0.661063	0.471252	0.445199	0.860694	0.97492	0.957561	0.930052	85385.1	91062.9	89447.9	98115.5	High	High	High	High	594
High	Master Protein	Q5SV80	Unconventional myosin-XIX OS=Mus musculus OX=10090 GN=Myo19 PE=1 SV=1	0	104.701	28	20	25	20	1	963	78.45	20	0	1.066	1.045	1.099	1.121	0.09	0.06	0.14	0.17	0.185044	0.578292	0.75215	0.307389	0.762761	0.965076	0.986902	0.870934	2.92398e+06	3.11767e+06	3.05551e+06	3.42664e+06	High	High	High	High	595
High	Master Protein	A0A0G2JDV3	Guanylate-binding protein 6 OS=Mus musculus OX=10090 GN=Gbp6 PE=2 SV=2	0	19.087	7	4	4	4	1	611	11.24	4	0	1.065	2.001	1.472	0.783	0.09	1	0.56	-0.35	0.263022	6.98152e-08	0.052951	0.0519993	0.854774	3.53204e-06	0.430042	0.421281	97731.8	104064	195522	153173	High	High	High	High	596
High	Master Protein	P54818	Galactocerebrosidase OS=Mus musculus OX=10090 GN=Galc PE=1 SV=2	0	12.963	4	2	2	2	1	684	8.2	2	0	1.065	1.197	0.966	0.86	0.09	0.26	-0.05	-0.22	0.2881	0.503813	0.0729912	0.250336	0.875812	0.944906	0.512613	0.822346	72508.2	77237.4	86795.6	74628.7	High	High	High	High	597
High	Master Protein	O08917	Flotillin-1 OS=Mus musculus OX=10090 GN=Flot1 PE=1 SV=1	0	23.522	20	6	8	5	1	428	18.8	6	0	1.065	1.161	1.163	1.067	0.09	0.21	0.22	0.09	0.272697	0.74543	0.750027	0.622195	0.860803	0.98508	0.986902	0.96579	47727.1	50816.3	55393.4	59115.3	High	High	High	High	598
High	Master Protein	Q9WV32	Actin-related protein 2/3 complex subunit 1B OS=Mus musculus OX=10090 GN=Arpc1b PE=1 SV=4	0	134.362	52	18	45	17	1	372	156.19	18	1	1.065	1.034	1.131	1.165	0.09	0.05	0.18	0.22	0.541958	0.9041	0.791482	0.530611	0.967177	0.995494	0.990777	0.959664	9.61085e+06	1.02381e+07	9.93743e+06	1.15772e+07	High	High	High	High	599
High	Master Protein	Q922S4	cGMP-dependent 3',5'-cyclic phosphodiesterase OS=Mus musculus OX=10090 GN=Pde2a PE=1 SV=4	0	15.9	4	3	4	3	1	939	10.18	3	0	1.065	1.092	2.11	2.058	0.09	0.13	1.08	1.04	0.276447	0.862927	2.78043e-06	5.62128e-08	0.863992	0.995146	0.000112279	3.89274e-06	29810.5	31737	32546.6	66970	High	High	High	High	600
High	Master Protein	Q9CQW1	Synaptobrevin homolog YKT6 OS=Mus musculus OX=10090 GN=Ykt6 PE=1 SV=1	0	112.658	75	14	44	14	1	198	148.25	14	0	1.064	1.202	1.037	0.918	0.09	0.27	0.05	-0.12	0.513729	0.295362	0.518798	0.398793	0.95405	0.8662	0.959851	0.920105	7.2405e+06	7.70322e+06	8.70241e+06	7.98568e+06	High	High	High	High	601
High	Master Protein	Q9CQS2	H/ACA ribonucleoprotein complex subunit 3 OS=Mus musculus OX=10090 GN=Nop10 PE=3 SV=1	0.002	7.455	34	2	3	2	1	64	8.64	2	0	1.064	1.138	1.013	0.946	0.09	0.19	0.02	-0.08	0.200416	0.716938	0.143672	0.553998	0.778864	0.98508	0.711627	0.965089	455237	484174	518147	490322	High	High	High	High	602
High	Master Protein	Q9CZR3	Mitochondrial import receptor subunit TOM40B OS=Mus musculus OX=10090 GN=Tomm40l PE=1 SV=1	0	22.199	18	5	6	5	1	308	20.7	5	0	1.064	1.036	0.995	1.023	0.09	0.05	-0.01	0.03	0.182939	0.616492	0.0926733	0.940742	0.761574	0.97492	0.578287	0.998852	382441	407092	396129	405250	High	High	High	High	603
High	Master Protein	Q9ESD6	CKLF-like MARVEL transmembrane domain-containing protein 7 OS=Mus musculus OX=10090 GN=Cmtm7 PE=1 SV=1	0	16.074	19	2	3	2	1	167	12.54	2	0	1.064	1.135	1.13	1.059	0.09	0.18	0.18	0.08	0.169996	0.686023	0.693747	0.746663	0.746185	0.982308	0.986902	0.978301	299695	318781	340163	360109	High	High	High	High	604
High	Master Protein	Q3UUQ7	GPI inositol-deacylase OS=Mus musculus OX=10090 GN=Pgap1 PE=1 SV=3	0	193.669	35	28	77	27	1	922	181.04	28	0	1.064	0.905	0.977	1.148	0.09	-0.14	-0.03	0.2	0.552032	0.184584	0.306411	0.594266	0.967506	0.741169	0.894895	0.96579	9.79373e+06	1.04162e+07	8.86289e+06	1.01716e+07	High	High	High	High	605
High	Master Protein	Q99NB9	Splicing factor 3B subunit 1 OS=Mus musculus OX=10090 GN=Sf3b1 PE=1 SV=1	0	256.764	39	46	80	46	1	1304	213.96	46	0	1.064	1.091	1.174	1.145	0.09	0.13	0.23	0.2	0.546976	0.748712	0.55482	0.60496	0.967506	0.98508	0.964415	0.96579	8.32124e+06	8.85724e+06	9.07688e+06	1.0395e+07	High	High	High	High	606
High	Master Protein	P35285	Ras-related protein Rab-22A OS=Mus musculus OX=10090 GN=Rab22a PE=1 SV=2	0	53.089	49	8	14	6	1	194	42.28	8	0	1.063	1.054	0.941	0.95	0.09	0.08	-0.09	-0.07	0.243276	0.752433	0.0393785	0.604468	0.842749	0.98508	0.358351	0.96579	188716	200692	198884	188919	High	High	High	High	607
High	Master Protein	Q80X71	Transmembrane protein 106B OS=Mus musculus OX=10090 GN=Tmem106b PE=1 SV=1	0	28.466	23	6	7	6	1	275	16.34	6	0	1.063	1.138	1.053	0.984	0.09	0.19	0.07	-0.02	0.272292	0.793764	0.345006	0.953593	0.860803	0.990024	0.911286	0.999848	102904	109343	117069	115138	High	High	High	High	608
High	Master Protein	Q9D2J4	V-set and immunoglobulin domain-containing protein 1 OS=Mus musculus OX=10090 GN=Vsig1 PE=1 SV=1	0	59.463	11	4	29	4	1	407	92.84	4	0	1.063	1.143	1.067	0.993	0.09	0.19	0.09	-0.01	0.358897	0.571529	0.601567	0.905041	0.918957	0.965076	0.970956	0.995594	5.47619e+06	5.8201e+06	6.2574e+06	6.21286e+06	High	High	High	High	609
High	Master Protein	O35623	BET1 homolog OS=Mus musculus OX=10090 GN=Bet1 PE=1 SV=1	0	17.312	31	3	3	3	1	118	7.81	3	0	1.063	1.044	1.024	1.043	0.09	0.06	0.03	0.06	0.293469	0.632303	0.186973	0.750233	0.876704	0.97492	0.783318	0.979205	71663.8	76163.8	74809.9	78001.4	High	High	High	High	610
High	Master Protein	Q5SSH7	Zinc finger ZZ-type and EF-hand domain-containing protein 1 OS=Mus musculus OX=10090 GN=Zzef1 PE=1 SV=2	0	99.533	9	23	25	23	1	2924	64.92	23	0	1.063	1.061	1.054	1.056	0.09	0.09	0.08	0.08	0.226591	0.817809	0.354919	0.732586	0.824688	0.991263	0.914975	0.976505	951628	1.01199e+06	1.00999e+06	1.06674e+06	High	High	High	High	611
High	Master Protein	Q8BHD7	Polypyrimidine tract-binding protein 3 OS=Mus musculus OX=10090 GN=Ptbp3 PE=1 SV=1	0	120.352	33	13	41	10	1	523	127.42	13	0	1.063	1.08	1.084	1.067	0.09	0.11	0.12	0.09	0.206333	0.886772	0.527109	0.556908	0.789881	0.995494	0.961903	0.965089	2.44539e+06	2.59865e+06	2.64063e+06	2.81735e+06	High	High	High	High	612
High	Master Protein	Q9DBE8	Alpha-1,3/1,6-mannosyltransferase ALG2 OS=Mus musculus OX=10090 GN=Alg2 PE=1 SV=2	0	27.289	20	7	7	7	1	415	18.88	7	0	1.063	1.056	1.064	1.07	0.09	0.08	0.09	0.1	0.221588	0.832965	0.406333	0.669934	0.81644	0.991263	0.939121	0.970324	858070	911792	906451	969898	High	High	High	High	613
High	Master Protein	Q9DBP5	UMP-CMP kinase OS=Mus musculus OX=10090 GN=Cmpk1 PE=1 SV=1	0	105.157	60	10	42	10	1	196	113.87	10	0	1.063	1.14	1.162	1.083	0.09	0.19	0.22	0.12	0.356898	0.585244	0.724673	0.637997	0.918483	0.967694	0.986902	0.970324	5.47955e+06	5.82496e+06	6.24598e+06	6.76576e+06	High	High	High	High	614
High	Master Protein	Q8BKZ9	Pyruvate dehydrogenase protein X component, mitochondrial OS=Mus musculus OX=10090 GN=Pdhx PE=1 SV=1	0	93.366	33	15	41	15	1	501	123.49	15	0	1.063	1.079	1.147	1.13	0.09	0.11	0.2	0.18	0.555463	0.79097	0.698845	0.667344	0.967671	0.988932	0.986902	0.970324	1.02247e+07	1.08686e+07	1.10322e+07	1.2463e+07	High	High	High	High	615
High	Master Protein	Q9CQQ7	ATP synthase F(0) complex subunit B1, mitochondrial OS=Mus musculus OX=10090 GN=Atp5pb PE=1 SV=1	0	219.465	61	22	214	21	1	256	551.5	22	0	1.063	0.978	1.06	1.152	0.09	-0.03	0.08	0.2	0.55636	0.532868	0.761573	0.579577	0.967671	0.954499	0.988083	0.96579	1.11584e+08	1.18595e+08	1.09137e+08	1.25704e+08	High	High	High	High	616
High	Master Protein	Q9CQX8	Alpha-ketoglutarate dehydrogenase component 4 OS=Mus musculus OX=10090 GN=Mrps36 PE=1 SV=1	0	49.459	47	4	17	4	1	102	58.2	4	0	1.063	1.002	1.086	1.152	0.09	0	0.12	0.2	0.244804	0.384852	0.53135	0.226555	0.842749	0.906777	0.963215	0.79051	1.0235e+06	1.08806e+06	1.026e+06	1.18185e+06	High	High	High	High	617
High	Master Protein	Q80XN0	D-beta-hydroxybutyrate dehydrogenase, mitochondrial OS=Mus musculus OX=10090 GN=Bdh1 PE=1 SV=2	0	258.693	60	20	125	20	1	343	402.42	20	0	1.063	0.995	1.093	1.167	0.09	-0.01	0.13	0.22	0.556998	0.636655	0.970333	0.521737	0.967671	0.97492	0.998629	0.958135	2.79882e+07	2.97437e+07	2.78356e+07	3.24977e+07	High	High	High	High	618
High	Master Protein	Q9CWU9	Nucleoporin Nup37 OS=Mus musculus OX=10090 GN=Nup37 PE=1 SV=2	0	32.67	26	6	8	6	1	326	24.43	6	0	1.062	1.073	0.993	0.983	0.09	0.1	-0.01	-0.02	0.240476	0.868417	0.121067	0.772811	0.840004	0.995494	0.659877	0.986585	599999	636999	643570	632816	High	High	High	High	619
High	Master Protein	P63321	Ras-related protein Ral-A OS=Mus musculus OX=10090 GN=Rala PE=1 SV=1	0	73.223	41	10	29	7	1	206	78.22	10	0	1.062	1.034	1.016	1.043	0.09	0.05	0.02	0.06	0.209192	0.481134	0.206021	0.702322	0.795203	0.939342	0.816083	0.970324	2.6054e+06	2.76669e+06	2.69348e+06	2.80967e+06	High	High	High	High	620
High	Master Protein	P10649	Glutathione S-transferase Mu 1 OS=Mus musculus OX=10090 GN=Gstm1 PE=1 SV=2	0	139.558	71	17	76	10	1	218	210.5	17	4	1.062	0.863	0.88	1.083	0.09	-0.21	-0.18	0.12	0.562269	0.0790617	0.053223	0.873014	0.969709	0.508301	0.431649	0.995594	1.10545e+07	1.17381e+07	9.54032e+06	1.03329e+07	High	High	High	High	621
High	Master Protein	P38647	Stress-70 protein, mitochondrial OS=Mus musculus OX=10090 GN=Hspa9 PE=1 SV=3	0	635.325	61	55	347	54	1	679	1032.84	55	1	1.062	1.014	1.15	1.205	0.09	0.02	0.2	0.27	0.560605	0.764794	0.680221	0.399493	0.969515	0.987135	0.986902	0.920105	7.73361e+07	8.214e+07	7.84005e+07	9.44609e+07	High	High	High	High	622
High	Master Protein	P52196	Thiosulfate sulfurtransferase OS=Mus musculus OX=10090 GN=Tst PE=1 SV=3	0	125.465	53	16	74	16	1	297	228.74	16	0	1.062	0.872	1.091	1.329	0.09	-0.2	0.13	0.41	0.562958	0.0954839	0.95908	0.141503	0.969709	0.561137	0.996516	0.680266	1.81162e+07	1.92344e+07	1.57892e+07	2.09816e+07	High	High	High	High	623
High	Master Protein	O88379	Bromodomain adjacent to zinc finger domain protein 1A OS=Mus musculus OX=10090 GN=Baz1a PE=1 SV=3	0.001	8.543	2	3	3	3	1	1555	4.78	3	0	1.062	1.279	1.755	1.457	0.09	0.36	0.81	0.54	0.28928	0.225169	0.000823005	0.003902	0.876278	0.790496	0.0181969	0.0704905	54186.2	57548.1	69318.1	100985	High	High	High	High	624
High	Master Protein	Q8BZX4	Splicing regulatory glutamine/lysine-rich protein 1 OS=Mus musculus OX=10090 GN=Srek1 PE=2 SV=1	0.002	6.614	4	2	2	2	1	494	2.65	2	0	1.062	1.12	1.577	1.497	0.09	0.16	0.66	0.58	0.284304	0.983225	0.0295515	0.00372209	0.873099	0.999773	0.292746	0.0680862	31729.2	33708.3	35524.4	53172	High	High	High	High	625
High	Master Protein	P55050	Fatty acid-binding protein, intestinal OS=Mus musculus OX=10090 GN=Fabp2 PE=1 SV=2	0.003	5.613	13	2	2	2	1	132	4.82	2	0	1.062	0.663	1.017	1.629	0.09	-0.59	0.03	0.7	0.270192	1.65803e-05	0.219162	0.000209544	0.860694	0.000518625	0.836421	0.00634854	165508	175695	109762	178770	High	High	High	High	626
High	Master Protein	Q8BK03	Mitoguardin 2 OS=Mus musculus OX=10090 GN=Miga2 PE=1 SV=1	0	39.448	19	9	12	9	1	593	35.55	9	0	1.061	1.056	1.037	1.043	0.09	0.08	0.05	0.06	0.193174	0.730851	0.20336	0.798656	0.767154	0.98508	0.810514	0.986585	376083	399201	396994	413999	High	High	High	High	627
High	Master Protein	Q8K411	Presequence protease, mitochondrial OS=Mus musculus OX=10090 GN=Pitrm1 PE=1 SV=1	0	171.916	35	32	52	32	1	1036	156.65	32	0	1.061	1.021	1.108	1.152	0.09	0.03	0.15	0.2	0.277905	0.49561	0.856775	0.258362	0.863992	0.944906	0.990777	0.831517	4.34367e+06	4.60906e+06	4.43411e+06	5.10831e+06	High	High	High	High	628
High	Master Protein	P23953	Carboxylesterase 1C OS=Mus musculus OX=10090 GN=Ces1c PE=1 SV=4	0	23.434	16	7	11	4	1	554	21.41	7	0	1.061	1.052	1.216	1.226	0.08	0.07	0.28	0.29	0.259026	0.687008	0.983033	0.137748	0.853291	0.982308	0.999985	0.669621	22355.6	23710.4	23523.2	28838	High	High	High	High	629
High	Master Protein	P54754	Ephrin type-B receptor 3 OS=Mus musculus OX=10090 GN=Ephb3 PE=1 SV=2	0.002	7.683	4	3	4	3	1	993	6.52	3	0	1.06	1.079	1.014	0.996	0.08	0.11	0.02	-0.01	0.189799	0.953342	0.14181	0.830483	0.76486	0.998298	0.704807	0.992256	312352	331173	337116	335828	High	High	High	High	630
High	Master Protein	P55258	Ras-related protein Rab-8A OS=Mus musculus OX=10090 GN=Rab8a PE=1 SV=2	0	90.771	55	13	73	5	1	207	205.89	13	4	1.06	1.098	1.027	0.992	0.08	0.13	0.04	-0.01	0.459537	0.84353	0.389106	0.880588	0.950422	0.992047	0.925937	0.995594	6.10005e+06	6.46575e+06	6.69804e+06	6.642e+06	High	High	High	High	631
High	Master Protein	Q9CPT3	N-acylneuraminate-9-phosphatase OS=Mus musculus OX=10090 GN=Nanp PE=1 SV=1	0	16.144	20	4	5	4	1	248	15.76	4	0	1.06	1.195	1.141	1.013	0.08	0.26	0.19	0.02	0.177724	0.370552	0.78609	0.996677	0.754982	0.902677	0.990777	0.999848	316116	335197	377605	382498	High	High	High	High	632
High	Master Protein	Q8CD10	Calcium uptake protein 2, mitochondrial OS=Mus musculus OX=10090 GN=Micu2 PE=1 SV=2	0	69.488	28	11	20	11	1	432	65.49	11	0	1.06	1.061	1.075	1.074	0.08	0.09	0.1	0.1	0.236786	0.76902	0.463999	0.588792	0.834572	0.987205	0.957031	0.96579	1.17472e+06	1.24534e+06	1.24649e+06	1.33815e+06	High	High	High	High	633
High	Master Protein	Q7TMF3	NADH dehydrogenase [ubiquinone] 1 alpha subcomplex subunit 12 OS=Mus musculus OX=10090 GN=Ndufa12 PE=1 SV=2	0	144.508	88	14	110	14	1	145	381.68	14	0	1.06	1.01	1.032	1.083	0.08	0.01	0.05	0.12	0.572358	0.740048	0.59155	0.872074	0.971298	0.98508	0.970956	0.995594	3.16712e+07	3.35766e+07	3.19917e+07	3.46561e+07	High	High	High	High	634
High	Master Protein	Q9WV70	Nucleolar complex protein 2 homolog OS=Mus musculus OX=10090 GN=Noc2l PE=1 SV=2	0	13.526	6	5	5	5	1	747	10.97	5	0	1.059	1.364	1.008	0.782	0.08	0.45	0.01	-0.35	0.270516	0.0331971	0.15448	0.0228276	0.860694	0.292105	0.72978	0.254458	183990	194755	250914	196322	High	High	High	High	635
High	Master Protein	O88520	Leucine-rich repeat protein SHOC-2 OS=Mus musculus OX=10090 GN=Shoc2 PE=1 SV=2	0	13.402	8	4	4	4	1	582	10.46	4	0	1.059	1.299	1.057	0.861	0.08	0.38	0.08	-0.22	0.207639	0.0943353	0.297152	0.154878	0.792407	0.558281	0.887903	0.697853	339577	359446	441213	379922	High	High	High	High	636
High	Master Protein	P52624	Uridine phosphorylase 1 OS=Mus musculus OX=10090 GN=Upp1 PE=1 SV=2	0.002	7.503	13	3	3	3	1	311	4.24	3	0	1.059	1.238	1.169	1	0.08	0.31	0.23	0	0.261203	0.221451	0.983896	0.900609	0.85388	0.787052	0.999985	0.995594	192639	204078	238531	238624	High	High	High	High	637
High	Master Protein	P62492	Ras-related protein Rab-11A OS=Mus musculus OX=10090 GN=Rab11a PE=1 SV=3	0	152.934	63	14	94	2	1	216	297.53	14	13	1.059	1.077	1.046	1.028	0.08	0.11	0.06	0.04	0.578714	0.802043	0.673603	0.862299	0.973181	0.990901	0.986902	0.995594	3.93981e+07	4.17272e+07	4.24424e+07	4.36387e+07	High	High	High	High	638
High	Master Protein	Q8BK72	28S ribosomal protein S27, mitochondrial OS=Mus musculus OX=10090 GN=Mrps27 PE=1 SV=2	0	112.62	44	18	42	18	1	415	116.35	18	0	1.059	1.144	1.152	1.066	0.08	0.19	0.2	0.09	0.209863	0.578094	0.999957	0.584162	0.795753	0.965076	0.999985	0.96579	2.24743e+06	2.38082e+06	2.57211e+06	2.74153e+06	High	High	High	High	639
High	Master Protein	Q9D0E1	Heterogeneous nuclear ribonucleoprotein M OS=Mus musculus OX=10090 GN=Hnrnpm PE=1 SV=3	0	348.252	64	50	147	50	1	729	364.89	50	0	1.059	0.993	1.093	1.165	0.08	-0.01	0.13	0.22	0.57778	0.628507	0.970875	0.529729	0.97261	0.97492	0.998629	0.95935	2.57659e+07	2.7293e+07	2.55931e+07	2.98225e+07	High	High	High	High	640
High	Master Protein	Q9JII6	Aldo-keto reductase family 1 member A1 OS=Mus musculus OX=10090 GN=Akr1a1 PE=1 SV=3	0	196.105	74	24	81	24	1	325	239.2	24	0	1.059	0.851	0.948	1.18	0.08	-0.23	-0.08	0.24	0.580465	0.0590818	0.199908	0.477545	0.974192	0.428601	0.803333	0.944206	1.03938e+07	1.10052e+07	8.84075e+06	1.04341e+07	High	High	High	High	641
High	Master Protein	Q99KR7	Peptidyl-prolyl cis-trans isomerase F, mitochondrial OS=Mus musculus OX=10090 GN=Ppif PE=1 SV=1	0	110.259	66	13	42	10	1	206	129.44	13	1	1.059	0.838	1.029	1.3	0.08	-0.26	0.04	0.38	0.580897	0.0431069	0.572789	0.183632	0.974192	0.354527	0.969841	0.740838	1.17591e+07	1.245e+07	9.85386e+06	1.28102e+07	High	High	High	High	642
High	Master Protein	P55292	Desmocollin-2 OS=Mus musculus OX=10090 GN=Dsc2 PE=1 SV=1	0	111.522	26	21	42	20	1	902	111.16	21	0	1.058	1.1	1.043	1.003	0.08	0.14	0.06	0	0.226933	0.861648	0.38675	0.960603	0.825416	0.994496	0.923864	0.999848	3.44758e+06	3.64861e+06	3.79379e+06	3.80652e+06	High	High	High	High	643
High	Master Protein	Q8BH59	Electrogenic aspartate/glutamate antiporter SLC25A12, mitochondrial OS=Mus musculus OX=10090 GN=Slc25a12 PE=1 SV=1	0	413.443	65	38	164	32	1	677	564.8	38	5	1.058	1.053	1.031	1.036	0.08	0.07	0.04	0.05	0.584492	0.963336	0.58693	0.901812	0.9748	0.99941	0.970956	0.995594	2.5308e+07	2.67801e+07	2.66537e+07	2.762e+07	High	High	High	High	644
High	Master Protein	Q99N94	39S ribosomal protein L9, mitochondrial OS=Mus musculus OX=10090 GN=Mrpl9 PE=1 SV=2	0	25.465	29	9	11	9	1	265	21.05	9	0	1.058	1.018	1.084	1.127	0.08	0.03	0.12	0.17	0.252508	0.436782	0.518722	0.291465	0.847425	0.925756	0.959851	0.861018	1.09143e+06	1.15492e+06	1.11074e+06	1.25146e+06	High	High	High	High	645
High	Master Protein	Q9DAW6	U4/U6 small nuclear ribonucleoprotein Prp4 OS=Mus musculus OX=10090 GN=Prpf4 PE=1 SV=1	0	73.432	33	13	19	13	1	521	50.67	13	0	1.058	1.017	1.107	1.151	0.08	0.02	0.15	0.2	0.247934	0.549038	0.632024	0.290187	0.842749	0.958738	0.981698	0.861018	721500	763017	733469	844296	High	High	High	High	646
High	Master Protein	P36552	Oxygen-dependent coproporphyrinogen-III oxidase, mitochondrial OS=Mus musculus OX=10090 GN=Cpox PE=1 SV=2	0	125.713	44	19	35	19	1	443	93.46	19	0	1.058	0.914	1.117	1.293	0.08	-0.13	0.16	0.37	0.221679	0.0373627	0.807167	0.0265118	0.81644	0.317802	0.990777	0.282453	2.61083e+06	2.76165e+06	2.38664e+06	3.08494e+06	High	High	High	High	647
High	Master Protein	Q9Z0S1	3'(2'),5'-bisphosphate nucleotidase 1 OS=Mus musculus OX=10090 GN=Bpnt1 PE=1 SV=2	0	163.873	76	17	76	17	1	308	251.43	17	0	1.057	1.317	1.17	0.939	0.08	0.4	0.23	-0.09	0.589041	0.0385471	0.573814	0.451623	0.975768	0.325025	0.969841	0.932217	1.76697e+07	1.86845e+07	2.32705e+07	2.18583e+07	High	High	High	High	648
High	Master Protein	Q3U3R4	Lipase maturation factor 1 OS=Mus musculus OX=10090 GN=Lmf1 PE=1 SV=1	0	20.43	10	5	6	5	1	574	16.87	5	0	1.057	1.158	1.061	0.968	0.08	0.21	0.09	-0.05	0.250685	0.620334	0.336346	0.709945	0.845814	0.97492	0.911286	0.970754	466544	492936	540219	522968	High	High	High	High	649
High	Master Protein	Q9CR57	60S ribosomal protein L14 OS=Mus musculus OX=10090 GN=Rpl14 PE=1 SV=3	0	70.174	53	14	32	14	1	217	89.36	14	0	1.057	1.261	1.173	0.983	0.08	0.34	0.23	-0.03	0.592922	0.0931788	0.557398	0.643643	0.975827	0.552185	0.965441	0.970324	1.21853e+07	1.28774e+07	1.53707e+07	1.51065e+07	High	High	High	High	650
High	Master Protein	Q91V16	Electron transfer flavoprotein regulatory factor 1 OS=Mus musculus OX=10090 GN=Etfrf1 PE=1 SV=1	0	11.632	28	3	5	3	1	86	10.59	3	0	1.057	1.08	1.029	1.008	0.08	0.11	0.04	0.01	0.255829	0.988021	0.251746	0.893527	0.851855	0.999773	0.858863	0.995594	642572	679307	693788	699177	High	High	High	High	651
High	Master Protein	P03893	NADH-ubiquinone oxidoreductase chain 2 OS=Mus musculus OX=10090 GN=mt-Nd2 PE=1 SV=2	0	35.172	19	5	24	5	1	345	52.46	5	0	1.057	1.003	0.989	1.042	0.08	0	-0.02	0.06	0.217016	0.302586	0.0828426	0.729923	0.808297	0.873013	0.549414	0.975648	2.01835e+06	2.13407e+06	2.02437e+06	2.10986e+06	High	High	High	High	652
High	Master Protein	Q8C7H1	Methylmalonic aciduria type A homolog, mitochondrial OS=Mus musculus OX=10090 GN=Mmaa PE=1 SV=1	0	85.387	40	15	27	15	1	415	60.96	15	0	1.057	1.066	1.053	1.045	0.08	0.09	0.08	0.06	0.324971	0.907473	0.516718	0.734348	0.895831	0.995494	0.959425	0.976869	4.99157e+06	5.27788e+06	5.32156e+06	5.56022e+06	High	High	High	High	653
High	Master Protein	Q8K1N1	Calcium-independent phospholipase A2-gamma OS=Mus musculus OX=10090 GN=Pnpla8 PE=1 SV=1	0	9.193	4	2	4	2	1	776	5.08	2	0	1.057	1.089	1.073	1.042	0.08	0.12	0.1	0.06	0.277764	0.851818	0.358652	0.736039	0.863992	0.993839	0.915503	0.977575	18284.5	19333	19905.4	20746.2	High	High	High	High	654
High	Master Protein	Q9Z2D6	Methyl-CpG-binding protein 2 OS=Mus musculus OX=10090 GN=Mecp2 PE=1 SV=1	0	72.577	39	14	24	14	1	484	46.63	14	0	1.057	1.053	1.058	1.062	0.08	0.07	0.08	0.09	0.234297	0.63648	0.394297	0.593224	0.831526	0.97492	0.931501	0.96579	2.53654e+06	2.68114e+06	2.67026e+06	2.83659e+06	High	High	High	High	655
High	Master Protein	P53395	Lipoamide acyltransferase component of branched-chain alpha-keto acid dehydrogenase complex, mitochondrial OS=Mus musculus OX=10090 GN=Dbt PE=1 SV=2	0	267.884	54	26	151	26	1	482	452.42	26	0	1.057	1.07	1.082	1.07	0.08	0.1	0.11	0.1	0.590541	0.852057	0.905516	0.935279	0.975827	0.993839	0.991669	0.997966	4.28575e+07	4.53083e+07	4.58427e+07	4.90458e+07	High	High	High	High	656
High	Master Protein	Q80TN4	DnaJ homolog subfamily C member 16 OS=Mus musculus OX=10090 GN=Dnajc16 PE=1 SV=2	0	27.231	11	6	6	6	1	772	13.51	6	0	1.057	1.065	1.092	1.083	0.08	0.09	0.13	0.12	0.224223	0.817397	0.492081	0.594759	0.819642	0.991263	0.957561	0.96579	443789	469125	472746	512120	High	High	High	High	657
High	Master Protein	Q9EP89	Serine beta-lactamase-like protein LACTB, mitochondrial OS=Mus musculus OX=10090 GN=Lactb PE=1 SV=1	0	70.29	26	18	25	18	1	551	58.05	18	0	1.057	0.981	1.045	1.126	0.08	-0.03	0.06	0.17	0.220742	0.192426	0.302801	0.267721	0.815135	0.755261	0.891086	0.842582	2.261e+06	2.38959e+06	2.21871e+06	2.49773e+06	High	High	High	High	658
High	Master Protein	Q6P1B1	Xaa-Pro aminopeptidase 1 OS=Mus musculus OX=10090 GN=Xpnpep1 PE=1 SV=1	0	46.792	23	13	16	13	1	623	36.24	13	0	1.057	0.945	1.066	1.193	0.08	-0.08	0.09	0.25	0.26553	0.167337	0.420896	0.17162	0.857005	0.723787	0.944621	0.722841	762994	806559	721190	860168	High	High	High	High	659
High	Master Protein	P17182	Alpha-enolase OS=Mus musculus OX=10090 GN=Eno1 PE=1 SV=3	0	408.592	77	36	187	36	1	434	628.25	36	0	1.057	0.974	1.118	1.213	0.08	-0.04	0.16	0.28	0.593287	0.509213	0.870111	0.376738	0.975827	0.945611	0.990777	0.907072	3.66536e+07	3.87333e+07	3.57057e+07	4.32988e+07	High	High	High	High	660
High	Master Protein	Q9D554	Splicing factor 3A subunit 3 OS=Mus musculus OX=10090 GN=Sf3a3 PE=1 SV=2	0	80.024	27	12	25	12	1	501	66.61	12	0	1.057	1.027	1.258	1.295	0.08	0.04	0.33	0.37	0.23633	0.457388	0.319115	0.0185041	0.834122	0.930214	0.905342	0.220448	1.78953e+06	1.89084e+06	1.83697e+06	2.37808e+06	High	High	High	High	661
High	Master Protein	Q8C5L7	RNA-binding protein 34 OS=Mus musculus OX=10090 GN=Rbm34 PE=1 SV=2	0.001	8.066	11	3	3	3	1	442	7.61	3	0	1.056	1.259	0.93	0.78	0.08	0.33	-0.1	-0.36	0.274244	0.405437	0.0425952	0.0709839	0.861233	0.915547	0.370795	0.497288	22869.1	24141.5	28791.8	22447.8	High	High	High	High	662
High	Master Protein	P20664	DNA primase small subunit OS=Mus musculus OX=10090 GN=Prim1 PE=1 SV=1	0.004	5.419	6	2	2	2	1	417	0	2	0	1.056	1.593	1.235	0.819	0.08	0.67	0.3	-0.29	0.35848	0.0346075	0.955662	0.303977	0.918957	0.298734	0.996516	0.870663	7736.05	8169.34	12322.1	10086.9	High	High	High	High	663
High	Master Protein	C0HKE5	Histone H2A type 1-G OS=Mus musculus OX=10090 GN=H2ac11 PE=1 SV=1	0	82.4	46	10	82	3	1	130	200.75	10	0	1.056	1.166	1.056	0.956	0.08	0.22	0.08	-0.06	0.598669	0.333148	0.738336	0.524013	0.977294	0.896637	0.986902	0.958135	1.69386e+07	1.78849e+07	1.97521e+07	1.88909e+07	High	High	High	High	664
High	Master Protein	Q8K2A7	Integrator complex subunit 10 OS=Mus musculus OX=10090 GN=Ints10 PE=1 SV=3	0.003	5.728	5	3	3	3	1	710	5.98	3	0	1.056	1.115	1.102	1.044	0.08	0.16	0.14	0.06	0.270598	0.832682	0.562384	0.802825	0.860694	0.991263	0.96751	0.986585	181001	191168	201826	210740	High	High	High	High	665
High	Master Protein	Q99P58	Ras-related protein Rab-27B OS=Mus musculus OX=10090 GN=Rab27b PE=1 SV=3	0	156.906	68	13	69	11	1	218	196.49	13	2	1.056	0.996	1.002	1.064	0.08	-0.01	0	0.09	0.595308	0.598173	0.376175	0.902251	0.975827	0.969703	0.91735	0.995594	8.10573e+06	8.56298e+06	8.06995e+06	8.58345e+06	High	High	High	High	666
High	Master Protein	Q9CXI0	2-methoxy-6-polyprenyl-1,4-benzoquinol methylase, mitochondrial OS=Mus musculus OX=10090 GN=Coq5 PE=1 SV=2	0	86.231	45	10	26	10	1	327	92.92	10	0	1.056	1.043	1.053	1.066	0.08	0.06	0.07	0.09	0.233698	0.584048	0.312606	0.558693	0.831526	0.967538	0.900457	0.965089	1.82259e+06	1.92476e+06	1.90158e+06	2.02624e+06	High	High	High	High	667
High	Master Protein	Q8K370	Acyl-CoA dehydrogenase family member 10 OS=Mus musculus OX=10090 GN=Acad10 PE=1 SV=1	0	141.965	28	28	39	28	1	1069	109.21	28	0	1.056	1.113	1.163	1.103	0.08	0.15	0.22	0.14	0.233037	0.859601	0.855504	0.395412	0.831227	0.993984	0.990777	0.920105	2.64559e+06	2.79279e+06	2.94464e+06	3.24848e+06	High	High	High	High	668
High	Master Protein	Q9CSN1	SNW domain-containing protein 1 OS=Mus musculus OX=10090 GN=Snw1 PE=1 SV=3	0	31.872	21	10	10	10	1	536	18.69	10	0	1.056	1.078	1.187	1.163	0.08	0.11	0.25	0.22	0.248494	0.955104	0.785678	0.208834	0.842749	0.998445	0.990777	0.773512	873141	922308	941619	1.09465e+06	High	High	High	High	669
High	Master Protein	Q8C3X2	Coiled-coil domain-containing protein 90B, mitochondrial OS=Mus musculus OX=10090 GN=Ccdc90b PE=1 SV=1	0	41.609	41	9	12	8	1	256	30.19	9	0	1.055	0.992	0.81	0.861	0.08	-0.01	-0.3	-0.22	0.303757	0.348092	0.00170937	0.239113	0.877483	0.896637	0.0338095	0.808586	164883	173904	163561	140840	High	High	High	High	670
High	Master Protein	Q8BZF8	Phosphoglucomutase-like protein 5 OS=Mus musculus OX=10090 GN=Pgm5 PE=1 SV=2	0	39.907	17	9	14	8	1	567	24.9	9	0	1.055	1.212	1.102	0.96	0.08	0.28	0.14	-0.06	0.27023	0.282204	0.598601	0.595868	0.860694	0.855246	0.970956	0.96579	560445	591113	679051	651667	High	High	High	High	671
High	Master Protein	Q68FH4	N-acetylgalactosamine kinase OS=Mus musculus OX=10090 GN=Galk2 PE=1 SV=1	0	17.16	14	7	8	7	1	458	16.92	7	0	1.055	1.187	1.085	0.965	0.08	0.25	0.12	-0.05	0.229621	0.456157	0.462403	0.666046	0.828074	0.930214	0.957031	0.970324	430006	453729	510327	492471	High	High	High	High	672
High	Master Protein	Q9CZP5	Mitochondrial chaperone BCS1 OS=Mus musculus OX=10090 GN=Bcs1l PE=1 SV=1	0	67.881	25	10	21	10	1	418	57.76	10	0	1.055	1.082	0.998	0.974	0.08	0.11	0	-0.04	0.270703	0.95188	0.116999	0.736373	0.860694	0.997665	0.649314	0.977575	1.38077e+06	1.45699e+06	1.4934e+06	1.45404e+06	High	High	High	High	673
High	Master Protein	P62488	DNA-directed RNA polymerase II subunit RPB7 OS=Mus musculus OX=10090 GN=Polr2g PE=1 SV=1	0	24.262	40	6	7	6	1	172	14.96	6	0	1.055	1.209	1.14	0.995	0.08	0.27	0.19	-0.01	0.257855	0.272039	0.88087	0.816744	0.853291	0.845984	0.990777	0.990603	569736	601345	689029	685811	High	High	High	High	674
High	Master Protein	Q9CQH3	NADH dehydrogenase [ubiquinone] 1 beta subcomplex subunit 5, mitochondrial OS=Mus musculus OX=10090 GN=Ndufb5 PE=1 SV=1	0	92.105	37	11	64	11	1	189	222.55	11	0	1.055	1.005	0.992	1.042	0.08	0.01	-0.01	0.06	0.603021	0.703179	0.377639	0.930847	0.980205	0.98508	0.91735	0.997966	1.62807e+07	1.71789e+07	1.63563e+07	1.70463e+07	High	High	High	High	675
High	Master Protein	Q8BU91	Solute carrier family 26 member 9 OS=Mus musculus OX=10090 GN=Slc26a9 PE=1 SV=1	0	74.541	13	11	33	11	1	790	86.05	11	0	1.055	0.983	1.01	1.084	0.08	-0.03	0.01	0.12	0.300627	0.24049	0.261962	0.47594	0.877483	0.818992	0.863956	0.944206	4.23151e+06	4.46339e+06	4.15795e+06	4.50699e+06	High	High	High	High	676
High	Master Protein	Q9DCJ1	Target of rapamycin complex subunit LST8 OS=Mus musculus OX=10090 GN=Mlst8 PE=1 SV=1	0	15.868	11	3	3	3	1	326	11.21	3	0	1.055	1.036	1.171	1.193	0.08	0.05	0.23	0.25	0.294007	0.606175	0.999493	0.188836	0.876704	0.97181	0.999985	0.746237	149102	157352	154415	184183	High	High	High	High	677
High	Master Protein	P09450	Transcription factor JunB OS=Mus musculus OX=10090 GN=Junb PE=1 SV=1	0	9.636	9	3	3	3	1	344	7.77	3	0	1.055	0.966	1.097	1.2	0.08	-0.05	0.13	0.26	0.246318	0.229587	0.550294	0.17054	0.842749	0.797945	0.964415	0.722841	468244	494191	452106	542338	High	High	High	High	678
High	Master Protein	Q9DCA5	Ribosome biogenesis protein BRX1 homolog OS=Mus musculus OX=10090 GN=Brix1 PE=1 SV=3	0	36.419	28	7	9	7	1	353	21.19	7	0	1.054	1.205	1.088	0.952	0.08	0.27	0.12	-0.07	0.231667	0.3486	0.464282	0.571762	0.831224	0.896637	0.957031	0.96579	404391	426074	487227	463767	High	High	High	High	679
High	Master Protein	Q9JJI6	GPI ethanolamine phosphate transferase 3 OS=Mus musculus OX=10090 GN=Pigo PE=1 SV=2	0	16.298	6	5	6	5	1	1093	16.66	5	0	1.054	1.124	1.02	0.957	0.08	0.17	0.03	-0.06	0.223905	0.752232	0.155142	0.607431	0.819642	0.98508	0.729842	0.96579	375365	395662	421805	403675	High	High	High	High	680
High	Master Protein	Q99N84	28S ribosomal protein S18b, mitochondrial OS=Mus musculus OX=10090 GN=Mrps18b PE=1 SV=1	0	32.928	30	6	12	6	1	254	32.23	6	0	1.054	1.125	1.047	0.981	0.08	0.17	0.07	-0.03	0.267304	0.752328	0.288035	0.749791	0.858935	0.98508	0.881503	0.979205	573771	604534	645527	633176	High	High	High	High	681
High	Master Protein	Q8BMG7	Rab3 GTPase-activating protein non-catalytic subunit OS=Mus musculus OX=10090 GN=Rab3gap2 PE=1 SV=2	0	72.25	15	18	19	18	1	1366	38.82	18	0	1.054	1.274	1.183	0.978	0.08	0.35	0.24	-0.03	0.273256	0.067246	0.767005	0.740538	0.860803	0.46168	0.988083	0.977575	1.19301e+06	1.25727e+06	1.51994e+06	1.48676e+06	High	High	High	High	682
High	Master Protein	Q9JIW9	Ras-related protein Ral-B OS=Mus musculus OX=10090 GN=Ralb PE=1 SV=1	0	74.96	35	10	27	7	1	206	83.42	10	3	1.054	1.01	0.971	1.014	0.08	0.01	-0.04	0.02	0.304406	0.463903	0.119738	0.91291	0.877483	0.931163	0.655791	0.997285	4.65099e+06	4.90187e+06	4.6962e+06	4.75987e+06	High	High	High	High	683
High	Master Protein	Q8BK67	Protein RCC2 OS=Mus musculus OX=10090 GN=Rcc2 PE=1 SV=1	0.001	8.019	5	2	3	2	1	520	8.08	2	0	1.054	1.058	1.077	1.073	0.08	0.08	0.11	0.1	0.293904	0.725962	0.311852	0.654021	0.876704	0.98508	0.900457	0.970324	40185	42354.9	42530	45626.5	High	High	High	High	684
High	Master Protein	O55128	Histone deacetylase complex subunit SAP18 OS=Mus musculus OX=10090 GN=Sap18 PE=1 SV=1	0	48.463	39	9	21	9	1	153	39.37	9	0	1.054	1.087	1.105	1.071	0.08	0.12	0.14	0.1	0.247784	0.921807	0.655464	0.538199	0.842749	0.995494	0.985087	0.964184	2.11165e+06	2.2263e+06	2.29541e+06	2.45916e+06	High	High	High	High	685
High	Master Protein	Q91XD7	Protein disulfide isomerase Creld1 OS=Mus musculus OX=10090 GN=Creld1 PE=1 SV=1	0.002	6.362	6	2	3	2	1	420	4.85	2	0	1.054	1.189	1.248	1.106	0.08	0.25	0.32	0.15	0.320719	0.548201	0.664557	0.442647	0.894948	0.958738	0.985957	0.930052	61096.9	64370.9	72660	80351.2	High	High	High	High	686
High	Master Protein	Q9CQW5	Galectin-2 OS=Mus musculus OX=10090 GN=Lgals2 PE=1 SV=1	0	126.384	91	13	87	13	1	130	288.04	13	0	1.054	0.906	0.98	1.141	0.08	-0.14	-0.03	0.19	0.610151	0.186617	0.321478	0.622861	0.981536	0.743656	0.905342	0.96579	4.43728e+07	4.67701e+07	4.01826e+07	4.58352e+07	High	High	High	High	687
High	Master Protein	Q8BHY8	Sorting nexin-14 OS=Mus musculus OX=10090 GN=Snx14 PE=1 SV=2	0	19.357	7	7	9	7	1	964	12.27	7	0	1.053	1.139	1.016	0.939	0.07	0.19	0.02	-0.09	0.307381	0.75021	0.224102	0.634298	0.879507	0.98508	0.842373	0.970324	111891	117805	127468	119694	High	High	High	High	688
High	Master Protein	Q9CWX2	Complex I intermediate-associated protein 30, mitochondrial OS=Mus musculus OX=10090 GN=Ndufaf1 PE=1 SV=2	0	62.826	48	16	28	16	1	328	67.29	16	0	1.053	1.151	1.07	0.979	0.08	0.2	0.1	-0.03	0.243881	0.560686	0.494934	0.862091	0.842749	0.959433	0.957561	0.995594	2.63409e+06	2.77484e+06	3.03179e+06	2.96779e+06	High	High	High	High	689
High	Master Protein	Q9ESW4	Acylglycerol kinase, mitochondrial OS=Mus musculus OX=10090 GN=Agk PE=1 SV=1	0	107.384	43	17	39	17	1	421	115.4	17	0	1.053	1.087	1.032	1	0.07	0.12	0.05	0	0.307616	0.943585	0.362757	0.999563	0.879507	0.995981	0.916348	0.999848	4.43197e+06	4.66672e+06	4.81594e+06	4.81465e+06	High	High	High	High	690
High	Master Protein	Q7TSH6	SR-related and CTD-associated factor 4 OS=Mus musculus OX=10090 GN=Scaf4 PE=1 SV=1	0	17.012	4	5	6	5	1	1183	13.59	5	0	1.053	1.166	1.11	1.003	0.07	0.22	0.15	0	0.322588	0.675168	0.522525	0.984932	0.895547	0.979653	0.960627	0.999848	60455.2	63675.2	70465.9	70690.6	High	High	High	High	691
High	Master Protein	Q8JZQ2	AFG3-like protein 2 OS=Mus musculus OX=10090 GN=Afg3l2 PE=1 SV=1	0	291.969	53	47	117	42	1	802	315.63	47	4	1.053	1.082	1.034	1.007	0.07	0.11	0.05	0.01	0.617885	0.773	0.603775	0.756626	0.982438	0.987205	0.971853	0.980157	1.22578e+07	1.29049e+07	1.32601e+07	1.33466e+07	High	High	High	High	692
High	Master Protein	Q91VT4	3-oxoacyl-[acyl-carrier-protein] reductase OS=Mus musculus OX=10090 GN=Cbr4 PE=1 SV=2	0	105.548	69	15	31	15	1	236	93.24	15	0	1.053	1.11	1.087	1.031	0.07	0.15	0.12	0.04	0.313497	0.757546	0.705605	0.809585	0.887467	0.986474	0.986902	0.987529	4.32868e+06	4.55851e+06	4.80506e+06	4.95471e+06	High	High	High	High	693
High	Master Protein	P62880	Guanine nucleotide-binding protein G(I)/G(S)/G(T) subunit beta-2 OS=Mus musculus OX=10090 GN=Gnb2 PE=1 SV=3	0	158.677	56	13	54	8	1	340	195.35	13	5	1.053	1.046	1.048	1.054	0.07	0.07	0.07	0.08	0.524221	0.836642	0.525664	0.809426	0.956358	0.991263	0.960627	0.987529	6.39336e+06	6.73061e+06	6.69036e+06	7.05142e+06	High	High	High	High	694
High	Master Protein	Q5SYD0	Unconventional myosin-Id OS=Mus musculus OX=10090 GN=Myo1d PE=1 SV=1	0	448.621	58	60	188	59	1	1006	563.94	60	1	1.053	1.1	1.12	1.073	0.08	0.14	0.16	0.1	0.613702	0.662956	0.857967	0.920803	0.982351	0.97492	0.990777	0.997966	2.26485e+07	2.38593e+07	2.49028e+07	2.67186e+07	High	High	High	High	695
High	Master Protein	Q8R404	MICOS complex subunit MIC13 OS=Mus musculus OX=10090 GN=Micos13 PE=1 SV=1	0	141.674	81	8	43	8	1	119	144.43	8	0	1.052	1.033	0.957	0.975	0.07	0.05	-0.06	-0.04	0.623844	0.897089	0.231653	0.607038	0.984024	0.995494	0.845195	0.96579	1.01696e+07	1.06969e+07	1.05048e+07	1.02414e+07	High	High	High	High	696
High	Master Protein	Q68FL4	Putative adenosylhomocysteinase 3 OS=Mus musculus OX=10090 GN=Ahcyl2 PE=1 SV=1	0	100.013	34	20	34	6	1	613	82.02	20	13	1.052	1.101	1.02	0.974	0.07	0.14	0.03	-0.04	0.420206	0.83006	0.309284	0.805113	0.93565	0.991263	0.897449	0.986585	5.57748e+06	5.86549e+06	6.14209e+06	5.98021e+06	High	High	High	High	697
High	Master Protein	Q9Z1Q2	Phosphatidylserine lipase ABHD16A OS=Mus musculus OX=10090 GN=Abhd16a PE=1 SV=3	0	96.458	40	22	29	22	1	558	77.19	22	0	1.052	1.146	1.082	0.993	0.07	0.2	0.11	-0.01	0.257539	0.575133	0.596192	0.953309	0.853291	0.965076	0.970956	0.999848	2.8101e+06	2.95516e+06	3.22079e+06	3.19769e+06	High	High	High	High	698
High	Master Protein	Q3TPE9	Ankyrin repeat and MYND domain-containing protein 2 OS=Mus musculus OX=10090 GN=Ankmy2 PE=1 SV=1	0	38.509	18	7	10	7	1	440	23.15	7	0	1.052	1.165	1.131	1.021	0.07	0.22	0.18	0.03	0.288774	0.413661	0.848721	0.869672	0.875812	0.918566	0.990777	0.995594	1.33898e+06	1.40858e+06	1.56044e+06	1.59302e+06	High	High	High	High	699
High	Master Protein	Q8CI11	Guanine nucleotide-binding protein-like 3 OS=Mus musculus OX=10090 GN=Gnl3 PE=1 SV=2	0	25.976	18	7	7	7	1	538	15.04	7	0	1.052	1.232	1.21	1.033	0.07	0.3	0.28	0.05	0.220512	0.239511	0.762532	0.90436	0.814865	0.817287	0.988083	0.995594	286782	301638	353392	365064	High	High	High	High	700
High	Master Protein	P40630	Transcription factor A, mitochondrial OS=Mus musculus OX=10090 GN=Tfam PE=1 SV=2	0	64.186	51	15	27	14	1	243	64.79	15	0	1.052	0.972	0.961	1.041	0.07	-0.04	-0.06	0.06	0.479543	0.337029	0.121681	0.801023	0.950422	0.896637	0.660669	0.986585	5.96819e+06	6.28015e+06	5.80282e+06	6.03805e+06	High	High	High	High	701
High	Master Protein	Q8VCX5	Calcium uptake protein 1, mitochondrial OS=Mus musculus OX=10090 GN=Micu1 PE=1 SV=1	0	103.907	44	21	39	21	1	477	102.99	21	0	1.052	1.065	1.091	1.078	0.07	0.09	0.13	0.11	0.232359	0.810855	0.696704	0.508825	0.831227	0.991263	0.986902	0.954916	3.29058e+06	3.46234e+06	3.50311e+06	3.77624e+06	High	High	High	High	702
High	Master Protein	Q9DCV4	Regulator of microtubule dynamics protein 1 OS=Mus musculus OX=10090 GN=Rmdn1 PE=1 SV=2	0	81.455	47	14	32	13	1	305	86.2	14	0	1.052	1.08	1.22	1.188	0.07	0.11	0.29	0.25	0.247779	0.854407	0.500232	0.132801	0.842749	0.993984	0.957561	0.659693	2.62299e+06	2.75879e+06	2.83347e+06	3.3659e+06	High	High	High	High	703
High	Master Protein	Q99K48	Non-POU domain-containing octamer-binding protein OS=Mus musculus OX=10090 GN=Nono PE=1 SV=3	0	177.909	53	28	100	26	1	473	230.9	28	1	1.052	1.065	1.215	1.201	0.07	0.09	0.28	0.26	0.62014	0.880683	0.369698	0.412308	0.982706	0.995494	0.91735	0.920105	1.29486e+07	1.36276e+07	1.37949e+07	1.65621e+07	High	High	High	High	704
High	Master Protein	P49135	General transcription and DNA repair factor IIH helicase subunit XPB OS=Mus musculus OX=10090 GN=Ercc3 PE=2 SV=1	0.003	5.51	2	2	2	2	1	783	4.4	2	0	1.052	0.94	1.123	1.258	0.07	-0.09	0.17	0.33	0.413464	0.297319	0.636176	0.200685	0.934856	0.86911	0.982252	0.759538	5340.53	5620.29	5017.88	6312.03	High	High	High	High	705
High	Master Protein	Q9D7J9	Enoyl-CoA hydratase domain-containing protein 3, mitochondrial OS=Mus musculus OX=10090 GN=Echdc3 PE=1 SV=1	0	29.914	38	8	9	8	1	300	17.58	8	0	1.052	0.923	1.13	1.288	0.07	-0.12	0.18	0.37	0.26715	0.0882234	0.821884	0.0293884	0.858935	0.535787	0.990777	0.297642	867957	913510	801287	1.03224e+06	High	High	High	High	706
High	Master Protein	O35737	Heterogeneous nuclear ribonucleoprotein H OS=Mus musculus OX=10090 GN=Hnrnph1 PE=1 SV=3	0	98.325	29	10	29	3	1	449	104.42	10	4	1.052	1.041	1.355	1.369	0.07	0.06	0.44	0.45	0.280127	0.571675	0.0687091	0.00510819	0.867068	0.965076	0.496222	0.0866308	1.68997e+06	1.77843e+06	1.75956e+06	2.40958e+06	High	High	High	High	707
High	Master Protein	Q9CQF0	39S ribosomal protein L11, mitochondrial OS=Mus musculus OX=10090 GN=Mrpl11 PE=1 SV=1	0	59.743	49	10	17	10	1	192	45.34	10	0	1.051	1.297	1.218	0.986	0.07	0.38	0.28	-0.02	0.24518	0.0455444	0.536653	0.88135	0.842749	0.365991	0.964415	0.995594	1.90599e+06	2.0024e+06	2.4723e+06	2.43792e+06	High	High	High	High	708
High	Master Protein	Q9ER39	Torsin-1A OS=Mus musculus OX=10090 GN=Tor1a PE=1 SV=1	0	10.61	6	2	3	2	1	333	4.62	2	0	1.051	1.231	1.236	1.055	0.07	0.3	0.31	0.08	0.300009	0.425422	0.869744	0.698604	0.877483	0.921315	0.990777	0.970324	42628.2	44806.8	52475.7	55381.5	High	High	High	High	709
High	Master Protein	Q8BGV0	Probable asparagine--tRNA ligase, mitochondrial OS=Mus musculus OX=10090 GN=Nars2 PE=1 SV=1	0.002	6.187	7	4	4	4	1	477	4.32	4	0	1.051	0.975	1.009	1.088	0.07	-0.04	0.01	0.12	0.336313	0.280934	0.143657	0.4981	0.904716	0.854411	0.711627	0.953034	66234.4	69610.1	64561.6	70269.6	High	High	High	High	710
High	Master Protein	Q9D1R1	Complex I assembly factor TMEM126B, mitochondrial OS=Mus musculus OX=10090 GN=Tmem126b PE=1 SV=1	0	14.068	21	4	5	4	1	230	13.22	4	0	1.051	1.03	1.118	1.142	0.07	0.04	0.16	0.19	0.316008	0.576921	0.679142	0.323462	0.889208	0.965076	0.986902	0.880835	155409	163367	160023	182701	High	High	High	High	711
High	Master Protein	P47791	Glutathione reductase, mitochondrial OS=Mus musculus OX=10090 GN=Gsr PE=1 SV=3	0	79.256	28	13	25	13	1	500	77.52	13	0	1.051	0.974	1.114	1.201	0.07	-0.04	0.16	0.26	0.237697	0.161987	0.862525	0.101198	0.834877	0.716909	0.990777	0.58041	3.18258e+06	3.34371e+06	3.10052e+06	3.72404e+06	High	High	High	High	712
High	Master Protein	Q07456	Protein AMBP OS=Mus musculus OX=10090 GN=Ambp PE=1 SV=2	0.001	8.811	5	2	3	2	1	349	3.82	2	0	1.051	1.168	1.361	1.224	0.07	0.22	0.44	0.29	0.26653	0.502316	0.149104	0.116719	0.858329	0.944906	0.720733	0.622896	266651	280175	311455	381219	High	High	High	High	713
High	Master Protein	P14733	Lamin-B1 OS=Mus musculus OX=10090 GN=Lmnb1 PE=1 SV=3	0	437.845	70	55	203	47	1	588	558.01	55	5	1.05	1.121	0.931	0.871	0.07	0.17	-0.1	-0.2	0.635729	0.539661	0.148355	0.217398	0.984024	0.957519	0.719504	0.783404	3.21453e+07	3.37522e+07	3.60448e+07	3.14099e+07	High	High	High	High	714
High	Master Protein	Q91YD9	Actin nucleation-promoting factor WASL OS=Mus musculus OX=10090 GN=Wasl PE=1 SV=1	0	15.68	11	4	4	4	1	501	11.85	4	0	1.05	1.22	1.029	0.886	0.07	0.29	0.04	-0.17	0.324501	0.572175	0.258766	0.454277	0.895831	0.965076	0.863956	0.934415	16848.2	17688	20551.2	18203.8	High	High	High	High	715
High	Master Protein	Q9DAX2	Phospholipid phosphatase 2 OS=Mus musculus OX=10090 GN=Plpp2 PE=1 SV=1	0	11.641	16	4	5	4	1	276	12.31	4	0	1.05	1.026	0.943	0.964	0.07	0.04	-0.09	-0.05	0.295274	0.53175	0.0318093	0.674354	0.876704	0.953971	0.309834	0.970324	557561	585299	572315	551661	High	High	High	High	716
High	Master Protein	P53702	Holocytochrome c-type synthase OS=Mus musculus OX=10090 GN=Hccs PE=1 SV=2	0	57.282	39	9	17	9	1	272	54.75	9	0	1.05	1.043	0.986	0.993	0.07	0.06	-0.02	-0.01	0.30341	0.605196	0.0948311	0.911687	0.877483	0.97181	0.589778	0.997054	1.37057e+06	1.43843e+06	1.4289e+06	1.41862e+06	High	High	High	High	717
High	Master Protein	Q8VCH7	Retinol dehydrogenase 10 OS=Mus musculus OX=10090 GN=Rdh10 PE=1 SV=2	0	28.543	23	6	8	6	1	341	23.24	6	0	1.05	1.03	0.992	1.011	0.07	0.04	-0.01	0.02	0.299372	0.621073	0.127657	0.902784	0.877483	0.97492	0.672397	0.995594	925206	971430	953151	963908	High	High	High	High	718
High	Master Protein	Q5U458	DnaJ homolog subfamily C member 11 OS=Mus musculus OX=10090 GN=Dnajc11 PE=1 SV=2	0	133.522	39	24	53	24	1	559	133.35	24	0	1.05	1.088	1.05	1.013	0.07	0.12	0.07	0.02	0.486585	0.927238	0.499125	0.990917	0.950422	0.995494	0.957561	0.999848	5.89503e+06	6.18752e+06	6.41115e+06	6.49453e+06	High	High	High	High	719
High	Master Protein	O35129	Prohibitin-2 OS=Mus musculus OX=10090 GN=Phb2 PE=1 SV=1	0	187.328	83	25	119	25	1	299	345.68	25	0	1.05	1.068	1.049	1.032	0.07	0.09	0.07	0.05	0.633518	0.865899	0.695524	0.883075	0.984024	0.995494	0.986902	0.995594	5.46417e+07	5.7392e+07	5.83339e+07	6.02255e+07	High	High	High	High	720
High	Master Protein	P97434	Myosin phosphatase Rho-interacting protein OS=Mus musculus OX=10090 GN=Mprip PE=1 SV=2	0	111.255	30	24	33	23	1	1024	73.45	24	0	1.05	1.177	1.168	1.042	0.07	0.23	0.22	0.06	0.287215	0.369733	0.872441	0.70914	0.875812	0.902677	0.990777	0.970754	1.50876e+06	1.58442e+06	1.7756e+06	1.85001e+06	High	High	High	High	721
High	Master Protein	Q9D8Y1	Transmembrane protein 126A OS=Mus musculus OX=10090 GN=Tmem126a PE=1 SV=1	0	16.948	20	4	15	4	1	196	27.04	4	0	1.05	1.131	1.14	1.058	0.07	0.18	0.19	0.08	0.279651	0.676917	0.872913	0.786118	0.866601	0.98088	0.990777	0.986585	622527	653669	704106	745197	High	High	High	High	722
High	Master Protein	Q8BVG4	Dipeptidyl peptidase 9 OS=Mus musculus OX=10090 GN=Dpp9 PE=1 SV=2	0	14.247	5	4	4	3	1	862	8.08	4	1	1.05	1.136	1.161	1.073	0.07	0.18	0.21	0.1	0.339542	0.82423	0.823365	0.590264	0.908549	0.991263	0.990777	0.96579	65888	69191.4	74865.3	80310.2	High	High	High	High	723
High	Master Protein	P46656	Adrenodoxin, mitochondrial OS=Mus musculus OX=10090 GN=Fdx1 PE=1 SV=1	0	9.487	19	4	7	4	1	188	15.69	4	0	1.05	1.028	1.083	1.107	0.07	0.04	0.11	0.15	0.265872	0.542118	0.482432	0.483388	0.857133	0.957519	0.957561	0.947075	486470	510880	499883	553267	High	High	High	High	724
High	Master Protein	P26645	Myristoylated alanine-rich C-kinase substrate OS=Mus musculus OX=10090 GN=Marcks PE=1 SV=2	0	62.816	23	7	14	7	1	309	34.19	7	0	1.05	0.948	1.126	1.247	0.07	-0.08	0.17	0.32	0.288808	0.192515	0.766256	0.0802651	0.875812	0.755261	0.988083	0.527866	700733	735919	664446	828504	High	High	High	High	725
High	Master Protein	P57016	Ladinin-1 OS=Mus musculus OX=10090 GN=Lad1 PE=1 SV=1	0	25.343	16	9	9	9	1	528	16.11	9	0	1.05	0.94	1.143	1.276	0.07	-0.09	0.19	0.35	0.302441	0.117343	0.92189	0.027032	0.877483	0.620637	0.992004	0.283753	999107	1.04869e+06	939063	1.1984e+06	High	High	High	High	726
High	Master Protein	P56213	FAD-linked sulfhydryl oxidase ALR OS=Mus musculus OX=10090 GN=Gfer PE=1 SV=2	0	14.233	22	3	4	3	1	198	9.77	3	0	1.05	1.003	1.297	1.357	0.07	0	0.37	0.44	0.319355	0.41476	0.427405	0.0133132	0.894188	0.918566	0.948267	0.179682	92199	96836.1	92500.6	125558	High	High	High	High	727
High	Master Protein	P62309	Small nuclear ribonucleoprotein G OS=Mus musculus OX=10090 GN=Snrpg PE=1 SV=1	0	23.586	28	4	9	4	1	76	19.52	4	0	1.049	1.382	1.22	0.926	0.07	0.47	0.29	-0.11	0.259684	0.0161351	0.59106	0.415804	0.853291	0.180752	0.970956	0.920105	524420	549873	724776	670782	High	High	High	High	728
High	Master Protein	Q64133	Amine oxidase [flavin-containing] A OS=Mus musculus OX=10090 GN=Maoa PE=1 SV=3	0	84.306	33	19	39	16	1	526	120.48	19	0	1.049	1.497	1.345	0.943	0.07	0.58	0.43	-0.08	0.29449	0.000118981	0.0880042	0.590806	0.876704	0.00302285	0.566089	0.96579	1.69495e+06	1.77865e+06	2.53701e+06	2.39302e+06	High	High	High	High	729
High	Master Protein	Q9ERI6	Retinol dehydrogenase 14 OS=Mus musculus OX=10090 GN=Rdh14 PE=1 SV=1	0	78.808	44	11	21	11	1	334	63.62	11	0	1.049	1.072	0.997	0.976	0.07	0.1	0	-0.04	0.299224	0.823713	0.0844381	0.810754	0.877483	0.991263	0.551478	0.988074	1.60511e+06	1.68317e+06	1.71988e+06	1.67801e+06	High	High	High	High	730
High	Master Protein	Q61072	Disintegrin and metalloproteinase domain-containing protein 9 OS=Mus musculus OX=10090 GN=Adam9 PE=1 SV=2	0	16.142	7	4	4	4	1	845	7.8	4	0	1.049	1.077	1.033	1.006	0.07	0.11	0.05	0.01	0.309685	0.827766	0.188838	0.990471	0.881611	0.991263	0.78632	0.999848	36933.2	38743.2	39772.8	40027.2	High	High	High	High	731
High	Master Protein	Q8CAQ8	MICOS complex subunit Mic60 OS=Mus musculus OX=10090 GN=Immt PE=1 SV=1	0	774.044	82	69	450	69	1	757	1505.98	69	0	1.049	1.034	1.014	1.029	0.07	0.05	0.02	0.04	0.642855	0.903929	0.490173	0.865771	0.984024	0.995494	0.957561	0.995594	1.13737e+08	1.19296e+08	1.17599e+08	1.20996e+08	High	High	High	High	732
High	Master Protein	Q9JHI7	Exosome complex component RRP45 OS=Mus musculus OX=10090 GN=Exosc9 PE=1 SV=1	0	19.726	8	4	6	4	1	438	14.35	4	0	1.049	1.154	1.148	1.044	0.07	0.21	0.2	0.06	0.291764	0.556426	0.873689	0.846005	0.876704	0.958912	0.990777	0.994434	216942	227600	250295	261238	High	High	High	High	733
High	Master Protein	P61327	Protein mago nashi homolog OS=Mus musculus OX=10090 GN=Magoh PE=2 SV=1	0	45.648	61	12	28	12	1	146	54.32	12	0	1.049	1.161	1.171	1.058	0.07	0.21	0.23	0.08	0.263651	0.488613	0.819617	0.615877	0.854774	0.942557	0.990777	0.96579	2.50696e+06	2.63017e+06	2.90945e+06	3.07915e+06	High	High	High	High	734
High	Master Protein	Q8BXC6	COMM domain-containing protein 2 OS=Mus musculus OX=10090 GN=Commd2 PE=1 SV=1	0.006	4.826	8	2	3	2	1	199	7.8	2	0	1.049	1.063	1.076	1.061	0.07	0.09	0.11	0.09	0.288976	0.83001	0.410824	0.726097	0.875812	0.991263	0.9409	0.975648	231640	242915	246320	261380	High	High	High	High	735
High	Master Protein	Q8BHS3	Pre-mRNA-splicing factor RBM22 OS=Mus musculus OX=10090 GN=Rbm22 PE=1 SV=1	0	39.511	22	8	11	8	1	420	24.23	8	0	1.049	1.114	1.178	1.109	0.07	0.16	0.24	0.15	0.284359	0.674184	0.852291	0.436559	0.873099	0.978969	0.990777	0.928587	855552	897232	952880	1.05692e+06	High	High	High	High	736
High	Master Protein	Q6NV83	U2 snRNP-associated SURP motif-containing protein OS=Mus musculus OX=10090 GN=U2surp PE=1 SV=3	0	61.808	15	16	18	16	1	1029	33.59	16	0	1.049	1.168	1.237	1.11	0.07	0.22	0.31	0.15	0.295903	0.42074	0.427922	0.378263	0.876704	0.918636	0.94831	0.907828	1.2459e+06	1.30665e+06	1.45552e+06	1.61623e+06	High	High	High	High	737
High	Master Protein	Q8R146	Acylamino-acid-releasing enzyme OS=Mus musculus OX=10090 GN=Apeh PE=1 SV=3	0	28.413	11	7	7	7	1	732	15.39	7	0	1.049	1.038	1.26	1.274	0.07	0.05	0.33	0.35	0.295833	0.675933	0.398698	0.0659392	0.876704	0.980144	0.932595	0.480662	649496	681070	673920	858264	High	High	High	High	738
High	Master Protein	Q8CH18	Cell division cycle and apoptosis regulator protein 1 OS=Mus musculus OX=10090 GN=Ccar1 PE=1 SV=1	0	38.378	8	10	12	10	1	1146	22.26	10	0	1.049	1.027	1.252	1.279	0.07	0.04	0.32	0.36	0.298578	0.536826	0.447866	0.078421	0.877483	0.957519	0.955524	0.522992	589086	618018	604786	773573	High	High	High	High	739
High	Master Protein	Q3TEA8	Heterochromatin protein 1-binding protein 3 OS=Mus musculus OX=10090 GN=Hp1bp3 PE=1 SV=1	0	196.471	45	34	74	34	1	554	186.45	34	0	1.048	1.048	0.918	0.918	0.07	0.07	-0.12	-0.12	0.651677	0.997799	0.117985	0.366826	0.984024	0.999773	0.650931	0.89921	1.48275e+07	1.5532e+07	1.55415e+07	1.42612e+07	High	High	High	High	740
High	Master Protein	P83741	Serine/threonine-protein kinase WNK1 OS=Mus musculus OX=10090 GN=Wnk1 PE=1 SV=2	0.003	6.081	1	3	3	3	1	2377	1.84	3	0	1.048	1.245	1.126	0.948	0.07	0.32	0.17	-0.08	0.347013	0.344196	0.636689	0.680452	0.914521	0.896637	0.982252	0.970324	63975.9	67039.4	79667.5	75515	High	High	High	High	741
High	Master Protein	Q61164	Transcriptional repressor CTCF OS=Mus musculus OX=10090 GN=Ctcf PE=1 SV=2	0	44.528	17	12	14	12	1	736	33.72	12	0	1.048	1.079	0.978	0.95	0.07	0.11	-0.03	-0.07	0.303407	0.999282	0.0847636	0.487499	0.877483	0.999773	0.552085	0.949643	786665	824064	848423	806125	High	High	High	High	742
High	Master Protein	Q8VE99	Coiled-coil domain-containing protein 115 OS=Mus musculus OX=10090 GN=Ccdc115 PE=1 SV=1	0	9.377	17	2	2	2	1	180	5.31	2	0	1.048	1.12	1.017	0.952	0.07	0.16	0.02	-0.07	0.328231	0.975014	0.147998	0.69613	0.895831	0.999773	0.71837	0.970324	33191.4	34773.5	37165.2	35371.9	High	High	High	High	743
High	Master Protein	Q6DID7	Protein wntless homolog OS=Mus musculus OX=10090 GN=Wls PE=1 SV=1	0	10.763	8	4	4	4	1	541	9.76	4	0	1.048	1.215	1.122	0.967	0.07	0.28	0.17	-0.05	0.279679	0.343466	0.74378	0.689716	0.866601	0.896637	0.986902	0.970324	475967	498578	578125	559162	High	High	High	High	744
High	Master Protein	Q7TPV4	Myb-binding protein 1A OS=Mus musculus OX=10090 GN=Mybbp1a PE=1 SV=2	0	364.714	45	55	118	55	1	1344	362.33	55	0	1.048	1.259	1.189	0.99	0.07	0.33	0.25	-0.01	0.649227	0.0971046	0.481435	0.676554	0.984024	0.564945	0.957561	0.970324	9.60307e+06	1.0063e+07	1.20869e+07	1.19638e+07	High	High	High	High	745
High	Master Protein	Q922P9	Cytokine-like nuclear factor N-PAC OS=Mus musculus OX=10090 GN=Glyr1 PE=1 SV=1	0	71.712	29	14	19	14	1	546	46.35	14	0	1.048	1.11	1.058	0.999	0.07	0.15	0.08	0	0.300741	0.840147	0.331648	0.984207	0.877483	0.991632	0.910819	0.999848	1.50385e+06	1.57633e+06	1.66942e+06	1.66798e+06	High	High	High	High	746
High	Master Protein	A2APY7	Arginine-hydroxylase NDUFAF5, mitochondrial OS=Mus musculus OX=10090 GN=Ndufaf5 PE=1 SV=1	0	23.513	20	6	6	6	1	343	17.72	6	0	1.048	1.034	1.122	1.137	0.07	0.05	0.17	0.18	0.232929	0.651377	0.644728	0.343816	0.831227	0.97492	0.983219	0.888764	316673	331806	327486	372193	High	High	High	High	747
High	Master Protein	Q9CQN7	39S ribosomal protein L41, mitochondrial OS=Mus musculus OX=10090 GN=Mrpl41 PE=1 SV=1	0	31.66	48	6	12	6	1	135	27.84	6	0	1.048	0.997	1.091	1.147	0.07	0	0.13	0.2	0.29327	0.393731	0.550841	0.248706	0.876704	0.909302	0.964415	0.821284	818874	858205	816157	936333	High	High	High	High	748
High	Master Protein	Q91V36	Nuclear receptor-binding protein 2 OS=Mus musculus OX=10090 GN=Nrbp2 PE=1 SV=2	0	10.167	7	3	3	3	1	499	3.34	3	0	1.047	1.452	0.832	0.6	0.07	0.54	-0.27	-0.74	0.330721	0.0832457	0.0161017	0.00129779	0.898597	0.518311	0.190802	0.0291477	16359.6	17132.6	23751.9	14255.5	High	High	High	High	749
High	Master Protein	Q8BGF9	Solute carrier family 25 member 44 OS=Mus musculus OX=10090 GN=Slc25a44 PE=1 SV=1	0.009	4.286	6	2	2	2	1	314	2.08	2	0	1.047	1.636	1.254	0.802	0.07	0.71	0.33	-0.32	0.373682	0.000688209	0.599759	0.0913265	0.922781	0.0143512	0.970956	0.562506	78550	82207.3	128490	103090	High	High	High	High	750
Medium	Master Protein	Q9CPW5	Translocon-associated protein subunit beta OS=Mus musculus OX=10090 GN=Ssr2 PE=1 SV=1	0.025	2.761	8	2	3	2	1	183	3.98	2	0	1.047	1.106	0.888	0.841	0.07	0.15	-0.17	-0.25	0.294808	0.732561	0.00777101	0.0662137	0.876704	0.98508	0.112409	0.481457	858747	899095	949798	798447	High	High	High	High	751
High	Master Protein	Q8BVU0	DISP complex protein LRCH3 OS=Mus musculus OX=10090 GN=Lrch3 PE=1 SV=3	0.003	5.911	3	2	2	2	1	778	2.32	2	0	1.047	0.975	0.9	0.967	0.07	-0.04	-0.15	-0.05	0.486365	0.44073	0.12295	0.983549	0.950422	0.926837	0.662608	0.999848	3447.72	3610.34	3362.62	3251.1	High	High	High	High	752
High	Master Protein	E9Q5C9	Nucleolar and coiled-body phosphoprotein 1 OS=Mus musculus OX=10090 GN=Nolc1 PE=1 SV=1	0	101.392	31	24	33	24	1	702	70.14	24	0	1.047	1.071	0.999	0.976	0.07	0.1	0	-0.04	0.540584	0.984158	0.253929	0.797221	0.966207	0.999773	0.861131	0.986585	6.1561e+06	6.44306e+06	6.59465e+06	6.43461e+06	High	High	High	High	753
High	Master Protein	P97805	Protein FAM3D OS=Mus musculus OX=10090 GN=Fam3d PE=2 SV=2	0	88.774	56	12	35	11	1	223	113.08	12	1	1.047	1.174	1.143	1.02	0.07	0.23	0.19	0.03	0.652417	0.302783	0.717792	0.821729	0.984024	0.873013	0.986902	0.990603	1.51477e+07	1.58657e+07	1.77865e+07	1.81403e+07	High	High	High	High	754
High	Master Protein	Q61165	Sodium/hydrogen exchanger 1 OS=Mus musculus OX=10090 GN=Slc9a1 PE=1 SV=1	0	125.469	25	16	36	16	1	820	109.73	16	0	1.047	1.197	1.172	1.025	0.07	0.26	0.23	0.04	0.271814	0.252626	0.720828	0.817475	0.860694	0.830853	0.986902	0.990603	3.11317e+06	3.25876e+06	3.7277e+06	3.81983e+06	High	High	High	High	755
High	Master Protein	Q9JI13	Something about silencing protein 10 OS=Mus musculus OX=10090 GN=Utp3 PE=1 SV=1	0	17.785	13	5	5	5	1	469	11.5	5	0	1.047	1.083	1.097	1.061	0.07	0.11	0.13	0.09	0.29856	0.939041	0.583078	0.740104	0.877483	0.995494	0.970956	0.977575	572701	599903	620045	657816	High	High	High	High	756
High	Master Protein	Q91XD2	LIM and senescent cell antigen-like-containing domain protein 2 OS=Mus musculus OX=10090 GN=Lims2 PE=1 SV=1	0	24.454	17	7	10	2	1	341	21.33	7	0	1.047	1.095	1.14	1.09	0.07	0.13	0.19	0.12	0.285903	0.947929	0.760726	0.546871	0.875163	0.996703	0.988083	0.965089	274440	287281	300623	327602	High	High	High	High	757
High	Master Protein	P21845	Tryptase beta-2 OS=Mus musculus OX=10090 GN=Tpsb2 PE=1 SV=2	0	19.612	14	3	4	3	1	276	17.82	3	0	1.047	1.119	1.163	1.088	0.07	0.16	0.22	0.12	0.351965	0.868748	0.962099	0.503246	0.917539	0.995494	0.996918	0.954014	110107	115259	123200	134095	High	High	High	High	758
High	Master Protein	P59672	Ankyrin repeat and SAM domain-containing protein 1A OS=Mus musculus OX=10090 GN=Anks1a PE=1 SV=3	0	11.376	4	4	5	3	1	1150	5.61	4	1	1.047	1.09	1.154	1.109	0.07	0.12	0.21	0.15	0.351847	0.903936	0.805128	0.427012	0.917539	0.995494	0.990777	0.92187	64632.2	67648.7	70421.3	78096.3	High	High	High	High	759
High	Master Protein	O35711	Liprin-beta-2 OS=Mus musculus OX=10090 GN=Ppfibp2 PE=1 SV=3	0	27.707	9	8	11	6	1	882	22.61	8	2	1.047	1.212	1.457	1.259	0.07	0.28	0.54	0.33	0.25717	0.319246	0.0199074	0.0722311	0.853291	0.885306	0.222191	0.501277	347289	363662	420759	529802	High	High	High	High	760
High	Master Protein	Q5SWU9	Acetyl-CoA carboxylase 1 OS=Mus musculus OX=10090 GN=Acaca PE=1 SV=1	0	230.279	21	44	68	32	1	2345	183.59	44	0	1.047	1.146	1.527	1.396	0.07	0.2	0.61	0.48	0.288342	0.571479	0.00311193	0.00535	0.875812	0.965076	0.0515552	0.0899449	2.10827e+06	2.20785e+06	2.41564e+06	3.37209e+06	High	High	High	High	761
High	Master Protein	Q9QYF9	Protein NDRG3 OS=Mus musculus OX=10090 GN=Ndrg3 PE=1 SV=1	0	24.839	17	4	5	4	1	375	18.44	4	0	1.046	1.191	0.967	0.85	0.07	0.25	-0.05	-0.23	0.315573	0.303778	0.0664498	0.108488	0.889208	0.874875	0.486595	0.595914	1.11535e+06	1.16699e+06	1.32803e+06	1.1285e+06	High	High	High	High	762
High	Master Protein	Q9CR61	NADH dehydrogenase [ubiquinone] 1 beta subcomplex subunit 7 OS=Mus musculus OX=10090 GN=Ndufb7 PE=1 SV=3	0	162.62	73	13	98	13	1	137	294.21	13	0	1.046	1.061	0.971	0.958	0.06	0.09	-0.04	-0.06	0.661201	0.911911	0.284737	0.530416	0.984024	0.995494	0.876985	0.959664	9.36957e+06	9.80104e+06	9.93853e+06	9.51979e+06	High	High	High	High	763
High	Master Protein	Q9EP71	Ankycorbin OS=Mus musculus OX=10090 GN=Rai14 PE=1 SV=1	0	39.389	11	9	12	9	1	979	21.27	9	0	1.046	1.376	1.29	0.98	0.06	0.46	0.37	-0.03	0.263503	0.0290472	0.295026	0.761523	0.854774	0.271699	0.887903	0.982105	367276	384072	505537	495262	High	High	High	High	764
High	Master Protein	P70460	Vasodilator-stimulated phosphoprotein OS=Mus musculus OX=10090 GN=Vasp PE=1 SV=4	0	98.448	40	15	32	15	1	375	71.13	15	0	1.046	1.152	1.182	1.074	0.07	0.2	0.24	0.1	0.276296	0.535138	0.722704	0.535144	0.863992	0.955628	0.986902	0.962776	2.68156e+06	2.80591e+06	3.08839e+06	3.31684e+06	High	High	High	High	765
High	Master Protein	O88844	Isocitrate dehydrogenase [NADP] cytoplasmic OS=Mus musculus OX=10090 GN=Idh1 PE=1 SV=2	0	158.809	48	24	46	23	1	414	131.39	24	0	1.046	0.848	0.924	1.14	0.07	-0.24	-0.11	0.19	0.450826	0.0110462	0.0495593	0.30105	0.946262	0.139001	0.40994	0.869518	5.52884e+06	5.78583e+06	4.68988e+06	5.34734e+06	High	High	High	High	766
High	Master Protein	Q9CYA0	Protein disulfide isomerase Creld2 OS=Mus musculus OX=10090 GN=Creld2 PE=1 SV=1	0	41.195	34	9	9	9	1	350	14.65	9	0	1.046	1.06	1.159	1.143	0.06	0.08	0.21	0.19	0.304806	0.896479	0.981795	0.287836	0.877483	0.995494	0.999773	0.85925	879011	919040	931824	1.06543e+06	High	High	High	High	767
High	Master Protein	P63254	Cysteine-rich protein 1 OS=Mus musculus OX=10090 GN=Crip1 PE=1 SV=2	0	11.311	35	4	7	4	1	77	11.21	4	0	1.046	1.14	1.412	1.295	0.06	0.19	0.5	0.37	0.302834	0.585143	0.0221686	0.00808031	0.877483	0.967694	0.238723	0.126693	1.28359e+06	1.3426e+06	1.46385e+06	1.89524e+06	High	High	High	High	768
High	Master Protein	Q6NVF9	Cleavage and polyadenylation specificity factor subunit 6 OS=Mus musculus OX=10090 GN=Cpsf6 PE=1 SV=1	0	17.159	12	5	5	5	1	551	14.91	5	0	1.046	0.999	1.36	1.424	0.06	0	0.44	0.51	0.258131	0.405804	0.103967	0.00505361	0.853291	0.915547	0.617536	0.0859557	371457	388429	371037	528338	High	High	High	High	769
High	Master Protein	Q9QYR9	Acyl-coenzyme A thioesterase 2, mitochondrial OS=Mus musculus OX=10090 GN=Acot2 PE=1 SV=2	0	93.425	26	13	25	13	1	453	87.95	13	0	1.045	1.142	1.007	0.921	0.06	0.19	0.01	-0.12	0.289763	0.630977	0.128079	0.437488	0.876704	0.97492	0.673142	0.92861	2.0507e+06	2.14202e+06	2.34283e+06	2.15805e+06	High	High	High	High	770
High	Master Protein	Q64310	Surfeit locus protein 4 OS=Mus musculus OX=10090 GN=Surf4 PE=1 SV=1	0	41.568	24	6	23	6	1	269	54.57	6	0	1.045	1.057	0.983	0.971	0.06	0.08	-0.02	-0.04	0.318289	0.701897	0.0689575	0.765494	0.892559	0.98508	0.496887	0.983771	1.51912e+06	1.58693e+06	1.60638e+06	1.56026e+06	High	High	High	High	771
High	Master Protein	P63001	Ras-related C3 botulinum toxin substrate 1 OS=Mus musculus OX=10090 GN=Rac1 PE=1 SV=1	0	80.036	44	10	47	5	1	192	153.81	10	4	1.045	1.111	1.048	0.986	0.06	0.15	0.07	-0.02	0.66823	0.595708	0.690111	0.659012	0.984024	0.969192	0.986902	0.970324	1.12715e+07	1.17785e+07	1.25238e+07	1.23497e+07	High	High	High	High	772
High	Master Protein	P63038	60 kDa heat shock protein, mitochondrial OS=Mus musculus OX=10090 GN=Hspd1 PE=1 SV=1	0	781.158	82	54	396	54	1	573	1414.17	54	0	1.045	1.05	1.108	1.103	0.06	0.07	0.15	0.14	0.664855	0.982239	0.93078	0.782303	0.984024	0.999773	0.99388	0.986585	1.24362e+08	1.3002e+08	1.30632e+08	1.44081e+08	High	High	High	High	773
High	Master Protein	Q9D1N9	39S ribosomal protein L21, mitochondrial OS=Mus musculus OX=10090 GN=Mrpl21 PE=1 SV=1	0	22.4	24	4	6	4	1	209	18.23	4	0	1.045	1.004	1.13	1.176	0.06	0.01	0.18	0.23	0.237317	0.460926	0.711187	0.204488	0.834572	0.930416	0.986902	0.76545	322060	336396	323220	380254	High	High	High	High	774
High	Master Protein	P97429	Annexin A4 OS=Mus musculus OX=10090 GN=Anxa4 PE=1 SV=4	0	218.023	68	27	90	26	1	319	259.98	27	0	1.045	0.971	1.136	1.223	0.06	-0.04	0.18	0.29	0.665597	0.490206	0.760215	0.347574	0.984024	0.944689	0.988083	0.888764	1.00942e+07	1.05522e+07	9.80068e+06	1.19881e+07	High	High	High	High	775
High	Master Protein	P62858	40S ribosomal protein S28 OS=Mus musculus OX=10090 GN=Rps28 PE=1 SV=1	0	27.849	57	5	12	5	1	69	21.24	5	0	1.045	1.097	1.567	1.492	0.06	0.13	0.65	0.58	0.270832	0.920952	0.000925171	0.0014488	0.860694	0.995494	0.0201493	0.0312136	394840	412486	433277	646368	High	High	High	High	776
High	Master Protein	Q3U487	E3 ubiquitin-protein ligase HECTD3 OS=Mus musculus OX=10090 GN=Hectd3 PE=1 SV=2	0	39.58	13	9	10	9	1	861	25.49	9	0	1.044	1.147	1.042	0.949	0.06	0.2	0.06	-0.08	0.314626	0.608175	0.267281	0.539592	0.889148	0.97181	0.863956	0.964831	231113	241309	265022	251488	High	High	High	High	777
High	Master Protein	Q8CD26	Solute carrier family 35 member E1 OS=Mus musculus OX=10090 GN=Slc35e1 PE=1 SV=2	0	9.801	4	2	3	2	1	409	5.22	2	0	1.044	1.242	1.141	0.959	0.06	0.31	0.19	-0.06	0.329786	0.213376	0.797453	0.626077	0.897956	0.782061	0.990777	0.966275	171704	179212	213205	204423	High	High	High	High	778
High	Master Protein	Q8JZN5	Complex I assembly factor ACAD9, mitochondrial OS=Mus musculus OX=10090 GN=Acad9 PE=1 SV=2	0	287.113	52	35	112	35	1	625	308.14	35	0	1.044	1.12	1.079	1.006	0.06	0.16	0.11	0.01	0.673157	0.545335	0.884136	0.753771	0.984024	0.958738	0.990777	0.980157	1.56678e+07	1.63608e+07	1.75519e+07	1.76559e+07	High	High	High	High	779
High	Master Protein	P67778	Prohibitin 1 OS=Mus musculus OX=10090 GN=Phb1 PE=1 SV=1	0	195.87	83	19	109	19	1	272	333.85	19	0	1.044	1.079	1.045	1.011	0.06	0.11	0.06	0.02	0.672588	0.788006	0.67164	0.780648	0.984024	0.988107	0.986902	0.986585	3.59666e+07	3.75605e+07	3.88237e+07	3.9269e+07	High	High	High	High	780
High	Master Protein	Q8VD57	Vesicle transport protein SFT2B OS=Mus musculus OX=10090 GN=Sft2d2 PE=1 SV=1	0	14.873	18	3	6	3	1	159	13.4	3	0	1.044	1.073	1.069	1.041	0.06	0.1	0.1	0.06	0.271926	0.910245	0.345995	0.87007	0.860694	0.995494	0.911286	0.995594	402197	419842	431485	448961	High	High	High	High	781
High	Master Protein	Q9Z2W0	Aspartyl aminopeptidase OS=Mus musculus OX=10090 GN=Dnpep PE=1 SV=2	0	50.693	26	11	15	11	1	473	36.29	11	0	1.044	1.067	1.129	1.105	0.06	0.09	0.17	0.14	0.310416	0.774739	0.823073	0.352709	0.883259	0.987205	0.990777	0.888764	1.7379e+06	1.81511e+06	1.85355e+06	2.04893e+06	High	High	High	High	782
High	Master Protein	Q9QXS6	Drebrin OS=Mus musculus OX=10090 GN=Dbn1 PE=1 SV=4	0	189.199	29	22	64	22	1	706	189.84	22	0	1.044	0.941	1.088	1.207	0.06	-0.09	0.12	0.27	0.401159	0.148311	0.75179	0.136363	0.931026	0.687364	0.986902	0.666945	4.97425e+06	5.19471e+06	4.68222e+06	5.65202e+06	High	High	High	High	783
High	Master Protein	Q5HZI9	Mitochondrial nicotinamide adenine dinucleotide transporter SLC25A51 OS=Mus musculus OX=10090 GN=Slc25a51 PE=1 SV=1	0	31.349	36	11	13	11	1	298	25.79	11	0	1.044	1.032	1.298	1.313	0.06	0.05	0.38	0.39	0.273288	0.599184	0.244011	0.0338515	0.860803	0.969703	0.858106	0.321794	412791	431094	426157	559521	High	High	High	High	784
High	Master Protein	Q9JLM4	Zinc finger MYM-type protein 3 OS=Mus musculus OX=10090 GN=Zmym3 PE=1 SV=1	0.006	4.832	1	2	2	2	1	1370	4.61	2	0	1.043	1.202	0.876	0.761	0.06	0.27	-0.19	-0.39	0.318445	0.612853	0.0208961	0.0732742	0.892566	0.974912	0.230404	0.506084	20008.4	20875.3	24043.7	18288.7	High	High	High	High	785
High	Master Protein	Q4FZC9	Nesprin-3 OS=Mus musculus OX=10090 GN=Syne3 PE=1 SV=1	0.003	5.754	2	2	2	2	1	975	4.14	2	0	1.043	1.217	1.079	0.925	0.06	0.28	0.11	-0.11	0.359201	0.4313	0.381169	0.529263	0.918957	0.92385	0.91887	0.959216	54365.8	56721.2	66189.7	61202.1	High	High	High	High	786
High	Master Protein	Q3UM18	Large subunit GTPase 1 homolog OS=Mus musculus OX=10090 GN=Lsg1 PE=1 SV=2	0	18.346	9	6	6	5	1	644	7.77	6	0	1.043	1.057	0.986	0.974	0.06	0.08	-0.02	-0.04	0.302088	0.737265	0.0780803	0.729933	0.877483	0.98508	0.531038	0.975648	475941	496536	503104	489830	High	High	High	High	787
High	Master Protein	P62313	U6 snRNA-associated Sm-like protein LSm6 OS=Mus musculus OX=10090 GN=Lsm6 PE=1 SV=1	0	17.047	38	4	6	4	1	80	13.24	4	0	1.043	1.131	1.053	0.97	0.06	0.18	0.07	-0.04	0.326129	0.649394	0.336358	0.739113	0.895831	0.97492	0.911286	0.977575	1.30862e+06	1.36464e+06	1.48067e+06	1.43688e+06	High	High	High	High	788
High	Master Protein	Q8C7V3	U3 small nucleolar RNA-associated protein 15 homolog OS=Mus musculus OX=10090 GN=Utp15 PE=1 SV=1	0	22.337	13	7	9	7	1	528	17.62	7	0	1.043	1.107	1.045	0.984	0.06	0.15	0.06	-0.02	0.323608	0.886548	0.272623	0.803462	0.895831	0.995494	0.867824	0.986585	568469	592802	629261	619363	High	High	High	High	789
High	Master Protein	Q925I1	ATPase family AAA domain-containing protein 3 OS=Mus musculus OX=10090 GN=Atad3 PE=1 SV=1	0	256.083	55	38	115	38	1	591	320.54	38	0	1.043	1.083	1.084	1.043	0.06	0.12	0.12	0.06	0.682447	0.763508	0.912529	0.935479	0.984024	0.987135	0.991669	0.997966	2.48963e+07	2.59624e+07	2.69691e+07	2.81324e+07	High	High	High	High	790
High	Master Protein	P48678	Prelamin-A/C OS=Mus musculus OX=10090 GN=Lmna PE=1 SV=2	0	590.043	75	63	285	61	1	665	856.55	63	2	1.043	0.933	0.942	1.054	0.06	-0.1	-0.09	0.08	0.67974	0.29168	0.181015	0.987684	0.984024	0.861992	0.775114	0.999848	6.49854e+07	6.77947e+07	6.06053e+07	6.38693e+07	High	High	High	High	791
High	Master Protein	Q91W90	Thioredoxin domain-containing protein 5 OS=Mus musculus OX=10090 GN=Txndc5 PE=1 SV=2	0	122.233	46	18	48	17	1	417	135.55	18	0	1.043	1.128	1.165	1.078	0.06	0.17	0.22	0.11	0.364994	0.629395	0.738346	0.555574	0.918957	0.97492	0.986902	0.965089	4.28421e+06	4.46836e+06	4.83092e+06	5.20735e+06	High	High	High	High	792
High	Master Protein	P59708	Splicing factor 3B subunit 6 OS=Mus musculus OX=10090 GN=Sf3b6 PE=1 SV=1	0	23.812	34	4	10	4	1	125	24.88	4	0	1.043	1.082	1.139	1.098	0.06	0.11	0.19	0.13	0.295706	0.919055	0.841081	0.546531	0.876704	0.995494	0.990777	0.965089	449302	468594	486278	533766	High	High	High	High	793
High	Master Protein	Q9JM13	Rab5 GDP/GTP exchange factor OS=Mus musculus OX=10090 GN=Rabgef1 PE=1 SV=1	0	19.342	10	5	6	5	1	491	13.44	5	0	1.043	0.995	1.071	1.123	0.06	-0.01	0.1	0.17	0.312239	0.390495	0.396026	0.418038	0.886278	0.908438	0.932595	0.920105	244343	254738	243058	272908	High	High	High	High	794
High	Master Protein	Q8C0P5	Coronin-2A OS=Mus musculus OX=10090 GN=Coro2a PE=2 SV=1	0	45.141	20	11	17	9	1	524	40.76	11	1	1.043	1.013	1.193	1.229	0.06	0.02	0.25	0.3	0.340081	0.374341	0.686363	0.0712121	0.908549	0.904431	0.986902	0.497288	1.35057e+06	1.40911e+06	1.36761e+06	1.68109e+06	High	High	High	High	795
High	Master Protein	Q91WQ3	Tyrosine--tRNA ligase, cytoplasmic OS=Mus musculus OX=10090 GN=Yars1 PE=1 SV=3	0	81.257	47	25	31	25	1	528	60.72	25	0	1.043	1.051	1.298	1.288	0.06	0.07	0.38	0.37	0.29638	0.644227	0.199007	0.0271507	0.877296	0.97492	0.802564	0.284057	2.4867e+06	2.59362e+06	2.61387e+06	3.36664e+06	High	High	High	High	796
High	Master Protein	P33610	DNA primase large subunit OS=Mus musculus OX=10090 GN=Prim2 PE=1 SV=1	0.003	5.908	6	3	3	2	1	505	6.73	3	0	1.042	1.486	1.118	0.784	0.06	0.57	0.16	-0.35	0.34376	0.0266986	0.498384	0.0700362	0.914521	0.257599	0.957561	0.495134	36562.8	38108.6	54341.8	42617.6	High	High	High	High	797
High	Master Protein	Q8R3N1	Nucleolar protein 14 OS=Mus musculus OX=10090 GN=Nop14 PE=1 SV=2	0	20.396	9	7	9	7	1	860	13.79	7	0	1.042	1.261	1.099	0.908	0.06	0.33	0.14	-0.14	0.315254	0.166983	0.515579	0.332162	0.889208	0.723787	0.959252	0.882423	258711	269594	326240	296387	High	High	High	High	798
High	Master Protein	Q3UHH8	Glucoside xylosyltransferase 1 OS=Mus musculus OX=10090 GN=Gxylt1 PE=1 SV=2	0	25.913	17	6	9	6	1	404	14.31	6	0	1.042	1.182	1.085	0.957	0.06	0.24	0.12	-0.06	0.330105	0.380243	0.515329	0.558274	0.898405	0.905919	0.959232	0.965089	661266	689046	781434	747494	High	High	High	High	799
High	Master Protein	Q9DB73	NADH-cytochrome b5 reductase 1 OS=Mus musculus OX=10090 GN=Cyb5r1 PE=1 SV=1	0	56.979	47	12	19	12	1	305	54.82	12	0	1.042	1.04	0.991	0.993	0.06	0.06	-0.01	-0.01	0.298671	0.549941	0.0900414	0.932259	0.877483	0.958738	0.57036	0.997966	1.88317e+06	1.96248e+06	1.9587e+06	1.94542e+06	High	High	High	High	800
High	Master Protein	Q78RX3	Small integral membrane protein 12 OS=Mus musculus OX=10090 GN=Smim12 PE=3 SV=1	0.006	4.608	21	2	3	2	1	92	2.05	2	0	1.042	1.018	1.005	1.028	0.06	0.03	0.01	0.04	0.360064	0.539903	0.180995	0.81453	0.918957	0.957519	0.775114	0.990203	122491	127581	124637	128158	High	High	High	High	801
High	Master Protein	Q08024	Core-binding factor subunit beta OS=Mus musculus OX=10090 GN=Cbfb PE=1 SV=1	0.002	6.212	17	4	4	4	1	187	6.7	4	0	1.042	1.259	1.255	1.039	0.06	0.33	0.33	0.06	0.333728	0.174468	0.511845	0.829613	0.899426	0.728973	0.959125	0.992256	175436	182859	220824	229413	High	High	High	High	802
High	Master Protein	B2RX12	ATP-binding cassette sub-family C member 3 OS=Mus musculus OX=10090 GN=Abcc3 PE=1 SV=2	0	235.218	29	40	69	38	1	1523	191.71	40	2	1.042	1.018	1.049	1.074	0.06	0.03	0.07	0.1	0.478493	0.585171	0.480965	0.619519	0.950422	0.967694	0.957561	0.96579	5.52444e+06	5.75827e+06	5.62392e+06	6.03996e+06	High	High	High	High	803
High	Master Protein	P56857	Claudin-18 OS=Mus musculus OX=10090 GN=Cldn18 PE=1 SV=1	0	44.416	20	8	38	8	1	264	81.03	8	0	1.042	1.057	1.085	1.07	0.06	0.08	0.12	0.1	0.686735	0.936487	0.921752	0.936107	0.984024	0.995494	0.992004	0.997966	1.19681e+07	1.24728e+07	1.26515e+07	1.35333e+07	High	High	High	High	804
High	Master Protein	Q9Z0X1	Apoptosis-inducing factor 1, mitochondrial OS=Mus musculus OX=10090 GN=Aifm1 PE=1 SV=1	0	439.721	54	30	207	30	1	612	701.4	30	0	1.042	0.997	1.077	1.125	0.06	0	0.11	0.17	0.68538	0.655088	0.868388	0.685612	0.984024	0.97492	0.990777	0.970324	3.66099e+07	3.81614e+07	3.65137e+07	4.10887e+07	High	High	High	High	805
High	Master Protein	P32507	Nectin-2 OS=Mus musculus OX=10090 GN=Nectin2 PE=1 SV=2	0	18.092	8	3	3	3	1	530	12.24	3	0	1.042	1.028	1.163	1.179	0.06	0.04	0.22	0.24	0.388353	0.553842	0.930698	0.19668	0.92493	0.958738	0.99388	0.757173	81118.9	84501.7	83367.1	98317.3	High	High	High	High	806
High	Master Protein	Q8BGD9	Eukaryotic translation initiation factor 4B OS=Mus musculus OX=10090 GN=Eif4b PE=1 SV=1	0	19.998	11	5	5	5	1	611	6.43	5	0	1.042	1.121	1.357	1.262	0.06	0.16	0.44	0.34	0.372399	0.825251	0.177726	0.0686037	0.922781	0.991263	0.769527	0.489653	147207	153368	164969	208184	High	High	High	High	807
High	Master Protein	P17751	Triosephosphate isomerase OS=Mus musculus OX=10090 GN=Tpi1 PE=1 SV=5	0	182.306	77	18	77	18	1	249	250.29	18	0	1.042	0.794	1.106	1.453	0.06	-0.33	0.15	0.54	0.686548	0.0119792	0.941641	0.0412596	0.984024	0.145855	0.995532	0.365865	1.3211e+07	1.37686e+07	1.0487e+07	1.52339e+07	High	High	High	High	808
Medium	Master Protein	Q8R1R3	StAR-related lipid transfer protein 7, mitochondrial OS=Mus musculus OX=10090 GN=Stard7 PE=1 SV=2	0.017	3.316	4	2	2	2	1	373	3.83	2	0	1.041	1.211	1.143	0.982	0.06	0.28	0.19	-0.03	0.381432	0.409976	0.844078	0.905121	0.924147	0.915976	0.990777	0.995594	110284	114772	133601	131207	High	High	High	High	809
High	Master Protein	Q07813	Apoptosis regulator BAX OS=Mus musculus OX=10090 GN=Bax PE=1 SV=1	0	41.06	34	5	12	5	1	192	29.92	5	0	1.041	1.188	1.145	1.003	0.06	0.25	0.2	0	0.288953	0.396737	0.828927	0.903758	0.875812	0.911639	0.990777	0.995594	364345	379271	432961	434370	High	High	High	High	810
High	Master Protein	Q9CQE7	Endoplasmic reticulum-Golgi intermediate compartment protein 3 OS=Mus musculus OX=10090 GN=Ergic3 PE=1 SV=1	0	37.316	28	13	16	13	1	383	25.09	13	0	1.041	1.032	0.995	1.004	0.06	0.05	-0.01	0.01	0.355543	0.541397	0.105163	0.933619	0.918483	0.957519	0.621314	0.997966	1.4456e+06	1.50501e+06	1.4922e+06	1.49809e+06	High	High	High	High	811
High	Master Protein	P61027	Ras-related protein Rab-10 OS=Mus musculus OX=10090 GN=Rab10 PE=1 SV=1	0	142.389	75	19	84	15	1	200	258.27	19	4	1.041	1.03	1.012	1.022	0.06	0.04	0.02	0.03	0.695897	0.878889	0.478052	0.833439	0.984024	0.995494	0.957561	0.992873	4.2565e+07	4.43018e+07	4.38565e+07	4.48341e+07	High	High	High	High	812
High	Master Protein	Q922H2	[Pyruvate dehydrogenase (acetyl-transferring)] kinase isozyme 3, mitochondrial OS=Mus musculus OX=10090 GN=Pdk3 PE=1 SV=1	0	60.165	33	14	19	13	1	415	48.03	14	1	1.041	1.161	1.135	1.018	0.06	0.22	0.18	0.03	0.311453	0.464123	0.876928	0.897524	0.885341	0.931163	0.990777	0.995594	2.1434e+06	2.23215e+06	2.48934e+06	2.53318e+06	High	High	High	High	813
High	Master Protein	Q8CGK3	Lon protease homolog, mitochondrial OS=Mus musculus OX=10090 GN=Lonp1 PE=1 SV=2	0	475.443	52	52	185	51	1	949	531.77	52	1	1.041	1.083	1.077	1.035	0.06	0.11	0.11	0.05	0.697704	0.765774	0.873377	0.89729	0.984024	0.987135	0.990777	0.995594	2.05873e+07	2.14218e+07	2.2294e+07	2.30817e+07	High	High	High	High	814
High	Master Protein	Q61387	Cytochrome c oxidase subunit 7A-related protein, mitochondrial OS=Mus musculus OX=10090 GN=Cox7a2l PE=1 SV=1	0	46.103	68	6	12	6	1	111	40.68	6	0	1.041	1.03	1.041	1.051	0.06	0.04	0.06	0.07	0.314463	0.465977	0.270632	0.66122	0.889118	0.93185	0.867057	0.970324	2.15192e+06	2.2394e+06	2.21716e+06	2.33083e+06	High	High	High	High	815
High	Master Protein	Q3TLH4	Protein PRRC2C OS=Mus musculus OX=10090 GN=Prrc2c PE=1 SV=3	0.008	4.468	1	2	2	2	1	2846	0	2	0	1.041	1.057	1.225	1.206	0.06	0.08	0.29	0.27	0.363979	0.69237	0.884101	0.1535	0.918957	0.983544	0.990777	0.697043	48567	50553.1	51321.5	61911.9	High	High	High	High	816
High	Master Protein	Q9WVA4	Transgelin-2 OS=Mus musculus OX=10090 GN=Tagln2 PE=1 SV=4	0	229.348	80	18	95	18	1	199	285.46	18	0	1.041	0.936	1.095	1.217	0.06	-0.1	0.13	0.28	0.697758	0.306008	0.984831	0.363362	0.984024	0.875771	0.999985	0.897005	1.9715e+07	2.05139e+07	1.84489e+07	2.24599e+07	High	High	High	High	817
High	Master Protein	Q64669	NAD(P)H dehydrogenase [quinone] 1 OS=Mus musculus OX=10090 GN=Nqo1 PE=1 SV=3	0	116.802	41	17	54	17	1	274	139.1	17	0	1.041	0.636	0.8	1.308	0.06	-0.65	-0.32	0.39	0.694084	6.41914e-06	0.00547567	0.140962	0.984024	0.000223632	0.0849763	0.679696	1.1358e+07	1.18245e+07	7.22901e+06	9.45392e+06	High	High	High	High	818
High	Master Protein	Q8BJ05	Zinc finger CCCH domain-containing protein 14 OS=Mus musculus OX=10090 GN=Zc3h14 PE=1 SV=1	0	9.096	3	2	2	2	1	735	6.54	2	0	1.041	1.123	1.445	1.339	0.06	0.17	0.53	0.42	0.371163	0.921814	0.0894093	0.0212939	0.922781	0.995494	0.569458	0.243353	53703.9	55889.9	60308.6	80774	High	High	High	High	819
High	Master Protein	Q6PDN3	Myosin light chain kinase, smooth muscle OS=Mus musculus OX=10090 GN=Mylk PE=1 SV=3	0	325.028	25	43	100	42	1	1941	286.44	43	1	1.04	1.363	1.166	0.889	0.06	0.45	0.22	-0.17	0.700263	0.0171733	0.595909	0.269583	0.984024	0.188874	0.970956	0.845668	9.42931e+06	9.80792e+06	1.28565e+07	1.1432e+07	High	High	High	High	820
Medium	Master Protein	Q9Z148	Histone-lysine N-methyltransferase EHMT2 OS=Mus musculus OX=10090 GN=Ehmt2 PE=1 SV=2	0.01	4.055	1	2	2	2	1	1263	2.03	2	0	1.04	1.219	1.175	1.003	0.06	0.29	0.23	0	0.371321	0.443887	0.926542	0.979791	0.922781	0.92792	0.992784	0.999848	67096.9	69802.8	81801.3	82029	High	High	High	High	821
High	Master Protein	Q5FWK3	Rho GTPase-activating protein 1 OS=Mus musculus OX=10090 GN=Arhgap1 PE=1 SV=1	0	158.852	54	24	66	23	1	439	173.26	24	0	1.04	1.117	1.086	1.012	0.06	0.16	0.12	0.02	0.629905	0.680949	0.833308	0.878285	0.984024	0.981182	0.990777	0.995594	6.94701e+06	7.227e+06	7.75953e+06	7.84966e+06	High	High	High	High	822
High	Master Protein	Q9CXW4	60S ribosomal protein L11 OS=Mus musculus OX=10090 GN=Rpl11 PE=1 SV=4	0	39.591	31	7	22	7	1	178	48.04	7	0	1.04	1.184	1.179	1.036	0.06	0.24	0.24	0.05	0.606925	0.382897	0.582335	0.979473	0.980924	0.906777	0.970956	0.999848	6.35974e+06	6.61212e+06	7.52847e+06	7.79857e+06	High	High	High	High	823
High	Master Protein	Q9JLM8	Serine/threonine-protein kinase DCLK1 OS=Mus musculus OX=10090 GN=Dclk1 PE=1 SV=1	0	12.77	3	3	6	3	1	756	8.09	3	0	1.04	1.026	1.077	1.091	0.06	0.04	0.11	0.13	0.364948	0.506272	0.476422	0.46504	0.918957	0.944976	0.957561	0.938958	1.06435e+06	1.10643e+06	1.09209e+06	1.19191e+06	High	High	High	High	824
High	Master Protein	Q8R0W0	Epiplakin OS=Mus musculus OX=10090 GN=Eppk1 PE=1 SV=2	0	434.845	51	66	158	62	1	6548	423.89	66	0	1.04	1.055	1.22	1.203	0.06	0.08	0.29	0.27	0.698564	0.94894	0.350983	0.404778	0.984024	0.996703	0.911286	0.920105	1.14205e+07	1.1882e+07	1.20518e+07	1.44993e+07	High	High	High	High	825
High	Master Protein	Q64464	Cytochrome P450 3A13 OS=Mus musculus OX=10090 GN=Cyp3a13 PE=1 SV=1	0	154.138	48	24	58	24	1	503	166.98	24	0	1.04	0.943	1.102	1.214	0.06	-0.08	0.14	0.28	0.603959	0.254867	0.89979	0.212182	0.980314	0.8319	0.991669	0.779679	6.49538e+06	6.75436e+06	6.12784e+06	7.44092e+06	High	High	High	High	826
High	Master Protein	Q64433	10 kDa heat shock protein, mitochondrial OS=Mus musculus OX=10090 GN=Hspe1 PE=1 SV=2	0	68.258	81	11	53	11	1	102	124.83	11	0	1.04	0.841	0.997	1.232	0.06	-0.25	0	0.3	0.700754	0.0467362	0.398535	0.323703	0.984024	0.372481	0.932595	0.880835	2.84424e+07	2.95824e+07	2.39239e+07	2.94815e+07	High	High	High	High	827
High	Master Protein	Q3UKJ7	WD40 repeat-containing protein SMU1 OS=Mus musculus OX=10090 GN=Smu1 PE=2 SV=2	0	40.416	21	10	18	10	1	513	39.5	10	0	1.04	0.973	1.183	1.265	0.06	-0.04	0.24	0.34	0.358098	0.17874	0.754992	0.0299163	0.918957	0.734399	0.986902	0.299927	1.4272e+06	1.48494e+06	1.38882e+06	1.75726e+06	High	High	High	High	828
High	Master Protein	P10854	Histone H2B type 1-M OS=Mus musculus OX=10090 GN=H2bc14 PE=1 SV=2	0	114.488	59	10	251	3	1	126	793.27	10	9	1.039	1.081	0.852	0.819	0.06	0.11	-0.23	-0.29	0.708142	0.776268	0.0263578	0.102204	0.984024	0.987205	0.270319	0.58041	5.61408e+08	5.83293e+08	6.07029e+08	4.96899e+08	High	High	High	High	829
High	Master Protein	Q8BKC5	Importin-5 OS=Mus musculus OX=10090 GN=Ipo5 PE=1 SV=3	0	337.233	47	42	110	42	1	1097	332.45	42	0	1.039	1.32	1.096	0.863	0.06	0.4	0.13	-0.21	0.552268	0.0736818	0.828882	0.2445	0.967506	0.491606	0.990777	0.815515	5.90944e+06	6.1397e+06	7.80249e+06	6.73162e+06	High	High	High	High	830
High	Master Protein	Q8CBE3	WD repeat-containing protein 37 OS=Mus musculus OX=10090 GN=Wdr37 PE=1 SV=1	0	12.469	4	2	3	2	1	496	7.94	2	0	1.039	1.258	1.069	0.882	0.05	0.33	0.1	-0.18	0.394776	0.27297	0.365156	0.333811	0.929089	0.846104	0.91735	0.882423	72973.9	75787.3	91836	81005.9	High	High	High	High	831
High	Master Protein	P02469	Laminin subunit beta-1 OS=Mus musculus OX=10090 GN=Lamb1 PE=1 SV=3	0	22.981	5	7	7	7	1	1786	13.71	7	0	1.039	1.136	1.057	0.967	0.06	0.18	0.08	-0.05	0.378771	0.771662	0.374321	0.801459	0.924147	0.987205	0.91735	0.986585	111630	116026	126788	122586	High	High	High	High	832
High	Master Protein	Q8BXJ9	Transmembrane protein 62 OS=Mus musculus OX=10090 GN=Tmem62 PE=2 SV=1	0	17.319	6	4	4	4	1	643	12.92	4	0	1.039	0.98	0.946	1.004	0.06	-0.03	-0.08	0.01	0.354068	0.318751	0.0446232	0.941444	0.918203	0.8852	0.380475	0.998852	200176	208015	196081	196797	High	High	High	High	833
High	Master Protein	P97370	Sodium/potassium-transporting ATPase subunit beta-3 OS=Mus musculus OX=10090 GN=Atp1b3 PE=1 SV=1	0	10.157	13	3	4	3	1	278	7.04	3	0	1.039	1.131	1.095	1.006	0.06	0.18	0.13	0.01	0.344773	0.672737	0.600444	0.994173	0.914521	0.978969	0.970956	0.999848	1.28099e+06	1.33121e+06	1.44865e+06	1.45774e+06	High	High	High	High	834
High	Master Protein	Q9CQN1	Heat shock protein 75 kDa, mitochondrial OS=Mus musculus OX=10090 GN=Trap1 PE=1 SV=1	0	352.632	58	40	145	39	1	706	452.61	40	0	1.039	1.168	1.139	1.013	0.06	0.22	0.19	0.02	0.708578	0.325574	0.74319	0.788303	0.984024	0.893075	0.986902	0.986585	1.37e+07	1.42331e+07	1.60025e+07	1.62112e+07	High	High	High	High	835
High	Master Protein	Q791V5	Mitochondrial carrier homolog 2 OS=Mus musculus OX=10090 GN=Mtch2 PE=1 SV=1	0	120.315	50	12	50	12	1	303	181.97	12	0	1.039	1.037	1.035	1.037	0.06	0.05	0.05	0.05	0.707849	0.9228	0.608858	0.907546	0.984024	0.995494	0.972699	0.995594	1.19789e+07	1.24464e+07	1.24183e+07	1.2883e+07	High	High	High	High	836
High	Master Protein	O88792	Junctional adhesion molecule A OS=Mus musculus OX=10090 GN=F11r PE=1 SV=2	0	51.012	25	7	13	7	1	300	33.12	7	0	1.039	1.096	1.096	1.039	0.06	0.13	0.13	0.06	0.372443	0.964631	0.574254	0.694122	0.922781	0.999773	0.969841	0.970324	1.4879e+06	1.54643e+06	1.63037e+06	1.69466e+06	High	High	High	High	837
High	Master Protein	Q64727	Vinculin OS=Mus musculus OX=10090 GN=Vcl PE=1 SV=4	0	711.344	82	89	338	89	1	1066	973.99	89	0	1.039	1.183	1.196	1.051	0.06	0.24	0.26	0.07	0.706195	0.272807	0.449813	0.97277	0.984024	0.846052	0.955524	0.999848	4.76346e+07	4.95053e+07	5.63429e+07	5.92043e+07	High	High	High	High	838
High	Master Protein	Q5NCE8	Magnesium transporter MRS2 homolog, mitochondrial OS=Mus musculus OX=10090 GN=Mrs2 PE=2 SV=2	0	52.55	31	11	19	11	1	434	46.32	11	0	1.039	0.995	1.056	1.102	0.05	-0.01	0.08	0.14	0.35548	0.411911	0.361502	0.558171	0.918483	0.91773	0.915503	0.965089	675541	701643	671947	740683	High	High	High	High	839
High	Master Protein	Q8JZS9	39S ribosomal protein L48, mitochondrial OS=Mus musculus OX=10090 GN=Mrpl48 PE=1 SV=1	0	10.02	10	3	7	3	1	211	14.3	3	0	1.039	0.994	1.067	1.116	0.06	-0.01	0.09	0.16	0.276716	0.403529	0.345619	0.431353	0.863992	0.913514	0.911286	0.924191	306575	318600	304811	340018	High	High	High	High	840
High	Master Protein	Q9D7B6	Isobutyryl-CoA dehydrogenase, mitochondrial OS=Mus musculus OX=10090 GN=Acad8 PE=1 SV=2	0	245.779	63	26	108	26	1	413	337.76	26	0	1.039	1.089	1.256	1.198	0.05	0.12	0.33	0.26	0.709638	0.729339	0.235555	0.418832	0.984263	0.98508	0.849196	0.920105	1.71195e+07	1.77831e+07	1.86375e+07	2.23364e+07	High	High	High	High	841
High	Master Protein	O35381	Acidic leucine-rich nuclear phosphoprotein 32 family member A OS=Mus musculus OX=10090 GN=Anp32a PE=1 SV=1	0	43.956	30	10	22	6	1	247	39.63	10	4	1.039	0.884	1.045	1.228	0.05	-0.18	0.06	0.3	0.373916	0.0119832	0.272054	0.0495407	0.922781	0.145855	0.867824	0.410069	1.468e+06	1.52466e+06	1.29771e+06	1.59324e+06	High	High	High	High	842
High	Master Protein	Q9CRB6	Tubulin polymerization-promoting protein family member 3 OS=Mus musculus OX=10090 GN=Tppp3 PE=1 SV=1	0.002	7.343	10	2	2	2	1	176	2.5	2	0	1.039	0.979	1.262	1.34	0.06	-0.03	0.34	0.42	0.27873	0.33142	0.467357	0.0171456	0.865044	0.896637	0.957326	0.20997	317855	330270	311029	416790	High	High	High	High	843
High	Master Protein	Q9JLT4	Thioredoxin reductase 2, mitochondrial OS=Mus musculus OX=10090 GN=Txnrd2 PE=1 SV=4	0	38.451	16	7	10	6	1	524	31.52	7	0	1.039	0.783	1.119	1.485	0.06	-0.35	0.16	0.57	0.345585	0.000934476	0.715767	0.00300874	0.914521	0.0182442	0.986902	0.0570092	711993	739997	557398	827737	High	High	High	High	844
High	Master Protein	P45377	Aldose reductase-related protein 2 OS=Mus musculus OX=10090 GN=Akr1b8 PE=1 SV=2	0	75.125	54	14	25	12	1	316	63.76	14	0	1.038	0.97	0.818	0.875	0.05	-0.04	-0.29	-0.19	0.333249	0.137437	0.0003127	0.239758	0.899426	0.665232	0.00808155	0.808586	2.76891e+06	2.87294e+06	2.68495e+06	2.34884e+06	High	High	High	High	845
High	Master Protein	Q8CIB5	Fermitin family homolog 2 OS=Mus musculus OX=10090 GN=Fermt2 PE=1 SV=1	0	188.718	41	27	66	26	1	680	209.4	27	1	1.038	1.215	1.076	0.919	0.05	0.28	0.11	-0.12	0.717564	0.198522	0.830588	0.379057	0.987376	0.763385	0.990777	0.908518	8.11652e+06	8.42162e+06	9.85965e+06	9.06302e+06	High	High	High	High	846
High	Master Protein	Q9CQ80	Vacuolar protein-sorting-associated protein 25 OS=Mus musculus OX=10090 GN=Vps25 PE=1 SV=1	0	43.792	43	10	15	10	1	176	39.62	10	0	1.038	1.095	1.056	1.001	0.05	0.13	0.08	0	0.332489	0.981647	0.332415	0.992574	0.899426	0.999773	0.910819	0.999848	1.84132e+06	1.91111e+06	2.01586e+06	2.01881e+06	High	High	High	High	847
High	Master Protein	P51175	Protoporphyrinogen oxidase OS=Mus musculus OX=10090 GN=Ppox PE=1 SV=1	0	54.855	40	12	15	12	1	477	30.41	12	0	1.038	1.114	1.077	1.003	0.05	0.16	0.11	0	0.348072	0.737693	0.450485	0.855322	0.914521	0.98508	0.955524	0.995594	733319	761201	816996	819737	High	High	High	High	848
High	Master Protein	Q9D1H8	39S ribosomal protein L53, mitochondrial OS=Mus musculus OX=10090 GN=Mrpl53 PE=1 SV=1	0	37.689	53	6	11	6	1	118	35.84	6	0	1.038	1.048	1.045	1.035	0.05	0.07	0.06	0.05	0.343807	0.79858	0.314417	0.919011	0.914521	0.990464	0.901141	0.997966	887477	921554	930350	963013	High	High	High	High	849
High	Master Protein	Q61301	Catenin alpha-2 OS=Mus musculus OX=10090 GN=Ctnna2 PE=1 SV=3	0	113.667	18	16	53	2	1	953	160.51	16	0	1.038	1.258	1.254	1.036	0.05	0.33	0.33	0.05	0.365466	0.453554	0.846602	0.782533	0.918957	0.930214	0.990777	0.986585	16298.8	16923.5	20497.4	21225.7	High	High	High	High	850
High	Master Protein	Q3UVL4	Vacuolar protein sorting-associated protein 51 homolog OS=Mus musculus OX=10090 GN=Vps51 PE=1 SV=2	0	43.42	16	10	10	10	1	782	21.9	10	0	1.038	1.093	1.101	1.046	0.05	0.13	0.14	0.07	0.348103	0.932152	0.600289	0.823207	0.914521	0.995494	0.970956	0.990603	719277	746923	786185	822637	High	High	High	High	851
High	Master Protein	Q9D0D3	Poly(A) RNA polymerase, mitochondrial OS=Mus musculus OX=10090 GN=Mtpap PE=1 SV=1	0	20.258	10	4	5	4	1	585	15.48	4	0	1.038	1.048	1.08	1.069	0.05	0.07	0.11	0.1	0.384742	0.711608	0.472299	0.597912	0.924161	0.98508	0.957561	0.96579	118726	123220	124484	133118	High	High	High	High	852
High	Master Protein	Q3UZ39	Leucine-rich repeat flightless-interacting protein 1 OS=Mus musculus OX=10090 GN=Lrrfip1 PE=1 SV=2	0	32.386	13	8	10	7	1	729	19.59	8	1	1.038	1.132	1.309	1.201	0.05	0.18	0.39	0.26	0.308493	0.735199	0.222209	0.16025	0.879507	0.98508	0.839054	0.708655	343939	357138	389420	467666	High	High	High	High	853
High	Master Protein	Q9R1C7	Pre-mRNA-processing factor 40 homolog A OS=Mus musculus OX=10090 GN=Prpf40a PE=1 SV=1	0	78.551	19	19	31	19	1	953	58.15	19	0	1.038	1.05	1.229	1.216	0.05	0.07	0.3	0.28	0.323382	0.629642	0.505457	0.0933899	0.895831	0.97492	0.957561	0.566883	2.31179e+06	2.40063e+06	2.42626e+06	2.9501e+06	High	High	High	High	854
High	Master Protein	O08600	Endonuclease G, mitochondrial OS=Mus musculus OX=10090 GN=Endog PE=1 SV=1	0	31.267	34	9	13	9	1	294	26.96	9	0	1.038	0.866	1.074	1.287	0.05	-0.21	0.1	0.36	0.355213	0.0289679	0.4552	0.0451878	0.918483	0.271393	0.956783	0.387946	786814	817000	681648	877421	High	High	High	High	855
High	Master Protein	P70195	Proteasome subunit beta type-7 OS=Mus musculus OX=10090 GN=Psmb7 PE=1 SV=1	0	29.997	19	6	10	6	1	277	20.28	6	0	1.038	0.94	1.222	1.348	0.05	-0.09	0.29	0.43	0.344933	0.165827	0.595094	0.0143334	0.914521	0.72214	0.970956	0.187364	682565	708399	641739	865367	High	High	High	High	856
High	Master Protein	Q9D2V8	Major facilitator superfamily domain-containing protein 10 OS=Mus musculus OX=10090 GN=Mfsd10 PE=1 SV=1	0	17.105	13	5	8	5	1	456	16.32	5	0	1.037	1.166	1.016	0.904	0.05	0.22	0.02	-0.15	0.345845	0.468693	0.18614	0.313004	0.914521	0.933246	0.782227	0.874528	625107	648381	728656	658718	High	High	High	High	857
High	Master Protein	Q3UH60	Disco-interacting protein 2 homolog B OS=Mus musculus OX=10090 GN=Dip2b PE=1 SV=1	0	13.374	2	3	4	2	1	1574	8.33	3	1	1.037	1.253	1.155	0.956	0.05	0.33	0.21	-0.07	0.312768	0.18242	0.904239	0.593945	0.886914	0.740027	0.991669	0.96579	346834	359563	434556	415317	High	High	High	High	858
High	Master Protein	Q08093	Calponin-2 OS=Mus musculus OX=10090 GN=Cnn2 PE=1 SV=1	0	27.235	23	7	13	5	1	305	25.46	7	0	1.037	1.369	1.344	1.018	0.05	0.45	0.43	0.03	0.307737	0.0371148	0.138132	0.996623	0.879507	0.316619	0.69185	0.999848	367967	381724	503865	513080	High	High	High	High	859
High	Master Protein	Q8K0D5	Elongation factor G, mitochondrial OS=Mus musculus OX=10090 GN=Gfm1 PE=1 SV=1	0	212.569	46	38	64	38	1	751	185.14	38	0	1.037	1.101	1.12	1.055	0.05	0.14	0.16	0.08	0.634723	0.775895	0.971342	0.86067	0.984024	0.987205	0.998629	0.995594	6.64885e+06	6.89154e+06	7.31874e+06	7.72168e+06	High	High	High	High	860
High	Master Protein	Q9D6J6	NADH dehydrogenase [ubiquinone] flavoprotein 2, mitochondrial OS=Mus musculus OX=10090 GN=Ndufv2 PE=1 SV=2	0	181.446	61	15	134	15	1	248	461.22	15	0	1.037	1.021	1.061	1.078	0.05	0.03	0.09	0.11	0.719456	0.814147	0.769625	0.895849	0.987376	0.991263	0.98925	0.995594	1.61591e+07	1.67621e+07	1.6498e+07	1.77882e+07	High	High	High	High	861
Medium	Master Protein	P58069	Ras GTPase-activating protein 2 OS=Mus musculus OX=10090 GN=Rasa2 PE=1 SV=2	0.011	3.886	3	2	2	2	1	847	2.2	2	0	1.037	0.992	1.06	1.108	0.05	-0.01	0.08	0.15	0.382116	0.360145	0.30353	0.418717	0.924147	0.900656	0.892218	0.920105	56792.3	58871.3	56311.4	62419.7	High	High	High	High	862
High	Master Protein	Q9Z1M8	Protein Red OS=Mus musculus OX=10090 GN=Ik PE=1 SV=2	0	37.565	20	10	12	10	1	557	22.49	10	0	1.037	1.077	1.222	1.177	0.05	0.11	0.29	0.24	0.363582	0.986888	0.592454	0.173867	0.918957	0.999773	0.970956	0.724716	788969	818138	849525	999984	High	High	High	High	863
High	Master Protein	Q9CQL4	39S ribosomal protein L20, mitochondrial OS=Mus musculus OX=10090 GN=Mrpl20 PE=1 SV=1	0	21.551	31	4	5	4	1	149	14.85	4	0	1.037	0.934	1.085	1.204	0.05	-0.1	0.12	0.27	0.388655	0.154363	0.502395	0.149643	0.92493	0.698354	0.957561	0.694156	89751.2	93033.2	83837.9	100932	High	High	High	High	864
High	Master Protein	Q9D8H7	Metalloendopeptidase OMA1, mitochondrial OS=Mus musculus OX=10090 GN=Oma1 PE=1 SV=1	0	15.428	6	2	4	2	1	521	12.78	2	0	1.036	1.044	1.008	1.001	0.05	0.06	0.01	0	0.382539	0.693957	0.210926	0.995202	0.924147	0.983552	0.826801	0.999848	128457	133108	134059	134226	High	High	High	High	865
High	Master Protein	Q8K0C4	Lanosterol 14-alpha demethylase OS=Mus musculus OX=10090 GN=Cyp51a1 PE=1 SV=1	0	126.004	39	19	53	19	1	503	150.08	19	0	1.036	1.081	1.042	0.998	0.05	0.11	0.06	0	0.406969	0.956073	0.396484	0.984755	0.932494	0.998445	0.932595	0.999848	4.03158e+06	4.17636e+06	4.35857e+06	4.35058e+06	High	High	High	High	866
High	Master Protein	Q7TPD0	Integrator complex subunit 3 OS=Mus musculus OX=10090 GN=Ints3 PE=1 SV=2	0	55.18	15	12	17	12	1	1041	37.71	12	0	1.036	1.169	1.174	1.041	0.05	0.23	0.23	0.06	0.339995	0.555229	0.883662	0.806944	0.908549	0.958912	0.990777	0.986585	490122	508006	572927	596472	High	High	High	High	867
High	Master Protein	Q3TZZ7	Extended synaptotagmin-2 OS=Mus musculus OX=10090 GN=Esyt2 PE=1 SV=1	0	134.408	37	23	42	23	1	845	108.39	23	0	1.036	1.054	1.093	1.074	0.05	0.08	0.13	0.1	0.389827	0.673936	0.551222	0.505693	0.92493	0.978969	0.964415	0.954916	1.61033e+06	1.66775e+06	1.69739e+06	1.82343e+06	High	High	High	High	868
High	Master Protein	O35083	1-acyl-sn-glycerol-3-phosphate acyltransferase alpha OS=Mus musculus OX=10090 GN=Agpat1 PE=1 SV=1	0	37.704	26	5	12	5	1	285	39.82	5	0	1.036	1.073	1.109	1.071	0.05	0.1	0.15	0.1	0.318131	0.868161	0.623338	0.665879	0.892559	0.995494	0.98077	0.970324	423168	438565	454115	486487	High	High	High	High	869
High	Master Protein	Q8VHK1	Caskin-2 OS=Mus musculus OX=10090 GN=Caskin2 PE=1 SV=3	0	13.129	3	3	4	2	1	1201	9.19	3	0	1.036	1	1.045	1.082	0.05	0	0.06	0.11	0.405401	0.400791	0.266118	0.534903	0.931501	0.912828	0.863956	0.962727	68744	71184.6	68716.8	74377.6	High	High	High	High	870
High	Master Protein	Q8CI78	Required for meiotic nuclear division protein 1 homolog OS=Mus musculus OX=10090 GN=Rmnd1 PE=1 SV=1	0	55.704	27	12	22	12	1	450	52.44	12	0	1.036	1.075	1.125	1.084	0.05	0.1	0.17	0.12	0.380819	0.91404	0.795118	0.510381	0.924147	0.995494	0.990777	0.954916	995773	1.03139e+06	1.07024e+06	1.15987e+06	High	High	High	High	871
High	Master Protein	Q99N80	Synaptotagmin-like protein 1 OS=Mus musculus OX=10090 GN=Sytl1 PE=1 SV=2	0	36.586	14	7	9	7	1	567	22.41	7	0	1.036	0.904	1	1.145	0.05	-0.15	0	0.2	0.315113	0.0983047	0.112195	0.323413	0.889208	0.565714	0.636499	0.880835	350790	363351	317074	363189	High	High	High	High	872
High	Master Protein	Q9CPY7	Cytosol aminopeptidase OS=Mus musculus OX=10090 GN=Lap3 PE=1 SV=3	0	237.152	60	26	68	26	1	519	220.03	26	0	1.036	0.986	1.12	1.177	0.05	-0.02	0.16	0.23	0.603575	0.425208	0.988987	0.29495	0.980314	0.921315	0.999985	0.863772	6.11484e+06	6.33733e+06	6.03172e+06	7.09759e+06	High	High	High	High	873
High	Master Protein	Q64096	Guanine nucleotide exchange factor DBS OS=Mus musculus OX=10090 GN=Mcf2l PE=1 SV=2	0.003	5.938	2	3	4	2	1	1149	6.24	3	0	1.036	1.24	1.41	1.177	0.05	0.31	0.5	0.24	0.385727	0.430954	0.22129	0.255176	0.924347	0.92385	0.838892	0.827598	32042.1	33184.5	39739.3	46778.7	High	High	High	High	874
High	Master Protein	Q9D0W5	Peptidyl-prolyl cis-trans isomerase-like 1 OS=Mus musculus OX=10090 GN=Ppil1 PE=1 SV=1	0	25.404	32	5	8	5	1	166	18.47	5	0	1.036	0.937	1.192	1.318	0.05	-0.09	0.25	0.4	0.364464	0.149008	0.761593	0.0291182	0.918957	0.687762	0.988083	0.297642	732980	759136	686855	904974	High	High	High	High	875
High	Master Protein	O35326	Serine/arginine-rich splicing factor 5 OS=Mus musculus OX=10090 GN=Srsf5 PE=1 SV=2	0	18.335	19	5	5	4	1	269	13.66	5	0	1.036	0.933	1.424	1.58	0.05	-0.1	0.51	0.66	0.353491	0.121394	0.0351226	2.92271e-05	0.918203	0.62502	0.332094	0.00106259	840960	870894	784701	1.23989e+06	High	High	High	High	876
High	Master Protein	Q05816	Fatty acid-binding protein 5 OS=Mus musculus OX=10090 GN=Fabp5 PE=1 SV=3	0	136.467	75	12	40	12	1	135	125.65	12	0	1.036	0.859	1.418	1.709	0.05	-0.22	0.5	0.77	0.381297	0.00403564	0.017564	5.80875e-06	0.924147	0.0627035	0.203505	0.000264914	3.85728e+06	3.99449e+06	3.31527e+06	5.66592e+06	High	High	High	High	877
High	Master Protein	Q8C0J2	Autophagy-related protein 16-1 OS=Mus musculus OX=10090 GN=Atg16l1 PE=1 SV=1	0	9.179	5	3	3	3	1	607	2.05	3	0	1.035	1.226	1.094	0.924	0.05	0.29	0.13	-0.11	0.366461	0.465563	0.404917	0.544312	0.920385	0.93185	0.938459	0.965089	36930.8	38233.5	45292.5	41846.5	High	High	High	High	878
High	Master Protein	Q8VDP6	CDP-diacylglycerol--inositol 3-phosphatidyltransferase OS=Mus musculus OX=10090 GN=Cdipt PE=1 SV=1	0	47.421	27	5	14	5	1	213	38.97	5	0	1.035	1.117	1.039	0.963	0.05	0.16	0.06	-0.05	0.402157	0.743811	0.272827	0.634304	0.931026	0.98508	0.867824	0.970324	1.36944e+06	1.41687e+06	1.52913e+06	1.47248e+06	High	High	High	High	879
High	Master Protein	Q9D2Y9	Elongation of very long chain fatty acids protein 7 OS=Mus musculus OX=10090 GN=Elovl7 PE=2 SV=1	0	20.535	9	3	14	3	1	281	33.01	3	0	1.035	1.085	1.035	0.986	0.05	0.12	0.05	-0.02	0.339109	0.943945	0.227273	0.871816	0.908549	0.995981	0.845195	0.995594	1.96071e+06	2.02887e+06	2.12783e+06	2.09897e+06	High	High	High	High	880
High	Master Protein	Q8BGB8	Ubiquinone biosynthesis protein COQ4 homolog, mitochondrial OS=Mus musculus OX=10090 GN=Coq4 PE=1 SV=1	0	38.589	26	6	13	6	1	266	32.4	6	0	1.035	1.097	1.078	1.017	0.05	0.13	0.11	0.02	0.35882	0.849296	0.475503	0.957227	0.918957	0.993839	0.957561	0.999848	837487	866595	918510	934251	High	High	High	High	881
High	Master Protein	O09167	60S ribosomal protein L21 OS=Mus musculus OX=10090 GN=Rpl21 PE=1 SV=4	0	56.117	47	9	27	9	1	160	71.72	9	0	1.035	1.251	1.229	1.016	0.05	0.32	0.3	0.02	0.481005	0.150357	0.373438	0.980519	0.950422	0.689986	0.91735	0.999848	5.20346e+06	5.38319e+06	6.5091e+06	6.61352e+06	High	High	High	High	882
High	Master Protein	P97313	DNA-dependent protein kinase catalytic subunit OS=Mus musculus OX=10090 GN=Prkdc PE=1 SV=3	0.002	6.424	1	3	3	3	1	4128	2.06	3	0	1.035	1.267	1.249	1.02	0.05	0.34	0.32	0.03	0.408671	0.185355	0.57477	0.912037	0.932494	0.741169	0.969841	0.997054	138078	142883	174983	178524	High	High	High	High	883
High	Master Protein	P61161	Actin-related protein 2 OS=Mus musculus OX=10090 GN=Actr2 PE=1 SV=1	0	157.686	35	15	75	14	1	394	228.37	15	0	1.035	1.072	1.122	1.083	0.05	0.1	0.17	0.12	0.737109	0.836942	0.842497	0.871513	0.992465	0.991263	0.990777	0.995594	1.08867e+07	1.12648e+07	1.16699e+07	1.26432e+07	High	High	High	High	884
High	Master Protein	Q99KJ8	Dynactin subunit 2 OS=Mus musculus OX=10090 GN=Dctn2 PE=1 SV=3	0	124.327	52	20	37	19	1	402	100.37	20	0	1.035	1.184	1.272	1.113	0.05	0.24	0.35	0.15	0.352912	0.318094	0.260427	0.331883	0.918203	0.8852	0.863956	0.882423	1.83393e+06	1.89896e+06	2.17102e+06	2.41624e+06	High	High	High	High	885
High	Master Protein	Q8C5H8	NAD kinase 2, mitochondrial OS=Mus musculus OX=10090 GN=Nadk2 PE=1 SV=2	0	37.254	22	7	8	7	1	452	16.4	7	0	1.035	0.997	1.14	1.183	0.05	0	0.19	0.24	0.388353	0.440398	0.784274	0.20634	0.92493	0.926837	0.990777	0.768856	128929	133428	128560	152048	High	High	High	High	886
High	Master Protein	Q80X19	Collagen alpha-1(XIV) chain OS=Mus musculus OX=10090 GN=Col14a1 PE=1 SV=2	0.001	8.366	2	2	2	2	1	1797	5.54	2	0	1.035	1.041	1.861	1.851	0.05	0.06	0.9	0.89	0.410856	0.603624	0.0125462	0.000123618	0.93275	0.97181	0.160718	0.00386607	8820.06	9126.36	9178.51	16986.8	High	High	High	High	887
High	Master Protein	Q9QXW9	Large neutral amino acids transporter small subunit 2 OS=Mus musculus OX=10090 GN=Slc7a8 PE=1 SV=1	0	10.627	3	2	4	2	1	531	11.38	2	0	1.034	1.17	1.01	0.893	0.05	0.23	0.01	-0.16	0.384944	0.361368	0.176111	0.197187	0.924161	0.901325	0.767193	0.757755	807710	834939	944687	843190	High	High	High	High	888
High	Master Protein	Q99J77	Sialic acid synthase OS=Mus musculus OX=10090 GN=Nans PE=1 SV=1	0	51.681	41	14	25	14	1	359	58.95	14	0	1.034	1.09	0.972	0.922	0.05	0.12	-0.04	-0.12	0.339936	0.982449	0.0713305	0.468569	0.908549	0.999773	0.50701	0.942688	2.33566e+06	2.41613e+06	2.54529e+06	2.34747e+06	High	High	High	High	889
High	Master Protein	P59481	VIP36-like protein OS=Mus musculus OX=10090 GN=Lman2l PE=1 SV=1	0.005	4.929	6	2	2	2	1	347	2.39	2	0	1.034	1.12	1.057	0.976	0.05	0.16	0.08	-0.03	0.365016	0.730917	0.358368	0.699781	0.918957	0.98508	0.915503	0.970324	683990	707476	765861	747854	High	High	High	High	890
High	Master Protein	P47802	Metaxin-1 OS=Mus musculus OX=10090 GN=Mtx1 PE=1 SV=1	0	93.716	38	13	43	13	1	317	111.15	13	0	1.034	1.064	1.014	0.985	0.05	0.09	0.02	-0.02	0.425968	0.842582	0.274382	0.917247	0.937159	0.992047	0.869023	0.997966	4.28303e+06	4.42811e+06	4.55855e+06	4.49215e+06	High	High	High	High	891
High	Master Protein	Q9DBY8	Nuclear valosin-containing protein-like OS=Mus musculus OX=10090 GN=Nvl PE=1 SV=1	0	22.806	10	6	6	6	1	855	13.47	6	0	1.034	1.097	1.051	0.991	0.05	0.13	0.07	-0.01	0.347472	0.938588	0.290327	0.836477	0.914521	0.995494	0.884554	0.993296	253515	262200	278051	275528	High	High	High	High	892
High	Master Protein	O70451	Monocarboxylate transporter 2 OS=Mus musculus OX=10090 GN=Slc16a7 PE=1 SV=1	0	48.105	15	7	16	7	1	484	42.75	7	0	1.034	1.191	1.155	1.002	0.05	0.25	0.21	0	0.36117	0.288344	0.975673	0.988219	0.918957	0.860125	0.999773	0.999848	1.84735e+06	1.90926e+06	2.19996e+06	2.20438e+06	High	High	High	High	893
High	Master Protein	P30999	Catenin delta-1 OS=Mus musculus OX=10090 GN=Ctnnd1 PE=1 SV=2	0	393.804	59	52	170	51	1	938	480.26	52	1	1.034	1.083	1.101	1.05	0.05	0.12	0.14	0.07	0.745461	0.76401	0.977258	0.970568	0.992465	0.987135	0.999773	0.999848	1.36922e+07	1.41511e+07	1.48311e+07	1.55776e+07	High	High	High	High	894
High	Master Protein	Q9CQR2	40S ribosomal protein S21 OS=Mus musculus OX=10090 GN=Rps21 PE=1 SV=1	0	13.308	41	5	6	5	1	83	11.34	5	0	1.034	1.017	1.039	1.055	0.05	0.02	0.05	0.08	0.353585	0.354054	0.366953	0.638637	0.918203	0.897776	0.91735	0.970324	2.99914e+06	3.09968e+06	3.05134e+06	3.21975e+06	High	High	High	High	895
High	Master Protein	Q9CZ83	39S ribosomal protein L55, mitochondrial OS=Mus musculus OX=10090 GN=Mrpl55 PE=1 SV=1	0	15.755	43	5	7	5	1	127	11.69	5	0	1.034	1.077	1.117	1.072	0.05	0.11	0.16	0.1	0.353414	0.934222	0.63676	0.691017	0.918203	0.995494	0.982252	0.970324	235170	243187	253385	271755	High	High	High	High	896
High	Master Protein	Q811I0	ATP synthase mitochondrial F1 complex assembly factor 1 OS=Mus musculus OX=10090 GN=Atpaf1 PE=1 SV=1	0	25.38	21	7	8	7	1	324	13.04	7	0	1.034	1.181	1.232	1.078	0.05	0.24	0.3	0.11	0.350651	0.444511	0.522623	0.613801	0.917403	0.927938	0.960627	0.96579	503945	520867	594963	641645	High	High	High	High	897
High	Master Protein	Q9D6U8	Protein FAM162A OS=Mus musculus OX=10090 GN=Fam162a PE=1 SV=1	0	55.548	32	6	29	6	1	155	79.54	6	0	1.034	1.001	1.06	1.094	0.05	0	0.08	0.13	0.424765	0.407426	0.517936	0.477936	0.936886	0.915596	0.959851	0.944206	4.67301e+06	4.83027e+06	4.67797e+06	5.1178e+06	High	High	High	High	898
High	Master Protein	Q810B6	Rabankyrin-5 OS=Mus musculus OX=10090 GN=Ankfy1 PE=1 SV=2	0	169.727	30	30	47	29	1	1169	128.41	30	1	1.034	1.065	1.157	1.123	0.05	0.09	0.21	0.17	0.682547	0.992498	0.69015	0.62814	0.984024	0.999773	0.986902	0.968078	7.14299e+06	7.38483e+06	7.60899e+06	8.54626e+06	High	High	High	High	899
High	Master Protein	Q91YP3	Deoxyribose-phosphate aldolase OS=Mus musculus OX=10090 GN=Dera PE=1 SV=1	0	37.499	34	9	11	9	1	318	21.36	9	0	1.033	1.392	1.006	0.746	0.05	0.48	0.01	-0.42	0.371497	0.00616684	0.157001	0.00271351	0.922781	0.087296	0.732125	0.0526149	842302	869927	1.17273e+06	874872	High	High	High	High	900
High	Master Protein	P97930	Thymidylate kinase OS=Mus musculus OX=10090 GN=Dtymk PE=1 SV=2	0	49.617	56	13	16	13	1	212	48.1	13	0	1.033	1.344	1.053	0.809	0.05	0.43	0.07	-0.31	0.366628	0.0117302	0.432584	0.0704146	0.920385	0.144284	0.951745	0.495286	2.9236e+06	3.01931e+06	3.92878e+06	3.17961e+06	High	High	High	High	901
High	Master Protein	Q3UUI3	Acyl-coenzyme A thioesterase THEM4 OS=Mus musculus OX=10090 GN=Them4 PE=1 SV=1	0	13.923	14	3	5	3	1	230	13.04	3	0	1.033	1.258	1.147	0.941	0.05	0.33	0.2	-0.09	0.359339	0.171507	0.806382	0.478934	0.918957	0.728973	0.990777	0.944206	274773	283722	345616	325377	High	High	High	High	902
High	Master Protein	O88441	Metaxin-2 OS=Mus musculus OX=10090 GN=Mtx2 PE=1 SV=1	0	136.105	44	10	45	10	1	263	138.39	10	0	1.033	1.003	0.96	0.988	0.05	0	-0.06	-0.02	0.666132	0.604189	0.13776	0.853132	0.984024	0.97181	0.691703	0.995594	6.78706e+06	7.01102e+06	6.81009e+06	6.72966e+06	High	High	High	High	903
High	Master Protein	O88307	Sortilin-related receptor OS=Mus musculus OX=10090 GN=Sorl1 PE=1 SV=3	0	134.729	15	29	34	29	1	2215	95.98	29	0	1.033	1.116	1.085	1.005	0.05	0.16	0.12	0.01	0.362192	0.803791	0.661988	0.951028	0.918957	0.990901	0.985087	0.999848	3.10663e+06	3.20952e+06	3.46736e+06	3.48297e+06	High	High	High	High	904
High	Master Protein	Q8VH51	RNA-binding protein 39 OS=Mus musculus OX=10090 GN=Rbm39 PE=1 SV=2	0	70.877	28	12	22	12	1	530	60.96	12	0	1.033	1.096	1.12	1.055	0.05	0.13	0.16	0.08	0.396467	0.955311	0.750554	0.618635	0.930154	0.998445	0.986902	0.96579	1.63124e+06	1.68517e+06	1.78846e+06	1.88708e+06	High	High	High	High	905
High	Master Protein	Q8BMD8	Calcium-binding mitochondrial carrier protein SCaMC-1 OS=Mus musculus OX=10090 GN=Slc25a24 PE=1 SV=1	0	104.81	40	19	38	19	1	475	108.17	19	0	1.033	0.972	1.004	1.067	0.05	-0.04	0.01	0.09	0.604943	0.328682	0.26773	0.66271	0.980314	0.894624	0.863956	0.970324	6.00028e+06	6.19825e+06	5.83304e+06	6.22286e+06	High	High	High	High	906
High	Master Protein	Q2TPA8	Hydroxysteroid dehydrogenase-like protein 2 OS=Mus musculus OX=10090 GN=Hsdl2 PE=1 SV=1	0	160.627	56	22	47	22	1	490	129.28	22	0	1.033	1.083	1.14	1.089	0.05	0.11	0.19	0.12	0.422723	0.976108	0.901088	0.502353	0.936594	0.999773	0.991669	0.953406	4.64753e+06	4.80247e+06	5.03115e+06	5.477e+06	High	High	High	High	907
High	Master Protein	E9Q557	Desmoplakin OS=Mus musculus OX=10090 GN=Dsp PE=1 SV=1	0	1507.15	69	240	623	239	1	2883	1678.29	240	1	1.033	1.168	1.258	1.113	0.05	0.22	0.33	0.15	0.747966	0.326951	0.230194	0.737839	0.992465	0.894005	0.845195	0.977575	6.83106e+07	7.05753e+07	7.97667e+07	8.87842e+07	High	High	High	High	908
High	Master Protein	O08738	Caspase-6 OS=Mus musculus OX=10090 GN=Casp6 PE=1 SV=1	0	64.438	48	13	24	12	1	276	61.58	13	0	1.033	1.053	1.167	1.145	0.05	0.07	0.22	0.2	0.348035	0.657487	0.883541	0.249618	0.914521	0.97492	0.990777	0.821284	1.9579e+06	2.02332e+06	2.06176e+06	2.3603e+06	High	High	High	High	909
High	Master Protein	Q60864	Stress-induced-phosphoprotein 1 OS=Mus musculus OX=10090 GN=Stip1 PE=1 SV=1	0	88.729	42	21	31	21	1	543	77.83	21	0	1.033	1.114	1.316	1.22	0.05	0.16	0.4	0.29	0.353026	0.799621	0.126841	0.0836426	0.918203	0.990464	0.670526	0.538218	3.16784e+06	3.27088e+06	3.52742e+06	4.30339e+06	High	High	High	High	910
High	Master Protein	Q3TC93	HCLS1-binding protein 3 OS=Mus musculus OX=10090 GN=Hs1bp3 PE=1 SV=2	0	10.295	8	2	2	2	1	395	7.25	2	0	1.033	0.997	1.198	1.24	0.05	0	0.26	0.31	0.436462	0.39967	0.917213	0.0978567	0.940688	0.912828	0.991669	0.576583	75715.8	78198.3	75502.3	93651.5	High	High	High	High	911
High	Master Protein	P58252	Elongation factor 2 OS=Mus musculus OX=10090 GN=Eef2 PE=1 SV=2	0	515.87	63	56	318	55	1	858	945.1	56	1	1.032	1.478	1.153	0.806	0.05	0.56	0.21	-0.31	0.756157	0.00186598	0.660809	0.082441	0.994644	0.0325038	0.985087	0.53403	6.48771e+07	6.69513e+07	9.58648e+07	7.72281e+07	High	High	High	High	912
High	Master Protein	Q3U2P1	Protein transport protein Sec24A OS=Mus musculus OX=10090 GN=Sec24a PE=1 SV=1	0	61.492	14	13	18	13	1	1090	43.27	13	0	1.032	1.198	0.998	0.859	0.05	0.26	0	-0.22	0.400516	0.31858	0.133662	0.159129	0.931026	0.8852	0.684689	0.706903	605643	625208	725790	623650	High	High	High	High	913
High	Master Protein	Q91V04	Translocating chain-associated membrane protein 1 OS=Mus musculus OX=10090 GN=Tram1 PE=1 SV=3	0	80.63	25	10	32	10	1	374	97.61	10	0	1.032	1	0.917	0.947	0.05	0	-0.13	-0.08	0.668836	0.576985	0.0468929	0.631643	0.984024	0.965076	0.39462	0.968946	6.76687e+06	6.98491e+06	6.7636e+06	6.40505e+06	High	High	High	High	914
High	Master Protein	Q9CRD2	ER membrane protein complex subunit 2 OS=Mus musculus OX=10090 GN=Emc2 PE=1 SV=1	0	53.519	27	10	17	10	1	297	48.3	10	0	1.032	1.061	1.008	0.981	0.05	0.09	0.01	-0.03	0.372815	0.687647	0.175807	0.893299	0.922781	0.982711	0.767193	0.995594	2.63748e+06	2.72311e+06	2.79845e+06	2.74612e+06	High	High	High	High	915
High	Master Protein	Q921L3	Calcium load-activated calcium channel OS=Mus musculus OX=10090 GN=Tmco1 PE=1 SV=1	0	25.168	29	6	10	6	1	188	27.54	6	0	1.032	1.089	1.031	0.977	0.05	0.12	0.04	-0.03	0.363142	0.97341	0.335826	0.855048	0.918957	0.999773	0.911286	0.995594	3.10941e+06	3.21034e+06	3.3875e+06	3.31023e+06	High	High	High	High	916
High	Master Protein	Q5SS80	Dehydrogenase/reductase SDR family member 13 OS=Mus musculus OX=10090 GN=Dhrs13 PE=1 SV=1	0	15.452	11	5	5	5	1	376	10.89	5	0	1.032	1.193	1.142	0.989	0.05	0.25	0.19	-0.02	0.382599	0.403254	0.807093	0.827379	0.924147	0.913514	0.990777	0.991321	178836	184633	213286	210841	High	High	High	High	917
High	Master Protein	Q9WTI7	Unconventional myosin-Ic OS=Mus musculus OX=10090 GN=Myo1c PE=1 SV=2	0	248.904	43	44	99	43	1	1063	300.21	44	0	1.032	1.074	1.06	1.019	0.05	0.1	0.08	0.03	0.751678	0.90515	0.679903	0.869298	0.994259	0.995494	0.986902	0.995594	7.76724e+06	8.01893e+06	8.34033e+06	8.49717e+06	High	High	High	High	918
Medium	Master Protein	Q8R2Y9	SOSS complex subunit B1 OS=Mus musculus OX=10090 GN=Nabp2 PE=1 SV=1	0.016	3.389	7	2	2	2	1	212	1.84	2	0	1.032	1.261	1.264	1.035	0.05	0.33	0.34	0.05	0.362554	0.164537	0.467283	0.895902	0.918957	0.72084	0.957326	0.995594	276405	285263	348494	360700	High	High	High	High	919
High	Master Protein	Q78IK4	MICOS complex subunit Mic27 OS=Mus musculus OX=10090 GN=Apool PE=1 SV=1	0	224.005	77	19	95	19	1	265	281.91	19	0	1.032	1.009	1.03	1.053	0.05	0.01	0.04	0.07	0.756529	0.735468	0.579481	0.983631	0.994644	0.98508	0.970956	0.999848	1.67172e+07	1.72507e+07	1.6875e+07	1.77697e+07	High	High	High	High	920
High	Master Protein	Q8BGY7	Protein FAM210A OS=Mus musculus OX=10090 GN=Fam210a PE=1 SV=1	0	51.019	27	7	14	7	1	273	36.69	7	0	1.032	0.958	0.981	1.056	0.05	-0.06	-0.03	0.08	0.417937	0.122056	0.0652368	0.656091	0.935565	0.626212	0.480495	0.970324	1.58009e+06	1.63101e+06	1.51385e+06	1.59931e+06	High	High	High	High	921
High	Master Protein	Q99LG1	Transmembrane protein 51 OS=Mus musculus OX=10090 GN=Tmem51 PE=1 SV=1	0.002	6.28	14	3	3	3	1	249	2.65	3	0	1.032	1.035	1.086	1.083	0.05	0.05	0.12	0.11	0.421667	0.638342	0.482994	0.580084	0.936074	0.97492	0.957561	0.96579	135662	139969	140386	152011	High	High	High	High	922
High	Master Protein	Q99N89	39S ribosomal protein L43, mitochondrial OS=Mus musculus OX=10090 GN=Mrpl43 PE=1 SV=1	0	9.374	14	3	5	3	1	183	11.2	3	0	1.032	1.042	1.112	1.102	0.05	0.06	0.15	0.14	0.390322	0.640858	0.666459	0.490057	0.92493	0.97492	0.986616	0.950054	560958	578899	584251	643561	High	High	High	High	923
High	Master Protein	Q99KK9	Histidine--tRNA ligase, mitochondrial OS=Mus musculus OX=10090 GN=Hars2 PE=1 SV=1	0	64.336	29	14	22	11	1	505	61.07	14	0	1.032	1.03	1.113	1.116	0.05	0.04	0.15	0.16	0.416186	0.524197	0.698057	0.323839	0.935565	0.951102	0.986902	0.880835	1.44406e+06	1.49026e+06	1.48691e+06	1.65905e+06	High	High	High	High	924
High	Master Protein	Q99PV0	Pre-mRNA-processing-splicing factor 8 OS=Mus musculus OX=10090 GN=Prpf8 PE=1 SV=2	0	358.784	34	73	118	72	1	2335	336.24	73	0	1.032	1.064	1.156	1.122	0.05	0.09	0.21	0.17	0.755299	0.890856	0.645363	0.700297	0.994644	0.995494	0.983219	0.970324	1.02322e+07	1.05606e+07	1.08855e+07	1.22114e+07	High	High	High	High	925
High	Master Protein	Q7TQG1	Pleckstrin homology domain-containing family A member 6 OS=Mus musculus OX=10090 GN=Plekha6 PE=1 SV=1	0	79.744	19	22	27	22	1	1173	61.3	22	0	1.032	1.185	1.308	1.138	0.05	0.25	0.39	0.19	0.356526	0.317648	0.162755	0.269866	0.918483	0.885095	0.74491	0.845713	1.92702e+06	1.98867e+06	2.28425e+06	2.60037e+06	High	High	High	High	926
High	Master Protein	Q9D6Y7	Mitochondrial peptide methionine sulfoxide reductase OS=Mus musculus OX=10090 GN=Msra PE=1 SV=1	0	100.854	68	14	34	14	1	233	105.47	14	0	1.032	0.858	1.096	1.318	0.04	-0.22	0.13	0.4	0.355458	0.00226211	0.732781	0.0148263	0.918483	0.0383702	0.986902	0.190815	3.24826e+06	3.35067e+06	2.78612e+06	3.67126e+06	High	High	High	High	927
High	Master Protein	Q80YV4	4'-phosphopantetheine phosphatase OS=Mus musculus OX=10090 GN=Pank4 PE=1 SV=2	0.001	8.431	3	4	7	3	1	820	9.71	4	0	1.031	1.318	1.174	0.919	0.04	0.4	0.23	-0.12	0.423249	0.0855523	0.980951	0.457681	0.936618	0.525744	0.999773	0.935831	147677	152313	194685	178882	High	High	High	High	928
High	Master Protein	E9Q735	Ubiquitin conjugation factor E4 A OS=Mus musculus OX=10090 GN=Ube4a PE=1 SV=1	0	31.677	9	8	8	8	1	1028	21.93	8	0	1.031	1.454	1.297	0.92	0.04	0.54	0.38	-0.12	0.408961	0.00704029	0.331794	0.391021	0.932494	0.0966047	0.910819	0.920105	161230	166296	234408	215723	High	High	High	High	929
High	Master Protein	Q91W34	RUS family member 1 OS=Mus musculus OX=10090 GN=Rusf1 PE=1 SV=1	0	30.984	17	7	10	7	1	466	21.2	7	0	1.031	1.174	1.061	0.931	0.04	0.23	0.09	-0.1	0.374337	0.525867	0.338197	0.482009	0.923197	0.951632	0.911286	0.945882	482492	497452	566590	527642	High	High	High	High	930
High	Master Protein	Q6NS46	Protein RRP5 homolog OS=Mus musculus OX=10090 GN=Pdcd11 PE=1 SV=2	0	89.073	15	22	25	22	1	1862	53.33	22	0	1.031	1.152	1.082	0.969	0.04	0.2	0.11	-0.05	0.392375	0.526669	0.479278	0.744112	0.927269	0.95201	0.957561	0.977575	1.77935e+06	1.83504e+06	2.04951e+06	1.98513e+06	High	High	High	High	931
High	Master Protein	Q5SSI6	U3 small nucleolar RNA-associated protein 18 homolog OS=Mus musculus OX=10090 GN=Utp18 PE=1 SV=1	0	21.623	7	4	4	4	1	552	12.86	4	0	1.031	1.342	1.26	0.968	0.04	0.42	0.33	-0.05	0.41785	0.0661746	0.553444	0.776739	0.935565	0.459255	0.964415	0.986585	121486	125244	163081	157798	High	High	High	High	932
High	Master Protein	Q6DFW4	Nucleolar protein 58 OS=Mus musculus OX=10090 GN=Nop58 PE=1 SV=1	0	184.39	41	20	62	20	1	536	169.21	20	0	1.031	1.156	1.121	1.001	0.04	0.21	0.17	0	0.591889	0.508834	0.995107	0.91988	0.975827	0.94521	0.999985	0.997966	5.87315e+06	6.0574e+06	6.78774e+06	6.7921e+06	High	High	High	High	933
High	Master Protein	Q9CR76	Transmembrane protein 186 OS=Mus musculus OX=10090 GN=Tmem186 PE=1 SV=2	0	28.817	28	6	8	6	1	216	18.95	6	0	1.031	1.07	1.057	1.019	0.04	0.1	0.08	0.03	0.3604	0.819426	0.340566	0.961414	0.918957	0.991263	0.911286	0.999848	512761	528696	548454	559091	High	High	High	High	934
High	Master Protein	Q91WS0	CDGSH iron-sulfur domain-containing protein 1 OS=Mus musculus OX=10090 GN=Cisd1 PE=1 SV=1	0	98.714	54	8	50	8	1	108	191.46	8	0	1.031	1.115	1.116	1.033	0.04	0.16	0.16	0.05	0.760346	0.576479	0.878627	0.886757	0.994644	0.965076	0.990777	0.995594	8.74322e+06	9.01748e+06	9.74467e+06	1.0068e+07	High	High	High	High	935
High	Master Protein	Q8VE95	UPF0598 protein C8orf82 homolog OS=Mus musculus OX=10090 PE=1 SV=1	0	39.736	46	7	10	7	1	218	32.38	7	0	1.031	1.142	1.148	1.036	0.04	0.19	0.2	0.05	0.404129	0.638278	0.936794	0.902097	0.931501	0.97492	0.994711	0.995594	568894	586315	649958	673249	High	High	High	High	936
High	Master Protein	Q8BW75	Amine oxidase [flavin-containing] B OS=Mus musculus OX=10090 GN=Maob PE=1 SV=4	0	156.386	51	23	69	20	1	520	196.48	23	3	1.031	1.035	1.05	1.046	0.04	0.05	0.07	0.06	0.760179	0.912249	0.697507	0.94886	0.994644	0.995494	0.986902	0.999848	1.07894e+07	1.11281e+07	1.11687e+07	1.16811e+07	High	High	High	High	937
High	Master Protein	P70280	Vesicle-associated membrane protein 7 OS=Mus musculus OX=10090 GN=Vamp7 PE=1 SV=1	0	36.951	31	5	9	5	1	220	28.37	5	0	1.031	1.125	1.158	1.061	0.04	0.17	0.21	0.09	0.398726	0.653276	0.995451	0.743948	0.931026	0.97492	0.999985	0.977575	823578	848757	926120	983063	High	High	High	High	938
High	Master Protein	Q8BIP0	Aspartate--tRNA ligase, mitochondrial OS=Mus musculus OX=10090 GN=Dars2 PE=1 SV=1	0	23.65	12	8	9	8	1	653	17.79	8	0	1.031	1.041	1.097	1.086	0.04	0.06	0.13	0.12	0.401553	0.688615	0.59135	0.601162	0.931026	0.982916	0.970956	0.96579	675444	696420	703206	763887	High	High	High	High	939
High	Master Protein	P26231	Catenin alpha-1 OS=Mus musculus OX=10090 GN=Ctnna1 PE=1 SV=1	0	738.371	70	68	295	54	1	906	980.64	68	14	1.031	1.107	1.182	1.101	0.04	0.15	0.24	0.14	0.764206	0.619789	0.514519	0.792732	0.994644	0.97492	0.959125	0.986585	3.88762e+07	4.00742e+07	4.30315e+07	4.73613e+07	High	High	High	High	940
High	Master Protein	Q9WVA3	Mitotic checkpoint protein BUB3 OS=Mus musculus OX=10090 GN=Bub3 PE=1 SV=2	0	22.33	21	5	6	5	1	326	17.41	5	0	1.031	1.105	1.199	1.118	0.04	0.14	0.26	0.16	0.405066	0.964749	0.830545	0.37504	0.931501	0.999773	0.990777	0.90448	105762	109062	116915	130712	High	High	High	High	941
High	Master Protein	Q9QZ08	N-acetyl-D-glucosamine kinase OS=Mus musculus OX=10090 GN=Nagk PE=1 SV=3	0	15.588	12	3	3	3	1	343	7.22	3	0	1.031	0.921	1.004	1.124	0.04	-0.12	0.01	0.17	0.405422	0.129463	0.132071	0.363613	0.931501	0.646825	0.681856	0.897005	60172.7	62052	55435.1	62328	High	High	High	High	942
High	Master Protein	Q8R3V5	Endophilin-B2 OS=Mus musculus OX=10090 GN=Sh3glb2 PE=1 SV=2	0	31.936	20	8	12	7	1	400	27.96	8	0	1.031	1.104	1.204	1.124	0.04	0.14	0.27	0.17	0.376547	0.962042	0.65965	0.400336	0.924147	0.998445	0.985087	0.920105	475388	489939	524719	589965	High	High	High	High	943
High	Master Protein	Q9CR68	Cytochrome b-c1 complex subunit Rieske, mitochondrial OS=Mus musculus OX=10090 GN=Uqcrfs1 PE=1 SV=1	0	208.857	51	16	110	16	1	274	366.64	16	0	1.031	0.976	1.078	1.139	0.04	-0.03	0.11	0.19	0.762209	0.522252	0.878409	0.630405	0.994644	0.950708	0.990777	0.968929	3.41222e+07	3.51834e+07	3.33139e+07	3.79372e+07	High	High	High	High	944
High	Master Protein	P01867	Immunoglobulin heavy constant gamma 2B OS=Mus musculus OX=10090 GN=Ighg2b PE=1 SV=3	0.003	5.533	4	2	2	2	1	404	5.02	2	0	1.031	0.976	1.383	1.462	0.04	-0.04	0.47	0.55	0.386475	0.318623	0.0977443	0.0014924	0.92493	0.8852	0.598215	0.0320344	205040	211374	200022	292417	High	High	High	High	945
High	Master Protein	Q9D4J7	PHD finger protein 6 OS=Mus musculus OX=10090 GN=Phf6 PE=1 SV=1	0.002	6.624	9	3	3	3	1	364	4.99	3	0	1.03	1.167	0.996	0.879	0.04	0.22	-0.01	-0.19	0.422135	0.573448	0.167357	0.336624	0.936074	0.965076	0.750333	0.883239	120984	124661	141237	124133	High	High	High	High	946
High	Master Protein	Q9CRC8	Leucine-rich repeat-containing protein 40 OS=Mus musculus OX=10090 GN=Lrrc40 PE=1 SV=2	0	41.954	23	12	15	12	1	602	33.5	12	0	1.03	1.229	1.09	0.913	0.04	0.3	0.12	-0.13	0.422253	0.149695	0.548381	0.293886	0.936074	0.689128	0.964415	0.862782	766633	789385	942293	860553	High	High	High	High	947
High	Master Protein	P41216	Long-chain-fatty-acid--CoA ligase 1 OS=Mus musculus OX=10090 GN=Acsl1 PE=1 SV=2	0	448.93	59	44	203	41	1	699	656.47	44	3	1.03	1.016	0.999	1.013	0.04	0.02	0	0.02	0.76878	0.782142	0.409953	0.785702	0.994644	0.988107	0.940644	0.986585	5.36133e+07	5.52303e+07	5.44875e+07	5.51691e+07	High	High	High	High	948
High	Master Protein	P97478	5-demethoxyubiquinone hydroxylase, mitochondrial OS=Mus musculus OX=10090 GN=Coq7 PE=1 SV=3	0	41.588	50	7	14	7	1	217	29.48	7	0	1.03	0.997	1.004	1.037	0.04	0	0.01	0.05	0.429413	0.296895	0.14781	0.833453	0.938491	0.86888	0.71837	0.992873	1.24876e+06	1.28615e+06	1.24487e+06	1.29087e+06	High	High	High	High	949
High	Master Protein	Q80UP5	Ankyrin repeat domain-containing protein 13A OS=Mus musculus OX=10090 GN=Ankrd13a PE=1 SV=2	0	13.164	6	3	4	3	1	588	9.71	3	0	1.03	1.028	1.032	1.033	0.04	0.04	0.05	0.05	0.417652	0.59457	0.282117	0.796404	0.935565	0.968917	0.873913	0.986585	116344	119808	119632	123610	High	High	High	High	950
High	Master Protein	P56379	ATP synthase subunit ATP5MPL, mitochondrial OS=Mus musculus OX=10090 GN=Atp5mpl PE=1 SV=1	0	25.941	34	3	14	3	1	58	42.9	3	0	1.03	0.975	0.998	1.055	0.04	-0.04	0	0.08	0.769184	0.513577	0.407118	0.99268	0.994644	0.949473	0.939558	0.999848	1.17023e+07	1.20545e+07	1.14081e+07	1.20343e+07	High	High	High	High	951
High	Master Protein	Q8BJZ4	28S ribosomal protein S35, mitochondrial OS=Mus musculus OX=10090 GN=Mrps35 PE=1 SV=2	0	74.16	44	11	22	11	1	320	62.94	11	0	1.03	1.044	1.083	1.068	0.04	0.06	0.11	0.09	0.433308	0.636406	0.49235	0.62224	0.939353	0.97492	0.957561	0.96579	1.40272e+06	1.44444e+06	1.46498e+06	1.56389e+06	High	High	High	High	952
High	Master Protein	Q80TH2	Erbin OS=Mus musculus OX=10090 GN=Erbin PE=1 SV=3	0	54.952	13	16	17	16	1	1402	38.38	16	0	1.03	1.105	1.143	1.066	0.04	0.14	0.19	0.09	0.418894	0.854099	0.938779	0.631467	0.935565	0.993984	0.994962	0.968946	1.32867e+06	1.369e+06	1.46863e+06	1.56537e+06	High	High	High	High	953
High	Master Protein	O35465	Peptidyl-prolyl cis-trans isomerase FKBP8 OS=Mus musculus OX=10090 GN=Fkbp8 PE=1 SV=2	0	94.692	38	14	31	14	1	402	99.21	14	0	1.03	1.005	1.048	1.074	0.04	0.01	0.07	0.1	0.431786	0.346104	0.431707	0.528718	0.939353	0.896637	0.9509	0.959216	3.96132e+06	4.07989e+06	3.98188e+06	4.27723e+06	High	High	High	High	954
High	Master Protein	Q64520	Guanylate kinase OS=Mus musculus OX=10090 GN=Guk1 PE=1 SV=2	0	31.17	35	5	7	5	1	198	20.82	5	0	1.03	1.035	1.093	1.088	0.04	0.05	0.13	0.12	0.402499	0.657569	0.562039	0.5292	0.931026	0.97492	0.96751	0.959216	800459	824727	828647	901457	High	High	High	High	955
High	Master Protein	Q05920	Pyruvate carboxylase, mitochondrial OS=Mus musculus OX=10090 GN=Pc PE=1 SV=1	0	666.392	62	68	317	67	1	1178	1020.88	68	0	1.03	1.005	1.101	1.128	0.04	0.01	0.14	0.17	0.77021	0.703331	0.979084	0.6734	0.994644	0.98508	0.999773	0.970324	6.16192e+07	6.3465e+07	6.19064e+07	6.98443e+07	High	High	High	High	956
High	Master Protein	Q99M31	Heat shock 70 kDa protein 14 OS=Mus musculus OX=10090 GN=Hspa14 PE=1 SV=2	0	39.855	20	10	11	10	1	509	22.02	10	0	1.029	1.452	1.1	0.779	0.04	0.54	0.14	-0.36	0.405031	0.00115339	0.611083	0.00995457	0.931501	0.0213708	0.97405	0.146618	690196	709972	1.00191e+06	780687	High	High	High	High	957
High	Master Protein	Q62018	RNA polymerase-associated protein CTR9 homolog OS=Mus musculus OX=10090 GN=Ctr9 PE=1 SV=2	0	26.814	7	7	7	7	1	1173	20.52	7	0	1.029	1.211	1.079	0.917	0.04	0.28	0.11	-0.13	0.381311	0.31129	0.412024	0.366159	0.924147	0.876061	0.941175	0.899092	276007	283948	334250	306447	High	High	High	High	958
High	Master Protein	Q9D0T1	NHP2-like protein 1 OS=Mus musculus OX=10090 GN=Snu13 PE=1 SV=4	0	76.394	53	9	27	9	1	128	73.63	9	0	1.029	1.152	1.027	0.917	0.04	0.2	0.04	-0.12	0.780295	0.439499	0.475597	0.374012	0.994644	0.926815	0.957561	0.903966	7.83743e+06	8.06094e+06	9.02637e+06	8.27909e+06	High	High	High	High	959
High	Master Protein	P22315	Ferrochelatase, mitochondrial OS=Mus musculus OX=10090 GN=Fech PE=1 SV=3	0	112.472	60	22	42	22	1	422	108.94	22	0	1.029	1.045	0.989	0.973	0.04	0.06	-0.02	-0.04	0.454825	0.721659	0.186606	0.824333	0.949825	0.98508	0.782889	0.990603	4.645e+06	4.77849e+06	4.85469e+06	4.72515e+06	High	High	High	High	960
High	Master Protein	Q78JW9	Ubiquitin domain-containing protein UBFD1 OS=Mus musculus OX=10090 GN=Ubfd1 PE=1 SV=2	0.002	6.313	8	2	2	2	1	368	5.54	2	0	1.029	1.153	1.137	1.015	0.04	0.2	0.18	0.02	0.423442	0.630145	0.762496	0.946109	0.936618	0.97492	0.988083	0.999848	132629	136462	152857	155115	High	High	High	High	961
High	Master Protein	Q8BY71	Histone acetyltransferase type B catalytic subunit OS=Mus musculus OX=10090 GN=Hat1 PE=1 SV=1	0	17.127	12	4	5	4	1	416	8	4	0	1.029	1.394	1.387	1.023	0.04	0.48	0.47	0.03	0.419203	0.0312251	0.154048	0.91065	0.935565	0.280351	0.72947	0.996848	129956	133691	181209	185394	High	High	High	High	962
High	Master Protein	E9Q236	ATP-binding cassette sub-family C member 4 OS=Mus musculus OX=10090 GN=Abcc4 PE=1 SV=1	0.004	5.43	2	2	2	2	1	1325	5.35	2	0	1.029	1.099	1.113	1.042	0.04	0.14	0.15	0.06	0.416806	0.94369	0.546068	0.758778	0.935565	0.995981	0.964415	0.980484	57502.8	59153.2	63198.2	65846.7	High	High	High	High	963
High	Master Protein	Q02257	Junction plakoglobin OS=Mus musculus OX=10090 GN=Jup PE=1 SV=3	0	436.14	67	38	151	32	1	745	539	38	7	1.029	1.144	1.168	1.051	0.04	0.19	0.22	0.07	0.777004	0.428111	0.584765	0.971824	0.994644	0.922841	0.970956	0.999848	2.37009e+07	2.43879e+07	2.71071e+07	2.84785e+07	High	High	High	High	964
High	Master Protein	Q924T2	28S ribosomal protein S2, mitochondrial OS=Mus musculus OX=10090 GN=Mrps2 PE=1 SV=1	0	51.217	41	10	17	9	1	291	48.97	10	0	1.029	1.045	1.072	1.055	0.04	0.06	0.1	0.08	0.402516	0.71632	0.431102	0.766861	0.931026	0.98508	0.950842	0.983863	725857	747062	758639	800669	High	High	High	High	965
High	Master Protein	Q9CRA9	FGFR1 oncogene partner 2 homolog OS=Mus musculus OX=10090 GN=Fgfr1op2 PE=1 SV=1	0.002	6.273	8	2	2	2	1	253	6.03	2	0	1.029	1.111	1.147	1.062	0.04	0.15	0.2	0.09	0.4003	0.997452	0.634876	0.686265	0.931026	0.999773	0.982221	0.970324	34033.5	35019.2	37810.8	40164.1	High	High	High	High	966
High	Master Protein	B1AR13	CDGSH iron-sulfur domain-containing protein 3, mitochondrial OS=Mus musculus OX=10090 GN=Cisd3 PE=1 SV=1	0	14.75	45	7	9	7	1	137	13.04	7	0	1.029	0.931	0.967	1.068	0.04	-0.1	-0.05	0.1	0.427249	0.102568	0.0722035	0.70006	0.938399	0.579923	0.508926	0.970324	989507	1.01831e+06	921481	984289	High	High	High	High	967
High	Master Protein	Q9ERS5	Pleckstrin homology domain-containing family A member 2 OS=Mus musculus OX=10090 GN=Plekha2 PE=1 SV=1	0.002	6.882	6	3	3	3	1	425	3.85	3	0	1.029	1.338	1.402	1.078	0.04	0.42	0.49	0.11	0.330678	0.0501771	0.0739756	0.570522	0.898597	0.387197	0.514309	0.96579	290245	298573	388316	418705	High	High	High	High	968
High	Master Protein	Q8K2M0	39S ribosomal protein L38, mitochondrial OS=Mus musculus OX=10090 GN=Mrpl38 PE=1 SV=2	0	27.031	26	8	10	8	1	380	17.87	8	0	1.029	1.055	1.116	1.088	0.04	0.08	0.16	0.12	0.375439	0.731238	0.654017	0.581529	0.923958	0.98508	0.985087	0.96579	439976	452565	464270	505090	High	High	High	High	969
High	Master Protein	Q9R1Q9	V-type proton ATPase subunit S1 OS=Mus musculus OX=10090 GN=Atp6ap1 PE=1 SV=1	0	27.706	14	6	8	6	1	463	22.11	6	0	1.029	1.102	1.167	1.089	0.04	0.14	0.22	0.12	0.343392	0.899231	0.939346	0.55878	0.914521	0.995494	0.995107	0.965089	286552	294796	315836	344025	High	High	High	High	970
High	Master Protein	Q921G7	Electron transfer flavoprotein-ubiquinone oxidoreductase, mitochondrial OS=Mus musculus OX=10090 GN=Etfdh PE=1 SV=1	0	329.21	56	34	170	34	1	616	540.17	34	0	1.029	0.995	1.063	1.099	0.04	-0.01	0.09	0.14	0.780071	0.637883	0.782472	0.798273	0.994644	0.97492	0.990777	0.986585	5.53493e+07	5.69295e+07	5.50581e+07	6.05302e+07	High	High	High	High	971
High	Master Protein	P70124	Serpin B5 OS=Mus musculus OX=10090 GN=Serpinb5 PE=1 SV=1	0	80.821	46	15	25	15	1	375	77.95	15	0	1.029	0.988	1.151	1.2	0.04	-0.02	0.2	0.26	0.381042	0.249911	0.985838	0.121482	0.924147	0.828725	0.999985	0.632443	2.46434e+06	2.5362e+06	2.43443e+06	2.92043e+06	High	High	High	High	972
High	Master Protein	Q8R3P6	Integrator complex subunit 14 OS=Mus musculus OX=10090 GN=Ints14 PE=1 SV=1	0	11.673	8	3	3	3	1	515	6.18	3	0	1.029	1.22	1.472	1.241	0.04	0.29	0.56	0.31	0.43206	0.389131	0.0674861	0.0911107	0.939353	0.908438	0.491154	0.562506	87128.3	89615.4	106320	131954	High	High	High	High	973
High	Master Protein	Q8CHP8	Glycerol-3-phosphate phosphatase OS=Mus musculus OX=10090 GN=Pgp PE=1 SV=1	0	21.77	19	5	5	5	1	321	11.58	5	0	1.029	1.096	1.396	1.31	0.04	0.13	0.48	0.39	0.453427	0.956762	0.144484	0.0376434	0.947927	0.998445	0.712618	0.343318	82964.3	85353.3	90967.8	119166	High	High	High	High	974
High	Master Protein	Q9JJ80	Ribosome production factor 2 homolog OS=Mus musculus OX=10090 GN=Rpf2 PE=2 SV=2	0	35.573	18	5	7	5	1	306	19.98	5	0	1.028	1.281	1.094	0.878	0.04	0.36	0.13	-0.19	0.447911	0.0692721	0.586319	0.169764	0.943859	0.470823	0.970956	0.722398	933341	959222	1.19539e+06	1.04977e+06	High	High	High	High	975
High	Master Protein	Q91Z40	Guanylate-binding protein 7 OS=Mus musculus OX=10090 GN=Gbp7 PE=1 SV=2	0	29.107	14	8	9	7	1	638	16.53	8	1	1.028	1.451	1.298	0.92	0.04	0.54	0.38	-0.12	0.368051	0.0101878	0.23571	0.405222	0.922667	0.131425	0.849229	0.920105	423357	435295	614100	564844	High	High	High	High	976
High	Master Protein	Q9CYA6	Zinc finger CCHC domain-containing protein 8 OS=Mus musculus OX=10090 GN=Zcchc8 PE=1 SV=3	0	20.728	9	4	5	4	1	709	8.51	4	0	1.028	1.041	1.061	1.048	0.04	0.06	0.09	0.07	0.437866	0.624356	0.332167	0.724209	0.940757	0.97492	0.910819	0.975648	69483.6	71437.1	72340.4	75823.8	High	High	High	High	977
Medium	Master Protein	O09159	Lysosomal alpha-mannosidase OS=Mus musculus OX=10090 GN=Man2b1 PE=1 SV=4	0.014	3.499	2	2	2	2	1	1013	2.31	2	0	1.028	1.011	1.039	1.056	0.04	0.02	0.06	0.08	0.419596	0.444343	0.213123	0.693907	0.935565	0.92792	0.831194	0.970324	50338.6	51737.6	50898.2	53767.4	High	High	High	High	978
High	Master Protein	P17225	Polypyrimidine tract-binding protein 1 OS=Mus musculus OX=10090 GN=Ptbp1 PE=1 SV=3	0	282.644	48	17	90	14	1	555	309.29	17	4	1.028	1.204	1.235	1.055	0.04	0.27	0.3	0.08	0.785091	0.209906	0.299503	0.99157	0.994644	0.776851	0.888539	0.999848	1.20476e+07	1.2383e+07	1.44997e+07	1.52923e+07	High	High	High	High	979
High	Master Protein	O88736	3-keto-steroid reductase/17-beta-hydroxysteroid dehydrogenase 7 OS=Mus musculus OX=10090 GN=Hsd17b7 PE=1 SV=1	0	23.644	17	4	5	4	1	334	12.25	4	0	1.028	0.972	1.015	1.073	0.04	-0.04	0.02	0.1	0.369384	0.30882	0.134843	0.656504	0.922781	0.876061	0.685479	0.970324	419912	431623	408331	438121	High	High	High	High	980
High	Master Protein	Q5BLK4	Terminal uridylyltransferase 7 OS=Mus musculus OX=10090 GN=Tut7 PE=1 SV=3	0	21.118	3	4	4	4	1	1491	12.52	4	0	1.028	1.066	1.124	1.084	0.04	0.09	0.17	0.12	0.397942	0.77369	0.524064	0.574362	0.931026	0.987205	0.960627	0.96579	35156.5	36148.5	37484.6	40614.7	High	High	High	High	981
High	Master Protein	Q4FK66	Pre-mRNA-splicing factor 38A OS=Mus musculus OX=10090 GN=Prpf38a PE=1 SV=1	0	12.833	7	3	6	3	1	312	12.38	3	0	1.028	1.123	1.19	1.09	0.04	0.17	0.25	0.12	0.395617	0.752615	0.875476	0.567358	0.929285	0.98508	0.990777	0.96579	226547	232948	254476	277303	High	High	High	High	982
High	Master Protein	Q9EQI8	39S ribosomal protein L46, mitochondrial OS=Mus musculus OX=10090 GN=Mrpl46 PE=1 SV=1	0	32.001	23	6	8	6	1	283	21.06	6	0	1.028	1.112	1.186	1.097	0.04	0.15	0.25	0.13	0.41468	0.858747	0.815187	0.546496	0.935524	0.993984	0.990777	0.965089	555066	570750	617146	677135	High	High	High	High	983
High	Master Protein	Q9ERG2	Striatin-3 OS=Mus musculus OX=10090 GN=Strn3 PE=1 SV=1	0	15.659	4	3	4	2	1	796	7.29	3	0	1.028	0.93	1.022	1.129	0.04	-0.1	0.03	0.17	0.410725	0.183035	0.147028	0.402246	0.93275	0.740027	0.71837	0.920105	45232.8	46490.6	42081.8	47491.2	High	High	High	High	984
High	Master Protein	Q9CR51	V-type proton ATPase subunit G 1 OS=Mus musculus OX=10090 GN=Atp6v1g1 PE=1 SV=3	0	13.151	12	2	3	2	1	118	5.05	2	0	1.028	1.015	1.174	1.19	0.04	0.02	0.23	0.25	0.445503	0.4828	0.99681	0.153324	0.943405	0.940071	0.999985	0.696788	85402.5	87830.1	86695.8	103146	High	High	High	High	985
High	Master Protein	Q9Z1K6	E3 ubiquitin-protein ligase ARIH2 OS=Mus musculus OX=10090 GN=Arih2 PE=1 SV=1	0	12.106	5	2	2	2	1	492	6.01	2	0	1.027	1.444	0.989	0.704	0.04	0.53	-0.02	-0.51	0.414266	0.00826299	0.137865	0.00137186	0.934952	0.110707	0.691703	0.0303712	171749	176466	248026	174590	High	High	High	High	986
High	Master Protein	P47911	60S ribosomal protein L6 OS=Mus musculus OX=10090 GN=Rpl6 PE=1 SV=3	0	144.293	57	24	77	24	1	296	224.93	24	0	1.027	1.227	1.133	0.948	0.04	0.3	0.18	-0.08	0.789802	0.152579	0.780187	0.487934	0.994644	0.694062	0.990777	0.949643	1.87079e+07	1.92162e+07	2.29595e+07	2.1766e+07	High	High	High	High	987
High	Master Protein	Q8BU31	Ras-related protein Rap-2c OS=Mus musculus OX=10090 GN=Rap2c PE=1 SV=1	0	19.901	28	4	5	4	1	183	10.57	4	0	1.027	1.187	1.107	0.958	0.04	0.25	0.15	-0.06	0.392234	0.411776	0.570678	0.616539	0.927269	0.91773	0.969841	0.96579	265589	272819	315304	301923	High	High	High	High	988
High	Master Protein	Q8BHC4	Dephospho-CoA kinase domain-containing protein OS=Mus musculus OX=10090 GN=Dcakd PE=1 SV=1	0	39.342	41	8	12	8	1	231	21.42	8	0	1.027	1.119	1.052	0.965	0.04	0.16	0.07	-0.05	0.424355	0.693079	0.33101	0.595296	0.936886	0.983544	0.910819	0.96579	816256	838095	913449	881732	High	High	High	High	989
High	Master Protein	P32883	GTPase KRas OS=Mus musculus OX=10090 GN=Kras PE=1 SV=1	0	87.564	57	9	23	5	1	189	81.56	9	3	1.027	1.076	1.029	0.981	0.04	0.11	0.04	-0.03	0.431134	0.861207	0.197991	0.843664	0.938491	0.994496	0.801751	0.994148	1.76096e+06	1.80783e+06	1.89555e+06	1.86009e+06	High	High	High	High	990
High	Master Protein	Q8CC86	Nicotinate phosphoribosyltransferase OS=Mus musculus OX=10090 GN=Naprt PE=1 SV=1	0	57.546	24	11	13	11	1	538	40.76	11	0	1.027	1.157	1.153	1.023	0.04	0.21	0.21	0.03	0.446104	0.477434	0.978042	0.920531	0.943859	0.938653	0.999773	0.997966	1.27054e+06	1.30495e+06	1.47042e+06	1.50437e+06	High	High	High	High	991
High	Master Protein	P98195	Probable phospholipid-transporting ATPase IIB OS=Mus musculus OX=10090 GN=Atp9b PE=1 SV=4	0.003	5.592	2	3	3	2	1	1146	4.41	3	0	1.027	1.222	1.237	1.04	0.04	0.29	0.31	0.06	0.420048	0.433584	0.780358	0.756444	0.93565	0.925756	0.990777	0.980157	50610.4	51983.4	61820.9	64278.9	High	High	High	High	992
High	Master Protein	O88952	Protein lin-7 homolog C OS=Mus musculus OX=10090 GN=Lin7c PE=1 SV=2	0	22.835	38	6	8	6	1	197	18.67	6	0	1.027	1.056	1.079	1.05	0.04	0.08	0.11	0.07	0.38811	0.78805	0.418249	0.823356	0.92493	0.988107	0.941952	0.990603	242909	249420	256430	269134	High	High	High	High	993
High	Master Protein	Q9EP72	ER membrane protein complex subunit 7 OS=Mus musculus OX=10090 GN=Emc7 PE=1 SV=1	0	28	38	7	13	7	1	241	34.4	7	0	1.027	1.048	1.079	1.058	0.04	0.07	0.11	0.08	0.417384	0.61922	0.456881	0.609573	0.935565	0.97492	0.956947	0.96579	1.79141e+06	1.84042e+06	1.87703e+06	1.98583e+06	High	High	High	High	994
High	Master Protein	Q9D6M3	Mitochondrial glutamate carrier 1 OS=Mus musculus OX=10090 GN=Slc25a22 PE=1 SV=1	0	52.616	35	9	21	9	1	323	58.02	9	0	1.027	1.042	1.088	1.072	0.04	0.06	0.12	0.1	0.391413	0.625561	0.673788	0.533223	0.926143	0.97492	0.986902	0.96154	3.40652e+06	3.4976e+06	3.55112e+06	3.80586e+06	High	High	High	High	995
High	Master Protein	Q9Z2I0	Mitochondrial proton/calcium exchanger protein OS=Mus musculus OX=10090 GN=Letm1 PE=1 SV=1	0	408.596	53	44	180	44	1	738	578.64	44	0	1.027	0.986	1.044	1.087	0.04	-0.02	0.06	0.12	0.79146	0.584349	0.664209	0.853846	0.994644	0.967694	0.985957	0.995594	2.18787e+07	2.2468e+07	2.15807e+07	2.34627e+07	High	High	High	High	996
High	Master Protein	Q6P4T2	U5 small nuclear ribonucleoprotein 200 kDa helicase OS=Mus musculus OX=10090 GN=Snrnp200 PE=1 SV=1	0	421.597	40	77	134	77	1	2136	314.78	77	0	1.027	1.077	1.138	1.085	0.04	0.11	0.19	0.12	0.792607	0.862277	0.783925	0.843941	0.994644	0.99479	0.990777	0.994148	7.93172e+06	8.14407e+06	8.54279e+06	9.26721e+06	High	High	High	High	997
High	Master Protein	Q8R123	FAD synthase OS=Mus musculus OX=10090 GN=Flad1 PE=1 SV=1	0	47.239	29	12	16	12	1	492	37.18	12	0	1.027	1.12	1.186	1.088	0.04	0.16	0.25	0.12	0.417105	0.647794	0.801708	0.578383	0.935565	0.97492	0.990777	0.96579	833003	855788	933257	1.01529e+06	High	High	High	High	998
High	Master Protein	Q8R0Y8	Mitochondrial coenzyme A transporter SLC25A42 OS=Mus musculus OX=10090 GN=Slc25a42 PE=1 SV=1	0	53.171	41	10	15	10	1	318	44.4	10	0	1.027	1.107	1.237	1.147	0.04	0.15	0.31	0.2	0.420918	0.8245	0.509872	0.258031	0.936074	0.991263	0.959125	0.831517	726630	746093	804551	922843	High	High	High	High	999
High	Master Protein	Q9DC61	Mitochondrial-processing peptidase subunit alpha OS=Mus musculus OX=10090 GN=Pmpca PE=1 SV=1	0	132.334	52	24	37	24	1	524	112.08	24	0	1.027	1.007	1.161	1.184	0.04	0.01	0.22	0.24	0.413581	0.365202	0.837532	0.146362	0.934856	0.90151	0.990777	0.688823	3.51185e+06	3.60549e+06	3.53652e+06	4.18561e+06	High	High	High	High	1000
High	Master Protein	Q9D0J8	Parathymosin OS=Mus musculus OX=10090 GN=Ptms PE=1 SV=3	0	14.893	23	2	5	2	1	101	12.93	2	0	1.027	1.098	1.27	1.188	0.04	0.13	0.35	0.25	0.382249	0.927412	0.441284	0.193362	0.924147	0.995494	0.954745	0.75136	283830	291544	311654	370313	High	High	High	High	1001
High	Master Protein	Q8K211	High affinity copper uptake protein 1 OS=Mus musculus OX=10090 GN=Slc31a1 PE=2 SV=1	0	11.482	15	2	2	2	1	196	6	2	0	1.027	0.881	1.029	1.199	0.04	-0.18	0.04	0.26	0.401457	0.0958185	0.197507	0.190266	0.931026	0.561968	0.801041	0.747316	26439.9	27156	23293.3	27933.7	High	High	High	High	1002
High	Master Protein	Q9D7P6	Iron-sulfur cluster assembly enzyme ISCU OS=Mus musculus OX=10090 GN=Iscu PE=1 SV=1	0	19.406	34	7	8	7	1	168	17.03	7	0	1.027	0.907	1.057	1.195	0.04	-0.14	0.08	0.26	0.45635	0.0497302	0.360644	0.114109	0.950422	0.385033	0.915503	0.613467	1.07379e+06	1.1024e+06	974403	1.1649e+06	High	High	High	High	1003
High	Master Protein	Q80ZU0	ADP-ribosylation factor-like protein 5A OS=Mus musculus OX=10090 GN=Arl5a PE=1 SV=1	0.008	4.518	12	2	2	2	1	179	0	2	0	1.027	1.54	1.79	1.194	0.04	0.62	0.84	0.26	0.369227	0.025558	0.0026428	0.191273	0.922781	0.249491	0.0477263	0.748565	21837.2	22433.2	33631.7	40145.8	High	High	High	High	1004
High	Master Protein	P45878	Peptidyl-prolyl cis-trans isomerase FKBP2 OS=Mus musculus OX=10090 GN=Fkbp2 PE=1 SV=1	0	42.808	39	7	16	7	1	140	48.59	7	0	1.027	1.016	1.213	1.226	0.04	0.02	0.28	0.29	0.400999	0.381526	0.551599	0.0643668	0.931026	0.906777	0.964415	0.473352	1.90435e+06	1.95656e+06	1.93554e+06	2.37365e+06	High	High	High	High	1005
High	Master Protein	Q8BP92	Reticulocalbin-2 OS=Mus musculus OX=10090 GN=Rcn2 PE=1 SV=1	0	24.501	14	6	11	4	1	320	19.45	6	0	1.027	1.01	1.244	1.265	0.04	0.01	0.31	0.34	0.447225	0.46105	0.683796	0.0702227	0.943859	0.930416	0.986902	0.495134	73527.4	75533.5	74283	93938.3	High	High	High	High	1006
High	Master Protein	Q3TRM4	Patatin-like phospholipase domain-containing protein 6 OS=Mus musculus OX=10090 GN=Pnpla6 PE=1 SV=2	0	68.449	14	15	18	15	1	1355	39.85	15	0	1.027	1.189	1.536	1.327	0.04	0.25	0.62	0.41	0.368701	0.430785	0.00239201	0.0270398	0.922781	0.92385	0.0440175	0.283753	393745	404555	468353	621327	High	High	High	High	1007
High	Master Protein	P70296	Phosphatidylethanolamine-binding protein 1 OS=Mus musculus OX=10090 GN=Pebp1 PE=1 SV=3	0	67.508	57	6	17	6	1	187	56.85	6	0	1.027	0.995	1.295	1.336	0.04	-0.01	0.37	0.42	0.455643	0.272318	0.172808	0.0059302	0.950422	0.845984	0.763166	0.0979999	1.61966e+06	1.66283e+06	1.61197e+06	2.15414e+06	High	High	High	High	1008
High	Master Protein	Q9CRD0	OCIA domain-containing protein 1 OS=Mus musculus OX=10090 GN=Ociad1 PE=1 SV=1	0	87.056	69	12	32	12	1	247	105.87	12	0	1.027	0.996	1.687	1.74	0.04	-0.01	0.75	0.8	0.38202	0.272582	7.06403e-05	2.00146e-06	0.924147	0.845984	0.00219665	0.000103031	3.19313e+06	3.27913e+06	3.17967e+06	5.53177e+06	High	High	High	High	1009
High	Master Protein	Q9WV54	Acid ceramidase OS=Mus musculus OX=10090 GN=Asah1 PE=1 SV=1	0	110.801	37	17	41	17	1	394	105.63	17	0	1.026	1.047	0.967	0.948	0.04	0.07	-0.05	-0.08	0.475464	0.738828	0.121444	0.660333	0.950422	0.98508	0.659995	0.970324	4.64228e+06	4.76457e+06	4.8611e+06	4.60824e+06	High	High	High	High	1010
High	Master Protein	Q99LD9	Translation initiation factor eIF-2B subunit beta OS=Mus musculus OX=10090 GN=Eif2b2 PE=1 SV=1	0	27.359	26	8	8	8	1	351	18.63	8	0	1.026	1.182	1.104	0.958	0.04	0.24	0.14	-0.06	0.389685	0.435476	0.542897	0.588582	0.92493	0.925756	0.964415	0.96579	274216	281402	324051	310531	High	High	High	High	1011
High	Master Protein	Q91WM3	U3 small nucleolar RNA-interacting protein 2 OS=Mus musculus OX=10090 GN=Rrp9 PE=1 SV=1	0	48.534	28	9	14	9	1	475	31.34	9	0	1.026	1.23	1.288	1.075	0.04	0.3	0.36	0.1	0.378888	0.254189	0.314557	0.650305	0.924147	0.8319	0.901141	0.970324	345268	354416	424607	456400	High	High	High	High	1012
High	Master Protein	P63094	Guanine nucleotide-binding protein G(s) subunit alpha isoforms short OS=Mus musculus OX=10090 GN=Gnas PE=1 SV=1	0	81.336	43	15	35	14	1	394	97.31	15	0	1.026	1.036	1.09	1.08	0.04	0.05	0.12	0.11	0.409329	0.510271	0.677453	0.500633	0.932494	0.945766	0.986902	0.953034	2.93377e+06	3.01148e+06	3.04029e+06	3.28359e+06	High	High	High	High	1013
High	Master Protein	P59999	Actin-related protein 2/3 complex subunit 4 OS=Mus musculus OX=10090 GN=Arpc4 PE=1 SV=3	0	77.791	61	10	39	10	1	168	104.39	10	0	1.026	1.045	1.125	1.105	0.04	0.06	0.17	0.14	0.685751	0.816751	0.947364	0.561053	0.984024	0.991263	0.996515	0.96579	6.21929e+06	6.38108e+06	6.49941e+06	7.18079e+06	High	High	High	High	1014
High	Master Protein	Q925G2	Plasma membrane ascorbate-dependent reductase CYBRD1 OS=Mus musculus OX=10090 GN=Cybrd1 PE=1 SV=2	0.002	7.651	11	3	3	3	1	290	5.08	3	0	1.026	1.077	1.179	1.123	0.04	0.11	0.24	0.17	0.405803	0.813207	0.807484	0.390309	0.931501	0.991263	0.990777	0.919922	41932	43021.8	45157	50717.6	High	High	High	High	1015
High	Master Protein	Q61543	Golgi apparatus protein 1 OS=Mus musculus OX=10090 GN=Glg1 PE=1 SV=1	0	273.631	37	44	85	44	1	1175	229.33	44	0	1.025	1.086	1.017	0.96	0.04	0.12	0.02	-0.06	0.775849	0.851052	0.411867	0.601809	0.994644	0.993839	0.941175	0.96579	7.49339e+06	7.68304e+06	8.13953e+06	7.81444e+06	High	High	High	High	1016
High	Master Protein	Q8VDN2	Sodium/potassium-transporting ATPase subunit alpha-1 OS=Mus musculus OX=10090 GN=Atp1a1 PE=1 SV=1	0	565.864	54	59	317	37	1	1023	982.38	59	18	1.025	1.141	1.1	0.987	0.03	0.19	0.14	-0.02	0.808606	0.438765	0.982609	0.6647	0.994644	0.926815	0.999985	0.970324	4.43093e+07	4.53958e+07	5.05759e+07	4.99337e+07	High	High	High	High	1017
High	Master Protein	P14824	Annexin A6 OS=Mus musculus OX=10090 GN=Anxa6 PE=1 SV=3	0	200.241	55	39	70	37	1	673	166.91	39	2	1.025	1.157	1.173	1.039	0.04	0.21	0.23	0.06	0.674557	0.507375	0.637305	0.904889	0.984024	0.94521	0.982252	0.995594	6.14166e+06	6.29598e+06	7.1037e+06	7.38427e+06	High	High	High	High	1018
High	Master Protein	E9Q7E2	AT-rich interactive domain-containing protein 2 OS=Mus musculus OX=10090 GN=Arid2 PE=1 SV=1	0.002	6.777	1	2	2	2	1	1828	5.14	2	0	1.025	1.191	1.227	1.056	0.04	0.25	0.3	0.08	0.443125	0.53717	0.77924	0.682095	0.943343	0.957519	0.990777	0.970324	62668.8	64212.5	74631.2	78797.9	High	High	High	High	1019
High	Master Protein	P47809	Dual specificity mitogen-activated protein kinase kinase 4 OS=Mus musculus OX=10090 GN=Map2k4 PE=1 SV=2	0	37.704	36	12	15	12	1	397	37	12	0	1.025	1.153	1.238	1.101	0.04	0.21	0.31	0.14	0.469557	0.518033	0.444065	0.423693	0.950422	0.95004	0.955011	0.921379	1.07918e+06	1.10616e+06	1.24396e+06	1.36961e+06	High	High	High	High	1020
High	Master Protein	Q66GT5	Phosphatidylglycerophosphatase and protein-tyrosine phosphatase 1 OS=Mus musculus OX=10090 GN=Ptpmt1 PE=1 SV=1	0	61.835	45	10	18	10	1	193	53.55	10	0	1.025	1.001	1.091	1.117	0.04	0	0.13	0.16	0.408178	0.284536	0.567683	0.325872	0.932494	0.855556	0.969841	0.880835	2.27472e+06	2.33122e+06	2.27675e+06	2.54402e+06	High	High	High	High	1021
High	Master Protein	Q8K2Y7	39S ribosomal protein L47, mitochondrial OS=Mus musculus OX=10090 GN=Mrpl47 PE=1 SV=2	0	36.952	27	7	15	7	1	252	26.99	7	0	1.025	0.992	1.11	1.147	0.04	-0.01	0.15	0.2	0.415646	0.348342	0.663915	0.313504	0.935565	0.896637	0.985957	0.874528	504976	517471	500750	574324	High	High	High	High	1022
High	Master Protein	Q9CPU0	Lactoylglutathione lyase OS=Mus musculus OX=10090 GN=Glo1 PE=1 SV=3	0	22.023	26	5	7	5	1	184	15.87	5	0	1.025	1.003	1.217	1.244	0.04	0	0.28	0.31	0.400213	0.417069	0.602234	0.0947586	0.931026	0.918636	0.971031	0.568845	442814	454041	444222	552412	High	High	High	High	1023
High	Master Protein	P17918	Proliferating cell nuclear antigen OS=Mus musculus OX=10090 GN=Pcna PE=1 SV=2	0	30.269	31	8	12	7	1	261	27.4	8	0	1.024	1.318	1.164	0.904	0.03	0.4	0.22	-0.15	0.419463	0.0536843	0.962754	0.341211	0.935565	0.404722	0.997047	0.888764	501776	513960	661405	598067	High	High	High	High	1024
High	Master Protein	Q91UZ5	Inositol monophosphatase 2 OS=Mus musculus OX=10090 GN=Impa2 PE=1 SV=1	0	21.202	22	5	8	5	1	290	18.07	5	0	1.024	1.478	1.321	0.915	0.03	0.56	0.4	-0.13	0.419547	0.00443329	0.241974	0.353598	0.935565	0.0673443	0.855886	0.888764	220395	225757	325836	298152	High	High	High	High	1025
High	Master Protein	Q80VL1	Tudor and KH domain-containing protein OS=Mus musculus OX=10090 GN=Tdrkh PE=1 SV=1	0	13.699	9	4	5	4	1	560	11.9	4	0	1.024	1.198	1.078	0.921	0.03	0.26	0.11	-0.12	0.461348	0.42609	0.475745	0.514961	0.950422	0.921315	0.957561	0.956731	126511	129509	151604	139622	High	High	High	High	1026
High	Master Protein	Q8R5C8	Zinc finger MYND domain-containing protein 11 OS=Mus musculus OX=10090 GN=Zmynd11 PE=1 SV=2	0.003	5.656	2	2	2	2	1	602	2.3	2	0	1.024	1.12	1.032	0.944	0.03	0.16	0.05	-0.08	0.45337	0.83905	0.298369	0.655752	0.947927	0.991632	0.887932	0.970324	127527	130625	142801	134869	High	High	High	High	1027
High	Master Protein	Q80TS8	Protein sel-1 homolog 3 OS=Mus musculus OX=10090 GN=Sel1l3 PE=2 SV=3	0	53.989	12	13	18	13	1	1137	56.34	13	0	1.024	1.179	1.111	0.965	0.03	0.24	0.15	-0.05	0.401704	0.390409	0.68956	0.756187	0.931026	0.908438	0.986902	0.980157	2.02336e+06	2.07151e+06	2385226	2.30135e+06	High	High	High	High	1028
High	Master Protein	Q9ET30	Transmembrane 9 superfamily member 3 OS=Mus musculus OX=10090 GN=Tm9sf3 PE=1 SV=1	0	121.098	22	19	53	19	1	587	137.98	19	0	1.024	1.017	0.984	0.991	0.03	0.02	-0.02	-0.01	0.815592	0.786927	0.34013	0.67999	0.994644	0.988107	0.911286	0.970324	9.97263e+06	1.02074e+07	1.01422e+07	1.00462e+07	High	High	High	High	1029
High	Master Protein	Q9JIK9	28S ribosomal protein S34, mitochondrial OS=Mus musculus OX=10090 GN=Mrps34 PE=1 SV=1	0	60.238	54	11	22	11	1	218	57.13	11	0	1.024	1.04	1.05	1.034	0.03	0.06	0.07	0.05	0.458752	0.575805	0.328376	0.845543	0.950422	0.965076	0.910807	0.994434	1.22262e+06	1.25245e+06	1.27195e+06	1.31465e+06	High	High	High	High	1030
High	Master Protein	Q59J78	NADH dehydrogenase [ubiquinone] 1 alpha subcomplex assembly factor 2 OS=Mus musculus OX=10090 GN=Ndufaf2 PE=1 SV=1	0	50.614	61	11	23	11	1	168	45.21	11	0	1.024	1.067	1.108	1.064	0.03	0.09	0.15	0.09	0.416894	0.787613	0.683489	0.612339	0.935565	0.988107	0.986902	0.96579	2.24045e+06	2.29492e+06	2.39059e+06	2.54293e+06	High	High	High	High	1031
High	Master Protein	P62071	Ras-related protein R-Ras2 OS=Mus musculus OX=10090 GN=Rras2 PE=1 SV=1	0	57.968	44	8	18	6	1	204	41.06	8	0	1.024	1.042	1.095	1.076	0.03	0.06	0.13	0.11	0.484157	0.640555	0.590841	0.554821	0.950422	0.97492	0.970956	0.965089	1.04513e+06	1.07068e+06	1.08907e+06	1.17236e+06	High	High	High	High	1032
High	Master Protein	Q8R2Y0	Monoacylglycerol lipase ABHD6 OS=Mus musculus OX=10090 GN=Abhd6 PE=1 SV=1	0	75.148	44	13	20	13	1	336	56.68	13	0	1.024	1.071	1.133	1.084	0.03	0.1	0.18	0.12	0.460126	0.8237	0.845955	0.452293	0.950422	0.991263	0.990777	0.932974	1.56547e+06	1.60336e+06	1.67601e+06	1.817e+06	High	High	High	High	1033
High	Master Protein	Q70FJ1	A-kinase anchor protein 9 OS=Mus musculus OX=10090 GN=Akap9 PE=1 SV=2	0	59.553	6	19	22	19	1	3797	33.85	19	0	1.024	1.072	1.147	1.095	0.03	0.1	0.2	0.13	0.422045	0.838001	0.93314	0.522059	0.936074	0.991263	0.99388	0.958135	489064	500797	524419	574386	High	High	High	High	1034
High	Master Protein	Q99LI7	Cleavage stimulation factor subunit 3 OS=Mus musculus OX=10090 GN=Cstf3 PE=1 SV=1	0	31.173	15	9	11	9	1	717	19.53	9	0	1.024	1.077	1.188	1.129	0.03	0.11	0.25	0.18	0.373619	0.903921	0.863018	0.385693	0.922781	0.995494	0.990777	0.915726	378965	388056	408156	460826	High	High	High	High	1035
High	Master Protein	Q8C5L6	Inositol polyphosphate 5-phosphatase K OS=Mus musculus OX=10090 GN=Inpp5k PE=1 SV=2	0.001	7.704	5	2	2	2	1	468	7.55	2	0	1.024	0.999	1.233	1.263	0.03	0	0.3	0.34	0.430649	0.397685	0.612606	0.0523879	0.938491	0.912397	0.97405	0.42325	188566	193027	188431	237987	High	High	High	High	1036
High	Master Protein	Q91VE6	MKI67 FHA domain-interacting nucleolar phosphoprotein OS=Mus musculus OX=10090 GN=Nifk PE=1 SV=1	0	21.271	19	5	7	5	1	317	16.54	5	0	1.023	1.242	1.03	0.849	0.03	0.31	0.04	-0.24	0.446709	0.176302	0.218491	0.127069	0.943859	0.730572	0.835713	0.640541	557606	570487	692520	587779	High	High	High	High	1037
High	Master Protein	Q9ES34	Ubiquitin-protein ligase E3B OS=Mus musculus OX=10090 GN=Ube3b PE=1 SV=3	0	9.525	2	3	3	3	1	1070	5.46	3	0	1.023	1.174	1.085	0.945	0.03	0.23	0.12	-0.08	0.44272	0.60734	0.498089	0.724919	0.942827	0.97181	0.957561	0.975648	93512.9	95653	109819	103807	High	High	High	High	1038
High	Master Protein	Q91VJ4	Serine/threonine-protein kinase 38 OS=Mus musculus OX=10090 GN=Stk38 PE=1 SV=1	0	46.933	21	8	11	6	1	465	35.67	8	2	1.023	1.115	1.052	0.965	0.03	0.16	0.07	-0.05	0.469176	0.7971	0.3407	0.707034	0.950422	0.990464	0.911286	0.970754	1.27625e+06	1.3057e+06	1.42351e+06	1.37338e+06	High	High	High	High	1039
High	Master Protein	Q8BLF1	Neutral cholesterol ester hydrolase 1 OS=Mus musculus OX=10090 GN=Nceh1 PE=1 SV=1	0	142.151	39	17	43	17	1	408	134.91	17	0	1.023	1.081	1.055	0.999	0.03	0.11	0.08	0	0.500816	0.98629	0.48387	0.995543	0.950422	0.999773	0.957561	0.999848	4.24656e+06	4.34558e+06	4.59238e+06	4.58614e+06	High	High	High	High	1040
High	Master Protein	Q9JKD3	Secretory carrier-associated membrane protein 5 OS=Mus musculus OX=10090 GN=Scamp5 PE=1 SV=1	0	16.097	12	3	5	3	1	235	16.2	3	0	1.023	1.084	1.07	1.01	0.03	0.12	0.1	0.01	0.490396	0.966723	0.408189	0.933486	0.950422	0.999773	0.940044	0.997966	1.46249e+06	1.49553e+06	1.58468e+06	1.60071e+06	High	High	High	High	1041
High	Master Protein	Q6PIU9	Uncharacterized protein FLJ45252 homolog OS=Mus musculus OX=10090 PE=1 SV=2	0	33.823	34	8	10	8	1	354	25.91	8	0	1.023	1.248	1.226	1.005	0.03	0.32	0.29	0.01	0.412607	0.169627	0.548311	0.903138	0.934835	0.727259	0.964415	0.995594	520951	532764	650154	653193	High	High	High	High	1042
High	Master Protein	O55028	[3-methyl-2-oxobutanoate dehydrogenase [lipoamide]] kinase, mitochondrial OS=Mus musculus OX=10090 GN=Bckdk PE=1 SV=1	0	55.238	36	11	17	11	1	412	54.77	11	0	1.023	1.064	1.078	1.036	0.03	0.09	0.11	0.05	0.48624	0.796754	0.475877	0.84075	0.950422	0.990464	0.957561	0.993296	1.17624e+06	1.20314e+06	1.25197e+06	1.29744e+06	High	High	High	High	1043
High	Master Protein	Q61102	Iron-sulfur clusters transporter ABCB7, mitochondrial OS=Mus musculus OX=10090 GN=Abcb7 PE=1 SV=3	0	143.049	35	24	43	24	1	752	111.77	24	0	1.023	0.991	1.055	1.089	0.03	-0.01	0.08	0.12	0.717324	0.477172	0.547707	0.610783	0.987376	0.938653	0.964415	0.96579	6.30578e+06	6.45003e+06	6.24726e+06	6.80598e+06	High	High	High	High	1044
High	Master Protein	P28798	Progranulin OS=Mus musculus OX=10090 GN=Grn PE=1 SV=2	0	20.261	8	3	4	3	1	589	17.07	3	0	1.023	1.121	1.188	1.084	0.03	0.16	0.25	0.12	0.377387	0.749177	0.911101	0.565323	0.924147	0.98508	0.991669	0.96579	315797	323012	353853	383651	High	High	High	High	1045
High	Master Protein	Q8K4P0	pre-mRNA 3' end processing protein WDR33 OS=Mus musculus OX=10090 GN=Wdr33 PE=1 SV=1	0	22.895	5	7	7	7	1	1330	18.54	7	0	1.023	1.096	1.186	1.107	0.03	0.13	0.25	0.15	0.440443	0.825757	0.800808	0.469583	0.942339	0.991263	0.990777	0.942688	852653	872369	934534	1.03494e+06	High	High	High	High	1046
High	Master Protein	Q9CQ88	Tetraspanin-31 OS=Mus musculus OX=10090 GN=Tspan31 PE=1 SV=1	0	18.323	10	2	3	2	1	210	10.69	2	0	1.023	1.093	1.191	1.115	0.03	0.13	0.25	0.16	0.408482	0.956871	0.884836	0.395141	0.932494	0.998445	0.990777	0.920105	254955	260880	278744	310759	High	High	High	High	1047
High	Master Protein	Q8K0C9	GDP-mannose 4,6 dehydratase OS=Mus musculus OX=10090 GN=Gmds PE=1 SV=1	0	144.34	58	24	67	24	1	372	176.8	24	0	1.023	0.932	1.029	1.129	0.03	-0.1	0.04	0.17	0.817628	0.291035	0.571023	0.671022	0.994644	0.861701	0.969841	0.970324	1.13929e+07	1.16579e+07	1.06234e+07	1.19917e+07	High	High	High	High	1048
High	Master Protein	P17047	Lysosome-associated membrane glycoprotein 2 OS=Mus musculus OX=10090 GN=Lamp2 PE=1 SV=2	0	46.386	17	8	16	8	1	415	42.87	8	0	1.023	0.946	1.07	1.158	0.03	-0.08	0.1	0.21	0.444483	0.0998587	0.542421	0.199224	0.943405	0.569028	0.964415	0.759538	3.59466e+06	3.67893e+06	3.40015e+06	3.93623e+06	High	High	High	High	1049
High	Master Protein	Q11011	Puromycin-sensitive aminopeptidase OS=Mus musculus OX=10090 GN=Npepps PE=1 SV=2	0	73.733	19	16	18	16	1	920	55.75	16	0	1.023	0.912	1.126	1.264	0.03	-0.13	0.17	0.34	0.479853	0.0409276	0.825749	0.0382929	0.950422	0.342122	0.990777	0.344814	1.21762e+06	1.24622e+06	1.11088e+06	1.40387e+06	High	High	High	High	1050
High	Master Protein	P99029	Peroxiredoxin-5, mitochondrial OS=Mus musculus OX=10090 GN=Prdx5 PE=1 SV=2	0	182.296	61	13	81	13	1	210	273.22	13	0	1.023	0.896	1.144	1.307	0.03	-0.16	0.19	0.39	0.817384	0.155139	0.716638	0.172998	0.994644	0.699687	0.986902	0.723458	1.6832e+07	1.7224e+07	1.50734e+07	1.96968e+07	High	High	High	High	1051
High	Master Protein	Q91VU1	Protein YIPF1 OS=Mus musculus OX=10090 GN=Yipf1 PE=2 SV=1	0.003	5.614	6	2	2	2	1	306	3.06	2	0	1.022	1.315	1.061	0.825	0.03	0.4	0.09	-0.28	0.426362	0.0776908	0.352475	0.0690303	0.937159	0.502786	0.912574	0.490891	234854	240112	308910	254837	High	High	High	High	1052
High	Master Protein	Q9WTQ8	Mitochondrial import inner membrane translocase subunit Tim23 OS=Mus musculus OX=10090 GN=Timm23 PE=1 SV=1	0	58.258	32	5	19	5	1	209	58.86	5	0	1.022	1.126	1.052	0.955	0.03	0.17	0.07	-0.07	0.431164	0.745979	0.338349	0.714401	0.938491	0.98508	0.911286	0.97095	2.37257e+06	2.4246e+06	2.67034e+06	2.5511e+06	High	High	High	High	1053
High	Master Protein	P21279	Guanine nucleotide-binding protein G(q) subunit alpha OS=Mus musculus OX=10090 GN=Gnaq PE=1 SV=4	0	106.438	52	17	38	9	1	359	100.5	17	1	1.022	1.013	0.966	0.974	0.03	0.02	-0.05	-0.04	0.476128	0.386411	0.0581557	0.747538	0.950422	0.907132	0.454784	0.978593	1.22744e+06	1.25449e+06	1.24385e+06	1.2113e+06	High	High	High	High	1054
High	Master Protein	Q3KNM2	E3 ubiquitin-protein ligase MARCHF5 OS=Mus musculus OX=10090 GN=Marchf5 PE=1 SV=1	0	32.293	32	7	9	7	1	278	16.84	7	0	1.022	1.154	1.117	0.989	0.03	0.21	0.16	-0.02	0.432696	0.561982	0.667609	0.789894	0.939353	0.960081	0.986778	0.986585	227807	232762	262800	260003	High	High	High	High	1055
High	Master Protein	P14404	Histone-lysine N-methyltransferase MECOM OS=Mus musculus OX=10090 GN=Mecom PE=1 SV=2	0	27.377	10	9	10	9	1	1232	22.14	9	0	1.022	1.122	1.09	0.993	0.03	0.17	0.12	-0.01	0.400254	0.771428	0.463034	0.830124	0.931026	0.987205	0.957031	0.992256	373544	381755	419143	416106	High	High	High	High	1056
High	Master Protein	Q8BFV2	PCI domain-containing protein 2 OS=Mus musculus OX=10090 GN=Pcid2 PE=1 SV=1	0	15.98	10	3	4	3	1	399	9.43	3	0	1.022	1.129	1.099	0.994	0.03	0.18	0.14	-0.01	0.363995	0.704531	0.504825	0.862871	0.918957	0.98508	0.957561	0.995594	328220	335394	370642	368567	High	High	High	High	1057
High	Master Protein	Q9R049	E3 ubiquitin-protein ligase AMFR OS=Mus musculus OX=10090 GN=Amfr PE=1 SV=2	0	19.887	10	3	3	3	1	643	10.52	3	0	1.022	1.171	1.167	1.018	0.03	0.23	0.22	0.03	0.433195	0.474666	0.98815	0.978634	0.939353	0.938365	0.999985	0.999848	223812	228693	262169	266807	High	High	High	High	1058
High	Master Protein	Q9QYA2	Mitochondrial import receptor subunit TOM40 homolog OS=Mus musculus OX=10090 GN=Tomm40 PE=1 SV=3	0	175.614	45	12	57	12	1	361	206.53	12	0	1.022	1.035	1.06	1.046	0.03	0.05	0.08	0.07	0.61785	0.71726	0.561507	0.77935	0.982438	0.98508	0.96751	0.986585	5.73446e+06	5.8624e+06	5.93572e+06	6.21158e+06	High	High	High	High	1059
High	Master Protein	Q4PJX1	Protein odr-4 homolog OS=Mus musculus OX=10090 GN=Odr4 PE=1 SV=2	0	71.809	36	17	27	17	1	447	52.57	17	0	1.022	1.075	1.102	1.047	0.03	0.1	0.14	0.07	0.422168	0.843484	0.638135	0.709167	0.936074	0.992047	0.982252	0.970754	2.29461e+06	2.34494e+06	2.46632e+06	2.58344e+06	High	High	High	High	1060
High	Master Protein	Q61464	Zinc finger protein 638 OS=Mus musculus OX=10090 GN=Znf638 PE=1 SV=2	0.001	7.742	2	3	3	3	1	1960	2.05	3	0	1.022	1.096	1.156	1.077	0.03	0.13	0.21	0.11	0.471913	0.988132	0.895919	0.59199	0.950422	0.999773	0.991522	0.96579	166747	170375	182732	196881	High	High	High	High	1061
High	Master Protein	Q91YP0	L-2-hydroxyglutarate dehydrogenase, mitochondrial OS=Mus musculus OX=10090 GN=L2hgdh PE=1 SV=1	0	110.182	44	19	44	19	1	464	122.29	19	0	1.022	1.044	1.125	1.101	0.03	0.06	0.17	0.14	0.508195	0.642897	0.951459	0.425453	0.952009	0.97492	0.996516	0.92187	4.20406e+06	4.29731e+06	4.38922e+06	4.83302e+06	High	High	High	High	1062
High	Master Protein	Q99N92	39S ribosomal protein L27, mitochondrial OS=Mus musculus OX=10090 GN=Mrpl27 PE=1 SV=1	0	17.003	26	4	8	4	1	148	17.52	4	0	1.022	0.984	1.097	1.139	0.03	-0.02	0.13	0.19	0.385491	0.357129	0.489968	0.332835	0.924161	0.900056	0.957561	0.882423	315992	322812	310915	354029	High	High	High	High	1063
High	Master Protein	Q6PGH1	Protein BUD31 homolog OS=Mus musculus OX=10090 GN=Bud31 PE=1 SV=2	0	20.847	46	6	8	6	1	144	14	6	0	1.022	0.995	1.133	1.164	0.03	-0.01	0.18	0.22	0.416526	0.392672	0.755814	0.25808	0.935565	0.909302	0.986902	0.831517	245129	250608	243908	283958	High	High	High	High	1064
High	Master Protein	Q69ZN7	Myoferlin OS=Mus musculus OX=10090 GN=Myof PE=1 SV=2	0	296.623	33	61	90	61	1	2048	217.65	61	0	1.022	1.02	1.191	1.192	0.03	0.03	0.25	0.25	0.829875	0.741566	0.472233	0.409188	0.994644	0.98508	0.957561	0.920105	7.84503e+06	8.01409e+06	8.00521e+06	9.54314e+06	High	High	High	High	1065
High	Master Protein	P59266	Acyl-coenzyme A diphosphatase FITM2 OS=Mus musculus OX=10090 GN=Fitm2 PE=1 SV=1	0	10.867	5	2	3	2	1	262	9.85	2	0	1.022	0.973	1.19	1.251	0.03	-0.04	0.25	0.32	0.434392	0.261364	0.768921	0.0946984	0.939353	0.838125	0.988564	0.568845	463165	473449	450502	563381	High	High	High	High	1066
High	Master Protein	O35682	Myeloid-associated differentiation marker OS=Mus musculus OX=10090 GN=Myadm PE=1 SV=2	0	14.022	11	3	8	3	1	320	18.08	3	0	1.021	0.999	0.877	0.896	0.03	0	-0.19	-0.16	0.436752	0.284621	0.00177495	0.286188	0.940688	0.855556	0.0348693	0.858746	1.99505e+06	2.03721e+06	1.99321e+06	1.78589e+06	High	High	High	High	1067
High	Master Protein	Q8BHZ0	CYFIP-related Rac1 interactor A OS=Mus musculus OX=10090 GN=Cyria PE=1 SV=1	0	14.407	16	5	6	3	1	323	14	5	0	1.021	1.265	1.165	0.94	0.03	0.34	0.22	-0.09	0.462807	0.209627	0.958917	0.617487	0.950422	0.776851	0.996516	0.96579	118406	120911	149831	140836	High	High	High	High	1068
High	Master Protein	Q8BFZ9	Erlin-2 OS=Mus musculus OX=10090 GN=Erlin2 PE=1 SV=1	0	191.819	61	22	88	17	1	340	268.41	22	5	1.021	1.057	0.989	0.956	0.03	0.08	-0.02	-0.06	0.830435	0.936954	0.363299	0.522114	0.994644	0.995494	0.91692	0.958135	1.62642e+07	1.66134e+07	1.71918e+07	1.64348e+07	High	High	High	High	1069
High	Master Protein	Q9CQU3	Protein RER1 OS=Mus musculus OX=10090 GN=Rer1 PE=1 SV=1	0	37.223	32	6	21	6	1	196	69.94	6	0	1.021	1.085	1.044	0.982	0.03	0.12	0.06	-0.03	0.557086	0.946458	0.441765	0.88363	0.967671	0.995981	0.954745	0.995594	5.02948e+06	5.13362e+06	5.45535e+06	5.35885e+06	High	High	High	High	1070
High	Master Protein	Q69ZP3	Probable hydrolase PNKD OS=Mus musculus OX=10090 GN=Pnkd PE=1 SV=2	0	19.788	9	3	4	3	1	385	12.08	3	0	1.021	1.081	1.043	0.984	0.03	0.11	0.06	-0.02	0.445587	0.965984	0.295151	0.798921	0.943405	0.999773	0.887903	0.986585	205221	209480	221886	218387	High	High	High	High	1071
High	Master Protein	Q80TI0	Protein Aster-B OS=Mus musculus OX=10090 GN=Gramd1b PE=1 SV=2	0	17.49	7	5	5	5	1	738	10.94	5	0	1.021	1.104	1.101	1.019	0.03	0.14	0.14	0.03	0.478811	0.937697	0.590454	0.899579	0.950422	0.995494	0.970956	0.995594	127320	130042	140508	143165	High	High	High	High	1072
High	Master Protein	Q3U7R1	Extended synaptotagmin-1 OS=Mus musculus OX=10090 GN=Esyt1 PE=1 SV=2	0	110.93	26	26	36	26	1	1092	88.36	26	0	1.021	1.199	1.21	1.03	0.03	0.26	0.27	0.04	0.500516	0.263588	0.606148	0.798091	0.950422	0.838166	0.971853	0.986585	1.12112e+06	1.14466e+06	1.34426e+06	1.38448e+06	High	High	High	High	1073
High	Master Protein	Q04736	Tyrosine-protein kinase Yes OS=Mus musculus OX=10090 GN=Yes1 PE=1 SV=3	0	72.111	33	17	28	12	1	541	77.61	17	2	1.021	1.085	1.098	1.033	0.03	0.12	0.13	0.05	0.491076	0.943668	0.574748	0.762731	0.950422	0.995981	0.969841	0.982899	1.61309e+06	1.64713e+06	1.74983e+06	1.80793e+06	High	High	High	High	1074
High	Master Protein	Q80SW1	S-adenosylhomocysteine hydrolase-like protein 1 OS=Mus musculus OX=10090 GN=Ahcyl1 PE=1 SV=1	0	79.912	31	19	30	5	1	530	71.34	19	0	1.021	1.069	1.106	1.057	0.03	0.1	0.15	0.08	0.4966	0.853227	0.655606	0.700561	0.950422	0.993984	0.985087	0.970324	999829	1.02074e+06	1068737	1.12934e+06	High	High	High	High	1075
High	Master Protein	Q64331	Unconventional myosin-VI OS=Mus musculus OX=10090 GN=Myo6 PE=1 SV=2	0	436.267	53	71	157	71	1	1262	436.95	71	0	1.021	1.082	1.133	1.068	0.03	0.11	0.18	0.09	0.837149	0.768539	0.780239	0.944775	0.994644	0.987205	0.990777	0.999592	1.99718e+07	2.03821e+07	2.16189e+07	2.30864e+07	High	High	High	High	1076
High	Master Protein	Q61712	DnaJ homolog subfamily C member 1 OS=Mus musculus OX=10090 GN=Dnajc1 PE=1 SV=1	0	65.02	28	15	18	15	1	552	48.25	15	0	1.021	1.023	1.09	1.089	0.03	0.03	0.12	0.12	0.482371	0.434922	0.528279	0.425374	0.950422	0.925756	0.961903	0.92187	1.62843e+06	1.66312e+06	1.66513e+06	1.81356e+06	High	High	High	High	1077
High	Master Protein	Q9JHR7	Insulin-degrading enzyme OS=Mus musculus OX=10090 GN=Ide PE=1 SV=1	0	63.097	15	12	19	12	1	1019	42.42	12	0	1.021	0.965	1.031	1.091	0.03	-0.05	0.04	0.13	0.479542	0.229372	0.228797	0.572919	0.950422	0.797945	0.845195	0.96579	766025	781855	739412	806376	High	High	High	High	1078
High	Master Protein	P70245	3-beta-hydroxysteroid-Delta(8),Delta(7)-isomerase OS=Mus musculus OX=10090 GN=Ebp PE=1 SV=3	0.001	8.99	10	2	3	2	1	230	8.35	2	0	1.021	1.002	1.077	1.096	0.03	0	0.11	0.13	0.50094	0.340634	0.448589	0.440217	0.950422	0.896637	0.955524	0.929826	1.46882e+06	1.49968e+06	1.47246e+06	1.61448e+06	High	High	High	High	1079
High	Master Protein	O55106	Striatin OS=Mus musculus OX=10090 GN=Strn PE=1 SV=2	0	41.785	16	11	11	11	1	780	29.88	11	0	1.021	1.051	1.136	1.104	0.03	0.07	0.18	0.14	0.486551	0.743313	0.875137	0.434628	0.950422	0.98508	0.990777	0.927187	947601	967556	995937	1.09935e+06	High	High	High	High	1080
High	Master Protein	O09005	Sphingolipid delta(4)-desaturase DES1 OS=Mus musculus OX=10090 GN=Degs1 PE=1 SV=1	0	19.935	16	3	4	3	1	323	13.89	3	0	1.021	0.945	1.029	1.112	0.03	-0.08	0.04	0.15	0.459976	0.200753	0.259941	0.445097	0.950422	0.765009	0.863956	0.930052	153603	156891	145187	161493	High	High	High	High	1081
High	Master Protein	Q9CVB6	Actin-related protein 2/3 complex subunit 2 OS=Mus musculus OX=10090 GN=Arpc2 PE=1 SV=3	0	115.909	51	18	70	18	1	300	188.49	18	0	1.021	1.039	1.127	1.108	0.03	0.06	0.17	0.15	0.833439	0.939958	0.812796	0.761608	0.994644	0.995494	0.990777	0.982105	1.1436e+07	1.16768e+07	1.18838e+07	1.31626e+07	High	High	High	High	1082
High	Master Protein	Q9D8B6	Protein FAM210B, mitochondrial OS=Mus musculus OX=10090 GN=Fam210b PE=1 SV=3	0	27.28	19	4	9	4	1	190	26.28	4	0	1.021	0.937	1.081	1.177	0.03	-0.09	0.11	0.24	0.477248	0.138	0.485687	0.215956	0.950422	0.665741	0.957561	0.781715	772125	788425	723688	852087	High	High	High	High	1083
High	Master Protein	P50247	Adenosylhomocysteinase OS=Mus musculus OX=10090 GN=Ahcy PE=1 SV=3	0	56.14	29	13	20	11	1	432	41.93	13	0	1.021	0.868	1.01	1.188	0.03	-0.2	0.01	0.25	0.436609	0.00554399	0.159776	0.12079	0.940688	0.0804362	0.734831	0.632443	2.27771e+06	2.32583e+06	1.97735e+06	2.34867e+06	High	High	High	High	1084
High	Master Protein	Q6A068	Cell division cycle 5-like protein OS=Mus musculus OX=10090 GN=Cdc5l PE=1 SV=2	0	85.754	31	19	26	19	1	802	65.71	19	0	1.021	1.057	1.272	1.229	0.03	0.08	0.35	0.3	0.467798	0.819121	0.356755	0.0815294	0.950422	0.991263	0.915503	0.532275	799357	816284	844573	1.03812e+06	High	High	High	High	1085
High	Master Protein	Q8C407	Protein YIPF4 OS=Mus musculus OX=10090 GN=Yipf4 PE=1 SV=1	0.001	8.112	13	3	3	3	1	246	4.92	3	0	1.02	1.665	1.05	0.643	0.03	0.74	0.07	-0.64	0.463222	0.000756835	0.270576	0.000694889	0.950422	0.0155045	0.867057	0.0182904	56197.4	57311.9	93542.9	60171.6	High	High	High	High	1086
High	Master Protein	Q8BQM4	HEAT repeat-containing protein 3 OS=Mus musculus OX=10090 GN=Heatr3 PE=1 SV=1	0	12.212	7	4	4	4	1	679	7.98	4	0	1.02	1.647	1.534	0.951	0.03	0.72	0.62	-0.07	0.46253	0.0140643	0.149235	0.779006	0.950422	0.163326	0.720766	0.986585	12610	12864.9	20763.7	19738.4	High	High	High	High	1087
High	Master Protein	Q922K9	Tyrosine-protein kinase FRK OS=Mus musculus OX=10090 GN=Frk PE=1 SV=3	0	68.639	29	14	18	13	1	512	49.86	14	0	1.02	1.14	1.073	0.96	0.03	0.19	0.1	-0.06	0.504269	0.613754	0.454579	0.615339	0.951532	0.974912	0.95636	0.96579	1.01336e+06	1.03372e+06	1.15493e+06	1.10912e+06	High	High	High	High	1088
High	Master Protein	Q9Z0V7	Mitochondrial import inner membrane translocase subunit Tim17-B OS=Mus musculus OX=10090 GN=Timm17b PE=1 SV=1	0	61.595	52	6	15	6	1	172	52.95	6	0	1.02	1.068	1.016	0.97	0.03	0.09	0.02	-0.04	0.458805	0.78928	0.151785	0.74822	0.950422	0.988596	0.72373	0.978947	2.07463e+06	2.11531e+06	2.2154e+06	2.14813e+06	High	High	High	High	1089
High	Master Protein	P09055	Integrin beta-1 OS=Mus musculus OX=10090 GN=Itgb1 PE=1 SV=1	0	166.136	35	25	52	24	1	798	140.92	25	1	1.02	1.13	1.099	0.992	0.03	0.18	0.14	-0.01	0.521441	0.625766	0.770894	0.949318	0.954894	0.97492	0.989635	0.999848	4.17411e+06	4.25928e+06	4.71789e+06	4.68097e+06	High	High	High	High	1090
High	Master Protein	Q8VDQ9	Protein KRI1 homolog OS=Mus musculus OX=10090 GN=Kri1 PE=1 SV=3	0	12.384	5	4	4	3	1	704	10.18	4	0	1.02	1.169	1.171	1.022	0.03	0.22	0.23	0.03	0.428583	0.499102	0.969852	0.965135	0.938491	0.944906	0.998629	0.999848	274989	280460	321368	328331	High	High	High	High	1091
High	Master Protein	Q9D1I2	Caspase recruitment domain-containing protein 19 OS=Mus musculus OX=10090 GN=Card19 PE=1 SV=1	0	33.078	42	8	10	8	1	183	27.9	8	0	1.02	1.042	1.098	1.074	0.03	0.06	0.13	0.1	0.472844	0.72278	0.587715	0.664492	0.950422	0.98508	0.970956	0.970324	715567	729585	745607	801104	High	High	High	High	1092
High	Master Protein	Q99J39	Malonyl-CoA decarboxylase, mitochondrial OS=Mus musculus OX=10090 GN=Mlycd PE=1 SV=1	0	137.759	42	16	38	16	1	492	129.08	16	0	1.02	1.04	1.093	1.072	0.03	0.06	0.13	0.1	0.485589	0.592422	0.718405	0.538506	0.950422	0.968502	0.986902	0.964436	3.89311e+06	3.97194e+06	4.05036e+06	4.34098e+06	High	High	High	High	1093
High	Master Protein	Q3UMF0	Cordon-bleu protein-like 1 OS=Mus musculus OX=10090 GN=Cobll1 PE=1 SV=2	0	130.068	25	27	38	27	1	1273	110.49	27	0	1.02	1.062	1.2	1.152	0.03	0.09	0.26	0.2	0.460637	0.803182	0.563149	0.21958	0.950422	0.990901	0.96782	0.786198	3.57724e+06	3.64844e+06	3.7994e+06	4.37635e+06	High	High	High	High	1094
High	Master Protein	Q8BH57	WD repeat-containing protein 48 OS=Mus musculus OX=10090 GN=Wdr48 PE=1 SV=1	0	10.539	7	4	4	4	1	676	0	4	0	1.02	1.116	1.267	1.158	0.03	0.16	0.34	0.21	0.48453	0.915523	0.53206	0.221695	0.950422	0.995494	0.963215	0.786879	80537.1	82183.1	89894.1	104102	High	High	High	High	1095
High	Master Protein	Q9DBR0	A-kinase anchor protein 8 OS=Mus musculus OX=10090 GN=Akap8 PE=1 SV=1	0	34.328	14	9	10	9	1	687	18.25	9	0	1.02	0.992	1.216	1.251	0.03	-0.01	0.28	0.32	0.482954	0.327028	0.638458	0.109526	0.950422	0.894005	0.982252	0.599355	606458	618675	601652	752606	High	High	High	High	1096
High	Master Protein	O88848	ADP-ribosylation factor-like protein 6 OS=Mus musculus OX=10090 GN=Arl6 PE=1 SV=1	0.001	8.233	16	3	5	3	1	186	4.62	3	0	1.019	1.427	1.283	0.916	0.03	0.51	0.36	-0.13	0.477468	0.0277596	0.462441	0.498808	0.950422	0.263506	0.957031	0.953034	87793	89463	125319	114813	High	High	High	High	1097
High	Master Protein	P27641	X-ray repair cross-complementing protein 5 OS=Mus musculus OX=10090 GN=Xrcc5 PE=1 SV=4	0	101.126	28	18	32	17	1	732	73.85	18	1	1.019	1.101	1.033	0.956	0.03	0.14	0.05	-0.07	0.466715	0.928792	0.304519	0.700945	0.950422	0.995494	0.893429	0.970324	2.79435e+06	2.84743e+06	3.07759e+06	2.94108e+06	High	High	High	High	1098
High	Master Protein	O35379	Multidrug resistance-associated protein 1 OS=Mus musculus OX=10090 GN=Abcc1 PE=1 SV=1	0	63.617	13	17	20	16	1	1528	52.49	17	0	1.019	1.078	1.027	0.971	0.03	0.11	0.04	-0.04	0.504543	0.879375	0.169644	0.76047	0.951532	0.995494	0.75692	0.981725	1.62786e+06	1.65845e+06	1.75468e+06	1.70293e+06	High	High	High	High	1099
High	Master Protein	Q14C51	Pentatricopeptide repeat domain-containing protein 3, mitochondrial OS=Mus musculus OX=10090 GN=Ptcd3 PE=1 SV=2	0	156.494	45	30	63	30	1	685	160.02	30	0	1.019	1.129	1.079	0.974	0.03	0.17	0.11	-0.04	0.528029	0.653364	0.626789	0.840191	0.958794	0.97492	0.981362	0.993296	4.06601e+06	4.14138e+06	4.59008e+06	4.47062e+06	High	High	High	High	1100
High	Master Protein	Q8BYZ7	Engulfment and cell motility protein 3 OS=Mus musculus OX=10090 GN=Elmo3 PE=1 SV=2	0	49.172	21	12	12	12	1	720	24.71	12	0	1.019	1.106	1.078	0.993	0.03	0.15	0.11	-0.01	0.487304	0.841334	0.469684	0.804206	0.950422	0.991812	0.957326	0.986585	614808	626385	680130	675506	High	High	High	High	1101
High	Master Protein	Q9CWU2	Palmitoyltransferase ZDHHC13 OS=Mus musculus OX=10090 GN=Zdhhc13 PE=1 SV=2	0	86.531	30	15	21	15	1	622	70.05	15	0	1.019	1.118	1.116	1.018	0.03	0.16	0.16	0.03	0.470549	0.785683	0.734476	0.887868	0.950422	0.988107	0.986902	0.995594	2.13761e+06	2.17858e+06	2.38892e+06	2.43205e+06	High	High	High	High	1102
High	Master Protein	Q9QXX4	Electrogenic aspartate/glutamate antiporter SLC25A13, mitochondrial OS=Mus musculus OX=10090 GN=Slc25a13 PE=1 SV=1	0	389.05	56	37	151	31	1	676	487.73	37	0	1.019	0.994	1	1.025	0.03	-0.01	0	0.04	0.851818	0.630256	0.414607	0.84636	0.994644	0.97492	0.941175	0.994434	1.5851e+07	1.61445e+07	1.5749e+07	1.61416e+07	High	High	High	High	1103
High	Master Protein	Q3U186	Probable arginine--tRNA ligase, mitochondrial OS=Mus musculus OX=10090 GN=Rars2 PE=1 SV=1	0	81.635	29	15	22	15	1	578	48.36	15	0	1.019	1.1	1.202	1.113	0.03	0.14	0.27	0.15	0.529859	0.887066	0.62479	0.309283	0.958824	0.995494	0.981049	0.871656	1.37894e+06	1.40477e+06	1.51729e+06	1.68856e+06	High	High	High	High	1104
High	Master Protein	P16546	Spectrin alpha chain, non-erythrocytic 1 OS=Mus musculus OX=10090 GN=Sptan1 PE=1 SV=4	0	1436.55	70	187	524	187	1	2472	1508.17	187	0	1.019	1.152	1.257	1.113	0.03	0.2	0.33	0.15	0.845501	0.393191	0.23183	0.737479	0.994644	0.909302	0.845195	0.977575	4.30218e+07	4.38558e+07	4.95399e+07	5.51444e+07	High	High	High	High	1105
High	Master Protein	Q6PEM6	GRAM domain-containing protein 2B OS=Mus musculus OX=10090 GN=Gramd2b PE=1 SV=2	0	16.309	8	4	7	4	1	445	11.63	4	0	1.019	0.987	1.204	1.243	0.03	-0.02	0.27	0.31	0.421448	0.385659	0.7617	0.063634	0.936074	0.906777	0.988083	0.471192	348191	354960	343761	427228	High	High	High	High	1106
High	Master Protein	P26369	Splicing factor U2AF 65 kDa subunit OS=Mus musculus OX=10090 GN=U2af2 PE=1 SV=3	0	71.061	32	12	23	12	1	475	65.8	12	0	1.019	1.109	1.345	1.236	0.03	0.15	0.43	0.31	0.466978	0.881923	0.0778599	0.0669991	0.950422	0.995494	0.531038	0.485481	2.93744e+06	2.99319e+06	3.25747e+06	4.02504e+06	High	High	High	High	1107
High	Master Protein	P23591	GDP-L-fucose synthase OS=Mus musculus OX=10090 GN=Gfus PE=1 SV=3	0	40.461	31	7	8	7	1	321	27.48	7	0	1.019	0.849	1.054	1.266	0.03	-0.24	0.08	0.34	0.49092	0.0144138	0.328158	0.0687603	0.950422	0.166388	0.910807	0.49017	764924	779394	649059	821827	High	High	High	High	1108
High	Master Protein	P09411	Phosphoglycerate kinase 1 OS=Mus musculus OX=10090 GN=Pgk1 PE=1 SV=4	0	173.436	64	23	69	23	1	417	215.98	23	0	1.019	0.835	1.128	1.376	0.03	-0.26	0.17	0.46	0.84757	0.0421827	0.809226	0.0843777	0.994644	0.349102	0.990777	0.541152	9.31984e+06	9.49784e+06	7.78418e+06	1.0712e+07	High	High	High	High	1109
High	Master Protein	Q9CXJ1	Probable glutamate--tRNA ligase, mitochondrial OS=Mus musculus OX=10090 GN=Ears2 PE=1 SV=1	0	26.853	18	9	10	9	1	523	24.88	9	0	1.018	1.121	1.115	1.013	0.03	0.16	0.16	0.02	0.414916	0.769778	0.601465	0.967531	0.935565	0.987205	0.970956	0.999848	312318	318006	350029	354630	High	High	High	High	1110
High	Master Protein	Q9CPV4	Glyoxalase domain-containing protein 4 OS=Mus musculus OX=10090 GN=Glod4 PE=1 SV=1	0	158.568	67	20	59	20	1	298	165.69	20	0	1.018	1.195	1.198	1.02	0.03	0.26	0.26	0.03	0.549718	0.277943	0.528344	0.91649	0.967506	0.852103	0.961903	0.997966	4.79736e+06	4.8816e+06	5.73301e+06	5.8461e+06	High	High	High	High	1111
High	Master Protein	Q9JK42	[Pyruvate dehydrogenase (acetyl-transferring)] kinase isozyme 2, mitochondrial OS=Mus musculus OX=10090 GN=Pdk2 PE=1 SV=2	0	65.774	31	9	16	8	1	407	46.57	9	0	1.018	1.045	1.064	1.037	0.03	0.06	0.09	0.05	0.513175	0.607809	0.399151	0.745187	0.95405	0.97181	0.932897	0.977575	1.33299e+06	1.35675e+06	1.39241e+06	1.44415e+06	High	High	High	High	1112
High	Master Protein	P27601	Guanine nucleotide-binding protein subunit alpha-13 OS=Mus musculus OX=10090 GN=Gna13 PE=1 SV=1	0	123.495	54	23	61	21	1	377	169.72	23	2	1.018	1.068	1.095	1.044	0.03	0.09	0.13	0.06	0.776522	0.977765	0.856542	0.937117	0.994644	0.999773	0.990777	0.998573	6.81427e+06	6.93522e+06	7.27468e+06	7.5913e+06	High	High	High	High	1113
High	Master Protein	Q9R0M6	Ras-related protein Rab-9A OS=Mus musculus OX=10090 GN=Rab9a PE=1 SV=1	0	72.617	50	10	20	10	1	201	56.98	10	0	1.018	1.016	1.058	1.061	0.03	0.02	0.08	0.08	0.513295	0.469059	0.379199	0.680904	0.95405	0.933246	0.917621	0.970324	1.01535e+06	1.03343e+06	1.0312e+06	1.09372e+06	High	High	High	High	1114
High	Master Protein	Q8BFP9	[Pyruvate dehydrogenase (acetyl-transferring)] kinase isozyme 1, mitochondrial OS=Mus musculus OX=10090 GN=Pdk1 PE=1 SV=2	0	64.587	32	12	16	12	1	434	46.24	12	0	1.018	1.033	1.087	1.071	0.03	0.05	0.12	0.1	0.529202	0.525052	0.545062	0.614466	0.958824	0.951102	0.964415	0.96579	1.20617e+06	1.22755e+06	1.24633e+06	1.33489e+06	High	High	High	High	1115
High	Master Protein	P17809	Solute carrier family 2, facilitated glucose transporter member 1 OS=Mus musculus OX=10090 GN=Slc2a1 PE=1 SV=4	0	23.683	11	5	9	5	1	492	17.33	5	0	1.018	0.986	1.129	1.166	0.03	-0.02	0.17	0.22	0.390433	0.364529	0.694115	0.258162	0.92493	0.90151	0.986902	0.831517	323227	329151	318672	371508	High	High	High	High	1116
High	Master Protein	Q80U56	Late secretory pathway protein AVL9 homolog OS=Mus musculus OX=10090 GN=Avl9 PE=1 SV=2	0.008	4.478	3	2	2	2	1	649	0	2	0	1.018	1.004	1.516	1.537	0.03	0.01	0.6	0.62	0.444716	0.472468	0.0615298	0.00138496	0.943405	0.935608	0.46588	0.0304383	38039.2	38712.3	38174.6	58669.1	High	High	High	High	1117
High	Master Protein	Q9DBT4	Ectonucleoside triphosphate diphosphohydrolase 4 OS=Mus musculus OX=10090 GN=Entpd4 PE=1 SV=1	0.002	7.484	5	2	2	2	1	613	3.51	2	0	1.017	1.321	0.992	0.764	0.02	0.4	-0.01	-0.39	0.420786	0.256808	0.150881	0.0732832	0.936074	0.832441	0.723216	0.506084	18648.1	18972.1	24638.6	18823.7	High	High	High	High	1118
High	Master Protein	Q6NWW9	Fibronectin type III domain-containing protein 3B OS=Mus musculus OX=10090 GN=Fndc3b PE=1 SV=1	0	27.912	6	6	7	6	1	1207	18.3	6	0	1.017	1.142	1.091	0.972	0.02	0.19	0.13	-0.04	0.444989	0.693113	0.47077	0.713231	0.943405	0.983544	0.957561	0.970754	405980	412840	463634	450541	High	High	High	High	1119
High	Master Protein	Q8BXL7	ADP-ribosylation factor-related protein 1 OS=Mus musculus OX=10090 GN=Arfrp1 PE=1 SV=2	0	19.707	28	5	6	5	1	201	13.38	5	0	1.017	1.114	1.086	0.991	0.02	0.16	0.12	-0.01	0.44789	0.818313	0.440198	0.80973	0.943859	0.991263	0.954324	0.987529	284947	289807	317539	314639	High	High	High	High	1120
High	Master Protein	Q9ERN0	Secretory carrier-associated membrane protein 2 OS=Mus musculus OX=10090 GN=Scamp2 PE=1 SV=1	0	28.25	17	7	15	7	1	329	40.87	7	0	1.017	1.181	1.154	0.994	0.02	0.24	0.21	-0.01	0.511703	0.352181	0.98827	0.942801	0.95405	0.897112	0.999985	0.999167	1.55027e+06	1.57732e+06	1.83057e+06	1.82007e+06	High	High	High	High	1121
High	Master Protein	Q3TGW2	Endonuclease/exonuclease/phosphatase family domain-containing protein 1 OS=Mus musculus OX=10090 GN=Eepd1 PE=1 SV=1	0	10.262	9	3	3	3	1	569	6.06	3	0	1.017	1.323	1.303	1.002	0.02	0.4	0.38	0	0.47693	0.124608	0.465116	0.999676	0.950422	0.63522	0.957031	0.999848	54265.5	55211.6	71813.2	71926.4	High	High	High	High	1122
High	Master Protein	Q9CQV7	Mitochondrial import inner membrane translocase subunit TIM14 OS=Mus musculus OX=10090 GN=Dnajc19 PE=1 SV=3	0	17.713	61	8	9	7	1	116	15.38	8	1	1.017	1.122	1.122	1.016	0.02	0.17	0.17	0.02	0.530398	0.728296	0.771927	0.950389	0.959339	0.98508	0.989883	0.999848	1.14752e+06	1.16673e+06	1.28784e+06	1.30861e+06	High	High	High	High	1123
High	Master Protein	Q6P4S8	Integrator complex subunit 1 OS=Mus musculus OX=10090 GN=Ints1 PE=1 SV=2	0	13.09	2	5	5	5	1	2195	9.11	5	0	1.017	1.12	1.14	1.035	0.02	0.16	0.19	0.05	0.463362	0.777649	0.822048	0.894053	0.950422	0.98744	0.990777	0.995594	217235	220950	243220	251802	High	High	High	High	1124
High	Master Protein	P61965	WD repeat-containing protein 5 OS=Mus musculus OX=10090 GN=Wdr5 PE=1 SV=1	0	17.073	17	5	5	5	1	334	12.51	5	0	1.017	1.162	1.228	1.075	0.02	0.22	0.3	0.1	0.471855	0.592882	0.514301	0.608397	0.950422	0.968502	0.959125	0.96579	478195	486512	555788	597264	High	High	High	High	1125
High	Master Protein	Q9DCI9	39S ribosomal protein L32, mitochondrial OS=Mus musculus OX=10090 GN=Mrpl32 PE=1 SV=1	0	9.641	11	3	3	3	1	187	8.84	3	0	1.017	1.127	1.196	1.08	0.02	0.17	0.26	0.11	0.429364	0.735872	0.866617	0.634999	0.938491	0.98508	0.990777	0.970324	287484	292373	324034	349818	High	High	High	High	1126
High	Master Protein	P41241	Tyrosine-protein kinase CSK OS=Mus musculus OX=10090 GN=Csk PE=1 SV=2	0	55.074	29	12	19	12	1	450	48.92	12	0	1.017	1.131	1.199	1.078	0.02	0.18	0.26	0.11	0.487495	0.680478	0.663956	0.530137	0.950422	0.981182	0.985957	0.959664	2.1048e+06	2.14055e+06	2.37983e+06	2.56592e+06	High	High	High	High	1127
High	Master Protein	Q9D0L4	AarF domain-containing protein kinase 1 OS=Mus musculus OX=10090 GN=Adck1 PE=1 SV=1	0	114.778	41	16	38	16	1	525	110.73	16	0	1.017	0.991	1.056	1.084	0.02	-0.01	0.08	0.12	0.519957	0.24814	0.331456	0.421621	0.954894	0.827529	0.910819	0.920953	1.57518e+06	1.60167e+06	1.56164e+06	1.69211e+06	High	High	High	High	1128
High	Master Protein	P19639	Glutathione S-transferase Mu 3 OS=Mus musculus OX=10090 GN=Gstm3 PE=1 SV=2	0	57.922	48	13	29	5	1	218	69.01	13	0	1.017	0.83	0.891	1.092	0.02	-0.27	-0.17	0.13	0.483057	0.00425543	0.00605541	0.543352	0.950422	0.0653248	0.0919379	0.965089	639130	650002	530230	578887	High	High	High	High	1129
High	Master Protein	Q91XC9	Peroxisomal membrane protein PEX16 OS=Mus musculus OX=10090 GN=Pex16 PE=1 SV=2	0	33.035	18	5	7	5	1	336	24.56	5	0	1.017	0.985	1.067	1.103	0.02	-0.02	0.09	0.14	0.499125	0.292789	0.414219	0.498481	0.950422	0.862069	0.941175	0.953034	613447	624026	604124	666102	High	High	High	High	1130
High	Master Protein	Q8BGT5	Alanine aminotransferase 2 OS=Mus musculus OX=10090 GN=Gpt2 PE=1 SV=1	0	278.271	60	27	98	26	1	522	312.67	27	1	1.017	1.055	1.143	1.101	0.02	0.08	0.19	0.14	0.864743	0.950146	0.722585	0.791073	0.994644	0.996925	0.986902	0.986585	1.03257e+07	1.04985e+07	1.08947e+07	1.19949e+07	High	High	High	High	1131
High	Master Protein	Q9Z109	V-set and immunoglobulin domain-containing protein 2 OS=Mus musculus OX=10090 GN=Vsig2 PE=2 SV=2	0	42.003	26	7	16	7	1	328	49.6	7	0	1.017	0.997	1.091	1.114	0.02	0	0.13	0.16	0.484531	0.26252	0.607292	0.351242	0.950422	0.838125	0.972699	0.888764	2.63957e+06	2.68534e+06	2.63095e+06	2.93044e+06	High	High	High	High	1132
High	Master Protein	Q6PE01	U5 small nuclear ribonucleoprotein 40 kDa protein OS=Mus musculus OX=10090 GN=Snrnp40 PE=1 SV=1	0	85.265	45	12	17	12	1	358	56.59	12	0	1.017	1.073	1.178	1.116	0.02	0.1	0.24	0.16	0.51562	0.836115	0.789518	0.304938	0.954439	0.991263	0.990777	0.870663	1.72313e+06	1.75268e+06	1.84939e+06	2.06447e+06	High	High	High	High	1133
High	Master Protein	Q8R143	Pituitary tumor-transforming gene 1 protein-interacting protein OS=Mus musculus OX=10090 GN=Pttg1ip PE=1 SV=1	0	22.922	19	6	22	6	1	174	44.45	6	0	1.017	1.114	1.221	1.115	0.02	0.16	0.29	0.16	0.4845	0.839963	0.458064	0.333058	0.950422	0.991632	0.957031	0.882423	2.85627e+06	2.90443e+06	3.18127e+06	3.54595e+06	High	High	High	High	1134
High	Master Protein	Q9CZ42	ATP-dependent (S)-NAD(P)H-hydrate dehydratase OS=Mus musculus OX=10090 GN=Naxd PE=1 SV=1	0	108.907	57	13	34	13	1	343	102.77	13	0	1.017	0.985	1.117	1.154	0.02	-0.02	0.16	0.21	0.543472	0.282236	0.91892	0.253864	0.967506	0.855246	0.991669	0.827576	4.49459e+06	4.57272e+06	4.42754e+06	5.10826e+06	High	High	High	High	1135
High	Master Protein	Q8K4Z5	Splicing factor 3A subunit 1 OS=Mus musculus OX=10090 GN=Sf3a1 PE=1 SV=1	0	174.635	33	28	45	28	1	791	117.8	28	0	1.017	1.107	1.258	1.155	0.02	0.15	0.33	0.21	0.466596	0.818058	0.293623	0.197481	0.950422	0.991263	0.886048	0.757755	3.29286e+06	3.34762e+06	3.64639e+06	4.21076e+06	High	High	High	High	1136
High	Master Protein	Q925N0	Sideroflexin-5 OS=Mus musculus OX=10090 GN=Sfxn5 PE=1 SV=2	0	27.742	17	6	11	6	1	342	19.8	6	0	1.017	1.057	1.245	1.198	0.02	0.08	0.32	0.26	0.422028	0.791215	0.550567	0.146122	0.936074	0.988932	0.964415	0.688252	316638	322044	334557	400800	High	High	High	High	1137
High	Master Protein	Q9CQL5	39S ribosomal protein L18, mitochondrial OS=Mus musculus OX=10090 GN=Mrpl18 PE=1 SV=1	0	14.84	17	3	5	3	1	180	8.23	3	0	1.017	0.911	1.086	1.213	0.03	-0.13	0.12	0.28	0.492027	0.0662281	0.499944	0.13624	0.950422	0.459255	0.957561	0.666945	564434	574309	514179	623508	High	High	High	High	1138
High	Master Protein	Q91WE6	Threonylcarbamoyladenosine tRNA methylthiotransferase OS=Mus musculus OX=10090 GN=Cdkal1 PE=1 SV=1	0	14.203	10	5	6	5	1	578	2.93	5	0	1.017	0.878	1.178	1.365	0.02	-0.19	0.24	0.45	0.494102	0.0509208	0.937328	0.0131189	0.950422	0.391874	0.994876	0.178301	64427.6	65546.6	56581.1	77237.1	High	High	High	High	1139
High	Master Protein	Q6PGF7	Exocyst complex component 8 OS=Mus musculus OX=10090 GN=Exoc8 PE=1 SV=1	0	62.492	27	17	20	17	1	716	49.81	17	0	1.016	1.085	1.057	0.99	0.02	0.12	0.08	-0.01	0.541243	0.977867	0.346241	0.865817	0.966898	0.999773	0.911286	0.995594	1.3582e+06	1.38017e+06	1.47345e+06	1.45824e+06	High	High	High	High	1140
High	Master Protein	Q5NBX1	Protein cordon-bleu OS=Mus musculus OX=10090 GN=Cobl PE=1 SV=1	0.001	8.627	2	2	2	2	1	1337	6.08	2	0	1.016	1.103	1.075	0.991	0.02	0.14	0.1	-0.01	0.486437	0.995702	0.469667	0.994221	0.950422	0.999773	0.957326	0.999848	102981	104653	113564	112497	High	High	High	High	1141
High	Master Protein	Q9CXF4	TBC1 domain family member 15 OS=Mus musculus OX=10090 GN=Tbc1d15 PE=1 SV=1	0	61.608	23	15	19	15	1	671	42.28	15	0	1.016	1.139	1.115	0.994	0.02	0.19	0.16	-0.01	0.501246	0.498002	0.700671	0.778098	0.950422	0.944906	0.986902	0.986585	837991	851271	954480	948767	High	High	High	High	1142
High	Master Protein	Q148W0	Phospholipid-transporting ATPase IC OS=Mus musculus OX=10090 GN=Atp8b1 PE=1 SV=2	0	112.709	23	28	41	27	1	1251	81.84	28	1	1.016	1.065	1.077	1.027	0.02	0.09	0.11	0.04	0.485157	0.743004	0.609478	0.792496	0.950422	0.98508	0.972699	0.986585	3.17425e+06	3.22351e+06	3.37986e+06	3.47153e+06	High	High	High	High	1143
High	Master Protein	Q9DBX6	Cytochrome P450 2S1 OS=Mus musculus OX=10090 GN=Cyp2s1 PE=1 SV=1	0	193.177	45	27	120	27	1	501	382.21	27	0	1.016	0.975	1	1.042	0.02	-0.04	0	0.06	0.869007	0.517262	0.414907	0.927822	0.994644	0.95004	0.941175	0.997966	2.65949e+07	2.70245e+07	2.59428e+07	2.70212e+07	High	High	High	High	1144
High	Master Protein	Q8CJF7	Protein ELYS OS=Mus musculus OX=10090 GN=Ahctf1 PE=1 SV=1	0	32.743	4	9	9	9	1	2243	19.29	9	0	1.016	1.051	1.081	1.044	0.02	0.07	0.11	0.06	0.481244	0.69342	0.455783	0.808363	0.950422	0.983552	0.95685	0.987038	500479	508409	526250	549606	High	High	High	High	1145
High	Master Protein	Q9DCS3	Enoyl-[acyl-carrier-protein] reductase, mitochondrial OS=Mus musculus OX=10090 GN=Mecr PE=1 SV=2	0	225.969	77	19	73	19	1	373	225.56	19	0	1.016	1.029	1.094	1.081	0.02	0.04	0.13	0.11	0.868709	0.842698	0.961165	0.864828	0.994644	0.992047	0.996821	0.995594	8.49187e+06	8.62939e+06	8.73503e+06	9.44449e+06	High	High	High	High	1146
High	Master Protein	Q61702	Inter-alpha-trypsin inhibitor heavy chain H1 OS=Mus musculus OX=10090 GN=Itih1 PE=1 SV=2	0	26.845	7	5	5	5	1	907	16.46	5	0	1.016	1.035	1.148	1.127	0.02	0.05	0.2	0.17	0.464161	0.56956	0.923225	0.360821	0.950422	0.964126	0.992339	0.893908	531324	539815	550112	619920	High	High	High	High	1147
High	Master Protein	Q99KR3	Endoribonuclease LACTB2 OS=Mus musculus OX=10090 GN=Lactb2 PE=1 SV=1	0	29.446	26	7	9	7	1	288	27.51	7	0	1.016	0.892	1.074	1.223	0.02	-0.16	0.1	0.29	0.50267	0.0452898	0.462642	0.113089	0.951022	0.364727	0.957031	0.610239	799685	812344	713608	872555	High	High	High	High	1148
High	Master Protein	Q8BK64	Activator of 90 kDa heat shock protein ATPase homolog 1 OS=Mus musculus OX=10090 GN=Ahsa1 PE=1 SV=2	0	118.571	62	17	46	17	1	338	149.82	17	0	1.015	1.315	1.139	0.879	0.02	0.4	0.19	-0.19	0.515568	0.026821	0.952815	0.285691	0.954439	0.258352	0.996516	0.858746	3.76647e+06	3.82279e+06	4.9537e+06	4.35286e+06	High	High	High	High	1149
High	Master Protein	Q9D6Z1	Nucleolar protein 56 OS=Mus musculus OX=10090 GN=Nop56 PE=1 SV=2	0	218.89	55	30	67	30	1	580	198.38	30	0	1.015	1.109	1.062	0.972	0.02	0.15	0.09	-0.04	0.828276	0.721153	0.662321	0.679669	0.994644	0.98508	0.985087	0.970324	7.14599e+06	7.2504e+06	7.92467e+06	7.70315e+06	High	High	High	High	1150
High	Master Protein	Q9JJY3	Sphingomyelin phosphodiesterase 3 OS=Mus musculus OX=10090 GN=Smpd3 PE=1 SV=1	0	68.37	27	14	23	14	1	655	56.02	14	0	1.015	1.188	1.15	0.982	0.02	0.25	0.2	-0.03	0.536146	0.304917	0.986538	0.855867	0.964053	0.875181	0.999985	0.995594	1.57492e+06	1.59786e+06	1.87057e+06	1.83783e+06	High	High	High	High	1151
High	Master Protein	Q8JZU2	Tricarboxylate transport protein, mitochondrial OS=Mus musculus OX=10090 GN=Slc25a1 PE=1 SV=1	0	93.922	40	12	49	12	1	311	147.58	12	0	1.015	1.033	1.015	0.997	0.02	0.05	0.02	0	0.878656	0.899621	0.49582	0.711329	0.994644	0.995494	0.957561	0.970754	1.32294e+07	1.34256e+07	1.36704e+07	1.36309e+07	High	High	High	High	1152
High	Master Protein	Q8BMD6	Transmembrane protein 260 OS=Mus musculus OX=10090 GN=Tmem260 PE=2 SV=2	0	24.188	11	6	6	6	1	703	18	6	0	1.015	1.178	1.168	1.006	0.02	0.24	0.22	0.01	0.441553	0.475751	0.970067	0.940588	0.942357	0.93855	0.998629	0.998852	335772	340691	395544	398096	High	High	High	High	1153
High	Master Protein	Q91WM2	Haloacid dehalogenase-like hydrolase domain-containing 5 OS=Mus musculus OX=10090 GN=Hdhd5 PE=1 SV=1	0	42.788	23	8	11	8	1	419	30.37	8	0	1.015	1.038	1.038	1.015	0.02	0.05	0.05	0.02	0.546867	0.586435	0.252613	0.983984	0.967506	0.968459	0.858863	0.999848	1.44378e+06	1.46569e+06	1.49882e+06	1.52166e+06	High	High	High	High	1154
High	Master Protein	Q99L43	Phosphatidate cytidylyltransferase 2 OS=Mus musculus OX=10090 GN=Cds2 PE=1 SV=1	0	14.524	11	4	5	4	1	444	12.69	4	0	1.015	1.074	1.109	1.048	0.02	0.1	0.15	0.07	0.464172	0.896916	0.594174	0.783022	0.950422	0.995494	0.970956	0.986585	250751	254491	269240	282238	High	High	High	High	1155
High	Master Protein	Q8BG51	Mitochondrial Rho GTPase 1 OS=Mus musculus OX=10090 GN=Rhot1 PE=1 SV=1	0	84.733	33	19	38	17	1	631	107.76	19	2	1.015	1.013	1.058	1.06	0.02	0.02	0.08	0.08	0.467109	0.362954	0.488862	0.594987	0.950422	0.901325	0.957561	0.96579	3.2146e+06	3.26384e+06	3.25776e+06	3.45399e+06	High	High	High	High	1156
High	Master Protein	Q60737	Casein kinase II subunit alpha OS=Mus musculus OX=10090 GN=Csnk2a1 PE=1 SV=2	0	74.31	40	13	21	12	1	391	67.28	13	1	1.015	1.085	1.195	1.119	0.02	0.12	0.26	0.16	0.505012	0.926615	0.660585	0.336505	0.951532	0.995494	0.985087	0.883239	1.83158e+06	1.85993e+06	1.98655e+06	2.2225e+06	High	High	High	High	1157
High	Master Protein	Q62203	Splicing factor 3A subunit 2 OS=Mus musculus OX=10090 GN=Sf3a2 PE=1 SV=2	0	39.133	16	6	11	6	1	475	22.63	6	0	1.015	1.116	1.297	1.179	0.02	0.16	0.38	0.24	0.537595	0.784112	0.207985	0.123584	0.964198	0.988107	0.822184	0.636185	1.16805e+06	1.18544e+06	1.30406e+06	1.53804e+06	High	High	High	High	1158
High	Master Protein	P70441	Na(+)/H(+) exchange regulatory cofactor NHE-RF1 OS=Mus musculus OX=10090 GN=Slc9a3r1 PE=1 SV=3	0	119.733	55	20	46	20	1	355	121.83	20	0	1.015	0.998	1.221	1.241	0.02	0	0.29	0.31	0.562055	0.400116	0.408446	0.0876509	0.969709	0.912828	0.940044	0.554084	4.6021e+06	4.67008e+06	4.59413e+06	5.70135e+06	High	High	High	High	1159
High	Master Protein	Q9R1P0	Proteasome subunit alpha type-4 OS=Mus musculus OX=10090 GN=Psma4 PE=1 SV=1	0	57.936	46	12	19	12	1	261	46.36	12	0	1.015	1.038	1.283	1.256	0.02	0.05	0.36	0.33	0.495203	0.524826	0.209446	0.0444563	0.950422	0.951102	0.823812	0.386551	2.87225e+06	2.91673e+06	2.98105e+06	3.74312e+06	High	High	High	High	1160
High	Master Protein	Q61024	Asparagine synthetase [glutamine-hydrolyzing] OS=Mus musculus OX=10090 GN=Asns PE=1 SV=3	0	187.48	52	24	82	24	1	561	231.78	24	0	1.014	1.182	0.926	0.794	0.02	0.24	-0.11	-0.33	0.887056	0.276665	0.136782	0.0678643	0.994644	0.850084	0.690721	0.488113	1.32001e+07	1.33808e+07	1.55981e+07	1.2392e+07	High	High	High	High	1161
High	Master Protein	Q91X78	Erlin-1 OS=Mus musculus OX=10090 GN=Erlin1 PE=1 SV=2	0	168.058	53	21	77	16	1	348	213.69	21	0	1.014	1.123	0.924	0.834	0.02	0.17	-0.11	-0.26	0.697087	0.698761	0.0489395	0.160809	0.984024	0.98508	0.405967	0.708655	5.81059e+06	5.88971e+06	6.52532e+06	5.44093e+06	High	High	High	High	1162
High	Master Protein	Q3UFY7	7-methylguanosine phosphate-specific 5'-nucleotidase OS=Mus musculus OX=10090 GN=Nt5c3b PE=1 SV=3	0	24.13	21	5	7	5	1	300	20.1	5	0	1.014	1.313	1.148	0.886	0.02	0.39	0.2	-0.17	0.560171	0.0307478	0.96333	0.225907	0.96949	0.278646	0.997173	0.7902	1.0838e+06	1.09881e+06	1.42273e+06	1.26098e+06	High	High	High	High	1163
High	Master Protein	Q8VCB1	Nucleoporin NDC1 OS=Mus musculus OX=10090 GN=Ndc1 PE=1 SV=1	0	32.21	14	6	7	6	1	673	23.43	6	0	1.014	1.182	1.051	0.901	0.02	0.24	0.07	-0.15	0.501521	0.385638	0.33174	0.305297	0.950422	0.906777	0.910819	0.870663	635166	644057	750964	676592	High	High	High	High	1164
High	Master Protein	Q9CWL8	Beta-catenin-like protein 1 OS=Mus musculus OX=10090 GN=Ctnnbl1 PE=1 SV=1	0	29.243	15	8	10	8	1	563	20.93	8	0	1.014	1.27	1.145	0.914	0.02	0.34	0.2	-0.13	0.465318	0.137994	0.817731	0.353362	0.950422	0.665741	0.990777	0.888764	347781	352687	441674	403759	High	High	High	High	1165
High	Master Protein	Q5SWZ9	Mitochondrial cardiolipin hydrolase OS=Mus musculus OX=10090 GN=Pld6 PE=1 SV=1	0.001	7.691	10	3	6	2	1	221	11.25	3	0	1.014	1.113	1.037	0.944	0.02	0.15	0.05	-0.08	0.50609	0.884108	0.281004	0.630629	0.951532	0.995494	0.873913	0.968929	160771	162998	178891	168949	High	High	High	High	1166
High	Master Protein	Q9CWU6	Ubiquinol-cytochrome-c reductase complex assembly factor 1 OS=Mus musculus OX=10090 GN=Uqcc1 PE=1 SV=1	0	16.824	16	4	6	4	1	295	20.69	4	0	1.014	1.114	1.052	0.958	0.02	0.16	0.07	-0.06	0.537451	0.799569	0.335252	0.639501	0.964198	0.990464	0.911286	0.970324	1.09367e+06	1.10938e+06	1.21832e+06	1.1675e+06	High	High	High	High	1167
High	Master Protein	Q8BZA9	Fructose-2,6-bisphosphatase TIGAR OS=Mus musculus OX=10090 GN=Tigar PE=1 SV=1	0	28.453	34	6	8	6	1	269	20.68	6	0	1.014	1.332	1.265	0.962	0.02	0.41	0.34	-0.06	0.472175	0.0579951	0.460035	0.630485	0.950422	0.425243	0.957031	0.968929	248381	251757	330857	318425	High	High	High	High	1168
High	Master Protein	P13808	Anion exchange protein 2 OS=Mus musculus OX=10090 GN=Slc4a2 PE=1 SV=1	0	253.541	24	32	145	32	1	1237	421.12	32	0	1.014	1.161	1.125	0.983	0.02	0.21	0.17	-0.02	0.881345	0.355128	0.826767	0.646074	0.994644	0.89871	0.990777	0.970324	2.67077e+07	2.7094e+07	3.09957e+07	3.04792e+07	High	High	High	High	1169
High	Master Protein	Q99N87	28S ribosomal protein S5, mitochondrial OS=Mus musculus OX=10090 GN=Mrps5 PE=1 SV=1	0	73.601	37	17	26	17	1	432	74.28	17	0	1.014	1.085	1.072	1.002	0.02	0.12	0.1	0	0.497072	0.926121	0.441858	0.972993	0.950422	0.995494	0.954745	0.999848	2.16069e+06	2.19177e+06	2.34414e+06	2.34892e+06	High	High	High	High	1170
High	Master Protein	P59017	Bcl-2-like protein 13 OS=Mus musculus OX=10090 GN=Bcl2l13 PE=1 SV=2	0	67.205	26	9	22	9	1	434	60.16	9	0	1.014	1.18	1.167	1.002	0.02	0.24	0.22	0	0.499943	0.369497	0.889827	0.998529	0.950422	0.902677	0.991522	0.999848	2.17135e+06	2.20114e+06	2.56246e+06	2.56817e+06	High	High	High	High	1171
High	Master Protein	Q9CZW5	Mitochondrial import receptor subunit TOM70 OS=Mus musculus OX=10090 GN=Tomm70 PE=1 SV=2	0	269.832	54	34	119	34	1	611	311.13	34	0	1.014	1.105	1.108	1.016	0.02	0.14	0.15	0.02	0.886998	0.632229	0.934001	0.804444	0.994644	0.97492	0.993922	0.986585	1.8147e+07	1.83955e+07	2.00477e+07	2.03756e+07	High	High	High	High	1172
High	Master Protein	Q3UE37	Ubiquitin-conjugating enzyme E2 Z OS=Mus musculus OX=10090 GN=Ube2z PE=1 SV=2	0	19.31	15	5	9	5	1	356	13.76	5	0	1.014	1.149	1.151	1.017	0.02	0.2	0.2	0.02	0.537588	0.510445	0.990707	0.969414	0.964198	0.945786	0.999985	0.999848	1.31804e+06	1.33654e+06	1.51377e+06	1.53891e+06	High	High	High	High	1173
High	Master Protein	Q9JI39	ATP-binding cassette sub-family B member 10, mitochondrial OS=Mus musculus OX=10090 GN=Abcb10 PE=1 SV=1	0	91.426	25	16	26	16	1	715	71.26	16	0	1.014	1.04	1.113	1.085	0.02	0.06	0.15	0.12	0.542178	0.562098	0.699666	0.397903	0.967272	0.960081	0.986902	0.920105	1.53385e+06	1.55582e+06	1.59543e+06	1.73104e+06	High	High	High	High	1174
High	Master Protein	O55234	Proteasome subunit beta type-5 OS=Mus musculus OX=10090 GN=Psmb5 PE=1 SV=3	0	46.51	34	9	13	9	1	264	37.23	9	0	1.014	0.845	1.106	1.326	0.02	-0.24	0.15	0.41	0.552922	0.00672166	0.661499	0.0119457	0.967506	0.0931798	0.985087	0.165987	939616	952532	794255	1.0533e+06	High	High	High	High	1175
High	Master Protein	Q8R3D1	TBC1 domain family member 13 OS=Mus musculus OX=10090 GN=Tbc1d13 PE=1 SV=1	0	20.988	14	5	8	5	1	400	13.83	5	0	1.013	1.391	1.174	0.855	0.02	0.48	0.23	-0.23	0.508585	0.0240351	0.986626	0.136449	0.952009	0.24143	0.999985	0.666945	163717	165840	227769	194717	High	High	High	High	1176
High	Master Protein	Q8BPB0	MOB kinase activator 1B OS=Mus musculus OX=10090 GN=Mob1b PE=1 SV=3	0	36.166	29	7	15	7	1	216	45.93	7	0	1.013	1.271	1.168	0.931	0.02	0.35	0.22	-0.1	0.518372	0.0812566	0.880711	0.555433	0.954894	0.513372	0.990777	0.965089	2.12028e+06	2.1485e+06	2.69562e+06	2.50859e+06	High	High	High	High	1177
High	Master Protein	O70566	Protein diaphanous homolog 2 OS=Mus musculus OX=10090 GN=Diaph2 PE=1 SV=2	0	55.114	15	15	17	15	1	1098	31.28	15	0	1.013	1.178	1.093	0.94	0.02	0.24	0.13	-0.09	0.523877	0.295383	0.565508	0.4244	0.956358	0.8662	0.969841	0.921513	833402	844550	981409	922826	High	High	High	High	1178
High	Master Protein	Q9CWS4	Integrator complex subunit 11 OS=Mus musculus OX=10090 GN=Ints11 PE=1 SV=1	0	10.516	6	4	4	4	1	600	11.01	4	0	1.013	1.208	1.145	0.96	0.02	0.27	0.2	-0.06	0.497243	0.444278	0.853444	0.817251	0.950422	0.92792	0.990777	0.990603	95532	96757.3	115358	110768	High	High	High	High	1179
High	Master Protein	P62835	Ras-related protein Rap-1A OS=Mus musculus OX=10090 GN=Rap1a PE=1 SV=1	0	133.776	65	13	55	4	1	184	162.8	13	0	1.013	1.057	1.02	0.978	0.02	0.08	0.03	-0.03	0.501384	0.661949	0.217012	0.874157	0.950422	0.97492	0.835624	0.995594	2.66917e+06	2.70513e+06	2.82182e+06	2.75843e+06	High	High	High	High	1180
High	Master Protein	Q8VDW0	ATP-dependent RNA helicase DDX39A OS=Mus musculus OX=10090 GN=Ddx39a PE=1 SV=1	0	63.018	33	17	35	7	1	427	81.58	17	1	1.013	1.261	1.219	0.978	0.02	0.34	0.29	-0.03	0.582855	0.084433	0.571091	0.79849	0.9748	0.522587	0.969841	0.986585	1.04797e+06	1.06135e+06	1.32194e+06	1.29335e+06	High	High	High	High	1181
High	Master Protein	Q9WTK3	Glycosylphosphatidylinositol anchor attachment 1 protein OS=Mus musculus OX=10090 GN=Gpaa1 PE=1 SV=3	0	33.336	16	9	11	9	1	621	33.05	9	0	1.013	1.134	1.102	0.984	0.02	0.18	0.14	-0.02	0.495646	0.67933	0.636166	0.903098	0.950422	0.981182	0.982252	0.995594	2.52068e+06	2.55407e+06	2.8597e+06	2.81416e+06	High	High	High	High	1182
High	Master Protein	Q01147	Cyclic AMP-responsive element-binding protein 1 OS=Mus musculus OX=10090 GN=Creb1 PE=1 SV=2	0.002	6.689	7	3	3	3	1	327	7.88	3	0	1.013	1.09	1.078	1.002	0.02	0.12	0.11	0	0.476188	0.982435	0.434037	0.877679	0.950422	0.999773	0.951745	0.995594	238479	241525	259915	260351	High	High	High	High	1183
High	Master Protein	Q8C025	Cholinephosphotransferase 1 OS=Mus musculus OX=10090 GN=Chpt1 PE=1 SV=1	0	13.924	6	2	3	2	1	398	8.96	2	0	1.013	1.098	1.097	1.012	0.02	0.13	0.13	0.02	0.511907	0.88818	0.588251	0.918585	0.95405	0.995494	0.970956	0.997966	629783	637715	691514	699652	High	High	High	High	1184
High	Master Protein	Q61191	Host cell factor 1 OS=Mus musculus OX=10090 GN=Hcfc1 PE=1 SV=2	0	45.496	5	10	12	10	1	2045	33.09	10	0	1.013	1.166	1.168	1.015	0.02	0.22	0.22	0.02	0.524121	0.397533	0.919164	0.978692	0.956358	0.912397	0.991669	0.999848	755560	765108	881072	893926	High	High	High	High	1185
High	Master Protein	Q9D7N3	28S ribosomal protein S9, mitochondrial OS=Mus musculus OX=10090 GN=Mrps9 PE=1 SV=3	0	84.422	39	15	28	15	1	390	76.12	15	0	1.013	1.059	1.072	1.026	0.02	0.08	0.1	0.04	0.491231	0.712292	0.415636	0.84518	0.950422	0.98508	0.941185	0.994434	2.04681e+06	2.07362e+06	2.16792e+06	2.22369e+06	High	High	High	High	1186
High	Master Protein	Q8VCF0	Mitochondrial antiviral-signaling protein OS=Mus musculus OX=10090 GN=Mavs PE=1 SV=1	0	86.662	42	12	25	12	1	503	74.21	12	0	1.013	1.189	1.211	1.032	0.02	0.25	0.28	0.05	0.521683	0.311395	0.581716	0.786264	0.954894	0.876061	0.970956	0.986585	2.62331e+06	2.65635e+06	3.11858e+06	3.21776e+06	High	High	High	High	1187
High	Master Protein	Q99JR1	Sideroflexin-1 OS=Mus musculus OX=10090 GN=Sfxn1 PE=1 SV=3	0	162.97	59	13	58	11	1	322	187.96	13	0	1.013	1.035	1.063	1.04	0.02	0.05	0.09	0.06	0.854095	0.827371	0.685614	0.979734	0.994644	0.991263	0.986902	0.999848	7.36682e+06	7.4606e+06	7.62797e+06	7.92991e+06	High	High	High	High	1188
High	Master Protein	O35114	Lysosome membrane protein 2 OS=Mus musculus OX=10090 GN=Scarb2 PE=1 SV=3	0	55.787	17	8	21	8	1	478	46.75	8	0	1.013	1.098	1.132	1.044	0.02	0.14	0.18	0.06	0.499082	0.943502	0.845345	0.708297	0.950422	0.995981	0.990777	0.970754	2.03185e+06	2.05786e+06	2.23153e+06	2.32868e+06	High	High	High	High	1189
High	Master Protein	Q8BUE1	Sodium/hydrogen exchanger 4 OS=Mus musculus OX=10090 GN=Slc9a4 PE=2 SV=1	0	31.2	13	8	11	8	1	797	25.15	8	0	1.013	1.118	1.16	1.051	0.02	0.16	0.21	0.07	0.565714	0.74911	0.948177	0.737584	0.969709	0.98508	0.996515	0.977575	1.12439e+06	1.13939e+06	1.2569e+06	1.32146e+06	High	High	High	High	1190
High	Master Protein	Q9R1P3	Proteasome subunit beta type-2 OS=Mus musculus OX=10090 GN=Psmb2 PE=1 SV=1	0	24.266	24	5	8	4	1	201	18.8	5	0	1.013	1.022	1.08	1.071	0.02	0.03	0.11	0.1	0.502804	0.517882	0.424854	0.662171	0.951022	0.95004	0.947219	0.970324	464551	470630	474756	508332	High	High	High	High	1191
High	Master Protein	Q61686	Chromobox protein homolog 5 OS=Mus musculus OX=10090 GN=Cbx5 PE=1 SV=1	0	23.751	29	5	7	5	1	191	18.71	5	0	1.013	1.124	1.199	1.081	0.02	0.17	0.26	0.11	0.499739	0.800825	0.713716	0.575193	0.950422	0.990739	0.986902	0.96579	505774	512589	568485	614347	High	High	High	High	1192
High	Master Protein	Q3TIX9	U4/U6.U5 tri-snRNP-associated protein 2 OS=Mus musculus OX=10090 GN=Usp39 PE=1 SV=2	0	51.078	26	13	15	13	1	564	31.77	13	0	1.013	1.076	1.171	1.104	0.02	0.11	0.23	0.14	0.566153	0.897818	0.841766	0.302843	0.969709	0.995494	0.990777	0.870663	1.46537e+06	1.48475e+06	1.57605e+06	1.73925e+06	High	High	High	High	1193
High	Master Protein	Q6PE15	Palmitoyl-protein thioesterase ABHD10, mitochondrial OS=Mus musculus OX=10090 GN=Abhd10 PE=1 SV=1	0	9.718	10	2	2	2	1	297	4.34	2	0	1.013	1.006	1.126	1.134	0.02	0.01	0.17	0.18	0.514278	0.435188	0.730919	0.353181	0.954273	0.925756	0.986902	0.888764	158719	160741	159672	181062	High	High	High	High	1194
High	Master Protein	Q9CYH2	Peroxiredoxin-like 2A OS=Mus musculus OX=10090 GN=Prxl2a PE=1 SV=2	0	57.611	35	8	22	8	1	218	51.44	8	0	1.013	0.92	1.122	1.236	0.02	-0.12	0.17	0.31	0.526483	0.0986953	0.751007	0.0803097	0.957844	0.566234	0.986902	0.527866	815573	826510	750510	927516	High	High	High	High	1195
High	Master Protein	P62806	Histone H4 OS=Mus musculus OX=10090 GN=H4c16 PE=1 SV=2	0	164.653	58	12	202	12	1	103	604.98	12	0	1.012	1.189	0.881	0.75	0.02	0.25	-0.18	-0.42	0.89673	0.253709	0.053593	0.0281601	0.994644	0.8319	0.432001	0.290438	2.99728e+08	3.03436e+08	3.5628e+08	2.67202e+08	High	High	High	High	1196
High	Master Protein	Q9D8C2	Tetraspanin-13 OS=Mus musculus OX=10090 GN=Tspan13 PE=1 SV=1	0	23.038	19	3	8	3	1	204	26.31	3	0	1.012	0.887	0.745	0.85	0.02	-0.17	-0.43	-0.24	0.554205	0.0301178	1.22198e-05	0.107978	0.967671	0.27577	0.000441354	0.595732	983222	995174	872430	741180	High	High	High	High	1197
High	Master Protein	Q8CBG9	E3 ubiquitin-protein ligase RNF170 OS=Mus musculus OX=10090 GN=Rnf170 PE=1 SV=1	0.001	8.583	8	2	2	2	1	286	5.9	2	0	1.012	1.245	1.131	0.919	0.02	0.32	0.18	-0.12	0.496311	0.339353	0.654116	0.498038	0.950422	0.896637	0.985087	0.953034	58771.2	59487	73196.4	67271.5	High	High	High	High	1198
High	Master Protein	Q80ZK0	28S ribosomal protein S10, mitochondrial OS=Mus musculus OX=10090 GN=Mrps10 PE=1 SV=1	0	26.713	33	5	10	5	1	160	31.65	5	0	1.012	1.152	1.088	0.956	0.02	0.2	0.12	-0.07	0.476453	0.635227	0.450685	0.614843	0.950422	0.97492	0.955524	0.96579	397694	402325	458055	437860	High	High	High	High	1199
High	Master Protein	Q99J47	Dehydrogenase/reductase SDR family member 7B OS=Mus musculus OX=10090 GN=Dhrs7b PE=1 SV=1	0	73.661	36	12	23	12	1	323	52.24	12	0	1.012	1.123	1.067	0.962	0.02	0.17	0.09	-0.06	0.585138	0.732652	0.424808	0.676731	0.9748	0.98508	0.947219	0.970324	1.07381e+06	1.08709e+06	1.2063e+06	1.16036e+06	High	High	High	High	1200
High	Master Protein	Q9JL27	Galactoside alpha-(1,2)-fucosyltransferase 2 OS=Mus musculus OX=10090 GN=Fut2 PE=1 SV=1	0	59.544	39	11	19	11	1	347	49.48	11	0	1.012	1.176	1.126	0.969	0.02	0.23	0.17	-0.05	0.58021	0.371916	0.823382	0.733336	0.974192	0.902714	0.990777	0.976515	1.22737e+06	1.24187e+06	1.44396e+06	1.39856e+06	High	High	High	High	1201
High	Master Protein	Q9CRB8	Mitochondrial fission process protein 1 OS=Mus musculus OX=10090 GN=Mtfp1 PE=1 SV=1	0	36.877	29	7	16	7	1	166	40.46	7	0	1.012	1.011	0.971	0.972	0.02	0.02	-0.04	-0.04	0.585366	0.398396	0.0802146	0.666144	0.9748	0.912828	0.540486	0.970324	1.07402e+06	1.08715e+06	1.08572e+06	1.05542e+06	High	High	High	High	1202
High	Master Protein	Q9CY27	Very-long-chain enoyl-CoA reductase OS=Mus musculus OX=10090 GN=Tecr PE=1 SV=1	0	103.028	40	21	66	21	1	308	168.76	21	0	1.012	1.133	1.092	0.975	0.02	0.18	0.13	-0.04	0.873947	0.573519	0.889709	0.635602	0.994644	0.965076	0.991522	0.970324	7.64561e+06	7.73611e+06	8.66089e+06	8.44849e+06	High	High	High	High	1203
High	Master Protein	Q9WU56	Pseudouridylate synthase 1 homolog OS=Mus musculus OX=10090 GN=Pus1 PE=1 SV=2	0	14.585	15	5	5	5	1	423	12.09	5	0	1.012	1.248	1.204	0.977	0.02	0.32	0.27	-0.03	0.44219	0.200367	0.789452	0.721783	0.942827	0.765009	0.990777	0.974868	340936	345109	425388	415546	High	High	High	High	1204
High	Master Protein	Q8BGV8	Mitochondrial dynamics protein MID51 OS=Mus musculus OX=10090 GN=Mief1 PE=1 SV=1	0	10.127	6	2	2	2	1	463	6.32	2	0	1.012	1.06	1.03	0.984	0.02	0.08	0.04	-0.02	0.515452	0.784604	0.28106	0.903011	0.954439	0.988107	0.873913	0.995594	118808	120201	125910	123838	High	High	High	High	1205
High	Master Protein	Q99LH1	Nucleolar GTP-binding protein 2 OS=Mus musculus OX=10090 GN=Gnl2 PE=1 SV=2	0	9.875	6	4	4	4	1	728	3.09	4	0	1.012	1.17	1.172	1.014	0.02	0.23	0.23	0.02	0.435811	0.486361	0.983491	0.99961	0.940688	0.941647	0.999985	0.999848	323806	327691	378849	384010	High	High	High	High	1206
High	Master Protein	Q9WUL7	ADP-ribosylation factor-like protein 3 OS=Mus musculus OX=10090 GN=Arl3 PE=1 SV=1	0	25.701	41	5	9	5	1	182	28.59	5	0	1.012	1.137	1.17	1.041	0.02	0.18	0.23	0.06	0.534043	0.621926	0.920384	0.860727	0.962203	0.97492	0.991669	0.995594	677972	685813	770688	802323	High	High	High	High	1207
High	Master Protein	Q8VE19	GATOR complex protein MIOS OS=Mus musculus OX=10090 GN=Mios PE=1 SV=2	0	16.981	7	4	5	4	1	875	13.51	4	0	1.012	0.956	1.006	1.064	0.02	-0.06	0.01	0.09	0.513292	0.259679	0.194254	0.618889	0.95405	0.837016	0.796208	0.96579	119010	120390	113792	121091	High	High	High	High	1208
High	Master Protein	Q9CQ62	2,4-dienoyl-CoA reductase [(3E)-enoyl-CoA-producing], mitochondrial OS=Mus musculus OX=10090 GN=Decr1 PE=1 SV=1	0	191.954	59	16	67	16	1	335	209.07	16	0	1.012	1.038	1.108	1.08	0.02	0.05	0.15	0.11	0.901538	0.91511	0.929573	0.887343	0.994644	0.995494	0.99388	0.995594	8.98588e+06	9.0912e+06	9.32963e+06	1.00761e+07	High	High	High	High	1209
High	Master Protein	O35691	Pinin OS=Mus musculus OX=10090 GN=Pnn PE=1 SV=4	0	66.931	18	16	27	16	1	725	51.77	16	0	1.012	1.015	1.117	1.113	0.02	0.02	0.16	0.15	0.567766	0.420068	0.727394	0.280723	0.970033	0.918636	0.986902	0.853057	1.52095e+06	1.53869e+06	1.54443e+06	1.71868e+06	High	High	High	High	1210
High	Master Protein	Q9D8S9	BolA-like protein 1 OS=Mus musculus OX=10090 GN=Bola1 PE=1 SV=1	0.001	8.675	16	2	2	2	1	137	5.59	2	0	1.012	0.987	1.189	1.219	0.02	-0.02	0.25	0.29	0.489166	0.363963	0.914085	0.102736	0.950422	0.90151	0.991669	0.5812	267482	270597	263911	321834	High	High	High	High	1211
High	Master Protein	P00920	Carbonic anhydrase 2 OS=Mus musculus OX=10090 GN=Ca2 PE=1 SV=4	0	234.166	65	14	118	14	1	260	460.01	14	0	1.012	0.783	1.11	1.435	0.02	-0.35	0.15	0.52	0.896955	0.00835903	0.918242	0.0495016	0.994644	0.111543	0.991669	0.410069	2.27699e+07	2.30509e+07	1.78281e+07	2.55898e+07	High	High	High	High	1212
High	Master Protein	Q8CG47	Structural maintenance of chromosomes protein 4 OS=Mus musculus OX=10090 GN=Smc4 PE=1 SV=1	0	32.595	7	9	9	9	1	1286	18.61	9	0	1.011	1.419	1.12	0.798	0.02	0.5	0.16	-0.33	0.448539	0.0110533	0.638661	0.036208	0.944585	0.139001	0.982252	0.336456	325323	328759	461529	368331	High	High	High	High	1213
High	Master Protein	Q8VI84	Nucleolar complex protein 3 homolog OS=Mus musculus OX=10090 GN=Noc3l PE=2 SV=2	0	26.44	9	6	7	6	1	807	17.06	6	0	1.011	1.328	1.062	0.809	0.02	0.41	0.09	-0.31	0.514554	0.120679	0.411535	0.0988902	0.954273	0.623542	0.941175	0.578024	99334.2	100461	131908	106680	High	High	High	High	1214
High	Master Protein	Q99P88	Nuclear pore complex protein Nup155 OS=Mus musculus OX=10090 GN=Nup155 PE=1 SV=1	0	151.05	25	29	46	28	1	1391	139.66	29	1	1.011	1.135	1.017	0.906	0.02	0.18	0.02	-0.14	0.548857	0.613453	0.263051	0.411034	0.967506	0.974912	0.863956	0.920105	3.80692e+06	3.84786e+06	4.32239e+06	3.91462e+06	High	High	High	High	1215
High	Master Protein	O54833	Casein kinase II subunit alpha' OS=Mus musculus OX=10090 GN=Csnk2a2 PE=1 SV=1	0	26.608	25	8	8	7	1	350	18.6	8	0	1.011	1.2	1.087	0.916	0.02	0.26	0.12	-0.13	0.482539	0.369057	0.450454	0.379009	0.950422	0.902677	0.955524	0.908518	407349	411971	488786	447847	High	High	High	High	1216
High	Master Protein	Q9Z1B5	Mitotic spindle assembly checkpoint protein MAD2A OS=Mus musculus OX=10090 GN=Mad2l1 PE=1 SV=2	0	9.883	19	4	7	4	1	205	12.92	4	0	1.011	1.18	1.092	0.936	0.02	0.24	0.13	-0.1	0.482182	0.46672	0.487847	0.478982	0.950422	0.93185	0.957561	0.944206	354896	358758	418654	391919	High	High	High	High	1217
High	Master Protein	Q920R0	Alsin OS=Mus musculus OX=10090 GN=Als2 PE=1 SV=3	0.001	8.771	3	3	3	2	1	1651	4.45	3	0	1.011	1.272	1.205	0.958	0.02	0.35	0.27	-0.06	0.47819	0.325578	0.949831	0.735482	0.950422	0.893075	0.996515	0.97745	34555.6	34930	43939.8	42092.7	High	High	High	High	1218
High	Master Protein	Q9JJW0	Peroxisomal membrane protein 4 OS=Mus musculus OX=10090 GN=Pxmp4 PE=1 SV=3	0.001	7.9	11	3	5	2	1	212	12.78	3	0	1.011	1.164	1.153	1.002	0.02	0.22	0.21	0	0.466175	0.49886	0.890578	0.893437	0.950422	0.944906	0.991522	0.995594	381595	385782	444148	444910	High	High	High	High	1219
High	Master Protein	Q9EPB5	Serine hydrolase-like protein OS=Mus musculus OX=10090 GN=Serhl PE=1 SV=1	0	40.999	32	8	16	8	1	311	39.61	8	0	1.011	1.045	1.05	1.016	0.02	0.06	0.07	0.02	0.537637	0.59152	0.291954	0.896863	0.964198	0.968502	0.885753	0.995594	1.84894e+06	1.8694e+06	1.93249e+06	1.96348e+06	High	High	High	High	1220
High	Master Protein	Q3UIU2	NADH dehydrogenase [ubiquinone] 1 beta subcomplex subunit 6 OS=Mus musculus OX=10090 GN=Ndufb6 PE=1 SV=3	0	76.528	61	11	82	11	1	128	217.14	11	0	1.011	1.05	1.052	1.012	0.02	0.07	0.07	0.02	0.708255	0.806107	0.499736	0.973492	0.984024	0.991263	0.957561	0.999848	5.77431e+06	5.83679e+06	6.06263e+06	6.13817e+06	High	High	High	High	1221
High	Master Protein	Q8BGT9	Polypeptide N-acetylgalactosaminyltransferase 12 OS=Mus musculus OX=10090 GN=Galnt12 PE=2 SV=1	0	86.556	36	18	35	17	1	576	70.97	18	0	1.011	1.054	1.063	1.02	0.02	0.08	0.09	0.03	0.527092	0.625915	0.482514	0.858227	0.958289	0.97492	0.957561	0.995594	2.94758e+06	2.98127e+06	3.10663e+06	3.17009e+06	High	High	High	High	1222
[truncated: 3,167 more rows]

## Sheet: Comparisons
	Cre/flox: TMT127 (S4, S5) / TMT126 (S1, S2)
	Flox INF/Flox: TMT128 (S7, S8) / TMT126 (S1, S2)
	Cre INF/Flox INF: TMT129 (S10, S11) / TMT128 (S7, S8)
	Cre INF/Cre: TMT129 (S10, S11) / TMT127 (S4, S5)

## Sheet: Cre vs flox
original_row	protein_fdr_confidence_combined	master	accession	description	exp_q_value_combined	sum_pep_score	coverage	_peptides	_psms	_unique_peptides	_protein_groups	_aas	score_sequest_ht_sequest_ht	_peptides_by_search_engine_sequest_ht	_razor_peptides	abundance_ratio_f1_127_f1_126	abundance_ratio_f1_128_f1_126	abundance_ratio_f1_129_f1_127	abundance_ratio_f1_129_f1_128	abundance_ratio_log2_f1_127_f1_126.x	abundance_ratio_log2_f1_128_f1_126	abundance_ratio_log2_f1_129_f1_127	abundance_ratio_log2_f1_129_f1_128	abundance_ratio_p_value_f1_127_f1_126	abundance_ratio_p_value_f1_128_f1_126	abundance_ratio_p_value_f1_129_f1_127	abundance_ratio_p_value_f1_129_f1_128	abundance_ratio_adj_p_value_f1_127_f1_126	abundance_ratio_adj_p_value_f1_128_f1_126	abundance_ratio_adj_p_value_f1_129_f1_127	abundance_ratio_adj_p_value_f1_129_f1_128	abundance_f1_126_sample	abundance_f1_127_sample	abundance_f1_128_sample	abundance_f1_129_sample	found_in_sample_s1_f1_126_sample	found_in_sample_s2_f1_127_sample	found_in_sample_s3_f1_128_sample	found_in_sample_s4_f1_129_sample	abundance_ratio_log2_f1_127_f1_126.y	normalized_log2	z_score	p_value	rank	b_h	significant	normalized_fc
[truncated: 4,389 more rows]

[truncated: 3 more sheets: FloxHp vs flox, CreHp vs Cre, CreHp vs floxHp]
